# Supplementary material for: Transcription mediated insulation and interference direct gene cluster expression switches
Source: eLife journal article supplement (doi:10.7554/elife.03635), 2014-11-19

**4A NC-NC-NC-NC**

Microarray

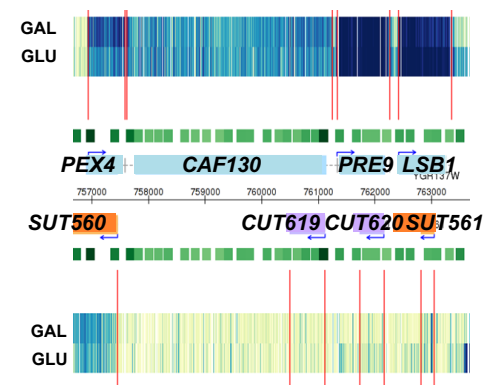

NET-seq

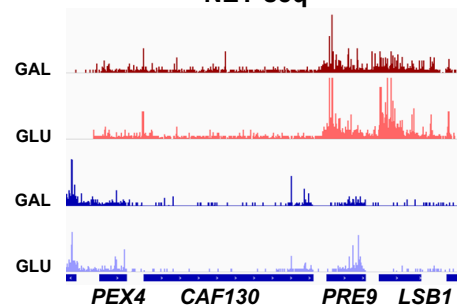

TIF-seq

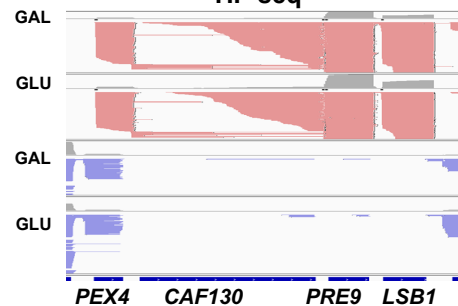

YMC Expression

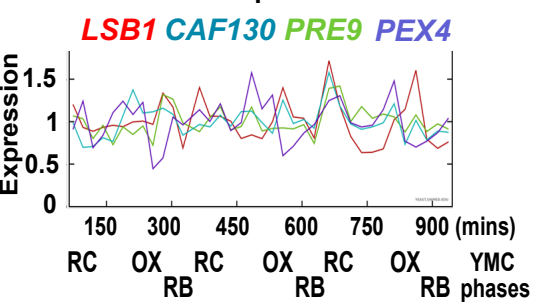**B NC-NC-NC**

Microarray

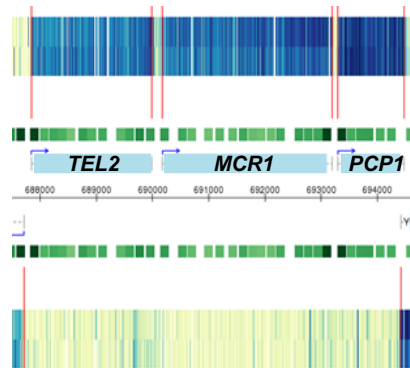

NET-seq

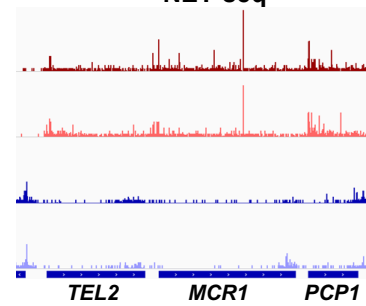

TIF-seq

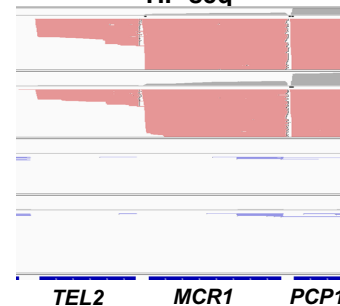

YMC Expression

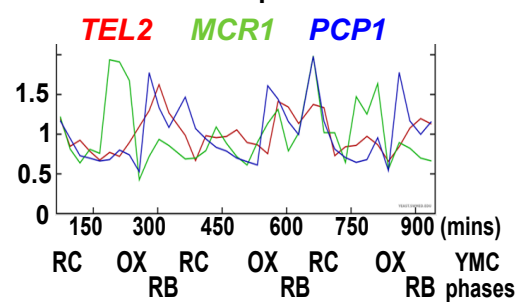**C NC-NC-NC-NC**

Microarray

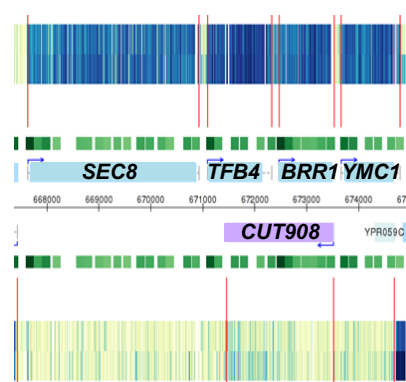

NET-seq

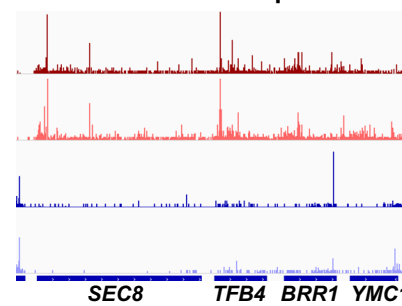

TIF-seq

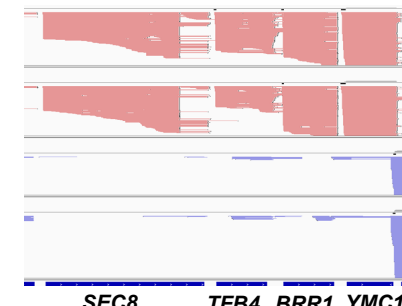

YMC Expression

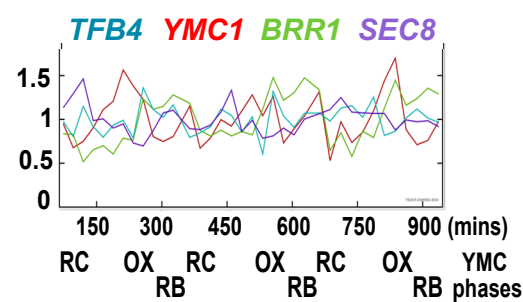**D NC-NC-NC**

Microarray

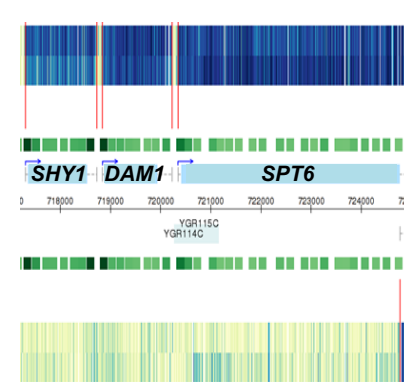

NET-seq

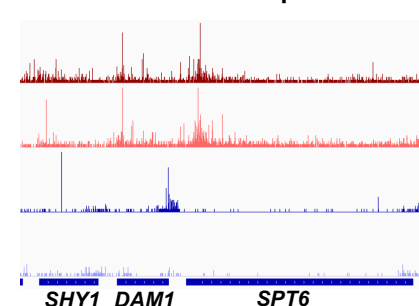

TIF-seq

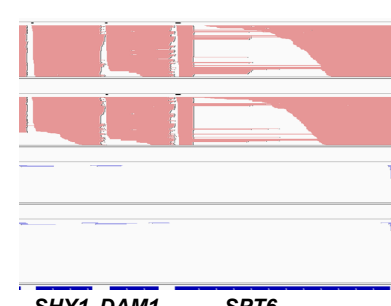

YMC Expression

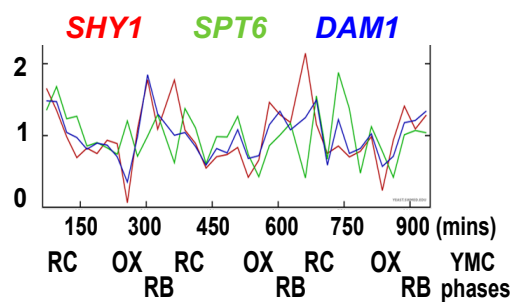

Supplement: supp [file elife_poa_e03635_Figure_1_figure_supplement_4.pdf › elife_poa_e03635_Figure_1_figure_supplement_4.pdf]
