# Supplementary material for: Transcription mediated insulation and interference direct gene cluster expression switches
Source: eLife journal article supplement (doi:10.7554/elife.03635), 2014-11-19

**A (i)**

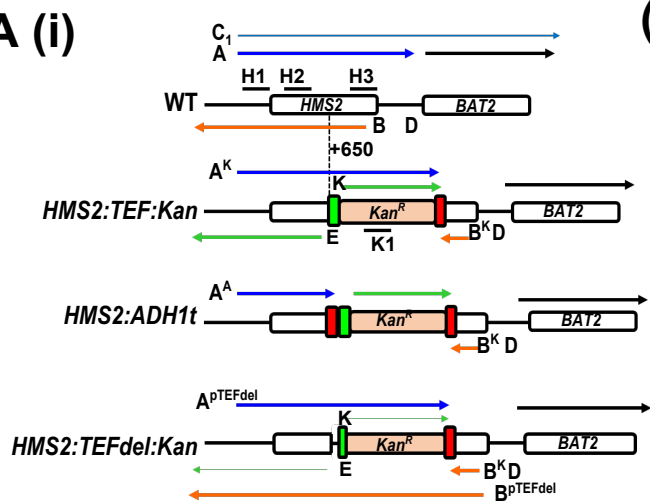

**(ii)**

| Transcript           | Estimated Size (bp) |
|----------------------|---------------------|
| A <sup>K</sup>       | 2300                |
| A <sup>pTEF</sup>    | 1200                |
| K                    | 1350                |
| E                    | 1400                |
| A <sup>A</sup>       | 850                 |
| B <sup>K</sup>       | 550                 |
| B <sup>A</sup>       | 550                 |
| A <sup>pTEFdel</sup> | 2800                |
| B <sup>pTEFdel</sup> | 3150                |

**B**

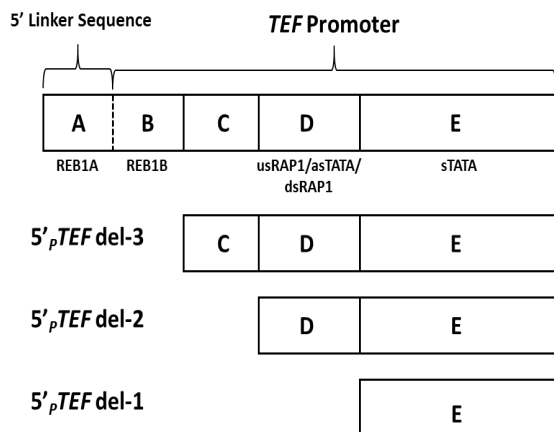

| Deletion    | Size | Excluded Motifs                                |
|-------------|------|------------------------------------------------|
| 5'pTEFdel-3 | 73   | REB1A, REB1B                                   |
| 5'pTEFdel-2 | 120  | REB1A, REB1B, Region C                         |
| 5'pTEFdel-1 | 217  | REB1A, REB1B, Region C, usRAP1, asTATA, dsRAP1 |

**C**

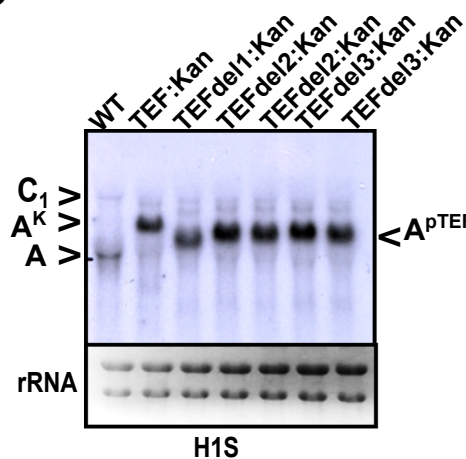

**D**

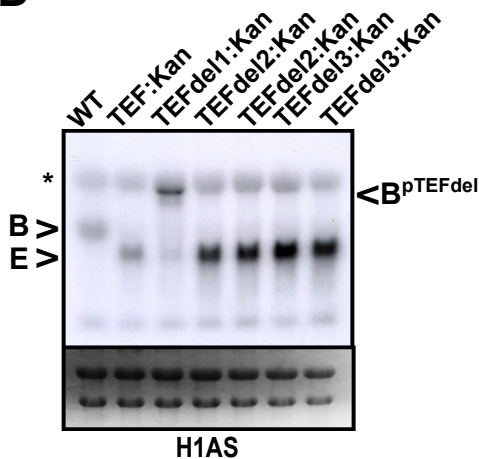

**E**

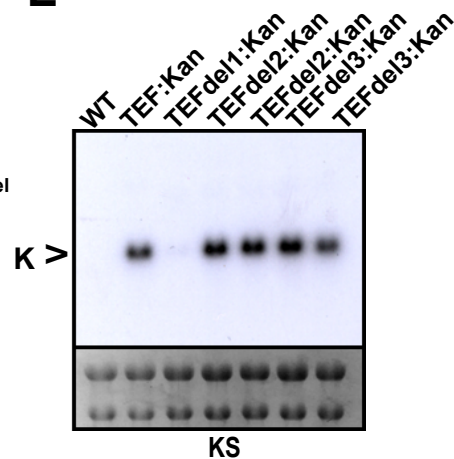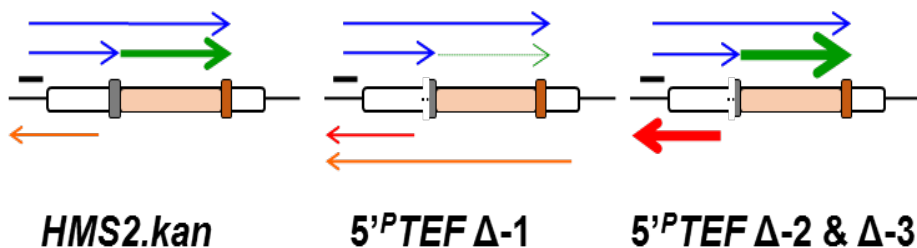

Supplement: supp [file elife_poa_e03635_Figure_7_figure_supplement_1.pdf › elife_poa_e03635_Figure_7_figure_supplement_1.pdf]
