# Supplementary material for: Transcription mediated insulation and interference direct gene cluster expression switches
Source: eLife journal article supplement (doi:10.7554/elife.03635), 2014-11-19
Supplement: supp [file elife_poa_e03635_Supplementary_File_1.xlsx]

## Sheet:  Supplementary File 1A
id	tx_ID	chr	strand	start	end	type	name	alias	glusco	gluasco	galsco	galasco	glunorm	galnorm	glength	502_glu1	antilog_glu	503_gal1	antilog_gal	glunocpb	galnocpb	netglu/netgal	miglu/migal	netglu/miglu	netgal/migal	net/micro
2	ST0002	chrI	+	30073	30905	CUTs	CUT001	CUT001	675	359	432	204	633.922	459.993	833	-4.31499	0.0133666	-4.60137	0.0100381	0.761011	0.552213	1.37811	1.33159	56.9336	55.0117	1.03494
33	ST0033	chrI	+	138607	138831	CUTs	CUT002	CUT002	108	3	92	29	101.428	97.9615	225	-4.3052	0.0134982	-3.9252	0.0197383	0.450789	0.435385	1.03538	0.683857	33.3964	22.0579	1.51403
35	ST0035	chrI	+	143439	143599	CUTs	CUT003	CUT003	422	0	151	3	396.319	160.785	161	-5.01705	0.00662407	-4.69123	0.00917543	2.46161	0.998663	2.4649	0.721935	371.616	108.841	3.4143
41	ST0041	chrI	+	170495	172447	CUTs	CUT004	CUT004	397	471	112	421	372.84	119.258	1953	-4.57083	0.0103494	-4.3685	0.0126703	0.190906	0.0610638	3.12635	0.816824	18.4462	4.81945	3.82744
43	ST0043	chrI	+	180255	180511	CUTs	CUT005	CUT005	184	26	307	47	172.803	326.893	257	-4.19092	0.0151324	-4.66087	0.00945821	0.672383	1.27196	0.528621	1.59993	44.4333	134.482	0.330403
1	ST0001	chrI	+	9369	9601	SUTs	SUT001	SUT001	15	4	12	7	14.0872	12.7776	233	-4.17354	0.0153976	-3.26408	0.0382323	0.0604599	0.0548394	1.10249	0.402739	3.92657	1.43438	2.73748
10	ST0010	chrI	+	43441	45329	SUTs	SUT002	SUT002	312	2183	326	5861	293.013	347.125	1889	-2.98951	0.0503121	-4.67481	0.00932725	0.155115	0.183761	0.844115	5.39409	3.08307	19.7015	0.156489
16	ST0016	chrI	+	68719	69487	SUTs	SUT003	SUT003	174	635	694	1292	163.411	738.971	769	-3.48288	0.0307187	-3.7513	0.0234871	0.212498	0.96095	0.221133	1.3079	6.91755	40.9139	0.169076
47	ST0047	chrI	+	198775	199895	SUTs	SUT004	SUT004	469	16	490	32	440.459	521.752	1121	0.0667568	1.06904	-0.335913	0.714685	0.392916	0.465434	0.844192	1.49581	0.367542	0.651244	0.56437
36	ST0036	chrI	+	143599	147599	ORF-T	YAL002W	VPS8	927	61	1131	126	870.587	1204.29	4001	-1.00159	0.367295	-0.384311	0.68092	0.217592	0.300997	0.722906	0.53941	0.592418	0.442044	1.34018
34	ST0034	chrI	+	142127	143439	ORF-T	YAL003W, snR18	EFB1, SNR18	22406	90	22830	58	21042.5	24309.4	1313	2.89119	18.0147	2.44311	11.5088	16.0262	18.5144	0.865612	1.5653	0.889621	1.60872	0.553001
32	ST0032	chrI	+	136863	137639	ORF-T	YAL008W	FUN14	354	166	1247	87	332.457	1327.8	777	0.496634	1.64318	1.84233	6.31122	0.427873	1.70889	0.250381	0.260359	0.260393	0.270769	0.961677
31	ST0031	chrI	+	135823	136703	ORF-T	YAL009W	SPO7	501	132	540	132	470.511	574.992	881	-0.066387	0.935769	-0.0751904	0.927567	0.534065	0.652658	0.818292	1.00884	0.570723	0.703623	0.81112
30	ST0030	chrI	+	132199	134111	ORF-T	YAL011W	SWC3	615	42	546	67	577.574	581.38	1913	-1.25139	0.286106	-0.349688	0.704908	0.30192	0.30391	0.993452	0.405877	1.05528	0.431135	2.44767
29	ST0029	chrI	+	130703	132087	ORF-T	YAL012W	CYS3	2770	9	313	80	2601.43	333.282	1385	1.76409	5.83628	-1.08815	0.336841	1.87829	0.240637	7.80549	17.3265	0.32183	0.714394	0.450493
28	ST0028	chrI	+	129239	130567	ORF-T	YAL013W	DEP1	1112	23	1015	23	1044.33	1080.77	1329	0.0614317	1.06336	0.408539	1.50462	0.7858	0.813221	0.966281	0.70673	0.73898	0.540484	1.36726
27	ST0027	chrI	+	124799	126863	ORF-T	YAL016W	TPD3	2180	36	2601	47	2047.33	2769.54	2065	0.987763	2.68522	1.09918	3.00171	0.991445	1.34118	0.739232	0.894564	0.369223	0.446806	0.82636
26	ST0026	chrI	+	119863	124447	ORF-T	YAL017W	PSK1	798	25	2376	52	749.437	2529.96	4585	-0.0712074	0.931269	0.455318	1.57668	0.163454	0.551791	0.296225	0.590653	0.175518	0.349971	0.50152
25	ST0025	chrI	+	114815	118391	other	YAL019W-A, YAL019W	YAL019W-A, FUN30	1643	21	534	31	1543.01	568.603	3577	-0.224312	0.799066	-1.12344	0.325159	0.431371	0.158961	2.71369	2.45746	0.539844	0.488872	1.10427
24	ST0024	chrI	+	94607	95543	ORF-T	YAL027W	YAL027W	410	87	488	88	385.049	519.622	937	0.222955	1.24976	0.899804	2.45912	0.410938	0.554559	0.741018	0.508216	0.328812	0.225511	1.45808
23	ST0023	chrI	+	92855	94487	ORF-T	YAL028W	FRT2	216	101	967	29	202.855	1029.66	1633	-0.774671	0.460855	-0.221609	0.801228	0.124222	0.630533	0.197012	0.575186	0.269547	0.786958	0.342518
22	ST0022	chrI	+	87263	87783	ORF-T	YAL030W	SNC1	166	111	481	119	155.898	512.168	521	-0.079394	0.923676	1.1386	3.12239	0.299228	0.983049	0.304388	0.295823	0.323954	0.314838	1.02895
21	ST0021	chrI	+	82695	83311	ORF-T	YAL033W	POP5	688	91	289	135	646.131	307.727	617	1.2085	3.34847	0.237726	1.26836	1.04721	0.498747	2.09969	2.64	0.312744	0.393221	0.795338
20	ST0020	chrI	+	79695	80647	ORF-T	YAL034W-A	MTW1	275	51	279	220	258.265	297.079	953	-1.9919	0.136436	-1.36416	0.255594	0.271002	0.31173	0.869347	0.5338	1.98629	1.21963	1.6286
19	ST0019	chrI	+	76383	79535	ORF-T	YAL035W	FUN12	5205	10	2229	51	4888.25	2373.44	3153	1.19946	3.31831	0.705277	2.02441	1.55035	0.752755	2.05956	1.63915	0.46721	0.37184	1.25648
18	ST0018	chrI	+	73935	74959	ORF-T	YAL037W	YAL037W	123	298	82	151	115.515	87.3135	1025	-0.465358	0.627911	-1.79356	0.166368	0.112697	0.0851839	1.32299	3.77424	0.17948	0.512022	0.350531
17	ST0017	chrI	+	71679	73447	ORF-T	YAL038W	CDC19	42729	31	9984	20	40128.7	10631	1769	2.90626	18.2883	2.77322	16.01	22.6844	6.00958	3.7747	1.1423	1.24038	0.375364	3.30447
15	ST0015	chrI	+	62791	65607	ORF-T	YAL041W	CDC24	1341	129	1059	140	1259.39	1127.62	2817	0.254585	1.28993	-0.358753	0.698547	0.447069	0.400292	1.11686	1.84658	0.346585	0.573035	0.604823
14	ST0014	chrI	+	61279	62647	ORF-T	YAL042W	ERV46	2220	21	1816	39	2084.9	1933.68	1369	1.89876	6.67764	1.51905	4.5679	1.52294	1.41247	1.07821	1.46186	0.228065	0.309217	0.737557
13	ST0013	chrI	+	57503	57959	ORF-T	YAL044W-A	YAL044W-A	282	404	625	448	264.839	665.499	457	0.477574	1.61216	1.51004	4.52689	0.579516	1.45624	0.397955	0.356129	0.359466	0.321686	1.11744
12	ST0012	chrI	+	48513	51799	ORF-T	YAL051W	OAF1	808	47	844	102	758.829	898.69	3287	-0.999468	0.368075	-0.571661	0.564587	0.230857	0.273408	0.844371	0.651937	0.627202	0.484261	1.29517
11	ST0011	chrI	+	45761	48305	ORF-T	YAL053W	FLC2	1880	19	1418	52	1765.59	1509.89	2545	1.06935	2.91349	0.766443	2.1521	0.693749	0.593275	1.16935	1.35379	0.238116	0.275673	0.863763
9	ST0009	chrI	+	42161	42833	ORF-T	YAL055W	PEX22	267	121	600	372	250.752	638.879	673	-0.732701	0.480609	0.477801	1.61252	0.372588	0.949301	0.392486	0.298048	0.77524	0.588705	1.31686
8	ST0008	chrI	+	39217	41969	ORF-T	YAL056W	GPB2	1259	20	1556	44	1182.38	1656.83	2753	0.244223	1.27663	0.525816	1.69184	0.429489	0.601826	0.713643	0.754581	0.336424	0.355723	0.945747
7	ST0007	chrI	+	37409	39033	ORF-T	YAL058W	CNE1	846	49	519	33	794.516	552.631	1625	-0.347887	0.706178	-0.27499	0.75958	0.488933	0.34008	1.4377	0.929696	0.692365	0.447722	1.54642
6	ST0006	chrI	+	36545	37329	ORF-T	YAL059W	ECM1	953	146	113	93	895.004	120.322	785	1.23852	3.4505	0.273171	1.31412	1.14013	0.153277	7.43839	2.6257	0.330425	0.116638	2.83291
5	ST0005	chrI	+	35097	36393	ORF-T	YAL060W	BDH1	1009	602	8842	34	947.597	9414.95	1297	1.14635	3.1467	2.47629	11.8971	0.730606	7.25902	0.100648	0.264494	0.232182	0.610152	0.380531
4	ST0004	chrI	+	33361	34897	ORF-T	YAL061W	BDH2	310	861	4282	1356	291.135	4559.47	1537	-0.373524	0.688305	1.59191	4.91312	0.189418	2.96647	0.0638528	0.140095	0.275194	0.603786	0.455781
3	ST0003	chrI	+	31153	32985	ORF-T	YAL062W	GDH3	760	494	1494	1126	713.75	1590.81	1833	-2.30875	0.0993854	1.66267	5.27336	0.389389	0.867872	0.448671	0.0188467	3.91797	0.164577	23.8063
37	ST0037	chrI	+	152215	153991	ORF-T	YAR002W	NUP60	895	130	461	102	840.534	490.872	1777	0.485088	1.62432	-0.297009	0.743037	0.473007	0.276237	1.71233	2.18605	0.291204	0.371767	0.783297
38	ST0038	chrI	+	154935	156807	ORF-T	YAR003W	SWD1	777	74	571	85	729.715	608	1873	0.523094	1.68724	0.0157398	1.01586	0.389597	0.324613	1.20019	1.66089	0.230908	0.319544	0.722617
39	ST0039	chrI	+	158863	159871	ORF-T	YAR008W	SEN34	303	15	212	25	284.561	225.737	1009	0.0820892	1.08555	-0.684774	0.504204	0.282023	0.223724	1.26058	2.153	0.259796	0.443717	0.5855
40	ST0040	chrI	+	169255	170479	ORF-T	YAR015W	ADE1	5895	63	857	70	5536.26	912.533	1225	1.47372	4.36545	0.918222	2.50483	4.51939	0.744925	6.06691	1.74281	1.03526	0.297395	3.48111
42	ST0042	chrI	+	175303	176223	other	YAR019W-A	YAR019W-A	331	10	304	11	310.857	323.699	921	-0.877947	0.415635	-0.816235	0.442093	0.337521	0.351465	0.960327	0.940153	0.81206	0.795001	1.02146
44	ST0044	chrI	+	184831	186735	ORF-T	YAR028W, YAR029W	YAR028W, YAR029W	914	20	393	43	858.378	418.466	1905	0.408925	1.5052	-0.914293	0.4008	0.450592	0.219667	2.05125	3.75549	0.299357	0.548072	0.5462
45	ST0045	chrI	+	189991	192391	ORF-T	YAR035W	YAT1	85	87	283	161	79.8273	301.338	2401	-3.70028	0.0247166	-0.855725	0.424975	0.0332475	0.125505	0.264909	0.05816	1.34515	0.295324	4.55483
46	ST0046	chrI	+	192583	196255	ORF-T	YAR042W	SWH1	1367	15	1345	44	1283.81	1432.15	3673	-0.401578	0.669263	0.276484	1.31849	0.349526	0.389914	0.896419	0.5076	0.522256	0.295729	1.76599
3636	ST3636	chrI	-	10733	11141	CUTs	CUT436	CUT436	50	4	123	15	46.9572	130.97	409	-5.24182	0.00529064	-4.89206	0.00750592	0.11481	0.320221	0.358533	0.704862	21.7005	42.6624	0.508657
3638	ST3638	chrI	-	30533	30893	CUTs	CUT437	CUT437	252	76	158	79	236.664	168.238	361	-5.15129	0.00579192	-4.56285	0.0104323	0.65558	0.466034	1.40672	0.55519	113.189	44.6721	2.53377
3641	ST3641	chrI	-	34381	34749	CUTs	CUT438	CUT438	129	62	800	616	121.15	851.839	369	-4.55371	0.0105281	-4.49764	0.0111352	0.328319	2.30851	0.142221	0.945475	31.185	207.315	0.150423
3642	ST3642	chrI	-	35797	36349	CUTs	CUT439	CUT439	577	304	17	2707	541.886	18.1016	553	-4.2398	0.0144104	-4.96027	0.00701104	0.979903	0.0327334	29.9358	2.05539	67.9995	4.66884	14.5645
3652	ST3652	chrI	-	67851	67963	CUTs	CUT440	CUT440	67	0	38	1	62.9227	40.4624	113	-4.61011	0.00995077	-5.44171	0.00433205	0.556838	0.358074	1.55509	2.29701	55.9593	82.6569	0.677007
3672	ST3672	chrI	-	151619	152035	CUTs	CUT441	CUT441	170	6	52	1	159.655	55.3696	417	-4.76994	0.0084809	-4.51028	0.0109954	0.382865	0.132781	2.88344	0.771316	45.1444	12.0761	3.73833
3679	ST3679	chrI	-	199979	200419	CUTs	CUT442	CUT442	146	12	149	17	137.115	158.655	441	-2.28824	0.101445	-3.77468	0.0229445	0.310919	0.359762	0.864234	4.42132	3.06489	15.6797	0.195469
3634	ST3634	chrI	-	5076	6237	SUTs	SUT432	SUT432	100	8	100	16	93.9144	106.48	1162	-3.45298	0.0316511	-1.8424	0.158437	0.0808214	0.091635	0.881992	0.199771	2.55351	0.57837	4.41501
3637	ST3637	chrI	-	28085	29773	SUTs	SUT433	SUT433	247	32	51	54	231.969	54.3048	1689	-3.35055	0.0350651	-4.64717	0.00958869	0.137341	0.032152	4.27161	3.65692	3.91674	3.35312	1.16809
3639	ST3639	chrI	-	31485	32749	SUTs	SUT434	SUT434	284	245	571	1050	266.717	608	1265	-2.21504	0.109149	-2.34698	0.0956577	0.210843	0.480633	0.438679	1.14104	1.93171	5.02451	0.384457
3640	ST3640	chrI	-	33077	34381	SUTs	SUT435	SUT435	715	127	566	4145	671.488	602.676	1305	-1.43026	0.239247	-3.04768	0.0474688	0.51455	0.461821	1.11418	5.04008	2.15071	9.72893	0.221064
3678	ST3678	chrI	-	191611	192195	SUTs	SUT436	SUT436	11	38	53	67	10.3306	56.4344	585	-4.66333	0.00943497	-3.79362	0.0225139	0.0176591	0.096469	0.183055	0.419073	1.87167	4.28487	0.436809
3671	ST3671	chrI	-	147523	151211	ORF-T	YAL001C	TFC3	835	39	1404	66	784.185	1494.98	3689	-0.359154	0.698267	-0.221123	0.801618	0.212574	0.405253	0.524546	0.871071	0.304431	0.505544	0.602185
3670	ST3670	chrI	-	139371	141683	ORF-T	YAL005C	SSA1	2263	59	5395	30	2125.28	5744.59	2313	2.54724	12.7719	2.78661	16.2259	0.918843	2.48361	0.369962	0.787126	0.0719428	0.153064	0.470017
3669	ST3669	chrI	-	137571	138451	ORF-T	YAL007C	ERP2	1109	74	584	185	1041.51	621.843	881	1.48578	4.41841	0.386154	1.47131	1.18219	0.705837	1.67488	3.00304	0.26756	0.479733	0.557727
3668	ST3668	chrI	-	134091	135707	ORF-T	YAL010C	MDM10	406	57	374	66	381.293	398.235	1617	-0.397249	0.672167	-0.174137	0.840182	0.235802	0.24628	0.957456	0.800025	0.350809	0.293127	1.19678
3667	ST3667	chrI	-	128171	129075	ORF-T	YAL014C	SYN8	1310	48	991	72	1230.28	1055.22	905	0.343063	1.40926	0.630958	1.87941	1.35942	1.16598	1.1659	0.74984	0.964639	0.620399	1.55487
3666	ST3666	chrI	-	126747	128075	ORF-T	YAL015C	NTG1	396	184	517	231	371.901	550.501	1329	-0.115984	0.890489	-0.179534	0.83566	0.279835	0.414222	0.675568	1.06561	0.314249	0.495683	0.633972
3665	ST3665	chrI	-	113563	114683	ORF-T	YAL020C	ATS1	874	235	643	134	820.812	684.666	1121	-0.713206	0.49007	0.267781	1.30706	0.732214	0.610763	1.19885	0.374941	1.4941	0.46728	3.19744
3664	ST3664	chrI	-	110619	113435	ORF-T	YAL021C	CCR4	1792	51	1445	88	1682.95	1538.63	2817	0.664375	1.94327	0.677857	1.96965	0.597425	0.546196	1.09379	0.986608	0.307432	0.277306	1.10864
3663	ST3663	chrI	-	108859	110467	ORF-T	YAL022C	FUN26	996	21	864	16	935.388	919.986	1609	0.409048	1.50538	-0.00728669	0.99274	0.581347	0.571775	1.01674	1.51639	0.386179	0.575957	0.670499
3662	ST3662	chrI	-	106163	108667	ORF-T	YAL023C	PMT2	4263	12	1780	32	4003.57	1895.34	2505	1.42756	4.16854	0.338123	1.40231	1.59823	0.756624	2.11232	2.97261	0.383404	0.539554	0.710594
3661	ST3661	chrI	-	101483	105987	ORF-T	YAL024C	LTE1	788	55	687	43	740.046	731.517	4505	-2.14866	0.116641	-2.34216	0.0961198	0.164272	0.162379	1.01166	1.21349	1.40836	1.68934	0.833675
3660	ST3660	chrI	-	100059	101171	ORF-T	YAL025C	MAK16	2388	8	281	14	2242.68	299.209	1113	1.06715	2.90709	0.453689	1.57411	2.01498	0.268831	7.49536	1.84681	0.693128	0.170783	4.05854
3659	ST3659	chrI	-	95499	99787	ORF-T	YAL026C-A, YAL026C	YAL026C-A, DRS2	1472	42	937	71	1382.42	997.717	4289	-0.0728581	0.929733	-0.570655	0.565155	0.322318	0.232622	1.38558	1.64509	0.346678	0.411608	0.842253
3658	ST3658	chrI	-	87699	92515	ORF-T	YAL029C	MYO4	1933	103	1183	308	1815.37	1259.66	4817	0.145039	1.15608	-0.426117	0.65304	0.376866	0.261502	1.44116	1.77031	0.325985	0.400439	0.814071
3657	ST3657	chrI	-	84739	87075	ORF-T	YAL031C	GIP4	723	108	925	157	679.001	984.939	2337	-0.70064	0.496268	-0.361809	0.696415	0.290544	0.421455	0.689384	0.712603	0.585458	0.605177	0.967416
3656	ST3656	chrI	-	83251	84507	ORF-T	YAL032C	PRP45	500	130	819	104	469.572	872.071	1257	-0.795406	0.451398	-0.168313	0.845089	0.373566	0.693771	0.538457	0.534142	0.827575	0.820944	1.00808
3655	ST3655	chrI	-	80603	82587	ORF-T	YAL034C	FUN19	922	90	2467	182	865.891	2626.86	1985	-0.741851	0.476231	1.20854	3.34859	0.436217	1.32335	0.32963	0.142219	0.915977	0.395198	2.31777
3654	ST3654	chrI	-	74875	76211	ORF-T	YAL036C	RBG1	2070	24	402	68	1944.03	428.049	1337	0.598073	1.81861	-0.00150962	0.998492	1.45402	0.320157	4.5416	1.82136	0.799524	0.32064	2.49352
3653	ST3653	chrI	-	68651	69611	ORF-T	YAL039C	CYC3	784	185	1570	711	736.289	1671.73	961	0.097977	1.10294	1.28999	3.63276	0.76617	1.73958	0.440434	0.303608	0.694663	0.478858	1.45067
3651	ST3651	chrI	-	65467	67851	ORF-T	YAL040C	CLN3	2297	101	1920	111	2157.21	2044.41	2385	0.370128	1.44792	0.972922	2.64567	0.904492	0.857197	1.05517	0.54728	0.624684	0.324001	1.92803
3650	ST3650	chrI	-	58611	61091	ORF-T	YAL043C	PTA1	1757	64	1106	86	1650.08	1177.67	2481	-0.692752	0.500198	-0.293134	0.745922	0.665085	0.474675	1.40114	0.670577	1.32964	0.63636	2.08945
3649	ST3649	chrI	-	57875	58483	ORF-T	YAL044C	GCV3	1616	86	1366	275	1517.66	1454.52	609	2.3601	10.592	2.56028	12.9395	2.49205	2.38837	1.04341	0.818582	0.235276	0.18458	1.27466
3648	ST3648	chrI	-	56923	57419	ORF-T	YAL046C	YAL046C	323	138	485	77	303.344	516.428	497	-0.0116707	0.988397	0.802441	2.23098	0.610349	1.03909	0.587388	0.443033	0.617514	0.465755	1.32584
3647	ST3647	chrI	-	54955	56923	ORF-T	YAL047C	SPC72	507	75	506	68	476.146	538.788	1969	-2.0896	0.123737	-1.4831	0.226932	0.241821	0.273636	0.883735	0.545259	1.95432	1.2058	1.62076
3646	ST3646	chrI	-	52659	54843	ORF-T	YAL048C	GEM1	676	74	805	105	634.862	857.163	2185	-0.943323	0.389332	-0.138023	0.871079	0.290554	0.392294	0.740654	0.446954	0.746289	0.450355	1.65712
3645	ST3645	chrI	-	51739	52659	ORF-T	YAL049C	YAL049C	394	45	532	50	370.023	566.473	921	0.82396	2.27951	1.61858	5.0459	0.401762	0.615063	0.653205	0.451755	0.176249	0.121894	1.44593
3644	ST3644	chrI	-	43549	45069	ORF-T	YAL054C	ACS1	2160	269	5744	317	2028.55	6116.21	1521	-4.72702	0.00885278	2.24124	9.40503	1.3337	4.02117	0.331668	0.000941282	150.653	0.427556	352.358
3643	ST3643	chrI	-	42741	43549	ORF-T	YAL054C	ACS1	176	234	927	162	165.289	987.069	809	-0.564286	0.568766	2.08277	8.02668	0.204313	1.22011	0.167455	0.0708594	0.359222	0.152007	2.3632
3635	ST3635	chrI	-	7277	9261	ORF-T	YAL067C	SEO1	44	20	56	52	41.3223	59.6288	1985	-4.57637	0.0102921	-3.39227	0.0336322	0.0208173	0.0300397	0.692994	0.30602	2.02264	0.893182	2.26453
3673	ST3673	chrI	-	153899	154763	ORF-T	YAR002C-A	ERP1	1339	90	715	49	1257.51	761.331	865	1.52836	4.61059	1.38567	3.99751	1.45377	0.880152	1.65173	1.15337	0.315312	0.220175	1.43209
3674	ST3674	chrI	-	156747	158699	ORF-T	YAR007C	RFA1	733	35	713	45	688.393	759.202	1953	0.33158	1.39317	0.157831	1.17097	0.35248	0.388736	0.906732	1.18976	0.253006	0.331978	0.762115
3675	ST3675	chrI	-	166611	169027	ORF-T	YAR014C	BUD14	1481	19	899	35	1390.87	957.254	2417	0.203665	1.22589	-0.379576	0.684152	0.575454	0.396051	1.45298	1.79184	0.469419	0.578893	0.81089
3676	ST3676	chrI	-	170227	171723	ORF-T	YAR018C	KIN3	487	961	376	170	457.363	400.364	1497	-1.13903	0.320128	-0.912637	0.401464	0.30552	0.267445	1.14237	0.797401	0.954368	0.666173	1.43261
3677	ST3677	chrI	-	172163	175179	ORF-T	YAR019C	CDC15	548	112	796	76	514.651	847.58	3017	-1.6609	0.189969	-1.20676	0.299166	0.170584	0.280935	0.6072	0.634993	0.897957	0.939058	0.956231
64	ST0064	chrII	+	96354	96570	CUTs	CUT006	CUT006	36	49	536	102	33.8092	570.732	217	-4.15825	0.015635	0.123148	1.13105	0.155803	2.6301	0.0592383	0.0138234	9.96502	2.32536	4.28537
89	ST0089	chrII	+	191991	192343	CUTs	CUT007	CUT007	479	68	189	55	449.85	201.247	353	-3.8577	0.0211164	-3.62402	0.0266751	1.27436	0.570105	2.23531	0.791614	60.3494	21.3721	2.82374
100	ST0100	chrII	+	237744	237928	CUTs	CUT008	CUT008	4	7	211	11	3.75658	224.673	185	-4.81051	0.00814373	-3.84932	0.0212943	0.0203058	1.21445	0.0167202	0.382438	2.49343	57.0317	0.0437201
108	ST0108	chrII	+	254872	255056	CUTs	CUT009	CUT009	15	300	6	207	14.0872	6.38879	185	-1.12081	0.326014	-3.78741	0.0226543	0.0761468	0.034534	2.20498	14.3909	0.233569	1.52439	0.153221
117	ST0117	chrII	+	296288	296576	CUTs	CUT010	CUT010	237	146	60	167	222.577	63.8879	289	-3.2425	0.0390661	-3.68359	0.0251325	0.770163	0.221066	3.48387	1.55441	19.7144	8.79601	2.24128
121	ST0121	chrII	+	306288	306696	CUTs	CUT011	CUT011	573	406	191	649	538.13	203.377	409	-4.1849	0.0152238	-4.74417	0.00870229	1.31572	0.497253	2.64598	1.7494	86.4254	57.1405	1.51251
122	ST0122	chrII	+	306696	307104	CUTs	CUT012	CUT012	65	546	31	713	61.0444	33.0088	409	-4.65814	0.00948411	-4.99968	0.0067401	0.149253	0.080706	1.84934	1.40712	15.7371	11.974	1.31427
124	ST0124	chrII	+	310632	310952	CUTs	CUT013	CUT013	126	146	70	282	118.332	74.5359	321	-5.02076	0.0065995	-5.10142	0.00608807	0.368636	0.232199	1.58759	1.08401	55.8581	38.1401	1.46455
128	ST0128	chrII	+	324512	325360	CUTs	CUT014	CUT014	315	223	23	329	295.83	24.4904	849	-4.41999	0.0120344	-4.33066	0.0131589	0.348446	0.0288461	12.0795	0.914541	28.9542	2.19214	13.2082
129	ST0129	chrII	+	326296	326776	CUTs	CUT015	CUT015	707	51	878	96	663.975	934.894	481	-4.66947	0.00937727	-2.2017	0.110614	1.38041	1.94365	0.710214	0.0847743	147.208	17.5713	8.37771
132	ST0132	chrII	+	339600	339944	CUTs	CUT016	CUT016	117	56	481	385	109.88	512.168	345	-3.74383	0.0236632	-3.55817	0.028491	0.318492	1.48455	0.214539	0.830552	13.4594	52.1058	0.258309
133	ST0133	chrII	+	341016	342576	CUTs	CUT017	CUT017	1073	591	662	523	1007.7	704.897	1561	-4.11202	0.0163747	-4.23416	0.014492	0.645549	0.451568	1.42957	1.12992	39.4235	31.1598	1.2652
137	ST0137	chrII	+	360616	360968	CUTs	CUT018	CUT018	123	80	31	60	115.515	33.0088	353	-4.72944	0.00883138	-4.97249	0.00692587	0.327237	0.0935093	3.49952	1.27513	37.0539	13.5015	2.74444
139	ST0139	chrII	+	365896	366655	CUTs	CUT019	CUT019	479	533	136	675	449.85	144.813	760	-4.33839	0.0130576	-4.70974	0.00900708	0.591908	0.190543	3.10643	1.4497	45.3306	21.1548	2.1428
140	ST0140	chrII	+	370071	370543	CUTs	CUT020	CUT020	106	155	105	106	99.5493	111.804	473	-4.21649	0.0147504	-4.5308	0.0107721	0.210464	0.236372	0.890392	1.36932	14.2683	21.9431	0.650244
143	ST0143	chrII	+	376375	376831	CUTs	CUT021	CUT021	915	730	149	525	859.317	158.655	457	-3.96047	0.0190541	-5.04944	0.00641292	1.88034	0.347166	5.41626	2.9712	98.6847	54.1355	1.82292
144	ST0144	chrII	+	379151	379447	CUTs	CUT022	CUT022	347	107	217	131	325.883	231.061	297	-4.09752	0.0166138	-4.94864	0.00709302	1.09725	0.777985	1.41037	2.34227	66.0444	109.683	0.602139
146	ST0146	chrII	+	381375	381639	CUTs	CUT023	CUT023	368	3	201	17	345.605	214.025	265	-4.3313	0.0131505	-4.64747	0.00958584	1.30417	0.80764	1.61479	1.37186	99.173	84.2534	1.17708
154	ST0154	chrII	+	423511	423743	CUTs	CUT024	CUT024	457	3	133	5	429.189	141.618	233	-2.45637	0.0857455	-1.78272	0.168179	1.84201	0.607804	3.0306	0.509845	21.4823	3.61402	5.94416
156	ST0156	chrII	+	429663	431775	CUTs	CUT025	CUT025	464	891	264	861	435.763	281.107	2113	-2.31449	0.0988168	-4.02256	0.0179071	0.206229	0.133037	1.55017	5.51829	2.08699	7.42926	0.280915
172	ST0172	chrII	+	483728	484024	CUTs	CUT026	CUT026	365	247	56	323	342.788	59.6288	297	-4.43177	0.0118934	-4.59173	0.0101353	1.15417	0.20077	5.7487	1.17347	97.0427	19.8091	4.89891
174	ST0174	chrII	+	493088	493680	CUTs	CUT027	CUT027	542	64	338	398	509.016	359.902	593	-3.34847	0.0351382	-4.10607	0.0164724	0.858375	0.606918	1.41432	2.13316	24.4285	36.8445	0.663016
199	ST0199	chrII	+	571440	572000	CUTs	CUT028	CUT028	440	255	140	325	413.223	149.072	561	-4.67583	0.00931778	-4.95691	0.00703462	0.736584	0.265725	2.77197	1.32456	79.0514	37.7739	2.09275
201	ST0201	chrII	+	576344	576768	CUTs	CUT029	CUT029	217	130	197	121	203.794	209.765	425	-4.73499	0.00878251	-5.04751	0.00642532	0.479516	0.493566	0.971534	1.36686	54.599	76.8157	0.710778
212	ST0212	chrII	+	614424	614880	CUTs	CUT030	CUT030	1557	636	496	186	1462.25	528.14	457	-2.83905	0.0584813	-3.58603	0.0277082	3.19967	1.15567	2.76867	2.11061	54.7127	41.7085	1.31179
216	ST0216	chrII	+	625304	625688	CUTs	CUT031	CUT031	90	40	184	40	84.523	195.923	385	-4.7378	0.00875785	-4.50165	0.0110907	0.21954	0.508891	0.431409	0.789659	25.0678	45.8846	0.546323
226	ST0226	chrII	+	655424	655776	CUTs	CUT032	CUT032	41	62	32	88	38.5049	34.0736	353	-2.09804	0.122696	-2.44879	0.086398	0.109079	0.0965257	1.13005	1.42013	0.889016	1.11722	0.795738
228	ST0228	chrII	+	662888	663176	CUTs	CUT033	CUT033	64	135	359	52	60.1052	382.263	289	-3.38554	0.0338592	-4.92357	0.00727312	0.207977	1.32271	0.157235	4.65539	6.14239	181.863	0.0337749
232	ST0232	chrII	+	682208	682528	CUTs	CUT034	CUT034	227	106	26	87	213.186	27.6848	321	-4.81292	0.00812408	-4.98952	0.00680891	0.66413	0.0862454	7.70047	1.19315	81.7483	12.6666	6.45387
238	ST0238	chrII	+	698440	698768	CUTs	CUT035	CUT035	226	71	128	124	212.247	136.294	329	-2.4048	0.0902836	-4.55842	0.0104786	0.645126	0.414268	1.55727	8.61604	7.14555	39.5349	0.180741
240	ST0240	chrII	+	707024	707312	CUTs	CUT036	CUT036	111	40	54	20	104.245	57.4992	289	-4.74728	0.00867523	-4.64056	0.00965234	0.360709	0.198959	1.81298	0.89877	41.5792	20.6125	2.01718
243	ST0243	chrII	+	714680	715472	CUTs	CUT037	CUT037	353	759	36	275	331.518	38.3328	793	-3.47012	0.0311132	-4.79876	0.00823992	0.418055	0.0483389	8.64842	3.77591	13.4366	5.86643	2.29042
251	ST0251	chrII	+	734824	736184	CUTs	CUT038	CUT038	382	2388	238	1994	358.753	253.422	1361	-4.66248	0.00944297	-4.96349	0.00698846	0.263595	0.186203	1.41563	1.35122	27.9144	26.6443	1.04767
268	ST0268	chrII	+	785048	785368	CUTs	CUT039	CUT039	157	108	95	86	147.446	101.156	321	-4.78484	0.00835547	-4.41113	0.0121414	0.459332	0.315127	1.45761	0.688181	54.9738	25.9548	2.11806
60	ST0060	chrII	+	88041	88393	other	snR56	SNR56	15897	836	21741	287	14929.6	23149.8	353	-1.69195	0.18416	-2.72977	0.0652344	42.2934	65.5802	0.644912	2.82305	229.656	1005.3	0.228445
54	ST0054	chrII	+	46785	47129	SUTs	SUT005	SUT005	285	226	188	832	267.656	200.182	345	-2.78853	0.0615113	-1.62761	0.196398	0.775815	0.580238	1.33706	0.313197	12.6126	2.9544	4.26908
81	ST0081	chrII	+	164471	165007	SUTs	SUT006	SUT006	257	414	1259	938	241.36	1340.58	537	-4.02342	0.0178917	-3.19777	0.0408532	0.44946	2.49643	0.180041	0.43795	25.1212	61.1072	0.4111
91	ST0091	chrII	+	196311	196735	SUTs	SUT007	SUT007	10	2	56	4	9.39144	59.6288	425	-3.73562	0.0238584	-0.019926	0.980271	0.0220975	0.140303	0.157499	0.0243386	0.926193	0.143127	6.47114
101	ST0101	chrII	+	238400	238896	SUTs	SUT008	SUT008	114	25	83	127	107.062	88.3783	497	-2.13055	0.118772	-2.01946	0.132727	0.215417	0.177824	1.21141	0.89486	1.8137	1.33977	1.35374
102	ST0102	chrII	+	241688	242792	SUTs	SUT009	SUT009	53	2350	814	1285	49.7746	866.747	1105	-4.24694	0.0143079	-1.17391	0.309155	0.0450449	0.784386	0.057427	0.0462807	3.14825	2.53719	1.24084
106	ST0106	chrII	+	251616	252104	SUTs	SUT010	SUT010	214	6	112	9	200.977	119.258	489	-1.67451	0.1874	-3.18828	0.0412429	0.410996	0.24388	1.68523	4.54382	2.19314	5.91327	0.370885
107	ST0107	chrII	+	254640	254872	SUTs	SUT011	SUT011	58	469	12	190	54.4704	12.7776	233	-1.32443	0.265956	-3.49799	0.0302581	0.233778	0.0548394	4.26296	8.78958	0.879012	1.81239	0.485001
110	ST0110	chrII	+	269792	270208	SUTs	SUT012	SUT012	24	12	15	13	22.5395	15.972	417	-3.8676	0.0209086	-4.29792	0.0135969	0.0540515	0.0383021	1.41119	1.53775	2.58513	2.81698	0.917695
112	ST0112	chrII	+	276760	278816	SUTs	SUT013	SUT013	621	23	581	19464	583.209	618.648	2057	-1.90373	0.149012	-3.91362	0.0199681	0.283524	0.300753	0.942714	7.46249	1.9027	15.0617	0.126327
138	ST0138	chrII	+	362864	364592	SUTs	SUT014	SUT014	1270	53	487	43	1192.71	518.557	1729	-0.349982	0.704701	-0.5267	0.59055	0.689828	0.299917	2.30006	1.1933	0.978895	0.507861	1.92749
141	ST0141	chrII	+	370543	370871	SUTs	SUT015	SUT015	82	248	62	104	77.0098	66.0175	329	-1.00921	0.364508	-0.821107	0.439944	0.234072	0.200661	1.16651	0.828532	0.64216	0.456106	1.40792
142	ST0142	chrII	+	371271	373727	SUTs	SUT016	SUT016	823	3338	367	11650	772.916	390.781	2457	-2.31777	0.0984926	-4.4127	0.0121224	0.314577	0.159048	1.97787	8.12482	3.19392	13.1202	0.243436
164	ST0164	chrII	+	453551	454695	SUTs	SUT017	SUT017	240	499	120	460	225.395	127.776	1145	-2.45253	0.0860751	-2.91498	0.0542053	0.196851	0.111595	1.76398	1.58795	2.28697	2.05874	1.11086
169	ST0169	chrII	+	474280	476888	SUTs	SUT018	SUT018	1112	64	516	786	1044.33	549.436	2609	-2.94858	0.0524139	-3.81306	0.0220806	0.400279	0.210593	1.90073	2.37375	7.63689	9.53746	0.800726
182	ST0182	chrII	+	532512	533192	SUTs	SUT019	SUT019	219	210	191	223	205.673	203.377	681	-3.28277	0.037524	-2.00736	0.134342	0.302016	0.298644	1.01129	0.279317	8.04859	2.22301	3.62058
191	ST0191	chrII	+	553472	556200	SUTs	SUT020	SUT020	587	1542	819	2140	551.278	872.071	2729	-3.00963	0.0493101	-4.11418	0.0163393	0.202007	0.319557	0.632148	3.01788	4.09667	19.5575	0.209468
237	ST0237	chrII	+	697840	698440	SUTs	SUT021	SUT021	780	131	315	144	732.533	335.412	601	-2.04497	0.129384	-3.46017	0.0314243	1.21886	0.558089	2.18398	4.11733	9.42045	17.7598	0.530436
256	ST0256	chrII	+	741824	742000	SUTs	SUT022	SUT022	71	85	70	251	66.6792	74.5359	177	-4.46421	0.0115138	-2.35992	0.0944278	0.376719	0.421107	0.894592	0.121932	32.719	4.45956	7.33681
269	ST0269	chrII	+	785448	786472	SUTs	SUT023	SUT023	487	260	311	209	457.363	331.153	1025	-2.40847	0.089953	-2.58028	0.0757525	0.446208	0.323076	1.38113	1.18746	4.96046	4.26488	1.16309
272	ST0272	chrII	+	798992	800424	SUTs	SUT024	SUT024	128	76	711	1244	120.21	757.072	1433	-4.93862	0.00716446	-0.964732	0.381085	0.0838873	0.528313	0.158783	0.0188001	11.7088	1.38634	8.44586
123	ST0123	chrII	+	307568	308896	other	TLC1	TLC1	2936	164	1975	164	2757.33	2102.98	1329	0.955115	2.59897	0.307616	1.36018	2.07474	1.58238	1.31115	1.91076	0.798292	1.16336	0.686196
99	ST0099	chrII	+	236056	237152	ORF-T	YBL002W	HTB2	4502	196	3351	960	4228.03	3568.14	1097	2.42101	11.2572	2.19319	8.96376	3.85417	3.25264	1.18494	1.25585	0.342375	0.362865	0.943532
98	ST0098	chrII	+	227528	235216	ORF-T	YBL004W	UTP20	4506	664	782	662	4231.78	832.673	7689	-0.032439	0.968081	-1.13796	0.320473	0.550369	0.108294	5.08217	3.02079	0.568515	0.337919	1.6824
97	ST0097	chrII	+	217408	220984	other	YBL005W, YBLWdelta8	PDR3, YBLWdelta8	730	1411	601	494	685.575	639.944	3577	-0.924531	0.396718	-0.646569	0.52384	0.191662	0.178905	1.0713	0.757326	0.48312	0.341527	1.41459
96	ST0096	chrII	+	216704	217256	other	YBL006W-A	YBL006W-A	69	1291	62	1007	64.801	66.0175	553	-3.0514	0.0472927	-2.85905	0.0573234	0.117181	0.119381	0.981572	0.825016	2.47778	2.08258	1.18976
95	ST0095	chrII	+	209568	212224	other	YBL008W-A, YBL008W	YBL008W-A, HIR1	653	27	379	72	613.261	403.559	2657	-1.21418	0.296953	-1.3493	0.259422	0.23081	0.151885	1.51963	1.14467	0.77726	0.585475	1.32757
94	ST0094	chrII	+	207160	209312	ORF-T	YBL009W	ALK2	1294	59	604	66	1215.25	643.139	2153	-0.669319	0.512057	-1.36401	0.255633	0.564446	0.298717	1.88957	2.00309	1.10231	1.16854	0.943324
93	ST0093	chrII	+	203440	205952	ORF-T	YBL011W	SCT1	1744	79	1657	55	1637.87	1764.37	2513	0.0590591	1.06084	-0.381869	0.682585	0.651758	0.702098	0.9283	1.55415	0.61438	1.02859	0.597305
92	ST0092	chrII	+	202015	203440	ORF-T	YBL013W	FMT1	393	101	650	159	369.084	692.119	1426	-3.16306	0.0422962	-2.5692	0.0765972	0.258824	0.485357	0.533266	0.552191	6.11933	6.33649	0.965728
90	ST0090	chrII	+	194031	195863	ORF-T	YBL015W	ACH1	423	17	3327	24	397.258	3542.59	1833	-0.351152	0.703877	1.66877	5.30564	0.216726	1.93267	0.112138	0.132666	0.307903	0.364267	0.845265
88	ST0088	chrII	+	184263	185975	ORF-T	YBL019W	APN2	381	171	658	146	357.814	700.638	1713	-0.842926	0.430449	-0.22998	0.79455	0.208881	0.409012	0.510697	0.541753	0.485264	0.514772	0.942677
87	ST0087	chrII	+	182335	184207	ORF-T	YBL020W	RFT1	1093	27	635	57	1026.48	676.147	1873	-0.28279	0.753678	-0.380654	0.683414	0.548043	0.360997	1.51814	1.10281	0.727158	0.528226	1.37661
86	ST0086	chrII	+	172503	174687	ORF-T	YBL024W	NCL1	2326	17	701	33	2184.45	746.424	2185	0.766708	2.15267	-0.0372685	0.963417	0.999748	0.341613	2.92655	2.23441	0.464423	0.354585	1.30977
85	ST0085	chrII	+	171423	172207	ORF-T	YBL025W	RRN10	717	27	767	30	673.366	816.701	785	-0.169325	0.844234	0.302306	1.35298	0.857792	1.04038	0.824496	0.623984	1.01606	0.76896	1.32134
84	ST0084	chrII	+	170551	171135	ORF-T	YBL026W	LSM2	878	137	688	138	824.569	732.582	585	1.52258	4.58402	1.81493	6.14067	1.40952	1.25228	1.12557	0.746501	0.307485	0.203932	1.50779
83	ST0083	chrII	+	168375	169511	ORF-T	YBL027W	RPL19B	8470	68	2095	100	7954.55	2230.75	1137	-1.79163	0.166689	-2.668	0.0693911	6.99609	1.96197	3.56586	2.40216	41.9709	28.274	1.48444
82	ST0082	chrII	+	166095	167359	ORF-T	YBL029W	YBL029W	458	575	116	783	430.128	123.517	1265	-0.515364	0.597283	-3.34171	0.0353765	0.340022	0.0976417	3.48235	16.8836	0.569281	2.76007	0.206256
80	ST0080	chrII	+	161679	162783	ORF-T	YBL031W	SHE1	366	190	263	952	343.727	280.042	1105	-0.954307	0.385079	-1.86517	0.15487	0.311065	0.253432	1.22741	2.48647	0.807795	1.63642	0.493635
79	ST0079	chrII	+	160103	161447	ORF-T	YBL032W	HEK2	1284	188	1014	79	1205.86	1079.71	1345	1.26251	3.5343	0.403795	1.4975	0.896551	0.802756	1.11684	2.36013	0.253672	0.536065	0.473211
78	ST0078	chrII	+	147119	150383	ORF-T	YBL037W	APL3	829	109	1189	86	778.551	1266.05	3265	-0.726544	0.483577	-0.261796	0.769668	0.238453	0.387763	0.614946	0.628293	0.493103	0.503806	0.978757
77	ST0077	chrII	+	146119	146903	ORF-T	YBL038W	MRPL16	1107	140	1251	211	1039.63	1332.06	785	0.987278	2.68392	1.92341	6.84425	1.32437	1.6969	0.780468	0.392143	0.493447	0.24793	1.99027
76	ST0076	chrII	+	143103	143647	ORF-T	YBL039W-B	YBL039W-B	283	31	603	35	265.778	642.074	545	0.255911	1.29164	1.31265	3.71602	0.487666	1.17812	0.413936	0.347586	0.377556	0.317037	1.19089
75	ST0075	chrII	+	140991	142119	ORF-T	YBL041W	PRE7	2802	144	2626	112	2631.48	2796.16	1129	1.85707	6.40497	1.91518	6.78819	2.33081	2.47667	0.941105	0.943547	0.363906	0.36485	0.997412
74	ST0074	chrII	+	136567	137599	ORF-T	YBL043W	ECM13	71	44	829	22	66.6792	882.719	1033	-1.51077	0.22074	0.595491	1.81392	0.0645491	0.854519	0.0755385	0.121692	0.292422	0.471089	0.620735
73	ST0073	chrII	+	132423	133871	ORF-T	YBL046W	PSY4	649	49	404	299	609.505	430.179	1449	-0.46322	0.629254	-0.276112	0.758728	0.420638	0.29688	1.41686	0.829354	0.668471	0.391286	1.70839
72	ST0072	chrII	+	126607	127663	other	YBL049W, YBL048W	MOH1, YBL048W	33	392	1004	183	30.9918	1069.06	1057	-2.13657	0.118059	1.88216	6.56771	0.0293205	1.01141	0.0289898	0.0179757	0.248354	0.153997	1.61272
71	ST0071	chrII	+	125055	126191	ORF-T	YBL050W	SEC17	1345	54	1684	61	1263.15	1793.12	1137	1.52348	4.58815	1.68643	5.40018	1.11095	1.57706	0.704441	0.84963	0.242134	0.292039	0.829116
70	ST0070	chrII	+	117487	119367	other	YBL054W, YBL053W	YBL054W, YBL053W	1366	48	110	125	1282.87	117.128	1881	-0.741177	0.476553	-0.515985	0.596912	0.682015	0.062269	10.9527	0.798363	1.43114	0.104318	13.719
69	ST0069	chrII	+	113639	115559	ORF-T	YBL056W	PTC3	2610	185	2780	64	2451.17	2960.14	1921	1.833	6.25264	1.7224	5.59796	1.27598	1.54094	0.828057	1.11695	0.204071	0.275268	0.741356
68	ST0068	chrII	+	111407	112823	ORF-T	YBL058W	SHP1	2359	246	2631	125	2215.44	2801.49	1417	1.39142	4.02056	1.69654	5.45504	1.56347	1.97705	0.790809	0.737036	0.388869	0.362427	1.07296
67	ST0067	chrII	+	110679	111407	ORF-T	YBL059W	YBL059W	421	103	737	49	395.38	784.757	729	-1.02615	0.358384	0.37692	1.45779	0.542359	1.07648	0.503824	0.245841	1.51335	0.738437	2.04939
66	ST0066	chrII	+	107687	109991	ORF-T	YBL060W	YEL1	754	74	480	159	708.115	511.104	2305	-1.35137	0.258884	-0.695345	0.498903	0.307208	0.221737	1.38546	0.518907	1.18666	0.444449	2.66996
65	ST0065	chrII	+	101871	105223	ORF-T	YBL063W	KIP1	736	51	646	55	691.21	687.86	3353	-0.662074	0.515781	-1.34284	0.261104	0.206147	0.205148	1.00487	1.97538	0.399679	0.785692	0.508697
63	ST0063	chrII	+	92345	93577	ORF-T	YBL068W	PRS4	1056	95	362	113	991.736	385.457	1233	0.770698	2.16127	0.295001	1.34313	0.804328	0.312617	2.57288	1.60914	0.372154	0.232753	1.59892
62	ST0062	chrII	+	90665	92121	ORF-T	YBL069W, YBL068W-A	AST1, YBL068W-A	788	472	305	122	740.046	324.764	1457	0.467893	1.59663	-1.34981	0.259289	0.507924	0.222899	2.27872	6.15772	0.318123	0.859656	0.370059
61	ST0061	chrII	+	89945	90465	ORF-T	YBL071W-A	KTI11	719	108	308	54	675.245	327.958	521	-0.425562	0.653402	0.412048	1.50991	1.29606	0.629478	2.05894	0.432743	1.98355	0.416899	4.75787
59	ST0059	chrII	+	75185	79825	ORF-T	YBL079W	NUP170	2487	39	1437	115	2335.65	1530.12	4641	0.00317862	1.00318	0.0233679	1.02364	0.503265	0.329695	1.52645	0.980013	0.501668	0.32208	1.55758
58	ST0058	chrII	+	71561	73057	ORF-T	YBL081W	YBL081W	1382	44	186	80	1297.9	198.053	1497	0.149063	1.16075	-1.36925	0.254297	0.866999	0.1323	6.55329	4.56453	0.746932	0.520257	1.4357
57	ST0057	chrII	+	63537	66921	ORF-T	YBL085W	BOI1	1463	23	1190	60	1373.97	1267.11	3385	0.637511	1.89177	-0.304938	0.737169	0.405899	0.374331	1.08433	2.56626	0.214561	0.507796	0.422534
56	ST0056	chrII	+	49545	51025	ORF-T	YBL089W	AVT5	1049	91	808	92	985.162	860.358	1481	-0.682441	0.505382	-0.821222	0.439894	0.665201	0.58093	1.14506	1.14887	1.31623	1.32062	0.996682
55	ST0055	chrII	+	48777	49425	ORF-T	YBL090W	MRP21	585	222	494	164	549.399	526.011	649	0.958613	2.60808	1.18247	3.26242	0.846532	0.810494	1.04446	0.799429	0.324581	0.248433	1.30651
53	ST0053	chrII	+	45545	46481	ORF-T	YBL092W	RPL32	10763	53	2381	173	10108	2535.29	937	3.15724	23.5057	2.59614	13.4119	10.7876	2.70575	3.98693	1.7526	0.458937	0.201742	2.27487
52	ST0052	chrII	+	43145	44201	ORF-T	YBL095W	YBL095W	808	163	609	107	758.829	648.463	1057	-0.212764	0.808347	-0.413989	0.661008	0.717908	0.613494	1.1702	1.2229	0.888119	0.928118	0.956903
51	ST0051	chrII	+	40785	43145	ORF-T	YBL097W	BRN1	724	176	552	50	679.94	587.769	2361	-1.08179	0.338989	-1.61494	0.198902	0.287988	0.248949	1.15682	1.7043	0.84955	1.25162	0.678762
50	ST0050	chrII	+	39121	40561	ORF-T	YBL098W	BNA4	357	101	244	53	335.274	259.811	1441	0.589727	1.8035	0.193131	1.21304	0.232668	0.180299	1.29046	1.48675	0.129009	0.148634	0.867968
49	ST0049	chrII	+	36729	38929	ORF-T	YBL099W	ATP1	2965	17	15930	37	2784.56	16962.3	2201	1.65019	5.20795	2.3446	10.4291	1.26514	7.70661	0.164162	0.499367	0.242924	0.738952	0.328741
48	ST0048	chrII	+	23993	24889	ORF-T	YBL102W	SFT2	731	78	1063	164	686.514	1131.88	897	1.01179	2.75053	1.16759	3.21423	0.765345	1.26185	0.606525	0.855734	0.278254	0.392583	0.708777
103	ST0103	chrII	+	242792	244360	ORF-T	YBR003W	COQ1	706	71	971	42	663.036	1033.92	1569	0.276304	1.31825	0.126403	1.13474	0.422585	0.658967	0.641284	1.16172	0.320566	0.580721	0.552013
104	ST0104	chrII	+	245832	246672	ORF-T	YBR005W	RCR1	2174	105	561	96	2041.7	597.352	841	1.08509	2.9597	0.422447	1.52569	2.4277	0.710288	3.41792	1.93991	0.820255	0.465552	1.7619
105	ST0105	chrII	+	246768	248600	ORF-T	YBR006W	UGA2	410	297	1011	275	385.049	1076.51	1833	0.45053	1.56914	0.754585	2.12673	0.210065	0.587295	0.357682	0.73782	0.133872	0.27615	0.484782
109	ST0109	chrII	+	256304	256896	ORF-T	YBR010W	HHT1	6200	112	4612	76	5822.69	4910.85	593	2.99943	20.0741	2.81918	16.7632	9.81905	8.28137	1.18568	1.19751	0.48914	0.494022	0.990118
111	ST0111	chrII	+	270208	270880	ORF-T	YBR016W	YBR016W	1295	177	1425	288	1216.19	1517.34	673	1.28848	3.62726	1.83848	6.28695	1.80712	2.25459	0.801529	0.576951	0.498205	0.358614	1.38925
113	ST0113	chrII	+	278856	281304	ORF-T	YBR020W	GAL1	139	186	21288	161	130.541	22667.4	2449	-2.91403	0.0542568	3.15839	23.5328	0.0533038	9.2558	0.00575897	0.00230559	0.982435	0.393315	2.49783
114	ST0114	chrII	+	281344	283512	ORF-T	YBR021W	FUR4	392	176	301	624	368.145	320.505	2169	-2.25314	0.105069	-2.13077	0.118746	0.16973	0.147766	1.14864	0.884823	1.61542	1.24439	1.29816
115	ST0115	chrII	+	283664	284392	ORF-T	YBR022W	POA1	414	166	589	112	388.806	627.167	729	0.905336	2.47276	0.990934	2.69375	0.533341	0.860311	0.61994	0.917964	0.215686	0.319373	0.675343
116	ST0116	chrII	+	289344	290560	ORF-T	YBR024W	SCO2	319	571	654	145	299.587	696.379	1217	-0.156121	0.855456	0.640791	1.89798	0.246168	0.572209	0.430207	0.450719	0.287763	0.301483	0.954491
118	ST0118	chrII	+	298016	300016	ORF-T	YBR030W	YBR030W	928	224	561	67	871.526	597.352	2001	-0.940895	0.390279	-1.22445	0.293918	0.435545	0.298527	1.45898	1.32785	1.11599	1.01568	1.09876
119	ST0119	chrII	+	300104	301392	ORF-T	YBR031W	RPL4A	1856	14	502	337	1743.05	534.529	1289	2.94247	18.9626	1.87553	6.52428	1.35225	0.414685	3.26091	2.90648	0.0713113	0.0635603	1.12195
120	ST0120	chrII	+	301808	304840	other	YBR032W, YBR033W	YBR032W, EDS1	81	670	1784	237	76.0707	1899.6	3033	-4.55397	0.0105254	0.0263719	1.02672	0.025081	0.626311	0.0400456	0.0102514	2.38291	0.61001	3.90635
125	ST0125	chrII	+	311832	314960	ORF-T	YBR038W	CHS2	1403	36	1496	108	1317.62	1592.94	3129	-0.649907	0.522095	-0.600622	0.548471	0.421099	0.509089	0.827162	0.95191	0.806557	0.928198	0.86895
126	ST0126	chrII	+	315496	316656	ORF-T	YBR039W	ATP3	1544	53	7012	18	1450.04	7466.37	1161	1.87752	6.53724	2.61315	13.6419	1.24896	6.43098	0.194209	0.479203	0.191053	0.471414	0.405275
127	ST0127	chrII	+	318200	320360	ORF-T	YBR041W	FAT1	1333	97	1206	119	1251.88	1284.15	2161	0.534669	1.70688	-0.470457	0.624717	0.579306	0.594238	0.974872	2.73225	0.339394	0.951212	0.356801
130	ST0130	chrII	+	331784	332424	ORF-T	YBR047W	FMP23	64	51	169	97	60.1052	179.951	641	-1.72175	0.178752	0.23136	1.26031	0.0937679	0.280735	0.334009	0.141832	0.524569	0.22275	2.35497
131	ST0131	chrII	+	332736	334040	ORF-T	YBR048W	RPS11B	6545	31	1036	52	6146.7	1103.13	1305	-0.919774	0.398609	-1.83717	0.159267	4.71011	0.845312	5.57204	2.50277	11.8164	5.3075	2.22635
134	ST0134	chrII	+	342576	344584	ORF-T	YBR054W	YRO2	362	490	1769	315	339.97	1883.63	2009	2.11004	8.24858	2.2384	9.37831	0.169224	0.937596	0.180487	0.879538	0.0205155	0.0999749	0.205206
135	ST0135	chrII	+	347816	349456	ORF-T	YBR056W	YBR056W	710	43	1874	24	666.792	1995.43	1641	1.3435	3.83242	1.67332	5.32981	0.406333	1.21599	0.334159	0.719054	0.106025	0.228148	0.46472
136	ST0136	chrII	+	351064	352016	other	YBR056W-A	YBR056W-A	1586	229	323	170	1489.48	343.93	953	2.12399	8.36449	0.222523	1.24922	1.56294	0.360892	4.33077	6.69574	0.186854	0.288893	0.646795
145	ST0145	chrII	+	380239	381375	ORF-T	YBR071W	YBR071W	1028	173	891	566	965.44	948.736	1137	0.693108	1.99992	1.2268	3.41028	0.849112	0.83442	1.01761	0.586438	0.424573	0.244678	1.73523
147	ST0147	chrII	+	381943	382799	ORF-T	YBR072W	HSP26	38	270	1409	98	35.6875	1500.3	857	-0.545248	0.579698	2.78941	16.2713	0.0416423	1.75064	0.0237869	0.0356269	0.0718346	0.107591	0.667666
148	ST0148	chrII	+	383135	385991	ORF-T	YBR073W	RDH54	1147	83	586	38	1077.2	623.972	2857	0.0491524	1.05038	-0.978343	0.375933	0.377038	0.218401	1.72636	2.79406	0.358954	0.580957	0.617867
149	ST0149	chrII	+	386271	389303	ORF-T	YBR074W	YBR074W	1682	15	784	39	1579.64	834.803	3033	0.49464	1.63991	-0.494957	0.609597	0.520818	0.27524	1.89223	2.69015	0.31759	0.451511	0.703393
150	ST0150	chrII	+	392943	395295	ORF-T	YBR078W	ECM33	13944	275	8579	167	13095.4	9134.91	2353	2.5906	13.3378	2.26397	9.62117	5.56542	3.88224	1.43356	1.3863	0.417267	0.40351	1.03409
151	ST0151	chrII	+	407335	410687	ORF-T	YBR083W	TEC1	1944	1076	2356	422	1825.7	2508.67	3353	-0.894757	0.408707	-0.158684	0.853266	0.544496	0.748186	0.727756	0.478991	1.33224	0.87685	1.51935
152	ST0152	chrII	+	410975	414143	ORF-T	YBR084W	MIS1	3292	1657	408	628	3091.66	434.438	3169	1.48498	4.4149	-0.308841	0.734298	0.975596	0.13709	7.11646	6.01241	0.220978	0.186695	1.18363
153	ST0153	chrII	+	415871	417183	ORF-T	YBR085W	AAC3	524	30	56	65	492.112	59.6288	1313	-1.05896	0.346815	-4.44256	0.0117658	0.374799	0.0454141	8.25292	29.4766	1.08069	3.85984	0.279982
155	ST0155	chrII	+	423743	424879	ORF-T	YBR087W	RFC5	1201	68	596	53	1127.91	634.62	1137	0.583526	1.79235	-0.26623	0.766263	0.992007	0.558153	1.7773	2.33908	0.553468	0.72841	0.759831
157	ST0157	chrII	+	431975	434391	ORF-T	YBR094W	PBY1	871	79	692	92	817.995	736.841	2417	-0.388479	0.678088	0.133493	1.14281	0.338434	0.304858	1.11014	0.593349	0.4991	0.266761	1.87097
158	ST0158	chrII	+	435935	436775	ORF-T	YBR096W	YBR096W	598	78	538	279	561.608	572.862	841	1.80999	6.11038	0.455345	1.57672	0.667786	0.681168	0.980355	3.87538	0.109287	0.432016	0.25297
159	ST0159	chrII	+	436903	441287	ORF-T	YBR097W	VPS15	775	200	914	83	727.837	973.226	4385	-1.61589	0.198713	-1.23523	0.290768	0.165983	0.221944	0.74786	0.683407	0.835291	0.763303	1.09431
160	ST0160	chrII	+	441495	443743	ORF-T	YBR098W	MMS4	364	254	385	155	341.849	409.948	2249	-2.0677	0.126477	-2.17801	0.113267	0.152	0.18228	0.833883	1.11663	1.2018	1.60929	0.746788
161	ST0161	chrII	+	447551	449319	ORF-T	YBR103W	SIF2	619	374	853	51	581.33	908.274	1769	0.227852	1.2559	0.427812	1.5339	0.328621	0.513439	0.640039	0.818763	0.261662	0.334728	0.781714
162	ST0162	chrII	+	449575	450759	ORF-T	YBR104W	YMC2	1360	77	228	146	1277.24	242.774	1185	0.742764	2.10174	-1.76845	0.170596	1.07784	0.204873	5.261	12.3199	0.512831	1.20092	0.427032
163	ST0163	chrII	+	452575	453511	ORF-T	YBR106W	PHO88	5087	196	1146	114	4777.43	1220.26	937	2.5415	12.6987	1.93505	6.92436	5.09864	1.30231	3.91509	1.83391	0.40151	0.188076	2.13483
165	ST0165	chrII	+	454807	457824	ORF-T	YBR108W	YBR108W	451	334	893	430	423.554	950.866	3018	-0.851811	0.426642	-0.441762	0.642902	0.140343	0.315065	0.44544	0.663618	0.328947	0.490066	0.67123
166	ST0166	chrII	+	458664	460304	other	YBR109W-A, YBR110W	YBR109W-A, ALG1	766	12	727	22	719.384	774.109	1641	0.598105	1.81867	0.609464	1.83944	0.438382	0.47173	0.929306	0.988706	0.241045	0.256452	0.939922
167	ST0167	chrII	+	462104	462720	ORF-T	YBR111W-A	SUS1	353	119	530	134	331.518	564.344	617	1.11736	3.05676	1.23918	3.45276	0.537306	0.914657	0.58744	0.885308	0.175776	0.264906	0.663543
168	ST0168	chrII	+	467160	469664	ORF-T	YBR114W	RAD16	1013	75	437	56	951.353	465.317	2505	-1.17277	0.309507	-1.28016	0.277993	0.379782	0.185755	2.04453	1.11336	1.22705	0.668202	1.83635
170	ST0170	chrII	+	477560	479128	ORF-T	YBR118W	TEF2	4968	3	1781	10	4665.67	1896.41	1569	1.27124	3.56527	1.88159	6.56392	2.97366	1.20867	2.46027	0.543162	0.834062	0.184139	4.52953
171	ST0171	chrII	+	479256	480440	ORF-T	YBR119W	MUD1	1120	105	811	246	1051.84	863.552	1185	-0.304576	0.737436	0.445586	1.5614	0.88763	0.728736	1.21804	0.47229	1.20367	0.466718	2.57901
173	ST0173	chrII	+	490824	491200	other	YBR126W-A, YBR126W-B	YBR126W-A, YBR126W-B	1052	709	2995	585	987.98	3189.07	377	1.64173	5.16407	1.96286	7.11963	2.62064	8.45908	0.309801	0.725329	0.507474	1.18813	0.427119
175	ST0175	chrII	+	497144	499456	ORF-T	YBR131W	CCZ1	556	21	370	215	522.164	393.976	2313	-1.91306	0.147628	-1.56182	0.209754	0.225752	0.170331	1.32537	0.703815	1.5292	0.812053	1.88313
176	ST0176	chrII	+	504760	505448	ORF-T	YBR135W	CKS1	767	21	772	25	720.324	822.025	689	0.411827	1.50957	-0.0314754	0.969015	1.04546	1.19307	0.87628	1.55784	0.692555	1.23122	0.562495
177	ST0177	chrII	+	505624	512960	ORF-T	YBR136W	MEC1	950	96	892	171	892.187	949.801	7337	-2.3531	0.0950744	-1.90307	0.149111	0.121601	0.129454	0.939341	0.63761	1.27901	0.868171	1.47322
178	ST0178	chrII	+	512960	513768	ORF-T	YBR137W	YBR137W	331	75	987	91	310.857	1050.96	809	1.14722	3.14943	1.88096	6.55982	0.384248	1.29908	0.295785	0.480109	0.122006	0.198036	0.616078
179	ST0179	chrII	+	515648	517352	ORF-T	YBR139W	YBR139W	415	70	2924	98	389.745	3113.47	1705	0.687789	1.98931	1.28238	3.60521	0.228589	1.82608	0.12518	0.551788	0.114909	0.506513	0.226863
180	ST0180	chrII	+	527144	527784	other	YBR141W-A	YBR141W-A	276	212	271	30	259.204	288.561	641	-2.25183	0.105207	-1.60479	0.200933	0.404374	0.450173	0.898265	0.523594	3.8436	2.24041	1.71558
181	ST0181	chrII	+	528240	530800	ORF-T	YBR142W	MAK5	1514	419	240	262	1421.86	255.552	2561	0.145021	1.15606	-0.575839	0.562233	0.555199	0.0997859	5.5639	2.0562	0.480249	0.177482	2.70591
183	ST0183	chrII	+	533600	534960	ORF-T	YBR145W	ADH5	988	159	944	55	927.875	1005.17	1361	0.452361	1.57202	0.781789	2.18538	0.681759	0.738553	0.923102	0.719335	0.433684	0.337952	1.28327
184	ST0184	chrII	+	535192	536288	ORF-T	YBR146W	MRPS9	1115	92	1269	415	1047.15	1351.23	1097	0.987399	2.68424	1.16066	3.19205	0.954554	1.23175	0.774957	0.840915	0.355614	0.38588	0.921565
185	ST0185	chrII	+	536456	537928	other	YBR147W, YBR148W	YBR147W, YSW1	59	10	987	14	55.4095	1050.96	1473	-2.12802	0.119073	0.953222	2.59405	0.0376168	0.71348	0.0527229	0.0459024	0.315912	0.275045	1.14859
186	ST0186	chrII	+	537928	539632	ORF-T	YBR148W	YSW1	45	145	67	361	42.2615	71.3415	1705	-2.65371	0.0703896	-2.57764	0.0759533	0.0247868	0.0418425	0.592383	0.92675	0.352137	0.550899	0.639205
187	ST0187	chrII	+	539816	541256	ORF-T	YBR149W	ARA1	678	238	4421	96	636.74	4707.48	1441	1.78378	5.95234	2.47434	11.8738	0.441874	3.26681	0.135261	0.501299	0.0742353	0.275127	0.269822
188	ST0188	chrII	+	544880	546168	ORF-T	YBR151W	APD1	923	196	1644	23	866.83	1750.53	1289	1.73223	5.65322	1.71193	5.53966	0.672483	1.35805	0.495182	1.0205	0.118956	0.245151	0.485235
189	ST0189	chrII	+	546312	548360	ORF-T	YBR152W, YBR153W	SPP381, RIB7	1269	546	724	341	1191.77	770.915	2049	-0.811214	0.444318	-0.293809	0.745419	0.581637	0.376239	1.54592	0.596065	1.30905	0.504735	2.59355
190	ST0190	chrII	+	549704	551040	ORF-T	YBR155W	CNS1	848	35	169	54	796.394	179.951	1337	-0.340498	0.711416	-1.2194	0.295409	0.595658	0.134593	4.42562	2.40824	0.837285	0.455617	1.83769
192	ST0192	chrII	+	556280	558336	ORF-T	YBR158W	AMN1	4009	50	2568	69	3765.03	2734.4	2057	1.55373	4.72908	1.32247	3.75269	1.83035	1.32932	1.37691	1.26018	0.387041	0.35423	1.09263
193	ST0193	chrII	+	558632	559848	ORF-T	YBR159W	IFA38	1527	91	1050	26	1434.07	1118.04	1217	1.95614	7.07196	0.92099	2.51178	1.17837	0.918685	1.28267	2.81552	0.166625	0.365751	0.45557
194	ST0194	chrII	+	559960	561056	ORF-T	YBR160W	CDC28	963	39	825	83	904.396	878.459	1097	0.492034	1.63564	-0.1021	0.90294	0.824427	0.800783	1.02953	1.81146	0.504039	0.886863	0.568339
195	ST0195	chrII	+	561488	562912	ORF-T	YBR161W	CSH1	679	281	790	148	637.679	841.191	1425	0.036181	1.03684	-0.768629	0.463649	0.447494	0.59031	0.758066	2.23627	0.431593	1.27318	0.338987
196	ST0196	chrII	+	565176	565520	ORF-T	YBR162W-A	YSY6	2661	95	733	58	2499.06	780.498	345	2.13801	8.48253	1.80414	6.07476	7.24366	2.26231	3.20188	1.39636	0.85395	0.372412	2.29303
197	ST0197	chrII	+	565624	567816	ORF-T	YBR163W	DEM1	1224	200	1226	198	1149.51	1305.44	2193	-0.419458	0.657403	-0.47854	0.619688	0.524174	0.595278	0.880553	1.06086	0.79734	0.960609	0.830036
198	ST0198	chrII	+	568768	569808	ORF-T	YBR165W	UBS1	904	60	737	51	848.986	784.757	1041	0.360595	1.43418	1.12303	3.07415	0.815549	0.753849	1.08185	0.466529	0.568651	0.245222	2.31892
200	ST0200	chrII	+	572000	573776	ORF-T	YBR168W	PEX32	372	63	623	155	349.362	663.37	1777	-0.13076	0.877428	0.168034	1.18298	0.196602	0.373309	0.526647	0.741712	0.224066	0.315567	0.710043
202	ST0202	chrII	+	578320	579120	ORF-T	YBR171W	SEC66	865	250	643	147	812.36	684.666	801	1.48951	4.43492	0.887502	2.42905	1.01418	0.854764	1.18651	1.82578	0.228681	0.351892	0.649862
203	ST0203	chrII	+	582384	583456	ORF-T	YBR175W	SWD3	685	79	424	36	643.314	451.475	1073	0.546233	1.72674	-1.04813	0.350594	0.599547	0.420759	1.42492	4.92517	0.347214	1.20013	0.289313
204	ST0204	chrII	+	583632	584744	ORF-T	YBR176W	ECM31	370	44	286	125	347.483	304.533	1113	-0.539214	0.583206	-0.80557	0.446833	0.312204	0.273614	1.14104	1.3052	0.535324	0.612341	0.874225
205	ST0205	chrII	+	595904	597128	ORF-T	YBR183W	YPC1	345	85	1831	15	324.005	1949.65	1225	0.406478	1.50152	0.620517	1.85989	0.264494	1.59155	0.166186	0.807317	0.176151	0.855723	0.20585
206	ST0206	chrII	+	597344	598936	ORF-T	YBR184W	YBR184W	116	43	107	62	108.941	113.934	1593	-2.63578	0.0716633	-2.79142	0.0613342	0.0683872	0.0715213	0.956178	1.16841	0.954284	1.16609	0.818361
207	ST0207	chrII	+	602504	603656	ORF-T	YBR187W	GDT1	3352	109	1115	90	3148.01	1187.25	1153	1.49104	4.44171	0.317388	1.37354	2.73028	1.02971	2.65151	3.23378	0.61469	0.749676	0.819942
208	ST0208	chrII	+	604464	605568	ORF-T	YBR189W	RPS9B	11602	35	1963	10	10896	2090.2	1105	2.58443	13.2557	1.70855	5.52095	9.86059	1.89158	5.21287	2.40099	0.743873	0.34262	2.17113
209	ST0209	chrII	+	606208	607240	other	YBR190W, YBR191W, YBR191W-A	YBR190W, RPL21A, YBR191W-A	8544	23	1516	20	8024.05	1614.24	1033	-1.21067	0.297997	-2.70293	0.067009	7.76771	1.56267	4.9708	4.44711	26.0665	23.3203	1.11776
210	ST0210	chrII	+	607456	609024	ORF-T	YBR192W	RIM2	1040	133	661	158	976.71	703.832	1569	0.392148	1.48016	0.000317655	1.00032	0.622505	0.448587	1.3877	1.47969	0.420567	0.448444	0.937836
211	ST0211	chrII	+	609912	610576	ORF-T	YBR194W	SOY1	363	80	370	59	340.909	393.976	665	-0.780157	0.458334	-0.144416	0.865528	0.512646	0.592445	0.865306	0.529543	1.1185	0.684489	1.63406
213	ST0213	chrII	+	618816	620424	ORF-T	YBR199W	KTR4	1494	24	2596	37	1403.08	2764.22	1609	1.87261	6.50528	1.26522	3.54389	0.872021	1.71797	0.507587	1.83563	0.134048	0.484771	0.276519
214	ST0214	chrII	+	620816	622712	ORF-T	YBR200W	BEM1	997	11	1001	24	936.327	1065.86	1897	0.0071236	1.00715	0.519898	1.68186	0.493583	0.561868	0.878467	0.598832	0.490079	0.334076	1.46697
215	ST0215	chrII	+	623432	624304	ORF-T	YBR201W	DER1	630	42	675	176	591.661	718.739	873	0.348147	1.41644	-0.022006	0.978234	0.677733	0.823298	0.823192	1.44796	0.478476	0.841617	0.568521
217	ST0217	chrII	+	625688	628424	ORF-T	YBR202W	CDC47	1761	14	1651	85	1653.83	1757.98	2737	-1.04253	0.352561	-0.798225	0.450127	0.60425	0.642303	0.940756	0.783247	1.71389	1.42694	1.2011
218	ST0218	chrII	+	628936	631896	ORF-T	YBR203W	COS111	438	266	1528	62	411.345	1627.01	2961	-2.15425	0.11599	-0.376518	0.686247	0.138921	0.549481	0.252822	0.169021	1.19769	0.800705	1.4958
219	ST0219	chrII	+	633576	635016	ORF-T	YBR205W, YBR206W	KTR3, YBR206W	1780	55	1165	61	1671.68	1240.49	1441	1.30364	3.68267	0.64548	1.9069	1.16008	0.860854	1.34759	1.93123	0.315011	0.451441	0.697789
220	ST0220	chrII	+	635064	636664	ORF-T	YBR207W	FTH1	1532	46	1553	46	1438.77	1653.63	1601	0.964732	2.62408	0.932704	2.54137	0.898669	1.03288	0.870065	1.03255	0.34247	0.406424	0.842641
221	ST0221	chrII	+	645336	646176	ORF-T	YBR210W	ERV15	490	143	366	131	460.181	389.716	841	0.736465	2.08854	0.681207	1.97626	0.547183	0.463397	1.18081	1.05681	0.261993	0.234481	1.11733
222	ST0222	chrII	+	647448	650056	ORF-T	YBR212W	NGR1	674	39	2107	29	632.983	2243.53	2609	0.686865	1.98748	1.67194	5.32248	0.242615	0.85992	0.282137	0.373412	0.122072	0.161564	0.755565
223	ST0223	chrII	+	650248	651320	ORF-T	YBR213W	MET8	310	48	108	572	291.135	114.998	1073	-2.66031	0.0699263	-3.25918	0.0384199	0.271328	0.107175	2.53164	1.82005	3.88019	2.78956	1.39097
224	ST0224	chrII	+	651320	653128	ORF-T	YBR214W	SDS24	423	275	3326	30	397.258	3541.52	1809	0.889923	2.43494	1.50458	4.50226	0.219601	1.95772	0.112172	0.540827	0.0901873	0.434831	0.207408
225	ST0225	chrII	+	653288	655424	ORF-T	YBR215W	HPC2	634	72	491	94	595.417	522.816	2137	-0.484431	0.616048	0.204464	1.22687	0.278623	0.24465	1.13887	0.502131	0.452275	0.19941	2.26807
227	ST0227	chrII	+	657776	658680	ORF-T	YBR217W	ATG12	564	118	440	132	529.677	468.512	905	0.686463	1.98668	0.828603	2.29012	0.585279	0.517692	1.13055	0.8675	0.294602	0.226055	1.30323
229	ST0229	chrII	+	670488	673520	ORF-T	YBR224W, YBR225W	YBR224W, YBR225W	676	86	973	111	634.862	1036.05	3033	-0.906428	0.403965	0.0695603	1.07204	0.209318	0.341592	0.612771	0.37682	0.518159	0.318639	1.62617
230	ST0230	chrII	+	675312	676344	ORF-T	YBR228W	SLX1	387	112	401	113	363.449	426.984	1033	-0.959063	0.383252	-0.317607	0.727889	0.351838	0.413344	0.851199	0.526525	0.918034	0.567867	1.61663
231	ST0231	chrII	+	680280	680704	ORF-T	YBR230W-A	YBR230W-A	161	300419	1396	151004	151.202	1486.46	425	-0.0873843	0.916325	2.02834	7.60143	0.35577	3.49755	0.10172	0.120546	0.388257	0.460118	0.843822
233	ST0233	chrII	+	683304	684792	ORF-T	YBR233W	PBP2	353	60	359	27	331.518	382.263	1489	-0.479015	0.619393	-0.931273	0.394052	0.222645	0.256725	0.867251	1.57186	0.359456	0.6515	0.551736
234	ST0234	chrII	+	684936	685504	ORF-T	YBR233W-A	DAD3	415	124	306	240	389.745	325.829	569	0.607152	1.8352	0.916738	2.50112	0.684965	0.572634	1.19617	0.733751	0.373238	0.228951	1.63021
235	ST0235	chrII	+	686816	690328	ORF-T	YBR235W	YBR235W	985	112	1034	133	925.057	1101	3513	-0.88505	0.412694	-0.573368	0.563624	0.263324	0.313408	0.840195	0.732214	0.638062	0.556059	1.14747
236	ST0236	chrII	+	691920	694632	ORF-T	YBR237W	PRP5	753	51	828	34	707.176	881.654	2713	-1.18343	0.306227	-0.443615	0.641713	0.260662	0.324974	0.802101	0.477203	0.851204	0.506416	1.68084
239	ST0239	chrII	+	704512	705448	ORF-T	YBR242W	YBR242W	662	105	218	76	621.713	232.126	937	0.707734	2.02939	0.433035	1.54193	0.663515	0.247733	2.67834	1.31613	0.326953	0.160665	2.03501
241	ST0241	chrII	+	707312	708160	ORF-T	YBR244W	GPX2	1292	132	303	91	1213.37	322.634	849	2.17333	8.78751	0.604026	1.82947	1.42918	0.380017	3.76084	4.80331	0.162638	0.20772	0.782968
242	ST0242	chrII	+	711552	712896	ORF-T	YBR246W	YBR246W	744	69	457	25	698.723	486.613	1345	0.485597	1.62514	-0.0743486	0.928348	0.519497	0.361794	1.43589	1.75058	0.319662	0.389718	0.820238
244	ST0244	chrII	+	718328	720624	ORF-T	YBR250W	SPO23	652	46	447	86	612.322	475.965	2297	-3.65128	0.0259578	-2.11074	0.121148	0.266575	0.207212	1.28648	0.214265	10.2695	1.7104	6.00417
245	ST0245	chrII	+	721320	722392	ORF-T	YBR251W	MRPS5	944	71	1135	14	886.552	1208.55	1073	-0.153177	0.857978	0.588108	1.80058	0.826237	1.12633	0.733569	0.476502	0.963005	0.625536	1.53949
246	ST0246	chrII	+	722576	723120	ORF-T	YBR252W	DUT1	1113	77	449	40	1045.27	478.095	545	1.71759	5.57111	0.216784	1.24208	1.91792	0.877238	2.18632	4.48532	0.344262	0.706268	0.487438
247	ST0247	chrII	+	723216	723712	ORF-T	YBR253W	SRB6	542	214	513	104	509.016	546.242	497	0.555779	1.7433	1.39909	4.05151	1.02418	1.09908	0.931851	0.430284	0.587494	0.271277	2.16567
248	ST0248	chrII	+	724392	726672	ORF-T	YBR255W	YBR255W	585	160	715	319	549.399	761.331	2281	-0.714236	0.489566	0.0758041	1.07875	0.240859	0.333771	0.72163	0.453827	0.491985	0.309405	1.5901
249	ST0249	chrII	+	728840	729856	ORF-T	YBR257W	POP4	576	152	203	124	540.947	216.154	1017	-0.627086	0.534146	0.0503846	1.05168	0.531905	0.212541	2.5026	0.5079	0.995804	0.202098	4.92734
250	ST0250	chrII	+	730336	732592	ORF-T	YBR259W	YBR259W	552	49	316	43	518.408	336.477	2257	-0.792843	0.452556	-1.03611	0.354832	0.229689	0.149081	1.54069	1.27541	0.507537	0.420147	1.208
252	ST0252	chrII	+	736184	737808	ORF-T	YBR263W	SHM1	2209	173	1017	166	2074.57	1082.9	1625	1.03169	2.80581	1.08507	2.95966	1.27666	0.6664	1.91575	0.94802	0.455005	0.225161	2.02079
253	ST0253	chrII	+	738520	739624	ORF-T	YBR265W	TSC10	1611	386	1061	17	1512.96	1129.75	1105	0.906451	2.47552	0.86473	2.37436	1.3692	1.0224	1.3392	1.0426	0.553094	0.430599	1.28447
254	ST0254	chrII	+	739816	741104	ORF-T	YBR267W	REI1	2158	45	287	355	2026.67	305.597	1289	-0.151923	0.859054	-0.0740337	0.92864	1.57228	0.237081	6.63184	0.925067	1.83025	0.255299	7.16904
255	ST0255	chrII	+	741272	741752	ORF-T	YBR268W	MRPL37	869	11	794	26	816.116	845.451	481	1.12229	3.07189	1.47233	4.35938	1.69671	1.75769	0.965303	0.704663	0.552333	0.403198	1.36988
257	ST0257	chrII	+	744824	746208	ORF-T	YBR271W	YBR271W	899	29	201	62	844.291	214.025	1385	-0.554385	0.574425	-1.35774	0.257241	0.609596	0.15453	3.94483	2.23302	1.06123	0.600722	1.76659
258	ST0258	chrII	+	749544	751384	ORF-T	YBR274W	CHK1	942	63	745	65	884.674	793.275	1841	-0.0396433	0.961132	0.087122	1.09103	0.48054	0.430894	1.11522	0.88094	0.499973	0.394942	1.26594
259	ST0259	chrII	+	760256	761064	ORF-T	YBR278W	DPB3	466	183	579	98	437.641	616.519	809	0.310216	1.36372	1.07825	2.93953	0.540966	0.762075	0.709859	0.463924	0.396684	0.259251	1.53012
260	ST0260	chrII	+	761216	762736	ORF-T	YBR279W	PAF1	1112	22	1203	143	1044.33	1280.95	1521	0.805398	2.23759	1.12011	3.06518	0.686606	0.842178	0.815274	0.730001	0.306851	0.274756	1.11681
261	ST0261	chrII	+	768208	768760	ORF-T	YBR282W	MRPL27	431	94	602	88	404.771	641.009	553	0.82141	2.2737	0.888078	2.43045	0.731955	1.15915	0.631459	0.935505	0.321922	0.476927	0.674993
262	ST0262	chrII	+	770888	773776	ORF-T	YBR284W	YBR284W	322	26	717	334	302.404	763.461	2889	-2.53382	0.0793551	-2.46241	0.0852296	0.104674	0.264265	0.396097	0.931074	1.31906	3.10062	0.425419
263	ST0263	chrII	+	773776	774368	ORF-T	YBR285W	YBR285W	16	112	1359	356	15.0263	1447.06	593	-2.57441	0.076199	1.5742	4.8269	0.0253395	2.44024	0.010384	0.0157863	0.332544	0.50555	0.657786
264	ST0264	chrII	+	774664	776376	ORF-T	YBR286W	APE3	3981	149	6492	240	3738.73	6912.68	1713	2.11412	8.28227	2.6082	13.5746	2.18256	4.03542	0.540852	0.61013	0.263523	0.297277	0.886454
265	ST0265	chrII	+	776496	778016	ORF-T	YBR287W	ZSP1	2716	153	2157	154	2550.72	2296.77	1521	1.65153	5.21496	1.22671	3.40999	1.677	1.51004	1.11057	1.52932	0.321575	0.442829	0.726183
266	ST0266	chrII	+	779648	782408	ORF-T	YBR289W	SNF5	916	11	949	34	860.256	1010.49	2761	-0.325853	0.721911	0.151655	1.16376	0.311574	0.365989	0.851322	0.620327	0.431596	0.314488	1.37238
267	ST0267	chrII	+	782560	783672	ORF-T	YBR290W	BSD2	1689	64	1682	148	1586.21	1790.99	1113	0.900319	2.46039	1.23944	3.45366	1.42517	1.60916	0.885662	0.7124	0.579246	0.465928	1.24321
270	ST0270	chrII	+	787088	788656	ORF-T	YBR293W	VBA2	697	43	553	115	654.584	588.834	1569	-0.368044	0.692087	-0.0956156	0.908813	0.417198	0.375293	1.11166	0.761528	0.602811	0.412948	1.45978
271	ST0271	chrII	+	792792	796600	ORF-T	YBR295W	PCA1	973	57	795	268	913.787	846.515	3809	-1.68127	0.186137	-2.0327	0.130981	0.239902	0.222241	1.07947	1.4211	1.28884	1.69674	0.7596
273	ST0273	chrII	+	800480	802144	ORF-T	YBR297W	MAL33	375	14	8000	42	352.179	8518.39	1665	-2.54715	0.0783047	0.639606	1.89573	0.211519	5.11615	0.0413434	0.0413057	2.70123	2.69877	1.00091
3686	ST3686	chrII	-	42573	43101	CUTs	CUT443	CUT443	163	90	36	81	153.081	38.3328	529	-4.97654	0.00689788	-4.82501	0.00802647	0.289377	0.0724627	3.99346	0.859392	41.9516	9.02797	4.64685
3716	ST3716	chrII	-	146723	146971	CUTs	CUT444	CUT444	67	227	114	279	62.9227	121.387	249	-3.15819	0.0425028	-4.17829	0.0153246	0.252701	0.487498	0.518364	2.77349	5.94553	31.8114	0.186899
3752	ST3752	chrII	-	278428	280876	CUTs	CUT445	CUT445	184	171	142	21164	172.803	151.201	2449	-4.29968	0.0135729	-4.88793	0.00753704	0.0705604	0.0617401	1.14286	1.80083	5.19861	8.19156	0.63463
3758	ST3758	chrII	-	299292	299884	CUTs	CUT446	CUT446	198	183	49	109	185.951	52.1752	593	-5.01812	0.00661695	-5.06673	0.00630298	0.313576	0.0879851	3.56397	1.04981	47.3898	13.9593	3.39486
3762	ST3762	chrII	-	306988	307108	CUTs	CUT447	CUT447	236	3	210	1	221.638	223.608	121	-3.21438	0.0401803	-4.72295	0.00888895	1.83172	1.848	0.991191	4.52025	45.5875	207.898	0.219278
3774	ST3774	chrII	-	340772	340892	CUTs	CUT448	CUT448	30	0	72	6	28.1743	76.6655	121	-4.15566	0.0156754	-3.75661	0.0233629	0.232846	0.6336	0.367497	0.670953	14.8542	27.1199	0.547724
3775	ST3775	chrII	-	340892	341484	CUTs	CUT449	CUT449	567	376	499	369	532.495	531.335	593	-4.24152	0.0143857	-4.81478	0.00810904	0.897968	0.896011	1.00218	1.77403	62.4209	110.495	0.564919
3777	ST3777	chrII	-	351876	352052	CUTs	CUT450	CUT450	82	100	52	18	77.0098	55.3696	177	-3.22829	0.0396251	-3.59671	0.0274137	0.435084	0.312822	1.39083	1.44545	10.98	11.4112	0.962217
3785	ST3785	chrII	-	366603	366931	CUTs	CUT451	CUT451	46	15	43	16	43.2006	45.7864	329	-2.09759	0.122752	-2.08465	0.12435	0.131309	0.139168	0.943526	0.987145	1.06971	1.11916	0.955814
3797	ST3797	chrII	-	406099	406451	CUTs	CUT452	CUT452	278	92	563	144	261.082	599.482	353	-4.11139	0.016385	-4.00343	0.0182529	0.739609	1.69825	0.435513	0.897663	45.1395	93.0399	0.485163
3799	ST3799	chrII	-	407899	408483	CUTs	CUT453	CUT453	898	151	263	133	843.352	280.042	585	-4.28357	0.0137934	-4.37406	0.0126	1.44163	0.478705	3.01152	1.09472	104.516	37.9925	2.75096
3835	ST3835	chrII	-	535764	536252	CUTs	CUT454	CUT454	83	279	396	412	77.949	421.66	489	-4.82218	0.00804919	-4.85504	0.00778903	0.159405	0.862291	0.184862	1.0334	19.8038	110.706	0.178887
3836	ST3836	chrII	-	539340	539668	CUTs	CUT455	CUT455	129	20	338	25	121.15	359.902	329	-4.89536	0.00748119	-4.18434	0.0152322	0.368236	1.09393	0.336618	0.491143	49.2215	71.8166	0.685378
3840	ST3840	chrII	-	549124	549532	CUTs	CUT456	CUT456	577	32	80	7	541.886	85.1839	409	-3.73901	0.0237776	-4.68544	0.00922868	1.32491	0.208274	6.36137	2.57649	55.7208	22.5681	2.46901
3886	ST3886	chrII	-	704140	704268	CUTs	CUT457	CUT457	46	3	39	6	43.2006	41.5272	129	-4.28259	0.0138068	-4.34742	0.0129402	0.334889	0.321916	1.0403	1.06697	24.2553	24.8772	0.975
3892	ST3892	chrII	-	720644	721180	CUTs	CUT458	CUT458	227	26	302	35	213.186	321.569	537	-4.20322	0.0149474	-4.25199	0.0142359	0.396994	0.598826	0.662954	1.04998	26.5594	42.0645	0.631397
3878	ST3878	chrII	-	680396	681860	other	LSR1	LSR1	345113	207	190299	1713	324111	202630	1465	1.68009	5.36601	1.68444	5.38942	221.236	138.314	1.59952	0.995657	41.2291	25.664	1.6065
3688	ST3688	chrII	-	45285	45461	SUTs	SUT437	SUT437	6	5	3	6	5.63487	3.1944	177	-4.00371	0.0182477	-3.63406	0.0264086	0.0318354	0.0180474	1.76398	0.690976	1.74462	0.683392	2.55289
3710	ST3710	chrII	-	126211	127563	SUTs	SUT438	SUT438	425	122	186	1172	399.136	198.053	1353	-1.02408	0.359126	-2.96665	0.0514754	0.295001	0.14638	2.0153	6.97665	0.821442	2.8437	0.288864
3723	ST3723	chrII	-	166139	166955	SUTs	SUT439	SUT439	284	370	746	20	266.717	794.34	817	-1.71902	0.179242	0.0509014	1.05222	0.326459	0.972265	0.335772	0.170346	1.82133	0.924013	1.97111
3725	ST3725	chrII	-	169379	169931	SUTs	SUT440	SUT440	427	2180	515	711	401.015	548.372	553	-0.11449	0.891821	1.3027	3.67922	0.725162	0.99163	0.731283	0.242394	0.813125	0.269522	3.01692
3726	ST3726	chrII	-	170107	170459	SUTs	SUT441	SUT441	139	21	51	16	130.541	54.3048	353	-2.27153	0.103154	-2.46785	0.0847665	0.369805	0.153838	2.40386	1.21692	3.58496	1.81484	1.97536
3737	ST3737	chrII	-	235900	236220	SUTs	SUT442	SUT442	119	8	164	3	111.758	174.627	321	-3.3594	0.034756	-4.57381	0.0103185	0.348156	0.54401	0.639982	3.36831	10.0171	52.7216	0.190001
3742	ST3742	chrII	-	246812	248540	SUTs	SUT443	SUT443	292	348	267	955	274.23	284.301	1729	-3.60636	0.0271504	-4.48743	0.0112496	0.158606	0.164431	0.964575	2.41346	5.84176	14.6167	0.399664
3746	ST3746	chrII	-	255772	256276	SUTs	SUT444	SUT444	48	17	31	9	45.0789	33.0088	505	-3.44563	0.0318846	-3.9465	0.0193222	0.0892652	0.0653639	1.36566	1.65016	2.79963	3.38285	0.827596
3759	ST3759	chrII	-	301628	304756	SUTs	SUT445	SUT445	574	107	228	1763	539.069	242.774	3129	-2.55151	0.0779639	-3.67027	0.0254696	0.172281	0.0775884	2.22045	3.06105	2.20976	3.04631	0.725388
3808	ST3808	chrII	-	430987	431835	SUTs	SUT446	SUT446	360	190	394	165	338.092	419.531	849	-3.51531	0.0297385	-4.08045	0.0168998	0.398224	0.494147	0.805881	1.75969	13.3908	29.2398	0.457967
3837	ST3837	chrII	-	539668	541020	SUTs	SUT447	SUT447	241	636	159	4020	226.334	169.303	1353	-2.27406	0.102894	-4.2418	0.0143817	0.167283	0.125132	1.33686	7.15448	1.62578	8.70074	0.186856
3853	ST3853	chrII	-	590212	591388	SUTs	SUT448	SUT448	318	5	178	17	298.648	189.534	1177	-3.27931	0.0376542	-3.22171	0.0398868	0.253737	0.161032	1.57569	0.944026	6.73861	4.03722	1.66912
3857	ST3857	chrII	-	601316	602212	SUTs	SUT449	SUT449	486	5	151	21	456.424	160.785	897	-1.15474	0.31514	-2.04503	0.129376	0.508834	0.179247	2.83873	2.43584	1.61463	1.38547	1.1654
3858	ST3858	chrII	-	602332	602372	SUTs	SUT450	SUT450	0	2	0	0	0	0	41	-4.02474	0.0178681	-4.52555	0.0108288	0	0	#DIV/0!	1.65006	0	0	#DIV/0!
3913	ST3913	chrII	-	786476	786868	SUTs	SUT451	SUT451	517	48	426	56	485.538	453.604	393	-1.25779	0.284282	-0.29029	0.748046	1.23546	1.15421	1.0704	0.380033	4.34591	1.54297	2.8166
3914	ST3914	chrII	-	789076	792580	SUTs	SUT452	SUT452	431	52	484	124	404.771	515.363	3505	-1.58468	0.205014	-1.14295	0.318878	0.115484	0.147036	0.78541	0.642923	0.563298	0.461106	1.22162
3915	ST3915	chrII	-	792812	796564	SUTs	SUT453	SUT453	50	969	261	792	46.9572	277.913	3753	-4.92661	0.00725104	-2.89525	0.0552849	0.0125119	0.0740508	0.168964	0.131158	1.72553	1.33944	1.28825
3917	ST3917	chrII	-	799300	800060	SUTs	SUT454	SUT454	35	111	1098	556	32.87	1169.15	761	-4.64277	0.00963097	0.437529	1.54888	0.0431932	1.53633	0.0281145	0.00621804	4.48483	0.991903	4.52144
3738	ST3738	chrII	-	236908	237652	ORF-T	YBL001C	ECM15	473	1429	2581	1107	444.215	2748.25	745	1.78988	5.98872	2.20421	9.06305	0.596262	3.68892	0.161636	0.660783	0.0995643	0.407029	0.244612
3736	ST3736	chrII	-	235092	235852	ORF-T	YBL003C	HTA2	5061	152	4082	74	4753.01	4346.51	761	3.22911	25.2571	2.81744	16.7339	6.24574	5.71158	1.09352	1.50934	0.247286	0.341318	0.724505
3735	ST3735	chrII	-	216476	217164	ORF-T	YBL006C	LDB7	1717	71	1351	64	1612.51	1438.54	689	1.69381	5.44015	1.35485	3.87617	2.34036	2.08787	1.12093	1.40349	0.430202	0.538642	0.798678
3734	ST3734	chrII	-	212476	216476	ORF-T	YBL007C	SLA1	3823	16	4052	47	3590.35	4314.57	4001	0.783842	2.18987	0.855206	2.35186	0.897363	1.07837	0.832146	0.931122	0.409779	0.458519	0.893702
3733	ST3733	chrII	-	205860	206972	ORF-T	YBL010C	YBL010C	426	144	294	174	400.075	313.051	1113	-0.477544	0.620305	-0.977413	0.376283	0.359457	0.281268	1.27799	1.6485	0.579484	0.747489	0.775241
3732	ST3732	chrII	-	198931	201787	ORF-T	YBL014C	RRN6	2649	13	2740	99	2487.79	2917.55	2857	-0.333479	0.716427	-1.09937	0.33308	0.870771	1.02119	0.852699	2.15092	1.21544	3.06591	0.396436
3731	ST3731	chrII	-	186779	191795	ORF-T	YBL017C	PEP1	3052	43	2465	90	2866.27	2624.73	5017	0.378312	1.45982	0.319008	1.37576	0.571311	0.523167	1.09202	1.0611	0.391358	0.380274	1.02915
3730	ST3730	chrII	-	185907	186531	ORF-T	YBL018C	POP8	844	54	240	112	792.638	255.552	625	0.420064	1.52206	0.249595	1.2835	1.26822	0.408883	3.10167	1.18586	0.833227	0.318567	2.61554
3729	ST3729	chrII	-	181507	182147	ORF-T	YBL021C	HAP3	575	52	367	34	540.008	390.781	641	0.161555	1.17534	0.744005	2.10435	0.842446	0.609643	1.38187	0.558528	0.71677	0.289707	2.47412
3728	ST3728	chrII	-	177795	181411	ORF-T	YBL022C	PIM1	2072	32	2135	46	1945.91	2273.35	3617	0.54258	1.72044	0.54109	1.71788	0.537989	0.628517	0.855966	1.00149	0.312705	0.365868	0.854692
3727	ST3727	chrII	-	174939	177611	ORF-T	YBL023C	MCM2	1146	45	823	41	1076.26	876.33	2673	-1.01468	0.362518	-1.37305	0.253332	0.402641	0.327845	1.22814	1.431	1.11068	1.29413	0.858242
3724	ST3724	chrII	-	167363	167891	ORF-T	YBL028C	YBL028C	1188	45	110	97	1115.7	117.128	529	0.856732	2.35545	-0.0236025	0.976674	2.10908	0.221414	9.52551	2.41171	0.895404	0.226702	3.9497
3722	ST3722	chrII	-	164491	164883	ORF-T	YBL029C-A	YBL029C-A	389	228	901	1090	365.327	959.384	393	1.47039	4.35095	1.85529	6.39353	0.929586	2.44118	0.380793	0.680524	0.213651	0.381821	0.559559
3721	ST3721	chrII	-	162771	164147	ORF-T	YBL030C	PET9	2825	79	15263	53	2653.08	16252	1377	2.02551	7.58	2.20665	9.08522	1.92671	11.8025	0.163246	0.834322	0.254184	1.29909	0.195663
3720	ST3720	chrII	-	158571	159715	ORF-T	YBL033C	RIB1	1453	107	2480	57	1364.58	2640.7	1145	-0.0941664	0.910131	0.923519	2.51814	1.19177	2.30629	0.516748	0.36143	1.30945	0.915872	1.42973
3719	ST3719	chrII	-	153739	158451	ORF-T	YBL034C	STU1	816	76	676	72	766.342	719.804	4713	-1.75321	0.173216	-1.84327	0.158299	0.162602	0.152727	1.06465	1.09424	0.938721	0.964806	0.972963
3718	ST3718	chrII	-	151235	153683	ORF-T	YBL035C	POL12	825	151	635	239	774.794	676.147	2449	-1.43909	0.237143	-1.98044	0.138008	0.316372	0.276091	1.14589	1.71832	1.3341	2.00054	0.666869
3717	ST3717	chrII	-	150331	151235	ORF-T	YBL036C	YBL036C	928	36	501	60	871.526	533.464	905	1.54369	4.68184	0.915339	2.49762	0.963012	0.589463	1.63371	1.87452	0.205691	0.23601	0.871536
3715	ST3715	chrII	-	143859	145811	ORF-T	YBL039C, YBL039C-A	URA7, YBL039C-A	6025	7	307	38	5658.34	326.893	1953	1.86126	6.43185	-0.285289	0.751797	2.89726	0.16738	17.3095	8.5553	0.450455	0.22264	2.02324
3714	ST3714	chrII	-	142011	142923	ORF-T	YBL040C	ERD2	1246	248	863	337	1170.17	918.922	913	2.22476	9.25125	1.58658	4.88701	1.28168	1.00649	1.27342	1.89303	0.138541	0.205951	0.672689
3713	ST3713	chrII	-	138163	140339	ORF-T	YBL042C	FUI1	2401	67	701	90	2254.89	746.424	2177	-0.401858	0.669076	-0.101476	0.903503	1.03578	0.342868	3.02092	0.740535	1.54807	0.379488	4.07937
3712	ST3712	chrII	-	133859	135811	ORF-T	YBL045C	COR1	969	54	6371	40	910.031	6783.84	1953	1.88081	6.55881	2.76303	15.8478	0.465966	3.47355	0.134147	0.413862	0.0710442	0.219181	0.324134
3711	ST3711	chrII	-	127635	132219	ORF-T	YBL047C	EDE1	2771	288	3945	100	2602.37	4200.63	4585	0.96873	2.6346	1.1452	3.14306	0.567583	0.916169	0.619518	0.838225	0.215435	0.291489	0.739083
3709	ST3709	chrII	-	122347	124843	ORF-T	YBL051C	PIN4	1854	40	1652	39	1741.17	1759.05	2497	0.671757	1.95767	1.1373	3.11833	0.697306	0.704465	0.989838	0.627795	0.356191	0.225911	1.57669
3708	ST3708	chrII	-	119371	122139	ORF-T	YBL052C	SAS3	798	66	687	82	749.437	731.517	2769	-0.343805	0.709067	-0.166515	0.84661	0.270653	0.264181	1.0245	0.837537	0.381702	0.312046	1.22323
3707	ST3707	chrII	-	115491	117219	ORF-T	YBL055C	YBL055C	1571	135	277	202	1475.4	294.949	1729	0.739578	2.09505	-0.233303	0.791913	0.853323	0.17059	5.0022	2.64556	0.407304	0.215414	1.89079
3706	ST3706	chrII	-	112739	113451	ORF-T	YBL057C	PTH2	814	157	382	305	764.463	406.753	713	1.37284	3.94656	0.829143	2.29135	1.07218	0.570481	1.87943	1.72237	0.271674	0.248971	1.09119
3705	ST3705	chrII	-	109963	110571	ORF-T	YBL059C-A	YBL059C-A	433	49	841	36	406.649	895.496	609	1.1129	3.04316	1.68505	5.39271	0.667733	1.47044	0.454105	0.56431	0.219421	0.272671	0.804709
3704	ST3704	chrII	-	105227	107515	ORF-T	YBL061C	SKT5	1238	58	647	60	1162.66	688.925	2289	0.155791	1.16858	-0.730428	0.481703	0.507934	0.300972	1.68764	2.42594	0.434658	0.624809	0.695666
3703	ST3703	chrII	-	100323	101219	ORF-T	YBL064C	PRX1	275	41	3680	258	258.265	3918.46	897	0.699679	2.01311	2.46913	11.8121	0.28792	4.36841	0.0659097	0.170427	0.143023	0.369825	0.386732
3702	ST3702	chrII	-	96446	100171	ORF-T	YBL066C	SEF1	966	81	2068	1083	907.213	2202	3726	-1.52935	0.216676	0.264798	1.30317	0.243482	0.590984	0.411994	0.166268	1.12372	0.453498	2.47789
3701	ST3701	chrII	-	93605	96166	ORF-T	YBL067C	UBP13	1416	59	1750	41	1329.83	1863.4	2562	0.1994	1.22067	0.931239	2.53765	0.519059	0.727322	0.713657	0.481024	0.425224	0.286612	1.48362
3700	ST3700	chrII	-	88365	89501	other	YBL072C, YBL071C-B	RPS8A, YBL071C-B	6711	759	1703	408	6302.6	1813.35	1137	-1.36716	0.254829	-1.60513	0.200863	5.54318	1.59486	3.47566	1.26867	21.7526	7.94003	2.73961
3699	ST3699	chrII	-	84429	87829	ORF-T	YBL075C, YBL074C	SSA3, AAR2	876	104	1101	65	822.69	1172.34	3401	-1.58236	0.20549	2.3358	10.3377	0.241897	0.344706	0.701748	0.0198777	1.17717	0.0333445	35.3032
3698	ST3698	chrII	-	80941	84301	ORF-T	YBL076C	ILS1	9465	14	2303	41	8889	2452.23	3361	1.83887	6.28943	0.195135	1.21547	2.64475	0.729614	3.62486	5.17446	0.420507	0.600271	0.700529
3697	ST3697	chrII	-	79901	80765	ORF-T	YBL078C	ATG8	478	44	1819	52	448.911	1936.87	865	0.768383	2.15628	2.13801	8.48254	0.518972	2.23916	0.231771	0.254202	0.24068	0.263972	0.911761
3696	ST3696	chrII	-	73045	74741	ORF-T	YBL080C	PET112	357	105	585	49	335.274	622.908	1697	-0.755844	0.469614	-0.226221	0.797541	0.197569	0.367064	0.538241	0.588827	0.420705	0.460244	0.914091
3695	ST3695	chrII	-	69661	71181	ORF-T	YBL083C, YBL082C	YBL083C, ALG3	1076	18	364	27	1010.52	387.587	1521	-0.048246	0.952899	-0.642537	0.525956	0.664378	0.254824	2.60721	1.81175	0.697218	0.484496	1.43906
3694	ST3694	chrII	-	67037	69565	ORF-T	YBL084C	CDC27	1345	21	1327	30	1263.15	1412.99	2529	-0.580547	0.559592	-0.325947	0.721844	0.499466	0.558714	0.893956	0.775226	0.892553	0.77401	1.15315
3693	ST3693	chrII	-	61213	62765	ORF-T	YBL086C	YBL086C	505	36	1143	35	474.268	1217.07	1553	0.168459	1.18348	0.791865	2.20751	0.305388	0.783687	0.389681	0.536115	0.258043	0.355009	0.726862
3692	ST3692	chrII	-	59725	60845	ORF-T	YBL087C	RPL23A	5988	33	1255	56	5623.6	1336.32	1121	-0.914272	0.400808	-1.76282	0.171561	5.01659	1.19208	4.20826	2.33625	12.5162	6.94845	1.80129
3691	ST3691	chrII	-	50909	59645	ORF-T	YBL088C	TEL1	1536	99	1823	150	1442.53	1941.13	8737	-2.2351	0.106981	-1.35725	0.257367	0.165105	0.222173	0.743137	0.415676	1.54331	0.863257	1.78778
3690	ST3690	chrII	-	47213	48669	ORF-T	YBL091C	MAP2	1162	85	914	74	1091.29	973.226	1457	1.116	3.05261	0.886216	2.42593	0.748995	0.667966	1.12131	1.25833	0.245362	0.275344	0.891111
3689	ST3689	chrII	-	46525	47173	ORF-T	YBL091C-A	SCS22	320	1108	1129	462	300.526	1202.16	649	-0.524704	0.59173	-0.498848	0.60723	0.46306	1.85232	0.249989	0.974475	0.782553	3.05045	0.256537
3687	ST3687	chrII	-	44117	45013	ORF-T	YBL093C	ROX3	1455	177	708	198	1366.45	753.878	897	0.89089	2.4373	1.0203	2.77401	1.52336	0.840443	1.81257	0.878617	0.625021	0.30297	2.06298
3685	ST3685	chrII	-	24949	28605	ORF-T	YBL101C	ECM21	906	63	1742	135	850.865	1854.88	3657	-0.697969	0.497595	-0.0453312	0.955681	0.232667	0.507214	0.458717	0.52067	0.467584	0.530735	0.881012
3684	ST3684	chrII	-	21853	23797	ORF-T	YBL103C	RTG3	954	8	655	18	895.944	697.443	1945	-0.177207	0.837607	0.40661	1.50172	0.460639	0.358583	1.28461	0.557765	0.549947	0.238782	2.30314
3683	ST3683	chrII	-	18085	21309	ORF-T	YBL104C	YBL104C	1168	124	859	102	1096.92	914.662	3225	-1.00556	0.365839	-0.959801	0.382969	0.34013	0.283616	1.19926	0.95527	0.929728	0.740572	1.25542
3682	ST3682	chrII	-	14149	17965	ORF-T	YBL105C	PKC1	1637	11	1562	29	1537.38	1663.22	3817	-0.00565087	0.994365	0.556656	1.74483	0.402772	0.435739	0.924341	0.569893	0.405054	0.249732	1.62196
3681	ST3681	chrII	-	10869	13917	ORF-T	YBL106C	SRO77	311	105	210	177	292.074	223.608	3049	-1.9947	0.136054	-1.54364	0.213602	0.0957933	0.0733381	1.30619	0.636952	0.704083	0.343341	2.05068
3680	ST3680	chrII	-	9821	10565	ORF-T	YBL107C	YBL107C	553	44	412	24	519.347	438.697	745	0.641222	1.8988	0.501416	1.65106	0.69711	0.588855	1.18384	1.15005	0.367132	0.356654	1.02938
3739	ST3739	chrII	-	238796	241412	ORF-T	YBR001C	NTH2	596	60	2588	65	559.73	2755.7	2617	-0.930482	0.394364	0.685795	1.98535	0.213882	1.053	0.203117	0.198637	0.542348	0.530385	1.02255
3740	ST3740	chrII	-	241500	242604	ORF-T	YBR002C	RER2	2441	53	1324	800	2292.45	1409.79	1105	0.282501	1.32644	-0.426754	0.652624	2.07462	1.27583	1.62609	2.03248	1.56405	1.95493	0.800053
3741	ST3741	chrII	-	244292	245708	ORF-T	YBR004C	GPI18	1104	61	303	109	1036.82	322.634	1417	0.756837	2.13152	-0.351499	0.703632	0.731697	0.227688	3.21359	3.02931	0.343274	0.32359	1.06083
3743	ST3743	chrII	-	248604	251100	ORF-T	YBR007C	DSF2	606	66	343	82	569.121	365.226	2497	-0.936458	0.392014	-1.95053	0.142198	0.227922	0.146266	1.55827	2.75681	0.581413	1.02861	0.565244
3744	ST3744	chrII	-	252420	255196	ORF-T	YBR008C	FLR1	2216	102	1557	57	2081.14	1657.89	2777	-1.22955	0.292425	-0.813535	0.443288	0.749422	0.597008	1.25529	0.659672	2.56278	1.34677	1.90291
3745	ST3745	chrII	-	255260	255740	ORF-T	YBR009C	HHF1	2462	53	1738	78	2312.17	1850.62	481	2.62912	13.8616	2.51879	12.4135	4.80701	3.84744	1.2494	1.11665	0.346787	0.30994	1.11889
3747	ST3747	chrII	-	256900	258028	ORF-T	YBR011C	IPP1	4670	1104	2527	1054	4385.8	2690.75	1129	2.33622	10.3421	2.25564	9.54139	3.88468	2.3833	1.62996	1.08392	0.375618	0.249785	1.50376
3748	ST3748	chrII	-	266443	267428	ORF-T	YBR014C	GRX6	501	234	783	61	470.511	833.738	986	1.14392	3.13904	1.34436	3.83575	0.477192	0.845576	0.56434	0.818364	0.152019	0.220446	0.689595
3749	ST3749	chrII	-	267588	269668	ORF-T	YBR015C	MNN2	2864	10	2081	29	2689.71	2215.85	2081	0.344686	1.41155	0.538911	1.71414	1.29251	1.0648	1.21385	0.823472	0.915668	0.621186	1.47406
3750	ST3750	chrII	-	270684	273836	ORF-T	YBR017C	KAP104	2948	316	1453	527	2768.6	1547.15	3153	0.461983	1.58722	-0.333724	0.716251	0.878083	0.490692	1.78948	2.21601	0.553221	0.685084	0.807523
3751	ST3751	chrII	-	274180	278428	ORF-T	YBR018C, YBR019C	GAL7, GAL10	99	600	33765	906	92.9753	35952.9	4249	-4.54557	0.0106141	2.92395	18.6146	0.0218817	8.46151	0.00258603	0.000570206	2.06156	0.454563	4.53525
3753	ST3753	chrII	-	284244	288060	ORF-T	YBR023C	CHS3	2741	108	1268	237	2574.19	1350.17	3817	0.663281	1.94115	-1.01766	0.361438	0.674403	0.353724	1.90658	5.37064	0.347424	0.978658	0.355
3754	ST3754	chrII	-	290388	292076	ORF-T	YBR025C	OLA1	5830	129	1776	121	5475.21	1891.08	1689	2.02781	7.59746	1.62797	5.09353	3.24169	1.11965	2.89528	1.49159	0.42668	0.219817	1.94107
3755	ST3755	chrII	-	292732	294116	other	YBR026C, YBR027C	ETR1, YBR027C	539	178	2740	24	506.199	2917.55	1385	0.264099	1.30226	1.89789	6.67181	0.365486	2.10653	0.173501	0.195188	0.280656	0.315737	0.888893
3756	ST3756	chrII	-	294260	296100	other	YBR027C, YBR028C	YBR027C, YBR028C	884	22	957	165	830.204	1019.01	1841	0.20865	1.23201	-0.216534	0.805305	0.450952	0.55351	0.814714	1.52987	0.366029	0.68733	0.532537
3757	ST3757	chrII	-	296308	297860	ORF-T	YBR029C	CDS1	1108	280	1357	123	1040.57	1444.93	1553	0.193368	1.21333	0.249706	1.28365	0.67004	0.930414	0.720153	0.94522	0.552233	0.72482	0.761889
3760	ST3760	chrII	-	304756	306020	ORF-T	YBR034C	HMT1	4736	35	2544	146	4447.79	2708.85	1265	1.18214	3.26135	0.338606	1.40299	3.51604	2.14138	1.64195	2.32457	1.07809	1.5263	0.706345
3761	ST3761	chrII	-	306140	306988	ORF-T	YBR035C	PDX3	865	644	1367	227	812.36	1455.58	849	1.30643	3.69297	2.06345	7.87309	0.956843	1.71446	0.5581	0.469062	0.259098	0.217762	1.18982
3763	ST3763	chrII	-	308860	310372	ORF-T	YBR036C	CSG2	3008	80	2374	62	2824.95	2527.83	1513	1.75898	5.80651	1.81026	6.11204	1.86712	1.67074	1.11754	0.950011	0.321555	0.273352	1.17634
3764	ST3764	chrII	-	310444	311500	ORF-T	YBR037C	SCO1	912	151	1495	87	856.5	1591.87	1057	-0.0870473	0.916634	0.749795	2.11657	0.810312	1.50603	0.538045	0.433076	0.884008	0.711544	1.24238
3765	ST3765	chrII	-	320476	321668	ORF-T	YBR042C	CST26	766	33	484	85	719.384	515.363	1193	0.733275	2.08189	-0.798205	0.450136	0.603005	0.431989	1.39588	4.62502	0.289643	0.959685	0.301811
3766	ST3766	chrII	-	321780	324116	ORF-T	YBR043C	QDR3	1490	132	1134	81	1399.32	1207.48	2337	0.0468334	1.04795	0.656028	1.92712	0.59877	0.51668	1.15888	0.543788	0.571374	0.26811	2.13112
3767	ST3767	chrII	-	324284	326148	ORF-T	YBR044C	TCM62	642	424	892	107	602.931	949.801	1865	0.0724541	1.07514	0.328751	1.38923	0.323287	0.509277	0.634797	0.773912	0.300692	0.366589	0.820244
3768	ST3768	chrII	-	328148	330228	ORF-T	YBR045C	GIP1	101	26	191	69	94.8536	203.377	2081	-2.9366	0.0530456	-1.42411	0.240723	0.0455808	0.0977302	0.466394	0.220359	0.859275	0.405986	2.11652
3769	ST3769	chrII	-	330228	331556	ORF-T	YBR046C	ZTA1	258	79	1823	14	242.299	1941.13	1329	-0.000766303	0.999234	1.64268	5.169	0.182317	1.46059	0.124824	0.193313	0.182457	0.282568	0.645709
3770	ST3770	chrII	-	334204	336948	ORF-T	YBR049C	REB1	1251	135	1194	82	1174.87	1271.37	2745	-0.099271	0.905497	0.129684	1.13847	0.428003	0.463159	0.924097	0.795364	0.472672	0.406826	1.16185
3771	ST3771	chrII	-	337196	338324	ORF-T	YBR050C	REG2	55	823	770	414	51.6529	819.895	1129	-3.03723	0.0479678	1.43742	4.20981	0.045751	0.726214	0.0629994	0.0113943	0.953787	0.172505	5.52903
3772	ST3772	chrII	-	338668	339420	ORF-T	YBR052C	RFS1	641	74	3247	552	601.991	3457.4	753	1.44458	4.24007	1.67504	5.33899	0.799457	4.5915	0.174117	0.79417	0.188548	0.859994	0.219244
3773	ST3773	chrII	-	339636	340772	ORF-T	YBR053C	YBR053C	250	126	1698	514	234.786	1808.03	1137	1.00223	2.72435	1.99015	7.31666	0.206496	1.59018	0.129857	0.372349	0.0757965	0.217336	0.348752
3776	ST3776	chrII	-	344500	347324	ORF-T	YBR055C	PRP6	950	182	678	257	892.187	721.934	2825	-0.842613	0.430584	-0.732179	0.48086	0.315818	0.255552	1.23583	0.895445	0.733466	0.531447	1.38013
3778	ST3778	chrII	-	352052	353380	ORF-T	YBR057C	MUM2	1044	46	807	26	980.467	859.293	1329	0.529737	1.69849	0.694522	2.00275	0.737748	0.646571	1.14102	0.848076	0.434356	0.322841	1.34542
3779	ST3779	chrII	-	353572	356060	ORF-T	YBR058C	UBP14	1070	186	883	18	1004.88	940.218	2489	0.722115	2.05878	0.560638	1.75179	0.40373	0.377749	1.06878	1.17524	0.196101	0.215636	0.909409
3780	ST3780	chrII	-	356140	356628	ORF-T	YBR058C-A	TSC3	923	27	595	9	866.83	633.556	489	3.00278	20.1415	2.09828	8.15217	1.77266	1.29561	1.3682	2.47069	0.0880104	0.158929	0.553772
3781	ST3781	chrII	-	356764	360332	ORF-T	YBR059C	AKL1	1337	76	2676	71	1255.64	2849.4	3569	-0.085598	0.917963	0.0594806	1.06129	0.351817	0.798376	0.440666	0.864954	0.383259	0.752272	0.509468
3782	ST3782	chrII	-	360564	362620	ORF-T	YBR060C	ORC2	996	187	547	64	935.388	582.445	2057	-0.439175	0.644568	-0.426098	0.653052	0.454734	0.283153	1.60597	0.987009	0.705486	0.433584	1.62711
3783	ST3783	chrII	-	364604	365740	ORF-T	YBR061C	TRM7	1144	88	405	71	1074.38	431.244	1137	0.118908	1.12627	-0.396838	0.672443	0.944926	0.379282	2.49135	1.67489	0.83899	0.564036	1.48747
3784	ST3784	chrII	-	365852	366603	ORF-T	YBR062C	YBR062C	551	480	707	136	517.468	752.813	752	1.20914	3.35061	1.91877	6.81255	0.688123	1.00108	0.68738	0.491829	0.205372	0.146947	1.3976
3786	ST3786	chrII	-	366931	369747	other	YBR063C, YBR065C	YBR063C, ECM2	947	27	461	89	889.37	490.872	2817	-0.561593	0.5703	-0.564913	0.568409	0.315715	0.174254	1.81181	1.00333	0.553595	0.306564	1.80581
3787	ST3787	chrII	-	369963	370763	ORF-T	YBR066C	NRG2	378	177	191	164	354.997	203.377	801	-0.0660729	0.936063	-0.675291	0.509008	0.443192	0.253903	1.74551	1.83899	0.473464	0.49882	0.949168
3788	ST3788	chrII	-	371955	372803	ORF-T	YBR067C	TIP1	2474	370	10188	48	2323.44	10848.2	849	2.06063	7.85093	2.70194	14.9086	2.73668	12.7776	0.214178	0.526603	0.348581	0.85706	0.406717
3789	ST3789	chrII	-	373659	375747	ORF-T	YBR068C	BAP2	12572	240	11343	420	11806.9	12078	2089	1.85608	6.39859	2.05621	7.81631	5.65195	5.78172	0.977555	0.81862	0.883312	0.7397	1.19415
3790	ST3790	chrII	-	375851	378547	ORF-T	YBR069C	TAT1	6445	1253	4548	213	6052.78	4842.71	2697	1.16866	3.21767	1.4746	4.3693	2.24427	1.79559	1.24988	0.736427	0.697482	0.410956	1.69722
3791	ST3791	chrII	-	379179	379979	ORF-T	YBR070C	ALG14	423	416	429	239	397.258	456.799	801	0.0249865	1.0253	-0.67985	0.506693	0.495953	0.570286	0.869656	2.02351	0.483714	1.1255	0.429775
3792	ST3792	chrII	-	391155	391603	other	YBR076C-A	YBR076C-A	881	20	1051	20	827.386	1119.1	449	-0.683553	0.50482	-0.167194	0.846036	1.84273	2.49244	0.739329	0.596689	3.65027	2.94602	1.23905
3793	ST3793	chrII	-	391603	392347	other	YBR076C-A, YBR077C	YBR076C-A, SLM4	1597	244	2087	350	1499.81	2222.24	745	0.518158	1.67893	0.960261	2.61238	2.01317	2.98287	0.674912	0.642684	1.19908	1.14182	1.05015
3794	ST3794	chrII	-	395227	398299	ORF-T	YBR079C	RPG1	5554	109	1710	106	5216.01	1820.81	3073	1.32362	3.757	0.602474	1.82663	1.69737	0.592518	2.86467	2.05679	0.451788	0.324377	1.39279
3795	ST3795	chrII	-	398467	400923	ORF-T	YBR080C	SEC18	1190	48	1111	31	1117.58	1182.99	2457	0.52177	1.68501	-0.127394	0.880387	0.454856	0.481478	0.944708	1.91394	0.269943	0.546894	0.493593
3796	ST3796	chrII	-	401123	405387	ORF-T	YBR081C	SPT7	1065	101	877	71	1000.19	933.829	4265	-0.641859	0.526313	-0.487286	0.614291	0.234511	0.218952	1.07106	0.856781	0.445573	0.35643	1.2501
3798	ST3798	chrII	-	406451	407275	ORF-T	YBR082C	UBC4	4042	29	2065	210	3796.02	2198.81	825	2.46946	11.816	1.9341	6.91783	4.60124	2.66522	1.7264	1.70806	0.389406	0.385269	1.01074
3800	ST3800	chrII	-	414083	415299	ORF-T	YBR084C-A	RPL19A	9070	112	2697	32	8518.04	2871.76	1217	-0.3575	0.699423	-0.706009	0.49361	6.99921	2.35971	2.96614	1.41695	10.0071	4.78051	2.09332
3801	ST3801	chrII	-	418531	419267	ORF-T	YBR085C-A	YBR085C-A	752	23	4954	47	706.236	5275.02	737	2.22221	9.22767	2.40107	11.0349	0.958258	7.15742	0.133883	0.836224	0.103846	0.648614	0.160105
3802	ST3802	chrII	-	420075	423339	ORF-T	YBR086C	IST2	3168	47	3035	138	2975.21	3231.67	3265	1.09476	2.98847	0.883567	2.41951	0.911243	0.98979	0.920643	1.23515	0.30492	0.409086	0.745368
3803	ST3803	chrII	-	424891	425811	ORF-T	YBR088C	POL30	1115	45	706	44	1047.15	751.748	921	1.23688	3.44483	0.255239	1.29077	1.13697	0.81623	1.39295	2.66882	0.33005	0.632359	0.521934
3804	ST3804	chrII	-	425940	426907	ORF-T	YBR089C-A, YBR090C	NHP6B, YBR090C	3024	207	3966	147	2839.97	4222.99	968	1.61581	5.03197	1.86455	6.45302	2.93386	4.3626	0.672502	0.779786	0.583043	0.676055	0.862419
3805	ST3805	chrII	-	427019	427515	other	YBR090C, YBR091C	YBR090C, MRS5	725	100	343	132	680.88	365.226	497	-0.0913403	0.912707	-0.231326	0.793481	1.36998	0.734861	1.86427	1.15026	1.50101	0.926124	1.62074
3806	ST3806	chrII	-	427555	429131	ORF-T	YBR092C	PHO3	1785	331	199	214	1676.37	211.895	1577	1.54889	4.70623	-0.0387045	0.962035	1.06301	0.134366	7.91133	4.89195	0.225874	0.139668	1.61721
3807	ST3807	chrII	-	429459	430987	ORF-T	YBR093C	PHO5	586	321	533	122	550.339	567.538	1529	1.42847	4.17232	1.19247	3.2952	0.359934	0.371182	0.969695	1.26618	0.086267	0.112644	0.765841
3809	ST3809	chrII	-	434283	435723	ORF-T	YBR095C	RXT2	850	496	571	537	798.273	608	1441	-0.316298	0.728842	0.0408792	1.04173	0.553971	0.421929	1.31295	0.699648	0.760071	0.405029	1.87658
3810	ST3810	chrII	-	443739	444755	ORF-T	YBR101C	FES1	4447	31	1422	37	4176.37	1514.14	1017	2.34408	10.4237	1.80225	6.06326	4.10656	1.48883	2.75824	1.71916	0.393963	0.24555	1.60441
3811	ST3811	chrII	-	444787	447395	ORF-T	YBR102C	EXO84	804	118	778	39	755.072	828.414	2609	-0.612277	0.542115	-0.268168	0.764779	0.28941	0.317522	0.911467	0.708852	0.533855	0.415181	1.28584
3812	ST3812	chrII	-	450731	452115	ORF-T	YBR105C	VID24	430	61	800	111	403.832	851.839	1385	0.229148	1.25753	1.12988	3.09529	0.291575	0.615046	0.474071	0.406271	0.231864	0.198704	1.16688
3813	ST3813	chrII	-	453363	454683	ORF-T	YBR107C	IML3	559	532	515	194	524.982	548.372	1321	-0.300466	0.740473	-0.847325	0.42856	0.397412	0.415119	0.957347	1.72782	0.536701	0.968636	0.554079
3814	ST3814	chrII	-	457716	458420	ORF-T	YBR109C	CMD1	1589	36	1612	107	1492.3	1716.46	705	1.99399	7.34479	2.25718	9.55611	2.11674	2.43469	0.869408	0.768596	0.288196	0.254778	1.13116
3815	ST3815	chrII	-	461116	461844	ORF-T	YBR111C	YSA1	808	39	1694	17	758.829	1803.77	729	2.03849	7.679	2.10515	8.20832	1.04092	2.47431	0.42069	0.935515	0.135554	0.301439	0.449689
3816	ST3816	chrII	-	462636	465964	ORF-T	YBR112C	CYC8	2193	101	1754	187	2059.54	1867.66	3329	0.622066	1.86277	0.327952	1.38812	0.618667	0.561027	1.10274	1.34194	0.332122	0.404162	0.821754
3817	ST3817	chrII	-	469644	474028	ORF-T	YBR115C	LYS2	2763	42	1279	61	2594.86	1361.88	4385	-0.523488	0.59245	-0.746825	0.473869	0.591757	0.310577	1.90535	1.25024	0.99883	0.655407	1.52399
3818	ST3818	chrII	-	474436	476428	ORF-T	YBR116C, YBR117C	YBR116C, TKL2	39	901	688	443	36.6266	732.582	1993	-4.23098	0.0145382	1.43	4.17872	0.0183776	0.367577	0.0499966	0.00347909	1.2641	0.0879641	14.3706
3819	ST3819	chrII	-	480356	481004	ORF-T	YBR120C	CBP6	367	57	628	85	344.666	668.694	649	-0.189217	0.827607	0.897075	2.45242	0.531072	1.03034	0.515432	0.337466	0.641696	0.420134	1.52736
3820	ST3820	chrII	-	481212	483524	ORF-T	YBR121C, YBR121C-A	GRS1, YBR121C-A	5419	19	2067	31	5089.22	2200.94	2313	1.99218	7.33151	1.33838	3.81288	2.20027	0.951552	2.3123	1.92283	0.300111	0.249563	1.20255
3821	ST3821	chrII	-	483756	484540	ORF-T	YBR122C	MRPL36	1057	570	1110	98	992.675	1181.93	785	0.919126	2.5071	1.27736	3.58714	1.26455	1.50564	0.839879	0.698913	0.50439	0.419732	1.20169
3822	ST3822	chrII	-	484668	486756	ORF-T	YBR123C	TFC1	777	70	734	52	729.715	781.563	2089	-0.405653	0.666542	-0.081172	0.922035	0.349313	0.374132	0.933662	0.722903	0.524068	0.405768	1.29155
3823	ST3823	chrII	-	486852	488556	ORF-T	YBR125C	PTC4	730	10	654	24	685.575	696.379	1705	0.100835	1.10609	0.396732	1.48696	0.402097	0.408433	0.984486	0.743864	0.363529	0.274677	1.32348
3824	ST3824	chrII	-	488780	490484	ORF-T	YBR126C	TPS1	1773	298	7770	149	1665.1	8273.49	1705	1.72532	5.61434	1.81799	6.15949	0.9766	4.85249	0.201258	0.911495	0.173947	0.787807	0.2208
3825	ST3825	chrII	-	491116	492884	ORF-T	YBR127C	VMA2	6931	340	5203	941	6509.21	5540.15	1769	2.1506	8.59001	2.06704	7.9014	3.6796	3.1318	1.17492	1.08715	0.428358	0.39636	1.08073
3826	ST3826	chrII	-	493004	494196	ORF-T	YBR128C	ATG14	223	565	860	365	209.429	915.727	1193	-1.11596	0.327601	0.0696909	1.07218	0.175548	0.767584	0.228703	0.305547	0.53586	0.715911	0.748501
3827	ST3827	chrII	-	494276	495372	ORF-T	YBR129C	OPY1	951	21	650	20	893.126	692.119	1097	0.976553	2.65529	1.04374	2.83981	0.814153	0.63092	1.29042	0.935024	0.306616	0.22217	1.3801
3828	ST3828	chrII	-	495524	496932	ORF-T	YBR130C	SHE3	902	200	765	29	847.108	814.571	1409	-0.0153239	0.984793	-0.646799	0.523719	0.601212	0.57812	1.03994	1.88038	0.610496	1.10387	0.553049
3829	ST3829	chrII	-	499292	501556	ORF-T	YBR132C	AGP2	272	38	3508	54	255.447	3735.32	2265	-1.963	0.140437	-0.656521	0.518652	0.11278	1.64915	0.0683871	0.270772	0.803068	3.17967	0.252563
3830	ST3830	chrII	-	501660	504428	ORF-T	YBR133C	HSL7	1631	43	1022	278	1531.74	1088.22	2769	-0.289862	0.748367	-0.922706	0.397442	0.553176	0.393003	1.40756	1.88296	0.739177	0.98883	0.747527
3831	ST3831	chrII	-	513652	515412	ORF-T	YBR138C	YBR138C	210	99	397	207	197.22	422.725	1761	-1.42228	0.241164	-0.542465	0.581314	0.111993	0.240048	0.466545	0.414861	0.464386	0.412941	1.12458
3832	ST3832	chrII	-	517228	526892	ORF-T	YBR140C	IRA1	2177	67	2833	340	2044.52	3016.58	9665	-0.729664	0.482071	-0.170361	0.843361	0.211538	0.312113	0.677761	0.571607	0.438811	0.370083	1.18571
3833	ST3833	chrII	-	526892	528052	ORF-T	YBR141C	YBR141C	574	296	106	284	539.069	112.869	1161	-1.56341	0.209421	-1.56214	0.209688	0.464314	0.0972168	4.77607	0.998727	2.21713	0.463627	4.78216
3834	ST3834	chrII	-	530604	532260	ORF-T	YBR143C	SUP45	4087	111	1603	42	3838.28	1706.87	1657	2.03824	7.67709	1.212	3.36018	2.3164	1.0301	2.24872	2.28472	0.30173	0.30656	0.984243
3838	ST3838	chrII	-	541132	544516	ORF-T	YBR150C	TBS1	1047	66	1276	253	983.284	1358.68	3385	-0.90959	0.402689	-0.00286165	0.997142	0.290483	0.401384	0.723703	0.403843	0.721357	0.402534	1.79204
3839	ST3839	chrII	-	548276	549124	ORF-T	YBR154C	RPB5	2066	200	681	145	1940.27	725.128	849	2.15463	8.62473	1.4842	4.41143	2.28536	0.854097	2.67576	1.95509	0.264978	0.19361	1.36862
3841	ST3841	chrII	-	550940	553244	ORF-T	YBR156C	SLI15	495	158	321	47	464.876	341.801	2305	-1.5362	0.215197	-1.68372	0.185681	0.201682	0.148287	1.36008	1.15896	0.937194	0.798608	1.17353
3842	ST3842	chrII	-	553436	555596	ORF-T	YBR157C	ICS2	1505	391	2108	431	1413.41	2244.6	2161	-0.335239	0.715167	-1.42862	0.23964	0.654055	1.03868	0.629695	2.98433	0.914548	4.33435	0.211
3843	ST3843	chrII	-	562884	564836	ORF-T	YBR162C	TOS1	6492	27	2949	157	6096.92	3140.09	1953	2.12602	8.38148	1.75613	5.78997	3.12183	1.60783	1.94164	1.44758	0.372467	0.277692	1.34129
3844	ST3844	chrII	-	567484	568548	ORF-T	YBR164C	ARL1	1156	36	849	47	1085.65	904.014	1065	1.7151	5.55722	1.0932	2.98382	1.01939	0.84884	1.20092	1.86245	0.183435	0.284481	0.644806
3845	ST3845	chrII	-	569668	571244	ORF-T	YBR166C	TYR1	1188	108	711	113	1115.7	757.072	1577	0.633284	1.88379	-0.0155875	0.984533	0.707485	0.480071	1.47371	1.91338	0.375565	0.487613	0.770211
3846	ST3846	chrII	-	571380	572204	ORF-T	YBR167C	POP7	306	498	398	202	287.378	423.79	825	-0.577526	0.561285	0.620312	1.85951	0.348337	0.513685	0.678114	0.301846	0.620607	0.276248	2.24656
3847	ST3847	chrII	-	573668	576060	ORF-T	YBR169C	SSE2	254	157	1809	118	238.543	1926.22	2393	0.436328	1.54702	1.38196	3.9827	0.0996835	0.80494	0.12384	0.388433	0.064436	0.202109	0.318818
3848	ST3848	chrII	-	576180	578132	ORF-T	YBR170C	NPL4	1183	228	1244	215	1111.01	1324.61	1953	-0.0667713	0.935409	0.0827188	1.08624	0.568872	0.678244	0.838743	0.861147	0.608153	0.624398	0.973984
3849	ST3849	chrII	-	579012	581484	ORF-T	YBR172C	SMY2	2333	105	1059	134	2191.02	1127.62	2473	0.202826	1.22486	0.419169	1.5207	0.885978	0.455973	1.94305	0.805459	0.72333	0.299845	2.41235
3850	ST3850	chrII	-	581596	582204	ORF-T	YBR173C	UMP1	920	357	868	125	864.013	924.246	609	1.41573	4.11949	1.82826	6.22302	1.41874	1.51764	0.93483	0.661975	0.344397	0.243876	1.41218
3851	ST3851	chrII	-	584612	586220	ORF-T	YBR177C	EHT1	541	49	1408	65	508.077	1499.24	1609	0.411298	1.50877	-0.515091	0.597446	0.315772	0.931782	0.33889	2.52537	0.20929	1.55961	0.134194
3852	ST3852	chrII	-	586444	589204	ORF-T	YBR179C	FZO1	616	57	910	56	578.513	968.967	2761	-0.372113	0.689276	0.607034	1.83498	0.20953	0.350948	0.597041	0.375631	0.303986	0.191254	1.58943
3854	ST3854	chrII	-	591588	592828	ORF-T	YBR181C	RPS6B	5797	57	1063	6	5444.22	1131.88	1241	-1.18231	0.306569	-1.86623	0.154706	4.38696	0.912072	4.80988	1.98162	14.3099	5.89551	2.42724
3855	ST3855	chrII	-	593124	595020	ORF-T	YBR182C	SMP1	393	240	170	173	369.084	181.016	1897	-0.952757	0.385676	-2.04991	0.128747	0.194562	0.0954222	2.03896	2.99562	0.504469	0.741161	0.680647
3856	ST3856	chrII	-	599020	599996	ORF-T	YBR185C	MBA1	542	30	834	31	509.016	888.043	977	0.0585862	1.06034	0.328705	1.38917	0.520999	0.908948	0.573189	0.763289	0.491353	0.654311	0.750946
3859	ST3859	chrII	-	603396	604180	ORF-T	YBR188C	NTC20	272	840	266	288	255.447	283.237	785	-0.325758	0.72198	0.531927	1.70221	0.32541	0.360811	0.901886	0.424143	0.450719	0.211966	2.12637
3860	ST3860	chrII	-	608652	609804	ORF-T	YBR193C	MED8	749	228	765	166	703.419	814.571	1153	-0.208398	0.811884	0.161295	1.17503	0.610077	0.70648	0.863545	0.690946	0.751434	0.601243	1.2498
3861	ST3861	chrII	-	610492	611916	ORF-T	YBR195C	MSI1	764	89	398	143	717.506	423.79	1425	-0.983428	0.374027	-1.49782	0.223617	0.503513	0.297397	1.69307	1.67262	1.3462	1.32994	1.01222
3862	ST3862	chrII	-	612068	613964	ORF-T	YBR196C	PGI1	16153	21	7164	22	15170	7628.22	1897	2.48185	11.9633	2.23893	9.38331	7.99684	4.0212	1.98867	1.27496	0.668446	0.428549	1.55979
3863	ST3863	chrII	-	614764	615876	ORF-T	YBR197C	YBR197C	1180	1210	664	457	1108.19	707.027	1113	-0.734187	0.479895	-0.213292	0.80792	0.995679	0.635244	1.5674	0.593989	2.07478	0.786271	2.63876
3864	ST3864	chrII	-	616012	618596	ORF-T	YBR198C	TAF5	1790	145	1241	81	1681.07	1321.42	2585	-0.269669	0.763632	-0.0499637	0.951264	0.650317	0.511186	1.27217	0.802756	0.851609	0.537376	1.58476
3865	ST3865	chrII	-	624204	625044	ORF-T	YBR201C-A	YBR201C-A	198	132	522	173	185.951	555.825	841	-0.986683	0.372811	0.798999	2.22331	0.221106	0.66091	0.334549	0.167683	0.593079	0.297263	1.99513
3866	ST3866	chrII	-	631972	633420	ORF-T	YBR204C	YBR204C	511	39	1008	130	479.903	1073.32	1449	-0.0551997	0.946296	0.188996	1.20804	0.331196	0.74073	0.447121	0.783334	0.349992	0.613169	0.570792
3867	ST3867	chrII	-	636580	642668	ORF-T	YBR208C	DUR1%2C2	1375	242	1698	320	1291.32	1808.03	6089	-0.875025	0.416852	-1.20867	0.298594	0.212075	0.296934	0.714216	1.39605	0.508754	0.994439	0.511599
3868	ST3868	chrII	-	646020	647236	ORF-T	YBR211C	AME1	632	63	691	44	593.539	735.776	1217	0.223405	1.25033	0.418561	1.51977	0.487707	0.604582	0.806684	0.822706	0.390063	0.397811	0.980526
3869	ST3869	chrII	-	655308	657636	ORF-T	YBR216C	YBP1	800	82	1007	83	751.315	1072.25	2329	0.0228483	1.02311	-0.144137	0.865769	0.322591	0.460392	0.700689	1.18174	0.315304	0.531772	0.592931
3870	ST3870	chrII	-	658556	662372	ORF-T	YBR218C	PYC2	3745	158	2840	179	3517.1	3024.03	3817	0.669647	1.95355	0.927972	2.52937	0.921429	0.792253	1.16305	0.772344	0.47167	0.313221	1.50587
3871	ST3871	chrII	-	662620	664756	ORF-T	YBR219C, YBR220C	YBR219C, YBR220C	1648	84	960	461	1547.71	1022.21	2137	0.344836	1.41176	-0.17962	0.835588	0.724244	0.478337	1.51409	1.68954	0.513008	0.572456	0.896153
3872	ST3872	chrII	-	664916	666476	ORF-T	YBR221C	PDB1	2888	101	4467	35	2712.25	4756.46	1561	2.05393	7.79845	2.07693	7.97994	1.73751	3.04706	0.570224	0.977256	0.222802	0.38184	0.583495
3873	ST3873	chrII	-	666612	668388	ORF-T	YBR222C	PCS60	960	230	1456	331	901.578	1550.35	1777	0.744655	2.10572	1.18991	3.28679	0.50736	0.872452	0.581533	0.640661	0.240944	0.265442	0.907708
3874	ST3874	chrII	-	668508	670332	ORF-T	YBR223C	TDP1	522	42	761	60	490.233	810.312	1825	-1.78579	0.167665	-0.972838	0.378009	0.268621	0.444007	0.604993	0.443548	1.60213	1.17459	1.36399
3875	ST3875	chrII	-	673460	675212	other	YBR226C, YBR227C	YBR226C, MCX1	587	96	581	188	551.278	618.648	1753	0.0436812	1.04465	-0.375795	0.686743	0.314477	0.352908	0.8911	1.52116	0.301036	0.513887	0.585801
3876	ST3876	chrII	-	676228	679244	ORF-T	YBR229C	ROT2	1220	68	1532	89	1145.76	1631.27	3017	0.241093	1.27264	-0.00866912	0.991368	0.379767	0.540694	0.70237	1.28372	0.298409	0.545401	0.547136
3877	ST3877	chrII	-	679380	680092	ORF-T	YBR230C	OM14	298	33	5644	110	279.865	6009.73	713	1.04418	2.84107	2.75939	15.7902	0.392518	8.42879	0.0465687	0.179926	0.138158	0.533797	0.258821
3879	ST3879	chrII	-	682044	683156	ORF-T	YBR231C	SWC5	761	256	641	36	714.689	682.536	1113	-1.15516	0.315007	-0.577869	0.561093	0.642128	0.61324	1.04711	0.561418	2.03845	1.09294	1.86511
3880	ST3880	chrII	-	685340	686636	ORF-T	YBR234C	ARC40	1409	751	1904	822	1323.25	2027.38	1297	0.255968	1.29171	0.483457	1.62167	1.02024	1.56313	0.652693	0.796531	0.789837	0.9639	0.819419
3881	ST3881	chrII	-	690228	691732	ORF-T	YBR236C	ABD1	989	66	779	72	928.814	829.479	1505	0.336574	1.40014	0.767184	2.15369	0.617152	0.551149	1.11976	0.650113	0.440778	0.255909	1.7224
3882	ST3882	chrII	-	694588	697388	ORF-T	YBR238C	YBR238C	1400	32	202	59	1314.8	215.089	2801	0.94316	2.56808	-1.97516	0.13874	0.469404	0.0767902	6.11282	18.5101	0.182784	0.553484	0.330243
3883	ST3883	chrII	-	698300	700156	ORF-T	YBR239C	YBR239C	841	459	569	680	789.82	605.871	1857	-1.53638	0.215158	-1.69048	0.184431	0.425321	0.326263	1.30361	1.16661	1.97678	1.76903	1.11744
3884	ST3884	chrII	-	700396	702404	ORF-T	YBR240C	THI2	142	105	376	102	133.358	400.364	2009	-2.96564	0.0515273	-1.52376	0.217891	0.0663805	0.199285	0.333093	0.236482	1.28826	0.914612	1.40853
3885	ST3885	chrII	-	702500	704140	ORF-T	YBR241C	YBR241C	295	16	1739	49	277.048	1851.69	1641	-0.926781	0.395826	1.45552	4.28672	0.168828	1.12839	0.149619	0.0923377	0.426522	0.263229	1.62035
3887	ST3887	chrII	-	705268	706836	ORF-T	YBR243C	ALG7	939	192	619	89	881.856	659.111	1569	-0.0745308	0.928179	-0.597922	0.549953	0.56205	0.420083	1.33795	1.68774	0.605541	0.763853	0.792745
3888	ST3888	chrII	-	708108	711388	ORF-T	YBR245C	ISW1	1382	162	951	75	1297.9	1012.62	3281	-0.452638	0.635948	-0.874655	0.417006	0.39558	0.308633	1.28172	1.52503	0.622031	0.740116	0.840451
3889	ST3889	chrII	-	712892	714492	ORF-T	YBR247C	ENP1	1830	116	247	191	1718.63	263.005	1601	0.118458	1.12576	-0.630214	0.532478	1.07348	0.164276	6.5346	2.11419	0.953556	0.308512	3.09082
3890	ST3890	chrII	-	714764	716556	ORF-T	YBR248C	HIS7	3496	327	1121	42	3283.25	1193.64	1793	0.505597	1.65797	0.0244675	1.02477	1.83115	0.665722	2.75062	1.6179	1.10445	0.649631	1.70012
3891	ST3891	chrII	-	716772	718124	ORF-T	YBR249C	ARO4	3943	467	1354	128	3703.05	1441.74	1353	1.65524	5.23431	1.10555	3.02089	2.73691	1.06559	2.56846	1.73271	0.52288	0.35274	1.48234
3893	ST3893	chrII	-	723620	724284	ORF-T	YBR254C	TRS20	876	227	505	179	822.69	537.724	665	0.874496	2.39767	0.0609878	1.06289	1.23713	0.808607	1.52995	2.25581	0.515972	0.760765	0.678227
3894	ST3894	chrII	-	726516	727108	ORF-T	YBR255C-A	YBR255C-A	865	93	1462	104	812.36	1556.74	593	0.0512805	1.05262	1.42556	4.16018	1.36992	2.62519	0.521835	0.253022	1.30144	0.631027	2.06241
3895	ST3895	chrII	-	727300	728148	ORF-T	YBR256C	RIB5	1724	36	2034	74	1619.08	2165.8	849	1.8594	6.41987	1.97162	7.18234	1.90705	2.551	0.747568	0.893841	0.297054	0.355177	0.836355
3896	ST3896	chrII	-	729340	730196	ORF-T	YBR258C	SHG1	346	239	305	100	324.944	324.764	857	-0.944538	0.388859	-0.637783	0.528463	0.379164	0.378954	1.00055	0.735831	0.975069	0.717088	1.35976
3897	ST3897	chrII	-	732524	734652	ORF-T	YBR260C	RGD1	926	60	803	45	869.648	855.034	2129	-0.270577	0.762939	-0.251201	0.777866	0.408477	0.401613	1.01709	0.980811	0.535399	0.516301	1.03699
3898	ST3898	chrII	-	734700	735564	ORF-T	YBR261C	YBR261C	1103	279	783	176	1035.88	833.738	865	-0.227165	0.79679	-0.607326	0.544806	1.19754	0.963859	1.24245	1.46252	1.50296	1.76918	0.849526
3899	ST3899	chrII	-	735660	736076	ORF-T	YBR262C	FMP51	1249	103	1111	63	1172.99	1182.99	417	1.25453	3.5062	1.82562	6.20665	2.81293	2.83691	0.991546	0.564909	0.802273	0.457076	1.75523
3900	ST3900	chrII	-	737788	738388	ORF-T	YBR264C	YPT10	569	91	620	59	534.373	660.175	601	-0.186593	0.829782	0.276192	1.3181	0.88914	1.09846	0.809441	0.629528	1.07153	0.833367	1.28579
3901	ST3901	chrII	-	741996	742596	ORF-T	YBR269C	FMP21	562	17	1534	28	527.799	1633.4	601	0.787093	2.197	2.03038	7.61701	0.878201	2.71781	0.323129	0.288434	0.399727	0.356808	1.12029
3902	ST3902	chrII	-	742724	744716	ORF-T	YBR270C	BIT2	353	162	531	289	331.518	565.408	1993	-1.42686	0.240062	-0.612333	0.542085	0.166341	0.283697	0.586334	0.442849	0.69291	0.523344	1.324
3903	ST3903	chrII	-	746140	747820	ORF-T	YBR272C	HSM3	584	75	919	45	548.46	978.55	1681	-0.284325	0.752522	0.180042	1.19727	0.32627	0.582124	0.560482	0.628533	0.433569	0.486211	0.891731
3904	ST3904	chrII	-	748020	749396	ORF-T	YBR273C	UBX7	870	50	1111	19	817.055	1182.99	1377	0.393544	1.48223	0.981685	2.66895	0.593359	0.859108	0.690669	0.555359	0.400316	0.32189	1.24364
3905	ST3905	chrII	-	751260	757236	ORF-T	YBR275C	RIF1	976	78	678	104	916.605	721.934	5977	-1.21332	0.29721	-1.35781	0.257224	0.153355	0.120785	1.26965	1.15545	0.515984	0.469572	1.09884
3906	ST3906	chrII	-	757548	760156	ORF-T	YBR276C	PPS1	1021	13	949	15	958.866	1010.49	2609	0.156267	1.16914	0.0921909	1.09657	0.367523	0.387311	0.948908	1.06617	0.314353	0.353201	0.890013
3907	ST3907	chrII	-	762636	764716	ORF-T	YBR280C	SAF1	371	145	1627	131	348.423	1732.43	2081	-0.669224	0.512106	0.691899	1.99751	0.16743	0.832498	0.201118	0.256373	0.326945	0.416769	0.784475
3908	ST3908	chrII	-	764820	767660	ORF-T	YBR281C	DUG2	1059	17	507	51	994.554	539.853	2841	0.148453	1.16004	-1.23042	0.292171	0.350072	0.190022	1.84227	3.97041	0.301776	0.65038	0.463999
3909	ST3909	chrII	-	768788	770604	ORF-T	YBR283C	SSH1	3626	111	2204	130	3405.34	2346.82	1817	1.92478	6.85367	1.43912	4.217	1.87415	1.29159	1.45104	1.62525	0.273452	0.306282	0.892813
3910	ST3910	chrII	-	777900	779524	ORF-T	YBR288C	APM3	1038	126	537	163	974.832	571.797	1625	0.901049	2.46218	-0.111398	0.894582	0.599896	0.351875	1.70486	2.75233	0.243644	0.39334	0.619423
3911	ST3911	chrII	-	783612	784628	ORF-T	YBR291C	CTP1	623	143	498	284	585.087	530.27	1017	-0.414836	0.660449	-0.128417	0.879487	0.575307	0.521406	1.10338	0.750948	0.871085	0.592853	1.46931
3912	ST3912	chrII	-	784852	785852	other	YBR292C	YBR292C	365	407	219	218	342.788	233.191	1001	-1.88358	0.152045	-1.04353	0.352209	0.342445	0.232958	1.46999	0.431688	2.25227	0.661419	3.4052
3916	ST3916	chrII	-	796564	798580	ORF-T	YBR296C	PHO89	930	40	1774	69	873.404	1888.95	2017	0.219713	1.24572	2.19851	9.01161	0.433021	0.936516	0.462375	0.138235	0.347608	0.103923	3.34485
3918	ST3918	chrII	-	802404	804900	ORF-T	YBR298C	MAL31	347	14	3858	25	325.883	4108	2497	-0.911314	0.401996	0.794285	2.21286	0.13051	1.64517	0.079329	0.181664	0.324655	0.74346	0.436681
280	ST0280	chrIII	+	39049	39425	CUTs	CUT040	CUT040	655	140	201	58	615.139	214.025	377	-2.86917	0.0567461	-3.99713	0.0183683	1.63167	0.567705	2.87415	3.08935	28.7539	30.9067	0.930343
289	ST0289	chrIII	+	68881	69425	CUTs	CUT041	CUT041	1131	262	62	133	1062.17	66.0175	545	-4.19667	0.0150456	-4.99504	0.00677143	1.94894	0.121133	16.0892	2.22192	129.536	17.8888	7.24115
294	ST0294	chrIII	+	105794	106258	CUTs	CUT042	CUT042	262	129	134	114	246.056	142.683	465	-4.88745	0.00754066	-4.97009	0.00694255	0.529152	0.306845	1.72449	1.08615	70.1732	44.1978	1.58771
303	ST0303	chrIII	+	120474	121082	CUTs	CUT043	CUT043	77	210	675	539	72.3141	718.739	609	-2.76289	0.0631092	-2.91624	0.054137	0.118742	1.1802	0.100612	1.16573	1.88154	21.8002	0.0863083
307	ST0307	chrIII	+	131826	132242	CUTs	CUT044	CUT044	378	14	312	72	354.997	332.217	417	-2.79999	0.0608105	-4.29749	0.0136027	0.851311	0.796684	1.06857	4.47047	13.9994	58.5681	0.239028
309	ST0309	chrIII	+	139306	139986	CUTs	CUT045	CUT045	226	81	96	105	212.247	102.221	681	-4.96448	0.00698161	-5.0099	0.00667155	0.311669	0.150104	2.07636	1.04648	44.6414	22.4991	1.98414
313	ST0313	chrIII	+	155914	156042	CUTs	CUT046	CUT046	75	9	28	24	70.4358	29.8144	129	1.45351	4.27809	0.916889	2.50149	0.546014	0.231119	2.36248	1.71021	0.12763	0.0923924	1.38139
315	ST0315	chrIII	+	163922	164314	CUTs	CUT047	CUT047	379	108	394	141	355.936	419.531	393	-4.67245	0.00934937	-4.82556	0.00802209	0.905689	1.06751	0.848414	1.16545	96.8716	133.071	0.727969
318	ST0318	chrIII	+	179034	179410	CUTs	CUT048	CUT048	596	4	87	6	559.73	92.6375	377	-4.23152	0.0145302	-4.73942	0.00874369	1.48469	0.245723	6.04215	1.6618	102.18	28.1029	3.63591
317	ST0317	chrIII	+	177170	177354	other	snR65	SNR65	5300	535	9777	154	4977.46	10410.5	185	-0.939235	0.390927	-3.09105	0.0454544	26.9052	56.2732	0.478118	8.60043	68.8241	1238.02	0.0555923
281	ST0281	chrIII	+	39569	41313	SUTs	SUT025	SUT025	234	458	633	1281	219.76	674.018	1745	-1.89251	0.150692	-1.42799	0.239789	0.125937	0.386257	0.326044	0.628437	0.835721	1.61082	0.518818
283	ST0283	chrIII	+	50409	50793	SUTs	SUT026	SUT026	146	11	112	425	137.115	119.258	385	-3.35254	0.0349955	-2.75297	0.0637381	0.356143	0.30976	1.14974	0.549052	10.1768	4.85988	2.09405
295	ST0295	chrIII	+	106258	106402	SUTs	SUT027	SUT027	27	52	12	44	25.3569	12.7776	145	-3.30973	0.036526	-3.40179	0.0333136	0.174875	0.0881213	1.98448	1.09643	4.78769	2.6452	1.80995
300	ST0300	chrIII	+	114562	115010	SUTs	SUT028	SUT028	44	22	45	37	41.3223	47.916	449	-3.05345	0.047196	-1.66235	0.189693	0.092032	0.106717	0.862392	0.248802	1.94999	0.562577	3.46618
301	ST0301	chrIII	+	116394	117306	SUTs	SUT029	SUT029	91	157	121	191	85.4621	128.841	913	-2.12223	0.119765	-1.84715	0.157686	0.0936058	0.141118	0.663316	0.759516	0.781581	0.894933	0.873341
304	ST0304	chrIII	+	123306	124066	SUTs	SUT030	SUT030	128	9589	619	14585	120.21	659.111	761	-4.90039	0.00744371	-2.7556	0.0635708	0.157964	0.866111	0.182383	0.117093	21.2211	13.6244	1.55759
305	ST0305	chrIII	+	125242	126026	SUTs	SUT031	SUT031	260	58	521	104	244.178	554.76	785	-1.26488	0.282272	-0.802291	0.448301	0.311054	0.706701	0.44015	0.629648	1.10197	1.5764	0.69904
314	ST0314	chrIII	+	157722	159258	SUTs	SUT032	SUT032	580	304	835	511	544.704	889.107	1537	-2.70322	0.0669894	-3.30581	0.0366697	0.354394	0.578469	0.612641	1.82683	5.2903	15.7751	0.335357
316	ST0316	chrIII	+	173642	175706	SUTs	SUT033	SUT033	95	348	57	800	89.2187	60.6936	2065	-4.65688	0.00949608	-4.64737	0.00958677	0.0432052	0.0293916	1.46999	0.99054	4.54979	3.06585	1.48403
323	ST0323	chrIII	+	202698	204442	SUTs	SUT034	SUT034	407	350	217	394	382.232	231.061	1745	-2.45392	0.0859562	-3.41929	0.0327357	0.219044	0.132413	1.65424	2.62577	2.54832	4.04493	0.630004
324	ST0324	chrIII	+	205762	205938	SUTs	SUT035	SUT035	31	12	41	7	29.1135	43.6568	177	-2.75357	0.0637001	-1.49553	0.22413	0.164483	0.246648	0.666872	0.284211	2.58214	1.10047	2.3464
325	ST0325	chrIII	+	206826	208042	SUTs	SUT036	SUT036	487	1054	137	737	457.363	145.877	1217	-3.59045	0.0275858	-4.16046	0.0156004	0.375812	0.119866	3.13526	1.76827	13.6234	7.68355	1.77306
331	ST0331	chrIII	+	223498	224210	SUTs	SUT037	SUT037	218	731	26	342	204.733	27.6848	713	-2.8144	0.0599409	-4.08013	0.0169052	0.287144	0.0388286	7.39516	3.5457	4.79045	2.29684	2.08567
339	ST0339	chrIII	+	242594	244122	SUTs	SUT038	SUT038	480	132	241	110	450.789	256.617	1529	-1.71558	0.17986	-1.27886	0.278355	0.294826	0.167833	1.75666	0.646151	1.6392	0.602945	2.71866
349	ST0349	chrIII	+	273090	274354	SUTs	SUT039	SUT039	126	17	42	58	118.332	44.7216	1265	-3.1682	0.0420794	-3.31956	0.0361687	0.0935432	0.035353	2.64598	1.16342	2.22302	0.977447	2.27431
355	ST0355	chrIII	+	298642	299522	SUTs	SUT040	SUT040	67	122	66	297	62.9227	70.2767	881	-3.58019	0.0278705	-2.94262	0.0527273	0.0714219	0.0797693	0.895355	0.528577	2.56264	1.51286	1.6939
299	ST0299	chrIII	+	111842	112514	ORF-T	YCL001W	RER1	1077	31	1020	42	1011.46	1086.1	673	1.61145	5.01005	1.48765	4.42669	1.50291	1.61381	0.93128	1.13178	0.299979	0.364564	0.822844
298	ST0298	chrIII	+	109018	111810	ORF-T	YCL004W	PGS1	594	893	673	476	557.852	716.61	2793	-1.70526	0.181726	-1.14546	0.318078	0.199732	0.256574	0.778459	0.571326	1.09908	0.806638	1.36255
297	ST0297	chrIII	+	107970	108866	ORF-T	YCL005W	LDB16	925	72	691	86	868.708	735.776	897	-0.114926	0.891432	-0.0732168	0.929399	0.96846	0.820263	1.18067	0.959149	1.08641	0.882574	1.23096
296	ST0296	chrIII	+	106962	107530	ORF-T	YCL005W-A	VMA9	1369	3952	833	2927	1285.69	886.978	569	1.13814	3.12095	1.12931	3.09354	2.25956	1.55884	1.44952	1.00886	0.723998	0.503901	1.43679
293	ST0293	chrIII	+	96186	101258	ORF-T	YCL014W	BUD3	1086	68	871	163	1019.91	927.44	5073	-1.52111	0.218469	-1.55138	0.211955	0.201047	0.182819	1.09971	1.03074	0.920252	0.862537	1.06691
292	ST0292	chrIII	+	91114	92586	ORF-T	YCL018W	LEU2	6	23	14	36	5.63487	14.9072	1473	-5.09197	0.00614588	-4.90663	0.00739738	0.00382543	0.0101203	0.377997	0.830818	0.622439	1.36809	0.454969
291	ST0291	chrIII	+	79106	82322	ORF-T	YCL024W	KCC4	685	107	836	52	643.314	890.172	3217	-1.55336	0.211536	-1.68904	0.184697	0.199973	0.276709	0.722685	1.14531	0.945338	1.49817	0.630993
290	ST0290	chrIII	+	70089	71457	ORF-T	YCL028W	RNQ1	1221	47	1272	27	1146.7	1354.42	1369	0.975888	2.65352	1.41424	4.11338	0.837615	0.989353	0.846629	0.645096	0.315662	0.240521	1.31241
288	ST0288	chrIII	+	63401	64689	ORF-T	YCL032W	STE50	487	210	663	140	457.363	705.962	1289	-0.10196	0.903066	0.662669	1.93996	0.35482	0.547682	0.647858	0.465507	0.392906	0.282316	1.39173
287	ST0287	chrIII	+	61617	62745	ORF-T	YCL034W	LSB5	1284	99	2147	287	1205.86	2286.12	1129	0.708575	2.0311	1.27189	3.56761	1.06808	2.02491	0.52747	0.569316	0.525864	0.567582	0.926497
286	ST0286	chrIII	+	58969	60809	ORF-T	YCL036W	GFD2	1715	266	120	993	1610.63	127.776	1841	-1.36962	0.254203	-1.86327	0.155164	0.874868	0.0694057	12.6051	1.63828	3.44162	0.447304	7.69413
285	ST0285	chrIII	+	52625	54905	ORF-T	YCL039W	GID7	707	135	1409	119	663.975	1500.3	2281	-0.320278	0.725947	0.281965	1.32573	0.291089	0.657739	0.442561	0.547582	0.400979	0.496133	0.808209
284	ST0284	chrIII	+	50793	52537	ORF-T	YCL042W, YCL040W	YCL042W, GLK1	538	25	24067	78	505.26	25626.5	1745	1.87878	6.54552	2.57944	13.1898	0.289547	14.6857	0.0197163	0.496256	0.0442359	1.11341	0.03973
282	ST0282	chrIII	+	41417	41809	ORF-T	YCL048W-A	YCL048W-A	6	7	136	24	5.63487	144.813	393	-4.81807	0.00808238	1.90018	6.6871	0.0143381	0.36848	0.0389114	0.00120865	1.77399	0.0551031	32.1941
279	ST0279	chrIII	+	35569	37689	ORF-T	YCL051W	LRE1	651	85	865	56	611.383	921.051	2121	-0.277224	0.757885	-0.0971586	0.907412	0.288252	0.434253	0.663788	0.835216	0.380338	0.478562	0.79475
278	ST0278	chrIII	+	31433	34065	ORF-T	YCL054W	SPB1	2702	58	434	136	2537.57	462.123	2633	0.418246	1.51929	-0.368498	0.691772	0.963755	0.175512	5.49111	2.19623	0.634344	0.253713	2.50024
277	ST0277	chrIII	+	27897	28945	ORF-T	YCL055W	KAR4	567	1070	461	505	532.495	490.872	1049	0.411959	1.50977	0.0694221	1.07189	0.507621	0.467943	1.08479	1.40852	0.336224	0.43656	0.770167
276	ST0276	chrIII	+	24753	27033	ORF-T	YCL057W	PRD1	1201	105	1423	190	1127.91	1515.21	2281	0.178316	1.1952	0.611036	1.84234	0.494481	0.664274	0.744394	0.648742	0.413722	0.36056	1.14744
275	ST0275	chrIII	+	23561	23977	ORF-T	YCL058W-A	YCL058W-A	629	274	127	902	590.722	135.229	417	-2.71584	0.0661495	-1.01336	0.362999	1.4166	0.324291	4.36829	0.182231	21.4151	0.893368	23.9712
274	ST0274	chrIII	+	17249	18649	ORF-T	YCL063W	VAC17	616	94	367	71	578.513	390.781	1401	-0.286949	0.75055	-0.558944	0.571813	0.412929	0.27893	1.4804	1.31258	0.550168	0.4878	1.12786
302	ST0302	chrIII	+	118602	119290	ORF-T	YCR003W	MRPL32	563	62	520	177	528.738	553.696	689	0.53973	1.71554	0.627781	1.87345	0.767399	0.803622	0.954926	0.915715	0.447321	0.428953	1.04282
306	ST0306	chrIII	+	128010	130538	ORF-T	YCR008W	SAT4	1584	71	2124	82	1487.6	2261.63	2529	0.496013	1.64216	1.12822	3.09016	0.588218	0.89428	0.657757	0.531416	0.358198	0.289396	1.23774
308	ST0308	chrIII	+	137674	139058	ORF-T	YCR012W	PGK1	40054	180	24624	135	37616.5	26219.6	1385	2.85213	17.3246	2.8947	18.0781	27.1599	18.9311	1.43467	0.958322	1.56771	1.04719	1.49706
310	ST0310	chrIII	+	143602	144674	ORF-T	YCR016W	YCR016W	741	76	118	77	695.906	125.646	1073	0.32272	1.38088	-0.173276	0.840906	0.648561	0.117098	5.53861	1.64213	0.469672	0.139252	3.37281
311	ST0311	chrIII	+	152698	154018	ORF-T	YCR019W	MAK32	348	54	427	65	326.822	454.669	1321	-1.04442	0.351896	-0.641672	0.526411	0.247405	0.344186	0.718813	0.668481	0.703064	0.653834	1.07529
312	ST0312	chrIII	+	155274	155914	ORF-T	YCR020W-B	HTL1	866	16	301	25	813.299	320.505	641	1.12478	3.07955	0.248333	1.28189	1.2688	0.500007	2.53756	2.40236	0.412007	0.390056	1.05628
319	ST0319	chrIII	+	179410	186050	ORF-T	YCR032W	BPH1	931	221	1066	226	874.343	1135.08	6641	-1.45916	0.232431	-0.949922	0.386771	0.131658	0.170919	0.770295	0.600952	0.56644	0.441913	1.28179
320	ST0320	chrIII	+	186282	190330	ORF-T	YCR033W	SNT1	1707	23	1581	48	1603.12	1683.45	4049	0.0612741	1.06319	0.343116	1.40933	0.39593	0.415769	0.952283	0.754393	0.372398	0.295011	1.26232
321	ST0321	chrIII	+	190546	191874	ORF-T	YCR034W	FEN1	2661	142	791	82	2499.06	842.256	1329	1.83576	6.26987	0.0971987	1.10208	1.88041	0.633752	2.96711	5.68913	0.299912	0.575051	0.521539
322	ST0322	chrIII	+	193258	194378	ORF-T	YCR036W	RBK1	845	99	1480	123	793.577	1575.9	1121	1.36878	3.93053	1.05165	2.86238	0.707919	1.4058	0.50357	1.37317	0.180108	0.49113	0.36672
326	ST0326	chrIII	+	208090	209858	other	YCR045W-A	YCR045W-A	1065	130	791	171	1000.19	842.256	1769	-0.711993	0.490665	-1.04715	0.350937	0.565398	0.47612	1.18751	1.39816	1.15231	1.35671	0.849339
327	ST0327	chrIII	+	211842	213858	ORF-T	YCR048W	ARE1	1226	158	1005	302	1151.39	1070.12	2017	-0.0165899	0.983547	-0.483806	0.616433	0.570843	0.530552	1.07594	1.59555	0.580392	0.86068	0.674341
328	ST0328	chrIII	+	214050	214882	ORF-T	YCR051W	YCR051W	1472	250	900	216	1382.42	958.319	833	0.726324	2.06747	0.737425	2.09055	1.65957	1.15044	1.44255	0.98896	0.802706	0.550308	1.45865
329	ST0329	chrIII	+	214882	216634	ORF-T	YCR052W	RSC6	1557	72	1185	38	1462.25	1261.79	1753	0.0949282	1.09958	0.00323217	1.00324	0.83414	0.719787	1.15887	1.09603	0.758599	0.717465	1.05733
330	ST0330	chrIII	+	216634	218314	ORF-T	YCR053W	THR4	3529	55	1384	27	3314.24	1473.68	1681	1.78078	5.93448	1.16418	3.20328	1.97159	0.87667	2.24895	1.85262	0.332226	0.273679	1.21393
332	ST0332	chrIII	+	224378	224746	ORF-T	YCR060W	TAH1	496	87	250	35	465.816	266.2	369	-0.210287	0.810351	0.208769	1.23216	1.26237	0.721409	1.74987	0.657667	1.55781	0.585483	2.66072
333	ST0333	chrIII	+	225514	227794	ORF-T	YCR061W	YCR061W	522	54	2347	574	490.233	2499.08	2281	-0.286982	0.750525	0.281581	1.32522	0.21492	1.09561	0.196165	0.566339	0.28636	0.826736	0.346374
334	ST0334	chrIII	+	228290	229274	ORF-T	YCR063W	BUD31	820	971	451	375	770.098	480.224	985	-1.71756	0.179504	-1.44391	0.236002	0.781826	0.487537	1.60362	0.760603	4.35548	2.06582	2.10836
335	ST0335	chrIII	+	229274	231314	ORF-T	YCR065W	HCM1	1083	16	1053	49	1017.09	1121.23	2041	-0.128862	0.879095	-0.127097	0.880648	0.498331	0.549355	0.90712	0.998237	0.566868	0.623808	0.908722
336	ST0336	chrIII	+	231450	233082	ORF-T	YCR066W	RAD18	385	55	355	46	361.571	378.004	1633	-0.911111	0.402077	-0.701613	0.495785	0.221415	0.231478	0.956526	0.810991	0.550678	0.466892	1.17945
337	ST0337	chrIII	+	237074	238890	ORF-T	YCR068W	ATG15	539	413	1080	196	506.199	1149.98	1817	-1.27614	0.279114	0.183391	1.20128	0.27859	0.632902	0.440179	0.232346	0.998125	0.526855	1.8945
338	ST0338	chrIII	+	238890	240098	ORF-T	YCR069W	CPR4	872	185	1014	214	818.934	1079.71	1209	1.08949	2.97274	1.23382	3.43433	0.677365	0.893057	0.758478	0.865596	0.227858	0.260038	0.876249
340	ST0340	chrIII	+	246930	247914	ORF-T	YCR073W-A	SOL2	538	162	1475	273	505.26	1570.58	985	0.267515	1.30671	1.00795	2.73997	0.512954	1.5945	0.321703	0.476908	0.392553	0.581939	0.67456
341	ST0341	chrIII	+	248946	249290	ORF-T	YCR075W-A	YCR075W-A	301	118	373	189	282.682	397.17	345	-0.409008	0.664309	-0.166378	0.846727	0.819369	1.15122	0.711741	0.784561	1.23342	1.35961	0.907184
342	ST0342	chrIII	+	252794	254202	ORF-T	YCR079W	PTC6	762	688	1220	504	715.628	1299.05	1409	-0.0517925	0.949526	0.603941	1.82931	0.507898	0.921969	0.550883	0.519061	0.534896	0.503998	1.06131
343	ST0343	chrIII	+	254322	258842	ORF-T	YCR081W	SRB8	956	193	899	121	897.822	957.254	4521	-1.81233	0.163274	-1.16401	0.312232	0.198589	0.211735	0.937914	0.522925	1.21629	0.678133	1.79359
344	ST0344	chrIII	+	258842	259370	ORF-T	YCR082W	AHC2	536	54	766	62	503.381	815.636	529	1.50464	4.50255	2.15221	8.60389	0.951571	1.54185	0.617164	0.523316	0.21134	0.179203	1.17933
345	ST0345	chrIII	+	259554	260074	ORF-T	YCR083W	TRX3	244	183	683	156	229.151	727.258	521	-0.0535907	0.94782	1.70939	5.52561	0.43983	1.39589	0.315089	0.171532	0.464043	0.252621	1.83691
346	ST0346	chrIII	+	263298	263970	ORF-T	YCR086W	CSM1	327	209	383	103	307.1	407.818	673	-1.79207	0.166614	-1.44336	0.236134	0.456315	0.60597	0.753032	0.705593	2.73875	2.56622	1.06723
347	ST0347	chrIII	+	265026	266938	ORF-T	YCR088W	ABP1	1500	71	2205	33	1408.72	2347.88	1913	0.656319	1.92768	1.17903	3.25122	0.736391	1.22733	0.599994	0.592911	0.382008	0.377499	1.01195
348	ST0348	chrIII	+	267146	272290	ORF-T	YCR089W	FIG2	727	113	628	133	682.758	668.694	5145	-1.66474	0.18924	-1.24865	0.286893	0.132703	0.12997	1.02103	0.65962	0.701242	0.453025	1.54791
350	ST0350	chrIII	+	274354	277474	ORF-T	YCR091W	KIN82	3160	155	7552	120	2967.7	8041.36	3121	-2.11471	0.120668	0.356694	1.4286	0.95088	2.57653	0.369054	0.084466	7.88014	1.80354	4.36926
351	ST0351	chrIII	+	280042	286522	ORF-T	YCR093W	CDC39	3594	34	3074	80	3375.28	3273.19	6481	-0.00749381	0.992534	-0.103313	0.901845	0.520797	0.505044	1.03119	1.10056	0.524714	0.560012	0.936969
352	ST0352	chrIII	+	286706	288202	ORF-T	YCR094W	CDC50	639	75	589	65	600.113	627.167	1497	-1.03952	0.353626	-0.423183	0.654959	0.400877	0.418949	0.956864	0.53992	1.13362	0.639657	1.77223
353	ST0353	chrIII	+	289498	291202	ORF-T	YCR095W-A	YCR095W-A	326	84	395	68	306.161	420.596	1705	-1.64433	0.193142	-1.03014	0.356958	0.179567	0.246684	0.727922	0.541078	0.929711	0.691071	1.34532
354	ST0354	chrIII	+	293826	294338	other	YCR097W	HMRA1	981	100	2147	98	921.3	2286.12	513	0.9854	2.67888	2.2939	9.91357	1.79591	4.45638	0.402997	0.270224	0.670394	0.449523	1.49134
3924	ST3924	chrIII	-	27389	27581	CUTs	CUT459	CUT459	113	10	43	20	106.123	45.7864	193	-1.11711	0.327224	-1.86994	0.154132	0.549862	0.237235	2.31779	2.12301	1.68038	1.53917	1.09175
3925	ST3925	chrIII	-	28613	29109	CUTs	CUT460	CUT460	799	205	463	142	750.376	493.002	497	-3.15085	0.0428155	-4.2593	0.0141322	1.50981	0.991956	1.52206	3.02964	35.2632	70.191	0.502389
3926	ST3926	chrIII	-	29909	30405	CUTs	CUT461	CUT461	343	554	178	470	322.126	189.534	497	-3.38861	0.0337556	-3.49336	0.0303986	0.648142	0.381357	1.69957	1.11043	19.201	12.5452	1.53055
3927	ST3927	chrIII	-	30845	31189	CUTs	CUT462	CUT462	111	729	74	233	104.245	78.7951	345	-3.79241	0.0225413	-3.6705	0.0254638	0.302159	0.228392	1.32299	0.885229	13.4047	8.96928	1.49451
3956	ST3956	chrIII	-	119142	119374	CUTs	CUT463	CUT463	29	113	214	120	27.2352	227.867	233	-4.44625	0.0117225	-3.58222	0.0278139	0.116889	0.97797	0.119522	0.42146	9.97138	35.1611	0.283591
3962	ST3962	chrIII	-	130070	130454	CUTs	CUT464	CUT464	48	164	40	208	45.0789	42.592	385	-2.53306	0.0794159	-4.8238	0.0080362	0.117088	0.110628	1.05839	9.88226	1.47437	13.7663	0.1071
3970	ST3970	chrIII	-	147782	148078	CUTs	CUT465	CUT465	181	134	137	32	169.985	145.877	297	-0.612109	0.542206	-1.0764	0.340821	0.57234	0.49117	1.16526	1.59088	1.05558	1.44114	0.73246
3983	ST3983	chrIII	-	178254	178478	CUTs	CUT466	CUT466	899	4	533	5	844.291	567.538	225	-5.06442	0.00631757	-4.75371	0.00861962	3.7524	2.52239	1.48764	0.732929	593.963	292.634	2.02971
3997	ST3997	chrIII	-	238014	238702	CUTs	CUT467	CUT467	397	147	168	345	372.84	178.886	689	-4.82819	0.00800102	-4.79886	0.00823916	0.541132	0.259632	2.08423	0.971096	67.633	31.5119	2.14627
3984	ST3984	chrIII	-	178510	178806	other	snR189	SNR189	6913	45	8708	19	6492.3	9272.27	297	-1.54916	0.212425	-2.50884	0.0813624	21.8596	31.2198	0.700185	2.61085	102.905	383.712	0.268182
3968	ST3968	chrIII	-	142206	142542	other	snR33	SNR33	11508	25	10356	12	10807.7	11027.1	337	1.18942	3.28516	1.21392	3.36666	32.0702	32.7212	0.980105	0.975792	9.76216	9.7192	1.00442
3951	ST3951	chrIII	-	107470	107830	other	snR43	SNR43	8192	447	4780	297	7693.47	5089.74	361	-0.652363	0.520813	-1.67397	0.187501	21.3116	14.099	1.51156	2.77766	40.9197	75.1945	0.544185
3953	ST3953	chrIII	-	113222	114278	SUTs	SUT455	SUT455	310	72	239	101	291.135	254.487	1057	-2.24736	0.105678	-1.8972	0.149987	0.275435	0.240763	1.14401	0.704581	2.60635	1.60522	1.62367
3954	ST3954	chrIII	-	115438	117286	SUTs	SUT456	SUT456	282	111	321	125	264.839	341.801	1849	-2.10991	0.121249	-1.37298	0.253352	0.143233	0.184857	0.774834	0.47858	1.18131	0.729645	1.61903
3981	ST3981	chrIII	-	176598	176942	SUTs	SUT457	SUT457	213	19	324	32	200.038	344.995	345	0.215291	1.24022	1.68606	5.39818	0.579819	0.999985	0.579828	0.229748	0.467512	0.185245	2.52375
3995	ST3995	chrIII	-	225270	227886	SUTs	SUT458	SUT458	67	593	637	3145	62.9227	678.277	2617	-4.53065	0.0107737	-2.69765	0.0673635	0.0240438	0.259181	0.0927684	0.159934	2.23172	3.8475	0.580043
4011	ST4011	chrIII	-	308294	309966	SUTs	SUT459	SUT459	211	17	379	27	198.159	403.559	1673	-2.37958	0.0925896	-0.533349	0.586637	0.118446	0.241219	0.49103	0.157831	1.27925	0.411189	3.11111
3952	ST3952	chrIII	-	110550	111726	ORF-T	YCL002C	YCL002C	821	109	424	124	771.037	451.475	1177	0.94303	2.56775	0.182981	1.20079	0.655087	0.383581	1.70782	2.13838	0.255121	0.31944	0.79865
3950	ST3950	chrIII	-	105582	106878	ORF-T	YCL008C	STP22	807	305	680	167	757.889	724.063	1297	-0.59152	0.553485	-0.0906103	0.913374	0.58434	0.55826	1.04672	0.605979	1.05575	0.611207	1.72732
3949	ST3949	chrIII	-	104502	105582	ORF-T	YCL009C	ILV6	2863	65	1955	38	2688.77	2081.68	1081	1.42555	4.16014	1.765	5.84159	2.4873	1.9257	1.29163	0.712159	0.597888	0.329654	1.81369
3948	ST3948	chrIII	-	103406	104406	ORF-T	YCL010C	SGF29	1626	100	1522	42	1527.05	1620.62	1001	0.315569	1.37104	0.433406	1.5425	1.52552	1.61901	0.942259	0.888841	1.11268	1.0496	1.0601
3947	ST3947	chrIII	-	102014	103406	ORF-T	YCL011C	GBP2	2484	15	1749	26	2332.83	1862.33	1393	2.02446	7.57199	1.57635	4.83724	1.67468	1.33692	1.25264	1.56535	0.221168	0.276381	0.800229
3946	ST3946	chrIII	-	101342	101782	ORF-T	YCL012C	YCL012C	218	27	307	61	204.733	326.893	441	-0.125421	0.882125	1.1207	3.06701	0.464248	0.741255	0.6263	0.287618	0.526284	0.241687	2.17754
3945	ST3945	chrIII	-	94478	95798	ORF-T	YCL016C	DCC1	448	30	324	26	420.737	344.995	1321	-0.649866	0.522116	-0.346862	0.706903	0.318499	0.261162	1.21954	0.738596	0.610015	0.369445	1.65116
3944	ST3944	chrIII	-	92438	94382	ORF-T	YCL017C	NFS1	1136	23	975	69	1066.87	1038.18	1945	0.00303341	1.00304	0.490189	1.63262	0.548518	0.533768	1.02763	0.614372	0.546857	0.326939	1.67266
3943	ST3943	chrIII	-	75925	77982	ORF-T	YCL025C	AGP1	1001	63	2135	110	940.083	2273.35	2058	0.32745	1.38743	1.07444	2.92836	0.456795	1.10464	0.413524	0.473789	0.329239	0.377221	0.872802
3942	ST3942	chrIII	-	73365	74021	ORF-T	YCL026C-B	HBN1	37	51	98	27	34.7483	104.35	657	-2.49934	0.0821395	-2.62451	0.072475	0.0528894	0.158828	0.332997	1.13335	0.643898	2.19149	0.293817
3941	ST3941	chrIII	-	68493	69981	ORF-T	YCL029C	BIK1	837	1254	431	118	786.064	458.928	1489	0.222368	1.24903	-0.0553209	0.946181	0.527914	0.308213	1.71282	1.32008	0.422659	0.325744	1.29752
3940	ST3940	chrIII	-	65773	68389	ORF-T	YCL030C	HIS4	6671	35	873	53	6265.03	929.57	2617	1.37088	3.93883	-0.0221365	0.978107	2.39397	0.355204	6.73971	4.02699	0.607789	0.363155	1.67363
3939	ST3939	chrIII	-	64581	65621	ORF-T	YCL031C	RRP7	2056	32	1158	50	1930.88	1233.04	1041	1.00383	2.72872	0.865887	2.37711	1.85483	1.18447	1.56595	1.14791	0.679745	0.498283	1.36418
3938	ST3938	chrIII	-	62709	63285	ORF-T	YCL033C	YCL033C	226	191	653	568	212.247	695.314	577	0.722657	2.0599	1.84144	6.30564	0.367845	1.20505	0.305253	0.326675	0.178574	0.191107	0.934423
3937	ST3937	chrIII	-	60717	61237	ORF-T	YCL035C	GRX1	1131	190	3200	32	1062.17	3407.36	521	1.77743	5.91463	2.50015	12.1843	2.03872	6.54003	0.311729	0.48543	0.344691	0.536758	0.642171
3936	ST3936	chrIII	-	56869	58749	ORF-T	YCL037C	SRO9	4498	46	779	115	4224.27	829.479	1881	0.737587	2.09088	-1.06811	0.343657	2.24576	0.440977	5.09268	6.08422	1.07407	1.28319	0.837031
3935	ST3935	chrIII	-	54861	56613	ORF-T	YCL038C	ATG22	309	34	776	101	290.196	826.284	1753	-0.294735	0.744729	0.424239	1.52843	0.165542	0.471354	0.351206	0.487252	0.222285	0.308392	0.720788
3934	ST3934	chrIII	-	48549	50277	ORF-T	YCL043C, YCL041C	PDI1, YCL041C	6813	255	5024	816	6398.39	5349.55	1729	2.19497	8.97977	2.15906	8.66299	3.70063	3.09401	1.19606	1.03657	0.412107	0.357153	1.15387
3933	ST3933	chrIII	-	46941	48421	ORF-T	YCL044C	MGR1	685	73	520	112	643.314	553.696	1481	-0.668555	0.512449	0.0906473	1.09488	0.434378	0.373866	1.16185	0.46804	0.847652	0.341467	2.48238
3932	ST3932	chrIII	-	44581	46941	ORF-T	YCL045C	YCL045C	1782	9	1146	53	1673.56	1220.26	2361	0.93794	2.55471	0.276274	1.31821	0.708833	0.51684	1.37147	1.93802	0.277461	0.392078	0.707669
3931	ST3931	chrIII	-	43509	44453	ORF-T	YCL047C	YCL047C	376	25	335	60	353.118	356.708	945	0.405391	1.49989	-0.96398	0.381372	0.37367	0.377468	0.989937	3.93288	0.249132	0.989765	0.251708
3930	ST3930	chrIII	-	39597	40805	ORF-T	YCL049C	YCL049C	449	161	1110	176	421.676	1181.93	1209	0.0417009	1.04258	0.731669	2.07855	0.348781	0.977607	0.35677	0.501592	0.334535	0.470332	0.711275
3929	ST3929	chrIII	-	37837	38869	ORF-T	YCL050C	APA1	1811	14	562	35	1700.79	598.417	1033	1.21838	3.3817	0.770981	2.16189	1.64646	0.5793	2.84215	1.56424	0.486872	0.26796	1.81696
3928	ST3928	chrIII	-	34005	35453	ORF-T	YCL052C	PBN1	814	170	1415	44	764.463	1506.69	1449	1.06303	2.89514	1.04719	2.84963	0.52758	1.03981	0.507379	1.01597	0.18223	0.364895	0.499403
3923	ST3923	chrIII	-	26981	27389	ORF-T	YCL056C	YCL056C	271	44	383	68	254.508	407.818	409	-0.0165342	0.983602	1.02786	2.79508	0.622269	0.99711	0.624073	0.351905	0.632643	0.356738	1.77341
3922	ST3922	chrIII	-	23917	24373	other	YCL058C, YCL057C-A	FYV5, YCL057C-A	596	458	2002	115	559.73	2131.73	457	1.36943	3.93311	1.8206	6.17559	1.22479	4.66461	0.262571	0.63688	0.311405	0.755331	0.412277
3921	ST3921	chrIII	-	22325	23429	ORF-T	YCL059C	KRR1	1708	101	182	129	1604.06	193.793	1105	1.61194	5.01253	0.715063	2.04431	1.45164	0.175379	8.27715	2.45194	0.289601	0.0857885	3.37576
3920	ST3920	chrIII	-	18605	22173	ORF-T	YCL061C	MRC1	664	68	606	59	623.592	645.268	3569	-1.41186	0.243689	-1.27781	0.278646	0.174725	0.180798	0.966407	0.874546	0.716998	0.648844	1.10504
3919	ST3919	chrIII	-	15237	16949	ORF-T	YCL064C	CHA1	2119	21	519	17	1990.05	552.631	1713	2.13965	8.49646	2.17876	8.83534	1.16173	0.32261	3.60104	0.961645	0.136731	0.0365136	3.74467
3955	ST3955	chrIII	-	117358	118406	ORF-T	YCR002C	CDC10	1033	12	806	21	970.136	858.228	1049	0.789448	2.20218	0.413685	1.51238	0.92482	0.818139	1.13039	1.4561	0.419956	0.540961	0.776315
3957	ST3957	chrIII	-	119430	120526	ORF-T	YCR004C	YCP4	779	125	5056	107	731.593	5383.62	1097	1.43708	4.2084	2.33778	10.3583	0.666904	4.90759	0.135892	0.406285	0.15847	0.473785	0.334475
3958	ST3958	chrIII	-	120846	122398	ORF-T	YCR005C	CIT2	1445	56	3826	659	1357.06	4073.92	1553	1.99356	7.34163	2.37729	10.7757	0.873833	2.62326	0.33311	0.681313	0.119024	0.243442	0.488924
3959	ST3959	chrIII	-	122398	123654	other	YCR006C, tP(AGG)C	YCR006C, SUF2	9996	363	15053	825	9387.69	16028.4	1257	-1.74167	0.175228	-0.457952	0.632578	7.46833	12.7513	0.58569	0.277006	42.6207	20.1577	2.11436
3961	ST3961	chrIII	-	125750	127534	ORF-T	YCR007C	YCR007C	471	747	813	701	442.337	865.682	1785	-1.53525	0.215403	-0.323457	0.723643	0.247808	0.484976	0.510969	0.297664	1.15044	0.670186	1.7166
3963	ST3963	chrIII	-	130542	131614	ORF-T	YCR009C	RVS161	1820	35	1551	79	1709.24	1651.5	1073	1.90652	6.72965	1.84145	6.30566	1.59296	1.53915	1.03496	1.06724	0.236707	0.24409	0.969756
3964	ST3964	chrIII	-	132094	133238	ORF-T	YCR010C	ADY2	12	207	414	131	11.2697	440.827	1145	-4.3487	0.0129237	1.83124	6.24159	0.00984256	0.385002	0.025565	0.00207057	0.761592	0.0616832	12.3468
3965	ST3965	chrIII	-	133670	137022	ORF-T	YCR011C	ADP1	1673	20	3329	97	1571.19	3544.72	3353	0.780798	2.18321	1.09331	2.98414	0.468592	1.05718	0.443248	0.731605	0.214634	0.354265	0.605857
3966	ST3966	chrIII	-	139174	141094	ORF-T	YCR014C	POL4	244	1072	415	504	229.151	441.892	1921	-0.530524	0.588296	-0.173496	0.840721	0.119287	0.230032	0.518569	0.699752	0.202768	0.273613	0.741075
3967	ST3967	chrIII	-	141094	142206	ORF-T	YCR015C	YCR015C	1450	54	1036	80	1361.76	1103.13	1113	-0.331237	0.718035	0.283644	1.32796	1.2235	0.991134	1.23445	0.540705	1.70396	0.746358	2.28303
3969	ST3969	chrIII	-	144574	147678	ORF-T	YCR017C	CWH43	2207	159	1877	50	2072.69	1998.63	3105	0.742158	2.10046	0.381232	1.46409	0.667533	0.643681	1.03706	1.43466	0.317803	0.439646	0.72286
3971	ST3971	chrIII	-	153918	155118	ORF-T	YCR020C, YCR020C-A	PET18, MAK31	857	44	492	86	804.847	523.881	1201	-1.52287	0.218086	-0.479464	0.619115	0.670147	0.436204	1.53632	0.352255	3.07286	0.704561	4.36138
3972	ST3972	chrIII	-	156030	157214	ORF-T	YCR021C	HSP30	175	258	155	265	164.35	165.044	1185	2.11689	8.30523	0.115614	1.12256	0.138692	0.139278	0.995797	7.39845	0.0166994	0.124071	0.134595
3973	ST3973	chrIII	-	158302	160454	ORF-T	YCR023C	YCR023C	1182	196	1668	241	1110.07	1776.09	2153	0.0904125	1.09463	0.0866114	1.09047	0.515591	0.824935	0.625009	1.00381	0.471021	0.756493	0.622637
3974	ST3974	chrIII	-	160646	162254	ORF-T	YCR024C	SLM5	570	298	560	152	535.312	596.288	1609	-1.82083	0.161892	-1.05129	0.349485	0.332699	0.370595	0.897742	0.463229	2.05507	1.0604	1.93801
3975	ST3975	chrIII	-	162414	163262	other	YCR024C-B, YCR024C-A	YCR024C-B, PMP1	6901	35	4935	25	6481.03	5254.78	849	2.72633	15.2768	2.91275	18.4073	7.63373	6.18938	1.23336	0.82993	0.499695	0.336246	1.4861
3976	ST3976	chrIII	-	163454	166414	other	YCR025C, YCR026C	YCR025C, NPP1	1707	440	1540	490	1603.12	1639.79	2961	-0.305201	0.736975	0.345597	1.41283	0.541411	0.553796	0.977636	0.52163	0.73464	0.391976	1.8742
3977	ST3977	chrIII	-	166734	168182	ORF-T	YCR027C	RHB1	971	44	576	27	911.909	613.324	1449	-0.864291	0.42135	-0.675366	0.50897	0.629337	0.423274	1.48683	0.827849	1.49362	0.831629	1.79602
3978	ST3978	chrIII	-	170150	172542	ORF-T	YCR028C	FEN2	1601	29	796	45	1503.57	847.58	2393	-0.198755	0.819751	-0.352365	0.703024	0.62832	0.354191	1.77396	1.16604	0.766477	0.503812	1.52136
3979	ST3979	chrIII	-	172742	173518	ORF-T	YCR028C-A	RIM1	1068	179	1026	183	1003.01	1092.48	777	1.70173	5.48342	2.11333	8.27575	1.29087	1.40603	0.918097	0.662588	0.235413	0.169897	1.38562
3980	ST3980	chrIII	-	173654	176510	ORF-T	YCR030C	SYP1	888	105	1888	61	833.96	2010.34	2857	-0.118859	0.887933	0.418242	1.51929	0.291901	0.703654	0.414835	0.58444	0.328742	0.463148	0.709799
3982	ST3982	chrIII	-	177390	178254	ORF-T	YCR031C	RPS14A	8929	219	1898	103	8385.62	2020.99	865	2.64484	14.0811	2.1755	8.80655	9.69436	2.3364	4.14927	1.59894	0.688464	0.265303	2.59501
3985	ST3985	chrIII	-	191638	193046	ORF-T	YCR035C	RRP43	1215	380	532	130	1141.06	566.473	1409	0.634667	1.88639	0.24466	1.27719	0.809837	0.402039	2.01432	1.47699	0.429304	0.314785	1.3638
3986	ST3986	chrIII	-	194310	197222	ORF-T	YCR037C	PHO87	1554	81	1483	191	1459.43	1579.1	2913	-0.599604	0.549029	0.272632	1.31342	0.501006	0.542086	0.924218	0.418016	0.91253	0.41273	2.21096
3987	ST3987	chrIII	-	201153	205414	ORF-T	YCR042C	TAF2	1140	825	1180	490	1070.62	1256.46	4262	-0.422733	0.655253	-0.452239	0.636202	0.251202	0.294806	0.852094	1.02995	0.383367	0.463384	0.82732
3988	ST3988	chrIII	-	206158	206694	ORF-T	YCR043C	YCR043C	676	12	321	24	634.862	341.801	537	0.936033	2.54985	-0.49718	0.608243	1.18224	0.6365	1.8574	4.19215	0.463651	1.04646	0.443068
3989	ST3989	chrIII	-	206854	207974	ORF-T	YCR044C	PER1	1045	481	727	134	981.406	774.109	1121	0.515648	1.67472	-0.323629	0.723518	0.875473	0.690552	1.26779	2.31469	0.522757	0.954436	0.547713
3990	ST3990	chrIII	-	209774	210446	ORF-T	YCR046C	IMG1	793	220	853	184	744.741	908.274	673	0.111491	1.11794	0.563477	1.75677	1.1066	1.34959	0.819953	0.636364	0.989852	0.768222	1.2885
3991	ST3991	chrIII	-	210542	211646	ORF-T	YCR047C	BUD23	1505	96	317	628	1413.41	337.541	1105	0.299371	1.34901	0.381429	1.46438	1.27911	0.305467	4.18737	0.921218	0.948182	0.208599	4.54547
3992	ST3992	chrIII	-	218246	220166	ORF-T	YCR054C	CTR86	715	301	360	122	671.488	383.328	1921	-1.09926	0.333116	-1.45334	0.233788	0.349551	0.199546	1.75173	1.42487	1.04934	0.853535	1.2294
3993	ST3993	chrIII	-	220350	223318	ORF-T	YCR057C	PWP2	3843	16	494	39	3609.13	526.011	2969	-0.072753	0.92983	-0.874544	0.417052	1.21561	0.177168	6.86133	2.22953	1.30734	0.424809	3.07748
3994	ST3994	chrIII	-	223318	224262	ORF-T	YCR059C	YIH1	836	222	385	27	785.125	409.948	945	0.109607	1.11584	0.341165	1.40659	0.83082	0.433807	1.91518	0.793297	0.744569	0.308412	2.41421
3996	ST3996	chrIII	-	232998	236430	ORF-T	YCR067C	SED4	1381	49	985	81	1296.96	1048.83	3433	0.206406	1.22925	-0.30715	0.73554	0.377791	0.305513	1.23658	1.67122	0.307335	0.415359	0.739925
3998	ST3998	chrIII	-	240006	240582	ORF-T	YCR071C	IMG2	766	126	667	259	719.384	710.221	577	-0.436548	0.646264	0.568122	1.76495	1.24677	1.23089	1.0129	0.366165	1.92919	0.697405	2.76624
3999	ST3999	chrIII	-	240686	242382	ORF-T	YCR072C	RSA4	1860	286	214	737	1746.81	227.867	1697	-0.529241	0.589052	-1.27751	0.278731	1.02935	0.134276	7.66591	2.11333	1.74747	0.481741	3.6274
4000	ST4000	chrIII	-	242494	246678	ORF-T	YCR073C	SSK22	739	504	413	287	694.028	439.762	4185	-1.68284	0.185846	-2.21916	0.1087	0.165837	0.105081	1.57819	1.70971	0.892336	0.966701	0.923073
4001	ST4001	chrIII	-	248030	248846	ORF-T	YCR075C	ERS1	786	117	967	322	738.167	1029.66	817	0.162601	1.17657	0.170442	1.18583	0.90351	1.26029	0.716903	0.992189	0.76792	1.0628	0.722547
4002	ST4002	chrIII	-	249198	250054	ORF-T	YCR076C	YCR076C	538	147	924	194	505.26	983.874	857	0.529348	1.69783	1.23093	3.42443	0.589568	1.14804	0.513541	0.495798	0.347249	0.335252	1.03579
4003	ST4003	chrIII	-	250110	252670	ORF-T	YCR077C	PAT1	2889	13	2390	23	2713.19	2544.87	2561	1.09809	2.99842	0.977685	2.6583	1.05943	0.993702	1.06614	1.12795	0.353328	0.373811	0.945203
4004	ST4004	chrIII	-	259982	262702	ORF-T	YCR084C	TUP1	2777	71	2150	235	2608	2289.32	2721	1.011	2.74834	0.897417	2.45326	0.958472	0.841352	1.13921	1.12028	0.348747	0.342953	1.01689
4005	ST4005	chrIII	-	263974	264502	ORF-T	YCR087C-A	LUG1	621	82	64	98	583.209	68.1471	529	1.22775	3.41355	-0.0987451	0.905974	1.10247	0.128823	8.55808	3.76782	0.32297	0.142192	2.27136
4006	ST4006	chrIII	-	272254	272902	ORF-T	YCR090C	YCR090C	611	35	262	35	573.817	278.977	649	1.43042	4.18046	0.981501	2.66846	0.884156	0.429857	2.05686	1.56662	0.211497	0.161088	1.31293
4007	ST4007	chrIII	-	276614	279846	ORF-T	YCR092C	MSH3	702	3029	377	5675	659.279	401.429	3233	-1.44359	0.236078	-1.45964	0.23232	0.203922	0.124166	1.64233	1.01618	0.863789	0.534461	1.61619
4008	ST4008	chrIII	-	288086	289302	ORF-T	YCR095C	OCA4	607	35	394	63	570.061	419.531	1217	0.583536	1.79236	0.354204	1.42505	0.468415	0.344725	1.3588	1.25776	0.261339	0.241905	1.08034
4009	ST4009	chrIII	-	296822	298798	ORF-T	YCR098C	GIT1	253	10	579	20	237.603	616.519	1977	-2.74036	0.0645469	-1.01181	0.363561	0.120184	0.311846	0.385395	0.177541	1.86196	0.857752	2.17074
4010	ST4010	chrIII	-	300614	302990	ORF-T	YCR099C, YCR100C, YCR101C	YCR099C, YCR100C, YCR101C	400	13	276	183	375.658	293.885	2377	-1.42498	0.240514	-1.65555	0.190987	0.158039	0.123637	1.27825	1.25932	0.657087	0.647356	1.01503
3960	ST3960	chrIII	-	124062	125030	other	YCRCdelta6	YCRCdelta6	1767	205	846	137	1659.47	900.82	969	-2.62124	0.0727124	-2.52591	0.0799852	1.71256	0.929639	1.84217	0.909073	23.5525	11.6226	2.02643
365	ST0365	chrIV	+	57033	57337	CUTs	CUT049	CUT049	467	24	199	150	438.58	211.895	305	-4.94271	0.0071352	-5.0489	0.00641638	1.43797	0.694738	2.0698	1.11203	201.532	108.276	1.86128
368	ST0368	chrIV	+	73601	74785	CUTs	CUT050	CUT050	701	364	573	1955	658.34	610.13	1185	-4.25142	0.014244	-4.72744	0.00884912	0.555561	0.514878	1.07902	1.60965	39.0033	58.184	0.670344
395	ST0395	chrIV	+	163433	163753	CUTs	CUT051	CUT051	277	239	9	154	260.143	9.58319	321	-4.51618	0.0109307	-4.94631	0.00710959	0.810414	0.0298542	27.1458	1.53746	74.1411	4.19915	17.6562
406	ST0406	chrIV	+	192401	192569	CUTs	CUT052	CUT052	133	1	117	1	124.906	124.582	169	-2.55644	0.0775801	-3.43599	0.0321934	0.73909	0.737169	1.00261	2.40981	9.52679	22.8981	0.416051
437	ST0437	chrIV	+	300161	300545	CUTs	CUT053	CUT053	128	225	67	107	120.21	71.3415	385	-4.73382	0.0087928	-4.92276	0.00727904	0.312235	0.185303	1.685	1.20796	35.5103	25.457	1.39491
442	ST0442	chrIV	+	310457	311153	CUTs	CUT054	CUT054	1077	174	292	122	1011.46	310.921	697	-4.55266	0.0105391	-4.87416	0.0076415	1.45116	0.446085	3.2531	1.37919	137.693	58.3767	2.3587
449	ST0449	chrIV	+	329585	329697	CUTs	CUT055	CUT055	21	58	27	122	19.722	28.7496	113	-0.72844	0.482661	-1.65005	0.192041	0.174531	0.254421	0.685994	2.51333	0.361602	1.32483	0.272943
468	ST0468	chrIV	+	413569	413945	CUTs	CUT056	CUT056	16	8	172	69	15.0263	183.145	377	-4.45093	0.0116677	-3.52475	0.0294591	0.0398576	0.485797	0.0820458	0.396064	3.41606	16.4906	0.207153
470	ST0470	chrIV	+	417273	417633	CUTs	CUT057	CUT057	198	35	68	107	185.951	72.4063	361	-3.88097	0.0206308	-4.89297	0.0074991	0.515099	0.200572	2.56815	2.7511	24.9675	26.7461	0.933502
471	ST0471	chrIV	+	421937	422529	CUTs	CUT058	CUT058	80	12	382	33	75.1315	406.753	593	-5.02737	0.00655602	-4.90004	0.00744629	0.126697	0.685925	0.18471	0.880441	19.3253	92.1163	0.209793
472	ST0472	chrIV	+	423721	424097	CUTs	CUT059	CUT059	112	26	153	31	105.184	162.914	377	-3.89135	0.0204177	-4.77088	0.00847295	0.279003	0.432133	0.645641	2.40975	13.6648	51.0016	0.267929
480	ST0480	chrIV	+	442625	442841	CUTs	CUT060	CUT060	47	1	202	48	44.1398	215.089	217	-4.88533	0.00755662	-3.60669	0.0271416	0.203409	0.991196	0.205216	0.278415	26.918	36.5195	0.737086
485	ST0485	chrIV	+	453825	454065	CUTs	CUT061	CUT061	398	12	215	17	373.779	228.932	241	-1.86412	0.155033	-4.62984	0.00975636	1.55095	0.949925	1.63271	15.8904	10.004	97.3647	0.102748
496	ST0496	chrIV	+	482602	483810	CUTs	CUT062	CUT062	467	48	196	644	438.58	208.701	1209	-4.62273	0.00982591	-4.50736	0.0110276	0.362763	0.172623	2.10148	0.891031	36.919	15.6537	2.35848
498	ST0498	chrIV	+	486114	486402	CUTs	CUT063	CUT063	47	353	49	76	44.1398	52.1752	289	-4.53819	0.0106927	-3.80553	0.0222474	0.152733	0.180537	0.845992	0.480629	14.2838	8.11498	1.76018
503	ST0503	chrIV	+	501674	502362	CUTs	CUT064	CUT064	356	93	447	159	334.335	475.965	689	-4.43806	0.0118189	-4.81212	0.00813059	0.485247	0.690806	0.702437	1.45363	41.057	84.9638	0.48323
512	ST0512	chrIV	+	542547	543243	CUTs	CUT065	CUT065	748	112	171	342	702.48	182.081	697	-3.72499	0.0241133	-4.69823	0.00911135	1.00786	0.261235	3.85807	2.64651	41.797	28.6714	1.45779
518	ST0518	chrIV	+	563195	563459	CUTs	CUT066	CUT066	91	4	214	9	85.4621	227.867	265	-4.04778	0.0174612	-3.37216	0.0343155	0.322499	0.859876	0.375053	0.508841	18.4695	25.0579	0.737072
528	ST0528	chrIV	+	587971	588659	CUTs	CUT067	CUT067	401	141	290	3345	376.597	308.792	689	-4.52001	0.0108889	-4.76969	0.00848302	0.546585	0.448174	1.21958	1.28362	50.1963	52.8319	0.950114
559	ST0559	chrIV	+	715644	716188	CUTs	CUT068	CUT068	97	164	69	245	91.097	73.4711	545	-4.8196	0.00807001	-4.9837	0.0068487	0.16715	0.134809	1.2399	1.17833	20.7125	19.6839	1.05226
562	ST0562	chrIV	+	727860	728156	CUTs	CUT069	CUT069	85	71	57	36	79.8273	60.6936	297	-4.89797	0.00746169	-4.86771	0.007691	0.268779	0.204355	1.31525	0.970186	36.0211	26.5707	1.35567
579	ST0579	chrIV	+	791956	792108	CUTs	CUT070	CUT070	43	36	34	66	40.3832	36.2032	153	-1.45856	0.232571	-1.51754	0.21925	0.263942	0.236622	1.11546	1.06076	1.13489	1.07923	1.05157
580	ST0580	chrIV	+	794484	795252	CUTs	CUT071	CUT071	563	35	514	88	528.738	547.307	769	-4.2021	0.0149641	-4.50035	0.0111051	0.687566	0.711712	0.966073	1.3475	45.9476	64.0887	0.716938
581	ST0581	chrIV	+	795252	796068	CUTs	CUT072	CUT072	15	192	71	258	14.0872	75.6007	817	-3.77426	0.0229541	-3.4254	0.0325363	0.0172426	0.0925346	0.186336	0.705492	0.751174	2.84404	0.264123
612	ST0612	chrIV	+	915309	915429	CUTs	CUT073	CUT073	44	13	25	8	41.3223	26.62	121	-4.95156	0.00707236	-4.65078	0.00955419	0.341507	0.22	1.55231	0.740236	48.2876	23.0265	2.09704
628	ST0628	chrIV	+	963277	963405	CUTs	CUT074	CUT074	34	1	66	0	31.9309	70.2767	129	-3.998	0.0183522	-4.77701	0.00842115	0.247526	0.544781	0.454359	2.1793	13.4875	64.692	0.208488
632	ST0632	chrIV	+	974581	975013	CUTs	CUT075	CUT075	206	11	42	61	193.464	44.7216	433	-5.07746	0.00623574	-5.06178	0.00633425	0.446798	0.103283	4.32596	0.984447	71.6512	16.3055	4.3943
644	ST0644	chrIV	+	1030509	1030877	CUTs	CUT076	CUT076	351	143	266	198	329.64	283.237	369	-4.01242	0.0180896	-3.81551	0.0220264	0.893332	0.767579	1.16383	0.821267	49.3838	34.8481	1.41712
652	ST0652	chrIV	+	1061301	1061485	CUTs	CUT077	CUT077	108	64	14	27	101.428	14.9072	185	-4.0949	0.0166574	-3.44329	0.0319594	0.548257	0.0805794	6.80394	0.521206	32.9137	2.52131	13.0542
655	ST0655	chrIV	+	1072749	1073285	CUTs	CUT078	CUT078	336	286	422	317	315.552	449.345	537	-4.07495	0.0169931	-4.75758	0.00858637	0.587621	0.83677	0.702249	1.97907	34.58	97.4532	0.354837
660	ST0660	chrIV	+	1090389	1091397	CUTs	CUT079	CUT079	64	144	64	211	60.1052	68.1471	1009	-5.07238	0.0062675	-4.68183	0.00926207	0.0595691	0.0675393	0.881992	0.676685	9.50444	7.29203	1.3034
661	ST0661	chrIV	+	1092757	1093253	CUTs	CUT080	CUT080	283	68	167	105	265.778	177.821	497	-4.12819	0.016112	-4.59631	0.010089	0.534764	0.35779	1.49463	1.59699	33.1905	35.4634	0.935908
665	ST0665	chrIV	+	1106077	1106853	CUTs	CUT081	CUT081	415	122	140	142	389.745	149.072	777	-4.91756	0.00731696	-5.10663	0.00605647	0.501602	0.191856	2.61448	1.20812	68.5534	31.6778	2.16408
677	ST0677	chrIV	+	1149677	1149981	CUTs	CUT082	CUT082	96	280	81	159	90.1578	86.2487	305	-4.97672	0.00689665	-5.05002	0.00640918	0.295599	0.282783	1.04532	1.07606	42.8613	44.1215	0.971437
678	ST0678	chrIV	+	1153877	1154069	CUTs	CUT083	CUT083	276	16	18	1489	259.204	19.1664	193	-3.23515	0.0393543	-4.36899	0.012664	1.34302	0.0993077	13.5239	3.10756	34.1265	7.84171	4.35192
679	ST0679	chrIV	+	1156637	1157357	CUTs	CUT084	CUT084	15	13	159	203	14.0872	169.303	721	-4.92577	0.00725714	-4.44927	0.0116871	0.0195384	0.234817	0.0832068	0.620955	2.6923	20.0921	0.133998
682	ST0682	chrIV	+	1165893	1166141	CUTs	CUT085	CUT085	172	15	26	99	161.533	27.6848	249	-3.2198	0.039963	-3.39242	0.0336272	0.648726	0.111184	5.83472	1.18841	16.2332	3.30637	4.90967
691	ST0691	chrIV	+	1189213	1189605	CUTs	CUT086	CUT086	119	286	281	1067	111.758	299.209	393	-2.70906	0.0665996	-1.9163	0.147151	0.284372	0.761345	0.373513	0.452595	4.26987	5.17391	0.825269
706	ST0706	chrIV	+	1238333	1239397	CUTs	CUT087	CUT087	164	354	211	847	154.02	224.673	1065	-3.94634	0.0193254	-4.60022	0.0100496	0.144619	0.21096	0.685529	1.92299	7.4834	20.9919	0.356491
708	ST0708	chrIV	+	1239997	1241021	CUTs	CUT088	CUT088	913	410	403	710	857.439	429.114	1025	-4.54605	0.010609	-4.87883	0.00760589	0.836526	0.418648	1.99816	1.39484	78.8505	55.0426	1.43254
709	ST0709	chrIV	+	1242725	1243149	CUTs	CUT089	CUT089	334	78	2078	23	313.674	2212.65	425	-3.21476	0.0401651	-0.765566	0.465071	0.738057	5.20624	0.141764	0.0863634	18.3756	11.1945	1.64148
721	ST0721	chrIV	+	1270837	1270997	CUTs	CUT090	CUT090	477	6	72	7	447.972	76.6655	161	-3.18134	0.0415301	-4.18232	0.015263	2.78243	0.476183	5.8432	2.72097	66.998	31.1985	2.14747
731	ST0731	chrIV	+	1302221	1302709	CUTs	CUT091	CUT091	1130	39	324	20	1061.23	344.995	489	-2.17162	0.113993	-4.0566	0.0173078	2.17021	0.705511	3.07608	6.5862	19.0382	40.7626	0.46705
735	ST0735	chrIV	+	1319445	1319757	CUTs	CUT092	CUT092	475	278	404	395	446.094	430.179	313	-3.42259	0.032628	-3.44549	0.0318892	1.42522	1.37437	1.037	1.02317	43.6809	43.0984	1.01352
738	ST0738	chrIV	+	1323461	1324421	CUTs	CUT093	CUT093	169	743	132	391	158.715	140.553	961	-2.57639	0.0760482	-4.21244	0.0148102	0.165156	0.146258	1.12922	5.13485	2.17174	9.87546	0.219912
741	ST0741	chrIV	+	1334205	1334573	CUTs	CUT094	CUT094	294	21	578	28	276.108	615.454	369	-4.94462	0.00712162	-4.72197	0.00889761	0.748261	1.6679	0.448626	0.800397	105.069	187.454	0.560504
747	ST0747	chrIV	+	1359157	1359485	CUTs	CUT095	CUT095	215	37	73	7	201.916	77.7303	329	-4.30817	0.0134581	-5.1237	0.00595393	0.613726	0.236262	2.59765	2.26037	45.6028	39.6818	1.14921
749	ST0749	chrIV	+	1360941	1361045	CUTs	CUT096	CUT096	287	44	75	78	269.534	79.8599	105	0.0610208	1.06292	-4.52247	0.0108621	2.56699	0.760571	3.37509	97.8556	2.41504	70.0204	0.0344905
751	ST0751	chrIV	+	1367021	1367429	CUTs	CUT097	CUT097	166	10	66	10	155.898	70.2767	409	-3.94802	0.0192928	-3.38735	0.0337982	0.381169	0.171826	2.21834	0.570824	19.757	5.08387	3.88621
771	ST0771	chrIV	+	1427405	1427893	CUTs	CUT098	CUT098	373	217	337	289	350.301	358.837	489	-4.77296	0.00845528	-4.84473	0.00786976	0.716362	0.733819	0.976211	1.0744	84.7236	93.2453	0.90861
781	ST0781	chrIV	+	1460565	1460757	CUTs	CUT099	CUT099	10	22	10	35	9.39144	10.648	193	-4.45905	0.0115733	-4.2767	0.0138885	0.0486603	0.0551709	0.881992	0.833304	4.20453	3.97243	1.05843
791	ST0791	chrIV	+	1484309	1485581	CUTs	CUT100	CUT100	46	8	52	17	43.2006	55.3696	1273	-3.33276	0.0356946	-3.5222	0.0295344	0.0339361	0.0434953	0.780224	1.20858	0.950735	1.4727	0.645571
795	ST0795	chrIV	+	1496805	1497181	CUTs	CUT101	CUT101	120	115	653	555	112.697	695.314	377	-4.57238	0.0103333	-4.45738	0.0115927	0.298932	1.84433	0.162081	0.89137	28.9289	159.095	0.181834
762	ST0762	chrIV	+	1402941	1403053	other	snR13	SNR13	29443	8	78150	4	27651.2	83214.1	113	-0.535757	0.585226	0.77088	2.16167	244.701	736.408	0.33229	0.270729	418.131	340.666	1.22739
366	ST0366	chrIV	+	59129	60697	SUTs	SUT041	SUT041	165	143	45	1184	154.959	47.916	1569	-1.77791	0.168991	-4.47868	0.0113484	0.0987628	0.0305392	3.23397	14.8911	0.584428	2.69105	0.217175
370	ST0370	chrIV	+	80713	82585	SUTs	SUT042	SUT042	278	22	278	17	261.082	296.014	1873	-2.90806	0.0545817	-2.83536	0.0586975	0.139392	0.158043	0.881992	0.929881	2.55383	2.6925	0.9485
443	ST0443	chrIV	+	312881	314161	SUTs	SUT043	SUT043	815	24	64	1747	765.403	68.1471	1281	-0.709134	0.49207	-4.19769	0.0150302	0.597504	0.0531984	11.2316	32.7387	1.21427	3.53942	0.343069
444	ST0444	chrIV	+	314921	316961	SUTs	SUT044	SUT044	109	1001	2976	4302	102.367	3168.84	2041	-4.58727	0.0101806	-4.39245	0.0123704	0.0501552	1.55259	0.0323041	0.822986	4.92653	125.509	0.0392523
445	ST0445	chrIV	+	320249	321009	SUTs	SUT045	SUT045	303	275	202	411	284.561	215.089	761	-2.44628	0.0866152	-1.8365	0.159373	0.37393	0.282641	1.32299	0.543473	4.31714	1.77345	2.43432
447	ST0447	chrIV	+	323785	324457	SUTs	SUT046	SUT046	186	287	25	194	174.681	26.62	673	-3.42072	0.0326889	-4.38535	0.0124586	0.259555	0.0395542	6.56202	2.62381	7.94017	3.17486	2.50095
450	ST0450	chrIV	+	330601	330993	SUTs	SUT047	SUT047	343	120	168	108	322.126	178.886	393	-1.08342	0.338437	-1.27704	0.278863	0.81966	0.455181	1.80073	1.21363	2.4219	1.63228	1.48375
462	ST0462	chrIV	+	381593	386505	SUTs	SUT048	SUT048	177	3532	215	166	166.229	228.932	4913	-4.548	0.0105884	-4.83142	0.00797516	0.0338344	0.0465972	0.726105	1.32767	3.19543	5.84278	0.546903
466	ST0466	chrIV	+	407601	408201	SUTs	SUT049	SUT049	119	119	70	54	111.758	74.5359	601	-1.77887	0.168829	-2.37787	0.0927476	0.185954	0.12402	1.49939	1.82031	1.10143	1.33718	0.823698
488	ST0488	chrIV	+	460577	460721	SUTs	SUT050	SUT050	0	107	1	86	0	1.0648	145	-2.25496	0.104877	-2.42104	0.0888294	0	0.00734344	0	1.18066	0	0.082669	0
497	ST0497	chrIV	+	485482	486114	SUTs	SUT051	SUT051	255	272	137	176	239.482	145.877	633	-4.30263	0.0135329	-2.92487	0.0536715	0.378328	0.230454	1.64166	0.252143	27.9562	4.29379	6.51085
502	ST0502	chrIV	+	501458	501674	SUTs	SUT052	SUT052	66	33	38	36	61.9835	40.4624	217	-3.124	0.0439808	-1.94645	0.142781	0.285638	0.186463	1.53188	0.308031	6.49461	1.30594	4.97314
505	ST0505	chrIV	+	506331	507771	SUTs	SUT053	SUT053	773	459	438	536	725.958	466.382	1441	-1.29731	0.273267	-2.51249	0.0810664	0.503788	0.323652	1.55657	3.3709	1.84358	3.99243	0.461768
511	ST0511	chrIV	+	542179	542523	SUTs	SUT054	SUT054	98	129	59	172	92.0361	62.8232	345	-3.31865	0.0362017	-2.3459	0.0957614	0.266771	0.182096	1.465	0.37804	7.36903	1.90156	3.87526
513	ST0513	chrIV	+	544043	544730	SUTs	SUT055	SUT055	365	8	318	16	342.788	338.606	688	-1.91258	0.147699	-3.02895	0.0483664	0.498238	0.49216	1.01235	3.05375	3.37333	10.1757	0.33151
517	ST0517	chrIV	+	556739	557099	SUTs	SUT056	SUT056	157	107	67	103	147.446	71.3415	361	-3.53674	0.029108	-2.23736	0.10674	0.408437	0.197622	2.06676	0.272701	14.0318	1.85144	7.57884
538	ST0538	chrIV	+	614196	616916	SUTs	SUT057	SUT057	604	1094	592	2693	567.243	630.361	2721	-3.07306	0.0462794	-4.55546	0.0105096	0.208469	0.231665	0.89987	4.40352	4.50456	22.0431	0.204352
548	ST0548	chrIV	+	680212	680420	SUTs	SUT058	SUT058	27	89	26	115	25.3569	27.6848	209	-2.61853	0.0729097	-2.05251	0.128412	0.121325	0.132463	0.915915	0.567781	1.66404	1.03155	1.61315
560	ST0560	chrIV	+	718644	719788	SUTs	SUT059	SUT059	165	150	157	211	154.959	167.173	1145	-2.63655	0.0716081	-2.52482	0.0800728	0.135335	0.146003	0.926934	0.894288	1.88994	1.82338	1.03651
561	ST0561	chrIV	+	722292	726500	SUTs	SUT060	SUT060	141	1623	1462	1166	132.419	1556.74	4209	-3.76317	0.0232101	-2.85689	0.0574473	0.031461	0.369859	0.0850621	0.404025	1.35549	6.43823	0.210537
592	ST0592	chrIV	+	831709	832749	SUTs	SUT061	SUT061	508	583	65	782	477.085	69.2119	1041	-2.88903	0.0556304	-4.51223	0.0109739	0.458295	0.066486	6.89311	5.06932	8.23821	6.05853	1.35977
626	ST0626	chrIV	+	957789	958597	SUTs	SUT062	SUT062	42	207	388	378	39.4441	413.142	809	-4.60922	0.00995955	-2.38786	0.0918263	0.0487566	0.510682	0.0954734	0.108461	4.89546	5.5614	0.880257
631	ST0631	chrIV	+	968029	969693	SUTs	SUT063	SUT063	1062	125	415	1807	997.371	441.892	1665	-1.60958	0.199972	-3.02386	0.0486133	0.599022	0.2654	2.25705	4.11353	2.99552	5.45942	0.548689
633	ST0633	chrIV	+	977053	977309	SUTs	SUT064	SUT064	92	378	439	249	86.4013	467.447	257	-3.07281	0.046291	-1.4645	0.231194	0.336192	1.81886	0.184837	0.200226	7.26257	7.86725	0.92314
641	ST0641	chrIV	+	1014357	1016877	SUTs	SUT065	SUT065	250	121	297	3208	234.786	316.245	2521	-1.99179	0.136451	-4.3482	0.01293	0.0931321	0.125444	0.742417	10.553	0.682531	9.70178	0.0703511
657	ST0657	chrIV	+	1080797	1081045	SUTs	SUT066	SUT066	218	62	101	55	204.733	107.545	249	-0.956638	0.384182	-1.95101	0.14213	0.822223	0.431906	1.90371	2.70303	2.14019	3.03881	0.704285
673	ST0673	chrIV	+	1140661	1140701	SUTs	SUT067	SUT067	10	2	12	2	9.39144	12.7776	41	-4.37171	0.0126297	-2.149	0.116601	0.22906	0.311649	0.734993	0.108315	18.1366	2.67278	6.78569
680	ST0680	chrIV	+	1157357	1158989	SUTs	SUT068	SUT068	14	42	1365	88	13.148	1453.45	1633	-4.7839	0.00836329	0.683777	1.98135	0.00805145	0.89005	0.00904607	0.00422101	0.962713	0.449214	2.1431
681	ST0681	chrIV	+	1162349	1165893	SUTs	SUT069	SUT069	821	5118	1379	293	771.037	1468.36	3545	-3.95138	0.0192281	-2.22124	0.108475	0.2175	0.414205	0.525102	0.177259	11.3116	3.81845	2.96234
683	ST0683	chrIV	+	1166653	1167021	SUTs	SUT070	SUT070	87	191	472	130	81.7055	502.585	369	-0.482814	0.617045	0.939784	2.55943	0.221424	1.36202	0.162571	0.241087	0.358846	0.532158	0.674324
685	ST0685	chrIV	+	1174461	1174853	SUTs	SUT071	SUT071	189	198	93	117	177.498	99.0263	393	-1.47997	0.227644	-0.899379	0.406822	0.45165	0.251975	1.79244	0.559567	1.98401	0.619375	3.20325
693	ST0693	chrIV	+	1196541	1197693	SUTs	SUT072	SUT072	82	210	143	235	77.0098	152.266	1153	-3.1915	0.0411101	-2.2146	0.109197	0.0667908	0.132061	0.505758	0.376476	1.62468	1.20938	1.3434
718	ST0718	chrIV	+	1266965	1267341	SUTs	SUT073	SUT073	282	12	316	17	264.839	336.477	377	-1.90177	0.149305	-1.89133	0.150871	0.70249	0.892511	0.787094	0.989617	4.70507	5.91571	0.795352
728	ST0728	chrIV	+	1295757	1296693	SUTs	SUT074	SUT074	110	339	209	136	103.306	222.543	937	-1.7561	0.172718	-0.38442	0.680845	0.110252	0.237506	0.464206	0.253681	0.638335	0.34884	1.82988
764	ST0764	chrIV	+	1406085	1408117	SUTs	SUT075	SUT075	581	110	416	217	545.643	442.956	2033	-1.92144	0.146396	-2.61469	0.0731907	0.268393	0.217883	1.23182	2.0002	1.83333	2.97692	0.615849
765	ST0765	chrIV	+	1410509	1411909	SUTs	SUT076	SUT076	758	838	995	1292	711.871	1059.48	1401	-3.27252	0.037911	-3.53538	0.0291478	0.508117	0.756228	0.671909	1.30065	13.4029	25.9446	0.516597
776	ST0776	chrIV	+	1445765	1446149	SUTs	SUT077	SUT077	37	76	591	154	34.7483	629.296	385	-4.4457	0.0117289	-3.22243	0.0398583	0.0902554	1.63454	0.0552178	0.294266	7.69511	41.0087	0.187646
779	ST0779	chrIV	+	1456069	1456677	SUTs	SUT078	SUT078	167	101	39	355	156.837	41.5272	609	-1.01126	0.363762	-3.52473	0.0294596	0.257532	0.0681891	3.77673	12.3478	0.707969	2.31466	0.305862
780	ST0780	chrIV	+	1459749	1460565	SUTs	SUT079	SUT079	770	83	723	99	723.141	769.85	817	-3.91928	0.0198553	-3.00399	0.0495886	0.885118	0.942289	0.939327	0.400401	44.5783	19.0021	2.34596
782	ST0782	chrIV	+	1466205	1466373	SUTs	SUT080	SUT080	56	158	50	135	52.5921	53.24	169	-4.45974	0.0115653	-2.73318	0.0650122	0.311196	0.315029	0.987831	0.177895	26.9077	4.8457	5.5529
790	ST0790	chrIV	+	1483725	1484309	SUTs	SUT081	SUT081	129	4	112	0	121.15	119.258	585	-2.40401	0.0903553	-2.49046	0.0828722	0.207093	0.203859	1.01587	1.0903	2.29199	2.45992	0.931734
792	ST0792	chrIV	+	1487541	1488709	SUTs	SUT082	SUT082	61	487	106	424	57.2878	112.869	1169	-4.72808	0.00884341	-3.1931	0.0410445	0.0490058	0.0965515	0.507561	0.215459	5.5415	2.35236	2.35572
797	ST0797	chrIV	+	1500709	1501021	SUTs	SUT083	SUT083	86	22	244	15	80.7664	259.811	313	-1.46106	0.23199	0.935348	2.5481	0.25804	0.830067	0.310866	0.0910442	1.11229	0.325759	3.41445
801	ST0801	chrIV	+	1514341	1515357	SUTs	SUT084	SUT084	108	111	237	169	101.428	252.357	1017	-2.71898	0.0659421	-1.25767	0.284316	0.0997321	0.248139	0.40192	0.231932	1.51242	0.872758	1.73292
803	ST0803	chrIV	+	1521093	1522253	SUTs	SUT085	SUT085	228	6	204	14	214.125	217.219	1161	-1.47695	0.228334	-1.48655	0.226152	0.184431	0.187096	0.985756	1.00965	0.807728	0.827303	0.976339
483	ST0483	chrIV	+	447913	449377	ORF-T	YDL001W	RMD1	543	38	387	19	509.955	412.077	1465	-0.641755	0.526368	-0.306468	0.736042	0.348092	0.281281	1.23752	0.715133	0.66131	0.382154	1.73048
482	ST0482	chrIV	+	444561	446489	ORF-T	YDL003W	MCD1	855	35	610	56	802.968	649.527	1929	0.311571	1.36557	-0.530598	0.588253	0.416261	0.336717	1.23623	2.3214	0.304827	0.572402	0.532539
481	ST0481	chrIV	+	442985	443753	ORF-T	YDL004W	ATP16	1228	88	6499	43	1153.27	6920.13	769	1.62256	5.06604	2.59322	13.3728	1.4997	8.99887	0.166654	0.378832	0.29603	0.672923	0.439916
479	ST0479	chrIV	+	439569	440777	ORF-T	YDL006W	PTC1	598	56	652	88	561.608	694.249	1209	0.697037	2.00779	0.266929	1.30595	0.464523	0.574234	0.808943	1.53742	0.23136	0.439707	0.526169
478	ST0478	chrIV	+	438009	439369	ORF-T	YDL007W	RPT2	2074	10	1792	13	1947.79	1908.12	1361	2.04724	7.74648	1.978	7.22828	1.43114	1.402	1.02079	1.07169	0.184748	0.19396	0.952502
477	ST0477	chrIV	+	433473	434057	ORF-T	YDL008W	APC11	970	931	583	20	910.97	620.778	585	0.531304	1.70115	0.435186	1.54525	1.55721	1.06116	1.46747	1.10089	0.915389	0.686723	1.33298
476	ST0476	chrIV	+	432281	433273	ORF-T	YDL010W	GRX7	796	143	788	129	747.559	839.062	993	0.297596	1.34662	0.494479	1.63964	0.752829	0.844977	0.890946	0.821287	0.559051	0.515342	1.08482
475	ST0475	chrIV	+	428929	431009	ORF-T	YDL013W	SLX5	948	138	825	129	890.309	878.459	2081	-0.422168	0.655624	0.0679344	1.0703	0.427827	0.422133	1.01349	0.612564	0.65255	0.394408	1.6545
474	ST0474	chrIV	+	427217	428585	ORF-T	YDL014W	NOP1	7660	136	973	109	7193.84	1036.05	1369	2.50173	12.2036	1.22342	3.3988	5.25482	0.756793	6.94353	3.59057	0.430595	0.222665	1.93382
473	ST0473	chrIV	+	424097	425785	ORF-T	YDL017W	CDC7	466	144	377	119	437.641	401.429	1689	-0.623368	0.536135	-1.16769	0.311084	0.259113	0.237673	1.09021	1.72344	0.483297	0.764014	0.632576
469	ST0469	chrIV	+	413945	415081	ORF-T	YDL021W	GPM2	109	338	1801	475	102.367	1917.7	1137	-0.770791	0.462647	1.47269	4.36095	0.0900323	1.68663	0.0533799	0.106089	0.194603	0.386759	0.503163
467	ST0467	chrIV	+	411761	413217	ORF-T	YDL022W	GPD1	1918	87	7800	109	1801.28	8305.43	1457	1.53156	4.6254	1.82371	6.19482	1.23629	5.70037	0.21688	0.746655	0.267284	0.920183	0.290468
465	ST0465	chrIV	+	399297	400897	ORF-T	YDL029W	ARP2	2097	60	2562	89	1969.39	2728.02	1601	1.84924	6.35496	1.93411	6.91789	1.2301	1.70394	0.721911	0.918627	0.193565	0.24631	0.785859
464	ST0464	chrIV	+	397457	399169	ORF-T	YDL030W	PRP9	652	76	410	118	612.322	436.568	1713	-0.41995	0.65708	-0.369475	0.691097	0.357456	0.254856	1.40258	0.950777	0.544007	0.36877	1.4752
463	ST0463	chrIV	+	394177	397281	ORF-T	YDL031W	DBP10	2363	52	511	96	2219.2	544.112	3105	0.106848	1.11277	-0.299428	0.741242	0.714717	0.175237	4.07857	1.50122	0.64229	0.236411	2.71684
461	ST0461	chrIV	+	372201	372649	ORF-T	YDL045W-A	MRP10	713	71	969	165	669.61	1031.79	449	0.931858	2.53922	1.38859	4.00919	1.49134	2.29797	0.648979	0.63335	0.58732	0.573176	1.02468
460	ST0460	chrIV	+	371161	372009	ORF-T	YDL046W	NPC2	1166	398	3615	360	1095.04	3849.25	849	1.25535	3.50905	2.2079	9.09663	1.2898	4.53386	0.284482	0.385753	0.367564	0.498411	0.737472
459	ST0459	chrIV	+	369313	370953	ORF-T	YDL047W	SIT4	1618	92	1647	172	1519.54	1753.72	1641	1.3121	3.71395	1.12733	3.08739	0.925981	1.06869	0.866462	1.20294	0.249325	0.346147	0.720285
458	ST0458	chrIV	+	363913	365001	ORF-T	YDL051W	LHP1	2117	36	500	133	1988.17	532.4	1089	1.70014	5.47473	1.20462	3.33548	1.82568	0.488889	3.73435	1.64136	0.333474	0.146572	2.27515
457	ST0457	chrIV	+	352769	355433	ORF-T	YDL056W	MBP1	999	444	929	239	938.205	989.198	2665	-0.470324	0.6248	0.162902	1.17692	0.352047	0.371181	0.94845	0.530876	0.563456	0.315383	1.78657
456	ST0456	chrIV	+	351401	352433	ORF-T	YDL057W	YDL057W	180	180	262	123	169.046	278.977	1033	-1.37383	0.253135	-0.235999	0.789782	0.163646	0.270065	0.605949	0.320512	0.646476	0.341949	1.89056
455	ST0455	chrIV	+	345601	351137	ORF-T	YDL058W	USO1	1989	48	1287	50	1867.96	1370.4	5537	-0.842533	0.430618	-0.899928	0.406599	0.337359	0.247498	1.36308	1.05907	0.78343	0.608703	1.28705
454	ST0454	chrIV	+	341601	344041	ORF-T	YDL060W	TSR1	1589	47	303	81	1492.3	322.634	2441	0.434596	1.54434	-0.391069	0.676334	0.611348	0.132173	4.62536	2.2834	0.395864	0.195426	2.02565
453	ST0453	chrIV	+	337441	338233	ORF-T	YDL064W	UBC9	994	185	670	36	933.509	713.415	793	1.57301	4.82112	1.41108	4.10038	1.17719	0.899641	1.30851	1.17578	0.244173	0.219405	1.11289
452	ST0452	chrIV	+	334681	336185	ORF-T	YDL066W	IDP1	1776	88	2471	99	1667.92	2631.12	1505	1.12254	3.07266	1.67849	5.35743	1.10825	1.74825	0.633921	0.573532	0.360682	0.326323	1.10529
451	ST0451	chrIV	+	330993	333113	ORF-T	YDL070W	BDF2	6954	41	3656	66	6530.81	3892.91	2121	1.90161	6.69665	1.34455	3.83645	3.07912	1.83541	1.67762	1.74554	0.4598	0.478414	0.961091
448	ST0448	chrIV	+	326441	329585	ORF-T	YDL073W	YDL073W	1027	59	611	77	964.501	650.592	3145	0.140894	1.1513	-0.406113	0.666235	0.306678	0.206866	1.4825	1.72807	0.266375	0.3105	0.85789
446	ST0446	chrIV	+	322193	323041	ORF-T	YDL075W	RPL31A	5538	291	1428	90	5200.98	1520.53	849	-1.57864	0.206256	-2.31699	0.0985695	6.12601	1.79097	3.4205	2.09249	29.701	18.1696	1.63465
441	ST0441	chrIV	+	308369	309505	ORF-T	YDL082W	RPL13A	6665	70	1318	33	6259.4	1403.41	1137	-0.436839	0.646075	-2.87046	0.0566728	5.50519	1.23431	4.46015	11.4001	8.52097	21.7795	0.391238
440	ST0440	chrIV	+	305073	306673	ORF-T	YDL084W	SUB2	4789	139	3747	101	4497.56	3989.8	1601	2.64234	14.046	2.25112	9.49835	2.80922	2.49207	1.12726	1.47879	0.200001	0.262369	0.76229
439	ST0439	chrIV	+	303145	305073	ORF-T	YDL085W	NDE2	35	739	1712	823	32.87	1822.94	1929	-4.56286	0.0104322	1.49003	4.43722	0.0170399	0.945016	0.0180314	0.00235106	1.6334	0.212975	7.66945
438	ST0438	chrIV	+	301393	302305	ORF-T	YDL086W	YDL086W	600	887	948	602	563.487	1009.43	913	0.550251	1.73369	1.60251	4.96548	0.617181	1.10562	0.558223	0.349148	0.355993	0.222661	1.59881
436	ST0436	chrIV	+	296537	298329	ORF-T	YDL089W	YDL089W	416	140	578	140	390.684	615.454	1793	-0.546595	0.578917	-0.691287	0.500931	0.217894	0.343254	0.63479	1.15568	0.376382	0.685232	0.549277
435	ST0435	chrIV	+	292769	293329	ORF-T	YDL092W	SRP14	763	118	549	228	716.567	584.575	561	2.25484	9.53376	1.84944	6.35627	1.2773	1.04202	1.22579	1.4999	0.133977	0.163936	0.817249
434	ST0434	chrIV	+	289881	292353	ORF-T	YDL093W	PMT5	851	136	514	138	799.212	547.307	2473	-0.624051	0.53577	-1.23065	0.292103	0.323175	0.221313	1.46026	1.83418	0.603198	0.757653	0.79614
433	ST0433	chrIV	+	286993	289601	ORF-T	YDL095W	PMT1	4462	31	2599	53	4190.46	2767.41	2609	1.44514	4.24244	0.655548	1.9262	1.60616	1.06072	1.51422	2.20249	0.378593	0.550679	0.687501
432	ST0432	chrIV	+	283361	284529	ORF-T	YDL099W	BUG1	668	85	618	64	627.348	658.046	1169	0.632214	1.88177	1.39401	4.03099	0.536654	0.562914	0.95335	0.466827	0.285185	0.139647	2.04219
431	ST0431	chrIV	+	276785	280337	ORF-T	YDL102W	POL3	870	51	507	92	817.055	539.853	3553	-1.36314	0.255856	-1.42693	0.240044	0.229962	0.151943	1.51348	1.06587	0.898796	0.63298	1.41994
430	ST0430	chrIV	+	272345	273665	ORF-T	YDL105W	NSE4	388	110	358	129	364.388	381.198	1321	-2.14825	0.116688	-1.31826	0.2676	0.275843	0.288568	0.955902	0.436055	2.36393	1.07836	2.19216
429	ST0429	chrIV	+	268881	270113	ORF-T	YDL107W	MSS2	378	160	669	219	354.997	712.351	1233	-0.884667	0.412852	-0.0271923	0.973174	0.287913	0.577738	0.498345	0.424232	0.697376	0.593663	1.1747
428	ST0428	chrIV	+	267649	268753	ORF-T	YDL108W	KIN28	701	110	636	132	658.34	677.212	1105	0.450657	1.56934	0.312585	1.36695	0.595783	0.612862	0.972133	1.14806	0.379638	0.448341	0.846762
427	ST0427	chrIV	+	258849	263377	ORF-T	YDL112W	TRM3	2164	246	594	135	2032.31	632.491	4529	0.162323	1.17624	-0.889787	0.410743	0.448732	0.139654	3.21318	2.86369	0.381497	0.340002	1.12204
426	ST0426	chrIV	+	251513	253785	ORF-T	YDL116W	NUP84	1431	9	953	17	1343.92	1014.75	2273	0.614397	1.84854	0.29113	1.33794	0.591252	0.446438	1.32438	1.38163	0.319848	0.333676	0.958558
425	ST0425	chrIV	+	248201	251305	ORF-T	YDL117W	CYK3	1236	70	687	55	1160.78	731.517	3105	-0.322099	0.724626	-0.918706	0.399035	0.373843	0.235593	1.58682	1.81595	0.515911	0.590407	0.873823
424	ST0424	chrIV	+	245841	246601	ORF-T	YDL120W	YFH1	643	72	949	124	603.87	1010.49	761	1.05372	2.86829	1.15197	3.16443	0.793521	1.32785	0.597598	0.906415	0.276653	0.419617	0.659299
423	ST0423	chrIV	+	242241	244993	ORF-T	YDL122W	UBP1	1885	152	1221	74	1770.29	1300.12	2753	0.689611	1.99294	0.534433	1.70648	0.643039	0.472256	1.36163	1.16786	0.322659	0.276742	1.16592
422	ST0422	chrIV	+	241385	242241	ORF-T	YDL123W	SNA4	1238	101	1665	482	1162.66	1772.89	857	0.582215	1.79	1.155	3.17402	1.35666	2.06872	0.655799	0.563953	0.757913	0.651766	1.16286
421	ST0421	chrIV	+	240177	241217	ORF-T	YDL124W	YDL124W	941	429	4531	91	883.735	4824.61	1041	2.39511	10.9694	2.36035	10.5946	0.848929	4.63459	0.183172	1.03537	0.0773905	0.437447	0.176914
420	ST0420	chrIV	+	234865	236001	ORF-T	YDL127W	PCL2	876	225	512	450	822.69	545.177	1137	-1.4273	0.239955	-0.796707	0.450811	0.723562	0.479487	1.50903	0.532274	3.0154	1.06361	2.83507
419	ST0419	chrIV	+	232569	234033	ORF-T	YDL128W	VCX1	1430	398	2055	74	1342.98	2188.16	1465	1.48232	4.40315	1.60579	4.98177	0.916707	1.49363	0.613746	0.883854	0.208193	0.299818	0.694398
418	ST0418	chrIV	+	230897	232241	ORF-T	YDL129W	YDL129W	889	156	253	474	834.899	269.394	1345	-1.23593	0.290564	-1.26063	0.283476	0.620743	0.200293	3.09917	1.025	2.13634	0.70656	3.02358
417	ST0417	chrIV	+	229809	230625	ORF-T	YDL130W	RPP1B	7418	23	1918	54	6966.57	2042.28	817	2.69143	14.7527	1.90305	6.70631	8.52702	2.49974	3.41117	2.19982	0.577997	0.372744	1.55065
416	ST0416	chrIV	+	229113	229593	ORF-T	YDL130W-A	STF1	130	17	4248	207	122.089	4523.27	481	0.382169	1.46546	2.45523	11.6491	0.253823	9.40388	0.0269913	0.1258	0.173203	0.80726	0.214557
415	ST0415	chrIV	+	227313	228785	ORF-T	YDL131W	LYS21	969	72	513	980	910.031	546.242	1473	0.27468	1.31611	0.79484	2.21409	0.617808	0.370836	1.66598	0.594425	0.46942	0.167489	2.80268
414	ST0414	chrIV	+	224001	226785	ORF-T	YDL132W	CDC53	1421	219	1376	42	1334.52	1465.16	2785	0.672464	1.95906	0.789485	2.20226	0.479183	0.526091	0.910836	0.889566	0.244599	0.238887	1.02391
413	ST0413	chrIV	+	222281	223833	ORF-T	YDL133W	YDL133W	971	33	1401	36	911.909	1491.78	1553	0.206282	1.2291	0.703335	2.02048	0.587192	0.960582	0.611288	0.608321	0.477741	0.475423	1.00488
412	ST0412	chrIV	+	217529	218497	ORF-T	YDL136W	RPL35B	4398	64	1090	61	4130.36	1160.63	969	-0.129782	0.878287	-0.757397	0.468885	4.26249	1.19776	3.55872	1.87314	4.85319	2.55449	1.89987
411	ST0411	chrIV	+	216009	217217	ORF-T	YDL137W	ARF2	2070	1195	5065	40	1944.03	5393.21	1209	2.17789	8.82766	2.52025	12.4317	1.60796	4.46088	0.360459	0.71009	0.182151	0.35883	0.507624
410	ST0410	chrIV	+	213065	215753	ORF-T	YDL138W	RGT2	563	1415	936	2003	528.738	996.652	2689	-1.55756	0.210649	-1.56077	0.209974	0.19663	0.37064	0.530514	1.00321	0.93345	1.76517	0.528816
409	ST0409	chrIV	+	202809	205345	ORF-T	YDL141W	BPL1	858	332	749	323	805.786	797.535	2537	-0.420331	0.65683	-0.896408	0.408033	0.317614	0.314361	1.01035	1.60975	0.483556	0.770431	0.627643
408	ST0408	chrIV	+	199961	201697	ORF-T	YDL143W	CCT4	3342	71	1374	142	3138.62	1463.03	1737	1.46099	4.31021	1.05426	2.86986	1.80692	0.842276	2.14528	1.50189	0.419218	0.29349	1.42839
407	ST0407	chrIV	+	192569	194425	ORF-T	YDL146W	LDB17	564	120	817	73	529.677	869.941	1857	-0.158418	0.853493	-1.45853	0.232579	0.285233	0.468466	0.608866	3.66969	0.334195	2.01422	0.165917
405	ST0405	chrIV	+	190873	192401	ORF-T	YDL147W	RPN5	2933	24	2615	22	2754.51	2784.45	1529	2.14471	8.53953	2.15109	8.59419	1.80151	1.82109	0.989248	0.99364	0.210961	0.211898	0.995579
404	ST0404	chrIV	+	184897	187977	ORF-T	YDL149W	ATG9	290	173	858	61	272.352	913.598	3081	-1.83771	0.159182	-0.421667	0.655953	0.0883972	0.296526	0.298109	0.242673	0.555322	0.452055	1.22844
403	ST0403	chrIV	+	183233	184713	ORF-T	YDL150W	RPC53	1255	10	276	73	1178.63	293.885	1481	0.484584	1.6235	-0.158664	0.853283	0.795831	0.198437	4.01051	1.90265	0.490195	0.232556	2.10785
401	ST0401	chrIV	+	178201	180009	ORF-T	YDL154W	MSH5	136	29	125	57	127.724	133.1	1809	-3.77364	0.0229683	-3.85158	0.0212462	0.0706045	0.0735765	0.959607	1.08106	3.07399	3.46304	0.887658
402	ST0402	chrIV	+	180009	181097	ORF-T	YDL154W	MSH5	217	86	343	15	203.794	365.226	1089	-0.575063	0.562669	-0.626955	0.534216	0.187139	0.335378	0.557995	1.05326	0.332591	0.627794	0.529778
400	ST0400	chrIV	+	176633	178201	ORF-T	YDL155W	CLB3	1229	3	975	9	1154.21	1038.18	1569	0.259144	1.29582	0.140798	1.15119	0.735633	0.661682	1.11176	1.12563	0.567697	0.57478	0.987676
399	ST0399	chrIV	+	174825	176633	ORF-T	YDL156W	YDL156W	376	25	400	41	353.118	425.92	1809	-1.53659	0.215114	-1.61792	0.198311	0.195201	0.235445	0.829072	1.08473	0.907429	1.18725	0.764311
398	ST0398	chrIV	+	172433	174145	ORF-T	YDL159W	STE7	650	223	730	127	610.444	777.303	1713	-0.96871	0.379572	-0.185222	0.83092	0.356359	0.453767	0.785335	0.45681	0.938845	0.546103	1.71917
397	ST0397	chrIV	+	167697	169249	ORF-T	YDL161W	ENT1	1261	206	1137	119	1184.26	1210.68	1553	0.803866	2.23416	1.07411	2.92738	0.762563	0.779573	0.978181	0.763194	0.34132	0.266304	1.28169
396	ST0396	chrIV	+	164241	164937	ORF-T	YDL165W	CDC36	669	86	425	71	628.287	452.54	697	0.944792	2.57228	1.28593	3.61804	0.901417	0.649268	1.38836	0.710958	0.350435	0.179453	1.9528
394	ST0394	chrIV	+	159537	160913	ORF-T	YDL168W	SFA1	1446	130	1133	37	1358	1206.42	1377	0.772696	2.1656	1.0272	2.79324	0.986204	0.87612	1.12565	0.775299	0.455396	0.313657	1.45189
393	ST0393	chrIV	+	156313	157961	ORF-T	YDL170W	UGA3	663	5	357	157	622.653	380.133	1649	-1.17727	0.308118	-0.524473	0.591867	0.377594	0.230524	1.63798	0.520586	1.22549	0.389485	3.14643
392	ST0392	chrIV	+	148153	149097	ORF-T	YDL173W	YDL173W	1297	158	1097	127	1218.07	1168.08	945	1.61758	5.0409	1.60892	4.99742	1.28896	1.23607	1.04279	1.0087	0.255701	0.247341	1.0338
391	ST0391	chrIV	+	141953	144281	ORF-T	YDL176W	YDL176W	754	52	688	43	708.115	732.582	2329	-0.987429	0.372533	-0.438848	0.644779	0.304042	0.314548	0.966602	0.577769	0.816148	0.487838	1.67299
390	ST0390	chrIV	+	139489	141137	ORF-T	YDL178W	DLD2	1439	68	1218	104	1351.43	1296.93	1649	1.2229	3.39701	0.915476	2.49796	0.819544	0.786492	1.04202	1.35991	0.241255	0.314853	0.766245
389	ST0389	chrIV	+	138105	139329	ORF-T	YDL179W	PCL9	739	760	488	359	694.028	519.622	1225	-0.142835	0.866897	0.151194	1.16322	0.566553	0.424181	1.33564	0.745255	0.653542	0.364661	1.79219
388	ST0388	chrIV	+	135729	137633	ORF-T	YDL180W	YDL180W	622	112	916	48	584.148	975.356	1905	-0.15913	0.852886	0.173519	1.18948	0.306639	0.511998	0.598907	0.717022	0.359531	0.430437	0.835271
387	ST0387	chrIV	+	135009	135537	ORF-T	YDL181W	INH1	113	125	3644	457	106.123	3880.13	529	0.0991487	1.10423	2.38864	10.8986	0.200611	7.33484	0.0273505	0.101318	0.181675	0.673005	0.269946
386	ST0386	chrIV	+	133409	134761	ORF-T	YDL182W	LYS20	894	587	838	3687	839.595	892.302	1353	0.645534	1.90701	1.39466	4.03362	0.620543	0.659499	0.940932	0.472778	0.325402	0.163501	1.99022
385	ST0385	chrIV	+	126681	130169	ORF-T	YDL185W	TFP1	9227	2158	6894	1158	8665.48	7340.73	3489	1.94823	7.01627	1.61649	5.03538	2.48366	2.10396	1.18047	1.39339	0.353986	0.417836	0.847188
384	ST0384	chrIV	+	121969	123769	ORF-T	YDL189W	RBS1	1363	62	875	93	1280.05	931.699	1801	0.304876	1.35646	-0.0376327	0.963067	0.710746	0.517323	1.37389	1.40848	0.523973	0.537163	0.975445
383	ST0383	chrIV	+	117617	118705	ORF-T	YDL191W	RPL35A	5987	134	1756	104	5622.66	1869.79	1089	-1.25961	0.283764	-2.32258	0.0980202	5.16314	1.71698	3.00711	2.89496	18.1952	17.5166	1.03874
382	ST0382	chrIV	+	116265	117041	ORF-T	YDL192W	ARF1	4935	44	2577	26	4634.68	2743.99	777	2.57031	13.0698	1.7862	5.96673	5.96484	3.53152	1.68903	2.19045	0.456382	0.591868	0.771088
381	ST0381	chrIV	+	114569	116001	ORF-T	YDL193W	NUS1	584	571	553	304	548.46	588.834	1433	-0.0790319	0.92401	-0.421004	0.656388	0.382736	0.41091	0.931434	1.40772	0.414211	0.626017	0.661662
380	ST0380	chrIV	+	111369	114273	ORF-T	YDL194W	SNF3	378	15	1543	35	354.997	1642.99	2905	-2.4297	0.0880637	0.0487382	1.04995	0.122202	0.565571	0.216068	0.0838745	1.38765	0.538667	2.57609
379	ST0379	chrIV	+	107089	111169	ORF-T	YDL195W	SEC31	4843	22	3872	61	4548.28	4122.9	4081	0.932124	2.5399	0.51956	1.68129	1.1145	1.01027	1.10317	1.51069	0.438797	0.600889	0.730246
378	ST0378	chrIV	+	99497	100449	ORF-T	YDL201W	TRM8	892	41	259	94	837.717	275.783	953	0.178828	1.19581	0.043928	1.04491	0.879031	0.289384	3.03759	1.14442	0.73509	0.276947	2.65426
377	ST0377	chrIV	+	98425	99321	ORF-T	YDL202W	MRPL11	800	333	647	45	751.315	688.925	897	-0.0934584	0.910776	0.219524	1.24548	0.837587	0.768032	1.09056	0.731263	0.919641	0.616654	1.49134
375	ST0375	chrIV	+	94121	94609	ORF-T	YDL204W	RTN2	543	2	854	37	509.955	909.338	489	-1.90331	0.149074	-1.41196	0.243665	1.04285	1.85959	0.560798	0.6118	6.99552	7.63173	0.916636
376	ST0376	chrIV	+	94609	95785	ORF-T	YDL204W	RTN2	203	45	3880	29	190.646	4131.42	1177	-0.412886	0.661738	2.35672	10.5563	0.161976	3.51013	0.0461455	0.0626868	0.244774	0.332516	0.736127
374	ST0374	chrIV	+	90025	92457	ORF-T	YDL206W	YDL206W	287	68	732	76	269.534	779.433	2433	-0.99584	0.369413	-0.444378	0.641223	0.110783	0.320359	0.345808	0.576107	0.299889	0.499606	0.60025
373	ST0373	chrIV	+	88217	89905	ORF-T	YDL207W	GLE1	977	9	647	66	917.544	688.925	1689	-0.172827	0.841283	0.342535	1.40851	0.543247	0.407889	1.33185	0.597284	0.645736	0.289588	2.22984
372	ST0372	chrIV	+	87465	88097	ORF-T	YDL208W	NHP2	3322	40	737	4	3119.84	784.757	633	2.05097	7.77541	1.39704	4.04323	4.92865	1.23974	3.97555	1.92307	0.633877	0.306622	2.06729
371	ST0371	chrIV	+	84537	85937	ORF-T	YDL210W	UGA4	54	120	85	202	50.7138	90.5079	1401	-3.19397	0.0410088	-3.88411	0.0205662	0.0361983	0.0646024	0.560324	1.99399	0.882696	3.14119	0.281007
369	ST0369	chrIV	+	78361	79249	ORF-T	YDL212W	SHR3	1730	64	1011	49	1624.72	1076.51	889	2.20461	9.06676	1.76154	5.8214	1.82758	1.21092	1.50924	1.55749	0.201569	0.208012	0.969026
367	ST0367	chrIV	+	65201	65985	ORF-T	YDL219W	DTD1	394	198	173	128	370.023	184.21	785	1.35642	3.88229	0.191425	1.21097	0.471367	0.234663	2.0087	3.20592	0.121415	0.19378	0.626559
364	ST0364	chrIV	+	52393	54193	ORF-T	YDL225W	SHS1	806	58	535	75	756.95	569.668	1801	1.01147	2.74965	0.356798	1.42875	0.420294	0.316306	1.32876	1.92452	0.152854	0.221387	0.690436
363	ST0363	chrIV	+	44041	46009	ORF-T	YDL229W	SSB1	7162	9	731	9	6726.15	778.368	1969	2.45495	11.6459	2.10509	8.20781	3.41602	0.395311	8.64135	1.41888	0.293324	0.0481628	6.09026
362	ST0362	chrIV	+	42657	43713	ORF-T	YDL230W	PTP1	462	110	653	31	433.885	695.314	1057	-0.0671764	0.93503	-0.0199661	0.980232	0.410487	0.657818	0.624013	0.953887	0.439009	0.671084	0.654179
361	ST0361	chrIV	+	38465	38889	ORF-T	YDL232W	OST4	985	92	879	91	925.057	935.958	425	1.89966	6.68361	1.81568	6.14528	2.1766	2.20226	0.988353	1.0876	0.325663	0.358365	0.908746
360	ST0360	chrIV	+	36777	38377	ORF-T	YDL233W	YDL233W	649	33	769	41	609.505	818.831	1601	-0.710567	0.491366	-0.15482	0.856569	0.380702	0.511449	0.74436	0.573644	0.774785	0.597091	1.2976
359	ST0359	chrIV	+	32249	33409	ORF-T	YDL236W	PHO13	1598	173	684	110	1500.75	728.323	1161	1.13541	3.11244	0.431385	1.53939	1.29264	0.627324	2.06056	2.02187	0.415314	0.407515	1.01914
358	ST0358	chrIV	+	30625	32065	ORF-T	YDL237W	YDL237W	930	172	1229	73	873.404	1308.64	1441	0.48265	1.62036	0.767467	2.1543	0.60611	0.908146	0.667415	0.752152	0.374058	0.42155	0.88734
357	ST0357	chrIV	+	22641	26185	ORF-T	YDL240W	LRG1	1224	15	1104	38	1149.51	1175.54	3545	-0.865296	0.420927	-0.858887	0.423633	0.324263	0.331605	0.977861	0.993611	0.770355	0.782763	0.984148
356	ST0356	chrIV	+	20193	21761	ORF-T	YDL241W	YDL241W	635	122	159	115	596.357	169.303	1569	-0.468578	0.625892	-2.30843	0.0994174	0.380087	0.107905	3.52242	6.29559	0.607273	1.08537	0.559506
484	ST0484	chrIV	+	452977	453825	ORF-T	YDR002W	YRB1	3484	34	1666	33	3271.98	1773.96	849	2.6017	13.4867	2.18235	8.86708	3.85392	2.08946	1.84445	1.52099	0.285757	0.235643	1.21267
486	ST0486	chrIV	+	454065	455017	other	YDR003W, YDR003W-A	RCR2, YDR003W-A	844	210	1601	123	792.638	1704.74	953	0.251042	1.28536	1.09749	2.99663	0.831729	1.78882	0.46496	0.428936	0.647076	0.596942	1.08398
487	ST0487	chrIV	+	455225	456729	ORF-T	YDR004W	RAD57	903	79	739	122	848.047	786.887	1505	0.570071	1.76839	0.439454	1.55186	0.563487	0.522848	1.07772	1.13953	0.318643	0.336917	0.945761
489	ST0489	chrIV	+	461649	462817	ORF-T	YDR007W	TRP1	804	278	1510	1057	755.072	1607.85	1169	0.697521	2.00877	1.25317	3.50141	0.645913	1.3754	0.469617	0.573701	0.321547	0.392814	0.818574
490	ST0490	chrIV	+	463249	465601	ORF-T	YDR009W	GAL3	115	206	2998	143	108.002	3192.27	2353	-3.34726	0.0351805	1.40883	4.09117	0.0458995	1.35668	0.0338322	0.00859912	1.30469	0.331611	3.93439
491	ST0491	chrIV	+	465601	470593	ORF-T	YDR011W	SNQ2	3618	45	5014	94	3397.82	5338.9	4993	0.00781487	1.00785	0.370243	1.44809	0.680517	1.06928	0.636427	0.695984	0.67522	0.738407	0.914428
492	ST0492	chrIV	+	471809	473017	ORF-T	YDR012W	RPL4B	971	10	288	12	911.909	306.662	1209	2.55153	12.8267	1.64289	5.1701	0.754267	0.253649	2.97366	2.48094	0.0588043	0.0490608	1.1986
493	ST0493	chrIV	+	473153	473857	ORF-T	YDR013W	PSF1	625	114	450	129	586.965	479.16	705	-0.517462	0.596032	-0.735395	0.479316	0.832575	0.679659	1.22499	1.2435	1.39686	1.41798	0.98511
494	ST0494	chrIV	+	473993	476033	ORF-T	YDR014W	RAD61	455	19	422	36	427.311	449.345	2041	-1.11536	0.327796	-0.704612	0.494301	0.209363	0.220159	0.950963	0.663151	0.6387	0.445396	1.43401
495	ST0495	chrIV	+	477753	478306	ORF-T	YDR014W-A	HED1	13	119	48	249	12.2089	51.1104	554	-4.62652	0.00978879	-1.76254	0.171608	0.0220377	0.092257	0.238873	0.0570416	2.25132	0.537603	4.1877
499	ST0499	chrIV	+	486706	488058	ORF-T	YDR021W	FAL1	632	52	53	99	593.539	56.4344	1353	-0.735392	0.479317	-1.76335	0.171469	0.438684	0.0417105	10.5173	2.79536	0.915226	0.243254	3.76242
500	ST0500	chrIV	+	489466	491034	other	YDR023W, YDR024W	SES1, FYV1	4119	20	1603	19	3868.34	1706.87	1569	2.05598	7.81449	1.36171	3.90285	2.46548	1.08787	2.26633	2.00225	0.315501	0.278738	1.13189
501	ST0501	chrIV	+	491474	492490	other	YDR024W, YDR025W	FYV1, RPS11A	5882	61	1387	38	5524.05	1476.88	1017	-0.435878	0.646696	-1.24073	0.289174	5.43171	1.45219	3.74036	2.23636	8.39916	5.02186	1.67252
504	ST0504	chrIV	+	503474	503915	ORF-T	YDR031W	MIC14	241	25	748	352	226.334	796.47	442	0.738554	2.09291	1.56164	4.76662	0.512067	1.80197	0.284171	0.439075	0.244668	0.378039	0.647204
506	ST0506	chrIV	+	507811	509587	ORF-T	YDR033W	MRH1	9141	94	4384	65	8584.72	4668.08	1777	2.93632	18.8464	2.28795	9.85474	4.83102	2.62694	1.83903	1.91242	0.256336	0.266567	0.961621
507	ST0507	chrIV	+	521275	521563	ORF-T	YDR034W-B	YDR034W-B	24	3	666	11	22.5395	709.156	289	-0.465744	0.627668	2.50672	12.2646	0.0779912	2.45383	0.0317835	0.0511772	0.124255	0.200074	0.621048
508	ST0508	chrIV	+	521779	523131	ORF-T	YDR035W	ARO3	2040	51	1267	41	1915.85	1349.1	1353	1.15443	3.17221	1.15269	3.16671	1.416	0.997118	1.4201	1.00174	0.446378	0.314875	1.41763
509	ST0509	chrIV	+	525387	527267	ORF-T	YDR037W	KRS1	7464	40	938	99	7009.77	998.782	1881	2.14658	8.55557	1.04099	2.83202	3.72662	0.530984	7.01832	3.02101	0.435578	0.187493	2.32317
510	ST0510	chrIV	+	539771	540571	ORF-T	YDR041W	RSM10	970	7	1428	10	910.97	1520.53	801	1.4655	4.32971	1.93413	6.91805	1.13729	1.89829	0.599112	0.625857	0.262671	0.274397	0.957267
514	ST0514	chrIV	+	546411	547731	ORF-T	YDR044W	HEM13	981	53	295	82	921.3	314.116	1321	1.15625	3.178	-0.108138	0.897503	0.697427	0.237786	2.933	3.54093	0.219455	0.264942	0.828312
515	ST0515	chrIV	+	551427	552987	ORF-T	YDR047W	HEM12	2026	144	1318	58	1902.71	1403.41	1561	1.07465	2.92898	0.770232	2.16027	1.2189	0.899042	1.35578	1.35584	0.416153	0.416172	0.999954
516	ST0516	chrIV	+	553227	555211	ORF-T	YDR049W	YDR049W	888	27	641	55	833.96	682.536	1985	-0.445421	0.640554	-0.575748	0.562284	0.420131	0.343847	1.22185	1.1392	0.655887	0.611519	1.07255
519	ST0519	chrIV	+	563459	565019	ORF-T	YDR055W	PST1	833	180	1205	256	782.307	1283.08	1561	1.72661	5.62156	1.66582	5.29003	0.501158	0.821962	0.609709	1.06267	0.0891493	0.155379	0.573752
520	ST0520	chrIV	+	565883	567563	ORF-T	YDR057W	YOS9	492	23	507	67	462.059	539.853	1681	0.327985	1.38817	0.666378	1.94717	0.274871	0.32115	0.855897	0.712915	0.19801	0.164932	1.20056
521	ST0521	chrIV	+	570571	573795	ORF-T	YDR060W	MAK21	3294	23	510	57	3093.54	543.048	3225	1.17976	3.25358	0.121061	1.12869	0.959238	0.168387	5.69663	2.88261	0.294825	0.149187	1.97621
522	ST0522	chrIV	+	574155	575811	ORF-T	YDR061W	YDR061W	1077	358	1061	154	1011.46	1129.75	1657	0.342627	1.40864	0.41462	1.5138	0.610415	0.681806	0.895292	0.930537	0.433336	0.450395	0.962125
523	ST0523	chrIV	+	576075	578363	ORF-T	YDR062W	LCB2	2713	72	1447	58	2547.9	1540.76	2289	1.56623	4.78855	0.797789	2.22063	1.11311	0.673117	1.65366	2.1564	0.232451	0.30312	0.766861
524	ST0524	chrIV	+	578539	579227	ORF-T	YDR063W	YDR063W	498	244	915	183	467.694	974.291	689	0.424957	1.52952	1.0941	2.9865	0.678801	1.41407	0.480035	0.512146	0.443799	0.473486	0.9373
525	ST0525	chrIV	+	579419	580539	ORF-T	YDR064W	RPS13	20376	23	3539	18	19136	3768.32	1121	2.77275	16.0026	1.92052	6.82451	17.0705	3.36157	5.07812	2.34487	1.06673	0.492574	2.16563
526	ST0526	chrIV	+	580643	582331	ORF-T	YDR065W	YDR065W	926	197	457	244	869.648	486.613	1689	-0.540797	0.582284	-0.237338	0.788725	0.514889	0.288107	1.78714	0.73826	0.884258	0.365282	2.42075
527	ST0527	chrIV	+	583659	584771	ORF-T	YDR068W	DOS2	658	43	583	83	617.957	620.778	1113	0.837071	2.30959	1.13705	3.11756	0.555217	0.557752	0.995456	0.740833	0.240396	0.178907	1.3437
529	ST0529	chrIV	+	592195	593155	ORF-T	YDR073W	SNF11	1444	219	3189	472	1356.12	3395.64	961	0.210185	1.23391	1.25956	3.52386	1.41116	3.53345	0.399372	0.350157	1.14365	1.00272	1.14055
530	ST0530	chrIV	+	593659	596771	ORF-T	YDR074W	TPS2	955	394	5215	56	896.883	5552.93	3113	1.66122	5.26573	1.37997	3.97479	0.288109	1.78379	0.161515	1.32478	0.0547139	0.448776	0.121918
531	ST0531	chrIV	+	596971	598227	ORF-T	YDR075W	PPH3	1165	9	687	147	1094.1	731.517	1257	-0.694481	0.499333	-0.1703	0.843412	0.870408	0.581955	1.49566	0.59204	1.74314	0.690001	2.52629
532	ST0532	chrIV	+	598419	600675	ORF-T	YDR076W	RAD55	497	456	632	1859	466.755	672.953	2257	-1.78281	0.168164	-0.649176	0.522476	0.206803	0.298163	0.693592	0.32186	1.22977	0.570672	2.15495
533	ST0533	chrIV	+	600747	602131	ORF-T	YDR077W	SED1	4253	77	13594	217	3994.18	14474.9	1385	2.5017	12.2032	2.75374	15.7013	2.88388	10.4512	0.275939	0.777213	0.236321	0.665625	0.355036
534	ST0534	chrIV	+	603035	603603	ORF-T	YDR079W	PET100	542	309	796	390	509.016	847.58	569	0.13127	1.14028	1.14174	3.13221	0.89458	1.4896	0.600552	0.364049	0.78453	0.475574	1.64965
535	ST0535	chrIV	+	603971	607451	ORF-T	YDR080W	VPS41	696	78	795	86	653.644	846.515	3481	-0.412815	0.661785	0.216267	1.24143	0.187775	0.243182	0.772159	0.533081	0.28374	0.195888	1.44848
536	ST0536	chrIV	+	610339	611971	ORF-T	YDR082W	STN1	852	90	558	26	800.151	594.158	1633	-0.798938	0.449806	-0.00972197	0.990325	0.489988	0.363844	1.3467	0.454201	1.08933	0.367399	2.96498
537	ST0537	chrIV	+	612059	613332	ORF-T	YDR083W	RRP8	1114	125	294	150	1046.21	313.051	1274	0.517057	1.67708	-0.0549538	0.946529	0.821198	0.245723	3.34197	1.77183	0.489658	0.259604	1.88617
539	ST0539	chrIV	+	621988	624788	ORF-T	YDR089W	YDR089W	1294	54	759	101	1215.25	808.183	2801	-0.625255	0.535125	-1.95435	0.141657	0.433864	0.288534	1.50369	3.77762	0.810771	2.03685	0.398051
540	ST0540	chrIV	+	629804	630692	ORF-T	YDR092W	UBC13	1079	1062	702	157	1013.34	747.489	889	1.05677	2.87708	1.25444	3.50586	1.13986	0.84082	1.35565	0.820648	0.396187	0.239833	1.65193
541	ST0541	chrIV	+	631012	636116	ORF-T	YDR093W, YDR094W	DNF2, YDR094W	2261	19	1441	922	2123.41	1534.38	5105	-0.34004	0.711742	-1.31497	0.268484	0.415946	0.300563	1.38389	2.65097	0.584406	1.11949	0.522031
542	ST0542	chrIV	+	636580	639844	ORF-T	YDR096W	GIS1	521	33	2556	74	489.294	2721.63	3265	0.056176	1.05778	0.901312	2.46283	0.14986	0.833576	0.17978	0.429499	0.141674	0.338463	0.418581
543	ST0543	chrIV	+	652660	654596	ORF-T	YDR099W	BMH2	1993	120	3930	147	1871.71	4184.66	1937	2.31628	10.1379	2.60253	13.4978	0.966296	2.16038	0.44728	0.751079	0.0953152	0.160055	0.595516
544	ST0544	chrIV	+	654980	655580	ORF-T	YDR100W	TVP15	587	174	1593	69	551.278	1696.23	601	1.15633	3.17826	1.59866	4.94639	0.917267	2.82234	0.325003	0.642541	0.288607	0.570585	0.505809
545	ST0545	chrIV	+	657788	661148	ORF-T	YDR103W	STE5	1213	111	896	76	1139.18	954.06	3361	-0.909453	0.402744	-0.92812	0.395296	0.338941	0.283862	1.19404	1.01884	0.841579	0.7181	1.17195
546	ST0546	chrIV	+	671228	673436	ORF-T	YDR108W	GSG1	616	43	460	47	578.513	489.808	2209	-0.324008	0.723245	-0.833823	0.434385	0.261889	0.221733	1.1811	1.66498	0.362103	0.510452	0.709377
547	ST0547	chrIV	+	676044	677988	ORF-T	YDR110W	FOB1	1110	91	340	126	1042.45	362.032	1945	-0.368067	0.692071	-0.771434	0.46235	0.535964	0.186135	2.87944	1.49686	0.774436	0.402584	1.92366
549	ST0549	chrIV	+	682132	682700	ORF-T	YDR115W	YDR115W	742	225	834	290	696.845	888.043	569	1.2543	3.50538	1.57634	4.83721	1.22468	1.56071	0.784698	0.72467	0.349372	0.322646	1.08283
550	ST0550	chrIV	+	685852	687988	ORF-T	YDR118W, YDR118W-A	APC4, YDR118W-A	583	514	495	176	547.521	527.076	2137	-1.13151	0.322546	-0.768382	0.463763	0.25621	0.246643	1.03879	0.695497	0.794337	0.53183	1.49359
551	ST0551	chrIV	+	688140	690588	ORF-T	YDR119W	YDR119W	2834	58	1283	370	2661.53	1366.14	2449	1.16901	3.2188	0.21594	1.24103	1.08678	0.557835	1.94822	2.59366	0.337636	0.449494	0.751147
552	ST0552	chrIV	+	690980	691428	ORF-T	YDR119W-A	YDR119W-A	57	131	5570	58	53.5312	5930.93	449	0.190484	1.20983	2.98889	19.8637	0.119223	13.2092	0.00902577	0.0609068	0.0985451	0.664992	0.14819
553	ST0553	chrIV	+	693452	694220	ORF-T	YDR121W	DPB4	631	37	263	17	592.6	280.042	769	0.151494	1.16357	0.230147	1.25878	0.770611	0.364164	2.11611	0.924361	0.662281	0.289298	2.28927
554	ST0554	chrIV	+	694404	698036	ORF-T	YDR122W	KIN1	1112	67	2405	58	1044.33	2560.84	3633	-0.00739028	0.992637	0.351002	1.42049	0.287456	0.704884	0.407807	0.698799	0.289588	0.496225	0.583582
555	ST0555	chrIV	+	699740	701380	ORF-T	YDR124W	YDR124W	918	83	645	244	862.134	686.795	1641	-2.60271	0.0740729	-3.05113	0.0473053	0.525371	0.418523	1.2553	1.56585	7.09262	8.84727	0.801674
556	ST0556	chrIV	+	703220	704404	ORF-T	YDR126W	SWF1	455	1537	359	659	427.311	382.263	1185	-2.10006	0.12245	-1.57702	0.20659	0.3606	0.322585	1.11784	0.592719	2.94488	1.56147	1.88596
557	ST0557	chrIV	+	704404	709284	ORF-T	YDR127W	ARO1	6295	81	4208	63	5911.91	4480.67	4881	0.701662	2.0171	0.337741	1.40178	1.21121	0.917983	1.31942	1.43896	0.60047	0.654871	0.916929
558	ST0558	chrIV	+	709516	713236	ORF-T	YDR128W	YDR128W	998	111	1169	201	937.266	1244.75	3721	-0.689385	0.501884	-0.260285	0.770832	0.251886	0.33452	0.752975	0.651095	0.501879	0.433973	1.15648
563	ST0563	chrIV	+	728156	730372	ORF-T	YDR137W	RGP1	868	47	914	28	815.177	973.226	2217	0.586169	1.79709	0.643762	1.90363	0.367694	0.438984	0.837603	0.944034	0.204605	0.230604	0.887259
564	ST0564	chrIV	+	730556	733436	ORF-T	YDR138W	HPR1	991	125	788	149	930.692	839.062	2881	-0.310784	0.732872	-0.76834	0.463782	0.323045	0.29124	1.10921	1.58021	0.440793	0.627967	0.701937
565	ST0565	chrIV	+	734132	734860	ORF-T	YDR140W	MTQ2	534	79	236	82	501.503	251.293	729	-0.148441	0.862051	0.347033	1.41486	0.687933	0.344709	1.99569	0.609282	0.798019	0.243634	3.27549
566	ST0566	chrIV	+	746652	748436	ORF-T	YDR145W	TAF12	1416	31	1227	75	1329.83	1306.51	1785	1.42466	4.15645	1.47995	4.39272	0.745002	0.731938	1.01785	0.946212	0.17924	0.166625	1.07571
567	ST0567	chrIV	+	751204	753244	ORF-T	YDR147W	EKI1	759	42	436	82	712.81	464.252	2041	-0.673435	0.509954	-0.92164	0.397866	0.349246	0.227463	1.53539	1.28172	0.684857	0.571708	1.19791
568	ST0568	chrIV	+	755572	763868	ORF-T	YDR150W	NUM1	1872	55	3402	101	1758.08	3622.45	8297	-0.0523422	0.949004	0.911601	2.4883	0.211893	0.436597	0.485329	0.381386	0.22328	0.17546	1.27254
569	ST0569	chrIV	+	765644	766540	ORF-T	YDR152W	GIR2	1251	52	384	36	1174.87	408.883	897	1.18642	3.27534	0.993429	2.70048	1.30978	0.455834	2.87336	1.21287	0.39989	0.168797	2.36905
570	ST0570	chrIV	+	769484	769996	ORF-T	YDR156W, YDR157W	RPA14, YDR157W	2955	975	820	430	2775.17	873.135	513	0.925031	2.52195	0.634029	1.88519	5.40969	1.70202	3.1784	1.33777	2.14505	0.902836	2.3759
571	ST0571	chrIV	+	770340	771612	ORF-T	YDR158W	HOM2	6779	91	2585	55	6366.46	2752.51	1273	2.22277	9.23288	1.65137	5.21411	5.00115	2.16222	2.31297	1.77075	0.541667	0.414687	1.30621
572	ST0572	chrIV	+	771772	775804	ORF-T	YDR159W	SAC3	1060	14	838	40	995.493	892.302	4033	-0.356227	0.700313	-0.505849	0.602994	0.246837	0.22125	1.11565	1.16139	0.352466	0.366919	0.960609
573	ST0573	chrIV	+	775988	778708	ORF-T	YDR160W	SSY1	787	20	754	26	739.107	802.859	2721	-0.743677	0.475363	-0.301164	0.739956	0.27163	0.29506	0.920594	0.64242	0.571417	0.398753	1.43301
574	ST0574	chrIV	+	778996	780340	ORF-T	YDR161W	YDR161W	1346	81	288	86	1264.09	306.662	1345	0.964425	2.62328	0.335912	1.39922	0.939842	0.228002	4.12209	1.87482	0.35827	0.16295	2.19866
575	ST0575	chrIV	+	781356	782012	ORF-T	YDR163W	CWC15	283	60	355	89	265.778	378.004	657	-0.485777	0.615219	0.482383	1.61993	0.404532	0.575348	0.703109	0.379781	0.657542	0.355168	1.85135
576	ST0576	chrIV	+	784836	786332	ORF-T	YDR165W	TRM82	1438	86	180	181	1350.49	191.664	1497	1.03194	2.80651	-0.259802	0.771204	0.902131	0.128032	7.04614	3.63913	0.321442	0.166016	1.93622
577	ST0577	chrIV	+	789412	790180	ORF-T	YDR167W	TAF10	739	218	486	103	694.028	517.492	769	1.4129	4.10785	1.46502	4.32762	0.902507	0.672942	1.34114	0.949216	0.219703	0.155499	1.41289
578	ST0578	chrIV	+	790292	791884	ORF-T	YDR168W	CDC37	1204	28	1088	47	1130.73	1158.5	1593	1.28152	3.60213	1.18058	3.25625	0.709811	0.727245	0.976028	1.10622	0.197053	0.223338	0.88231
582	ST0582	chrIV	+	806556	807828	ORF-T	YDR171W	HSP42	495	73	2739	18	464.876	2916.48	1273	2.21289	9.14206	2.24912	9.47938	0.365182	2.29103	0.159396	0.964416	0.0399452	0.241686	0.165277
583	ST0583	chrIV	+	808260	810548	ORF-T	YDR172W	SUP35	3846	22	2084	48	3611.95	2219.04	2289	1.63849	5.14742	1.34375	3.8334	1.57796	0.969437	1.62771	1.34278	0.306554	0.252892	1.21219
584	ST0584	chrIV	+	812084	813028	ORF-T	YDR174W	HMO1	3487	78	2263	108	3274.8	2409.64	945	1.70285	5.48958	1.68872	5.41255	3.46539	2.54988	1.35904	1.01423	0.631267	0.471106	1.33997
585	ST0585	chrIV	+	814404	816596	ORF-T	YDR176W	NGG1	1299	55	1117	62	1219.95	1189.38	2193	0.470881	1.60141	0.693856	2.00142	0.556292	0.542353	1.0257	0.800135	0.347377	0.270984	1.28191
586	ST0586	chrIV	+	816764	817620	ORF-T	YDR177W	UBC1	1152	64	1795	844	1081.89	1911.31	857	1.7186	5.57672	1.97304	7.19248	1.26242	2.23024	0.566047	0.775354	0.226373	0.310079	0.73005
587	ST0587	chrIV	+	817836	818604	ORF-T	YDR178W	SDH4	436	98	4216	65	409.467	4489.19	769	1.10682	3.02471	2.31691	10.1442	0.532467	5.8377	0.0912117	0.29817	0.176039	0.575469	0.305905
588	ST0588	chrIV	+	819332	820909	ORF-T	YDR179W-A	YDR179W-A	383	80	235	109	359.692	250.228	1578	-0.104467	0.900804	-0.712145	0.490591	0.227942	0.158573	1.43746	1.83616	0.253043	0.323228	0.78286
589	ST0589	chrIV	+	821157	825789	ORF-T	YDR180W	SCC2	975	55	533	92	915.666	567.538	4633	-1.30355	0.271567	-1.86604	0.154736	0.19764	0.122499	1.6134	1.75503	0.727777	0.791665	0.919299
590	ST0590	chrIV	+	827525	829157	other	YDR182W, YDR182W-A	CDC1, YDR182W-A	1078	32	1096	44	1012.4	1167.02	1633	0.470544	1.60087	0.538099	1.71275	0.619962	0.714648	0.867507	0.934676	0.387267	0.417252	0.928136
591	ST0591	chrIV	+	829589	830293	ORF-T	YDR183W	PLP1	255	94	236	59	239.482	251.293	705	-0.793034	0.45247	-0.375777	0.686756	0.33969	0.356443	0.953	0.658851	0.750747	0.519025	1.44646
593	ST0593	chrIV	+	836365	838165	ORF-T	YDR188W	CCT6	5361	38	3052	28	5034.75	3249.77	1801	1.79934	6.04565	1.42961	4.17708	2.79553	1.80442	1.54927	1.44734	0.462403	0.431982	1.07042
594	ST0594	chrIV	+	838341	840493	ORF-T	YDR189W	SLY1	1269	144	802	98	1191.77	853.969	2153	1.00252	2.72515	0.786416	2.19551	0.553541	0.396641	1.39557	1.24124	0.203123	0.18066	1.12434
595	ST0595	chrIV	+	842301	843469	ORF-T	YDR191W	HST4	283	80	371	44	265.778	395.04	1169	-1.5296	0.216622	-1.53221	0.216057	0.227355	0.33793	0.672786	1.00261	1.04955	1.56408	0.671032
596	ST0596	chrIV	+	848349	850205	ORF-T	YDR195W	REF2	1457	138	1024	380	1368.33	1090.35	1857	-0.42425	0.65426	0.27733	1.3196	0.736851	0.587159	1.25494	0.495801	1.12624	0.444952	2.53114
597	ST0597	chrIV	+	851181	852493	ORF-T	YDR197W	CBS2	580	56	717	33	544.704	763.461	1313	0.103482	1.10903	0.4278	1.53388	0.414854	0.581463	0.713466	0.723021	0.374071	0.37908	0.986786
598	ST0598	chrIV	+	856285	856981	ORF-T	YDR201W	SPC19	333	32	394	113	312.735	419.531	697	0.966398	2.62846	0.792617	2.20917	0.448687	0.601909	0.74544	1.18979	0.170704	0.272459	0.626528
599	ST0599	chrIV	+	858093	859237	ORF-T	YDR204W	COQ4	655	178	2030	47	615.139	2161.54	1145	-0.167285	0.845959	1.37328	3.94827	0.53724	1.88781	0.284584	0.214261	0.635066	0.478136	1.32821
600	ST0600	chrIV	+	859317	861573	ORF-T	YDR205W	MSC2	692	248	727	62	649.888	774.109	2257	-0.915083	0.400483	-0.336275	0.714426	0.287943	0.342981	0.83953	0.560566	0.718989	0.480079	1.49765
601	ST0601	chrIV	+	861717	864861	ORF-T	YDR206W	EBS1	1296	47	692	64	1217.13	736.841	3145	0.619983	1.8589	0.336492	1.40003	0.387005	0.23429	1.65182	1.32776	0.208191	0.167347	1.24407
602	ST0602	chrIV	+	868045	870541	ORF-T	YDR208W	MSS4	1561	95	2037	33	1466	2169	2497	0.602709	1.82706	1.08239	2.95172	0.587106	0.868641	0.675891	0.618983	0.321339	0.294283	1.09194
603	ST0603	chrIV	+	871013	871589	ORF-T	YDR210W	YDR210W	1636	10	477	6	1536.44	507.909	577	1.70119	5.48045	0.651834	1.91906	2.66281	0.880259	3.02503	2.85581	0.485873	0.458693	1.05926
604	ST0604	chrIV	+	884661	886973	ORF-T	YDR211W	GCD6	2243	100	880	63	2106.5	937.023	2313	1.24366	3.46828	0.420893	1.52332	0.910722	0.405112	2.24808	2.27679	0.262586	0.26594	0.987389
605	ST0605	chrIV	+	887149	888989	ORF-T	YDR212W	TCP1	3193	16	1740	21	2998.69	1852.75	1841	1.76168	5.82222	1.27656	3.5843	1.62884	1.00638	1.61851	1.62437	0.279762	0.280775	0.996392
606	ST0606	chrIV	+	889525	892613	ORF-T	YDR213W	UPC2	1026	1561	439	1068	963.562	467.447	3089	-0.926074	0.396106	-1.66197	0.189766	0.311933	0.151326	2.06133	2.08734	0.7875	0.797438	0.987538
607	ST0607	chrIV	+	892749	893989	ORF-T	YDR214W	AHA1	2175	129	1772	450	2042.64	1886.82	1241	1.43033	4.18007	1.76723	5.85462	1.64596	1.52041	1.08258	0.713977	0.393764	0.259693	1.51627
608	ST0608	chrIV	+	894509	899453	ORF-T	YDR216W	ADR1	466	27	5069	79	437.641	5397.47	4945	-1.49071	0.225214	1.10892	3.03107	0.0885018	1.0915	0.0810827	0.0743017	0.392968	0.360104	1.09126
609	ST0609	chrIV	+	907317	909645	ORF-T	YDR221W	GTB1	1127	457	911	348	1058.42	970.032	2329	0.0875259	1.09147	0.538531	1.71349	0.454451	0.416502	1.09111	0.636988	0.416365	0.243072	1.71293
610	ST0610	chrIV	+	910029	911445	ORF-T	YDR222W	YDR222W	612	135	81	593	574.756	86.2487	1417	1.37455	3.95329	-3.65814	0.0257805	0.405615	0.0608671	6.66394	153.344	0.102602	2.36098	0.0434574
611	ST0611	chrIV	+	911637	913701	ORF-T	YDR223W	CRF1	191	475	1022	244	179.377	1088.22	2065	-3.04838	0.0474355	0.756398	2.13059	0.0868652	0.526985	0.164834	0.022264	1.83123	0.247343	7.40361
613	ST0613	chrIV	+	915429	916085	ORF-T	YDR225W	HTA1	8622	589	8220	269	8097.3	8752.65	657	3.20328	24.6132	3.00549	20.196	12.3247	13.3221	0.925126	1.21872	0.500733	0.659642	0.759099
614	ST0614	chrIV	+	916421	917285	ORF-T	YDR226W	ADK1	5830	40	2180	44	5475.21	2321.26	865	2.48123	11.9559	2.30093	9.98345	6.32972	2.68354	2.35872	1.19758	0.529421	0.268799	1.96958
615	ST0615	chrIV	+	917453	921845	ORF-T	YDR227W	SIR4	858	53	725	76	805.786	771.979	4393	-1.42992	0.239327	-0.566236	0.567658	0.183425	0.175729	1.04379	0.421605	0.766418	0.309569	2.47576
616	ST0616	chrIV	+	924685	926189	ORF-T	YDR229W	IVY1	693	77	1007	371	650.827	1072.25	1505	0.331363	1.39287	0.753883	2.12524	0.432443	0.71246	0.606972	0.655393	0.31047	0.335238	0.926118
617	ST0617	chrIV	+	927197	929261	ORF-T	YDR232W	HEM1	2884	120	3523	53	2708.49	3751.29	2065	0.998126	2.71319	1.91902	6.81428	1.31162	1.8166	0.722017	0.398162	0.483423	0.266588	1.81337
618	ST0618	chrIV	+	931005	933309	ORF-T	YDR234W	LYS4	2160	78	1075	168	2028.55	1144.66	2305	0.176342	1.19285	-0.356011	0.700465	0.880066	0.496598	1.77219	1.70293	0.737787	0.708955	1.04067
619	ST0619	chrIV	+	933485	935381	ORF-T	YDR235W	PRP42	1212	245	636	321	1138.24	677.212	1897	0.134117	1.14353	-0.754559	0.470218	0.600023	0.356991	1.68078	2.43191	0.524712	0.759204	0.691135
620	ST0620	chrIV	+	936461	937653	ORF-T	YDR237W	MRPL7	685	130	547	83	643.314	582.445	1193	1.1271	3.08668	0.702346	2.01848	0.53924	0.488219	1.10451	1.52921	0.174699	0.241874	0.722273
621	ST0621	chrIV	+	946717	948557	ORF-T	YDR242W	AMD2	388	257	442	237	364.388	470.641	1841	-1.42652	0.240144	-0.646689	0.523777	0.197929	0.255644	0.774237	0.458484	0.824213	0.488079	1.68869
622	ST0622	chrIV	+	950549	952533	ORF-T	YDR244W	PEX5	550	40	989	27	516.529	1053.09	1985	-0.43552	0.646928	0.571351	1.77066	0.260216	0.530522	0.490491	0.36536	0.402234	0.299619	1.34249
623	ST0623	chrIV	+	952717	954133	ORF-T	YDR245W	MNN10	1849	43	1050	203	1736.48	1118.04	1417	1.6224	5.06523	0.621775	1.86223	1.22546	0.789018	1.55315	2.71998	0.241936	0.423695	0.571014
624	ST0624	chrIV	+	954269	955101	ORF-T	YDR246W	TRS23	601	346	779	788	564.426	829.479	833	-0.265359	0.76693	0.728588	2.07215	0.677582	0.995773	0.680458	0.370113	0.883498	0.48055	1.83852
625	ST0625	chrIV	+	955661	957749	ORF-T	YDR247W	VHS1	521	43	1997	285	489.294	2126.4	2089	0.450621	1.56929	1.66273	5.27366	0.234224	1.01791	0.230104	0.297571	0.149255	0.193017	0.773276
627	ST0627	chrIV	+	960309	963245	ORF-T	YDR251W	PAM1	1421	122	1455	45	1334.52	1549.28	2937	1.04772	2.85115	0.466065	1.59371	0.454383	0.527505	0.861382	1.789	0.159369	0.330992	0.481488
629	ST0629	chrIV	+	963405	964757	ORF-T	YDR252W	BTT1	512	114	468	119	480.842	498.326	1353	-0.584291	0.557501	-0.777858	0.459389	0.355389	0.368312	0.964914	1.21357	0.637468	0.801743	0.795103
630	ST0630	chrIV	+	965037	967013	ORF-T	YDR254W	CHL4	455	137	686	534	427.311	730.452	1977	-0.589661	0.554515	-0.444872	0.640906	0.216141	0.369475	0.584995	0.865205	0.389784	0.576489	0.676134
634	ST0634	chrIV	+	993117	994133	ORF-T	YDR262W	YDR262W	1222	18	1861	46	1147.63	1981.59	1017	1.23315	3.43201	1.8041	6.0745	1.12845	1.94847	0.579148	0.564987	0.328801	0.320762	1.02506
635	ST0635	chrIV	+	998637	999973	ORF-T	YDR265W	PEX10	661	91	846	65	620.774	900.82	1337	0.0338114	1.03439	0.39772	1.48843	0.464304	0.673762	0.689121	0.694955	0.448868	0.452667	0.991606
636	ST0636	chrIV	+	1003957	1005173	ORF-T	YDR268W	MSW1	470	551	354	373	441.398	376.939	1217	-0.396498	0.672671	-0.872951	0.417717	0.362693	0.309728	1.17101	1.61035	0.539184	0.741478	0.727174
637	ST0637	chrIV	+	1005581	1008725	ORF-T	YDR270W	CCC2	457	92	1018	74	429.189	1083.97	3145	-1.69959	0.182758	-1.11369	0.328345	0.136467	0.344663	0.395943	0.556602	0.746711	1.0497	0.711358
638	ST0638	chrIV	+	1008949	1009901	ORF-T	YDR272W	GLO2	837	95	2140	15	786.064	2278.67	953	1.69173	5.42886	1.91498	6.78679	0.824831	2.39105	0.344966	0.799916	0.151934	0.352309	0.431253
639	ST0639	chrIV	+	1009901	1011301	ORF-T	YDR273W	DON1	86	318	174	284	80.7664	185.275	1401	-1.91075	0.147969	-1.17364	0.309238	0.0576491	0.132245	0.435927	0.478496	0.389602	0.427647	0.911037
640	ST0640	chrIV	+	1011589	1013197	ORF-T	YDR275W	BSC2	2339	475	1637	1093	2196.66	1743.08	1609	0.485478	1.62495	0.516327	1.67586	1.36523	1.08333	1.26022	0.969622	0.840168	0.646431	1.2997
642	ST0642	chrIV	+	1019237	1020413	ORF-T	YDR279W	RNH202	375	121	271	48	352.179	288.561	1177	0.230088	1.25871	-0.166166	0.846906	0.299218	0.245166	1.22047	1.48625	0.237717	0.289485	0.821175
643	ST0643	chrIV	+	1020613	1021693	ORF-T	YDR280W	RRP45	1346	115	524	16	1264.09	557.955	1081	0.804726	2.23608	-0.0200595	0.98014	1.16937	0.516147	2.26557	2.28139	0.522954	0.526605	0.993068
645	ST0645	chrIV	+	1033389	1035221	ORF-T	YDR285W	ZIP1	240	135	210	107	225.395	223.608	1833	-1.59615	0.202676	-1.41983	0.241755	0.122965	0.12199	1.00799	0.838352	0.606707	0.504602	1.20235
646	ST0646	chrIV	+	1035773	1036933	ORF-T	YDR287W	YDR287W	247	157	931	103	231.969	991.328	1161	-0.30103	0.740055	1.10459	3.01798	0.199801	0.853857	0.233998	0.245215	0.269981	0.282923	0.954255
647	ST0647	chrIV	+	1037141	1038221	ORF-T	YDR288W	NSE3	1837	49	1915	44	1725.21	2039.09	1081	0.978662	2.66089	0.705635	2.02513	1.59594	1.8863	0.846067	1.31394	0.599775	0.931446	0.643918
648	ST0648	chrIV	+	1039717	1043165	ORF-T	YDR291W	HRQ1	1042	133	727	107	978.588	774.109	3449	-0.613843	0.541267	-0.802066	0.448402	0.283731	0.224444	1.26415	1.2071	0.524198	0.500543	1.04726
649	ST0649	chrIV	+	1055149	1055965	ORF-T	YDR296W	MHR1	964	321	1254	302	905.335	1335.26	817	0.512018	1.66866	0.914939	2.49662	1.10812	1.63434	0.678022	0.668365	0.66408	0.654621	1.01445
650	ST0650	chrIV	+	1056397	1057741	ORF-T	YDR297W	SUR2	2070	22	1227	28	1944.03	1306.51	1345	1.54929	4.70813	1.19403	3.30036	1.44537	0.971382	1.48796	1.42655	0.306996	0.294326	1.04305
651	ST0651	chrIV	+	1059573	1061301	ORF-T	YDR299W	BFR2	1545	48	234	74	1450.98	249.163	1729	-0.0941871	0.910112	-0.646044	0.524115	0.839201	0.144108	5.82341	1.73648	0.922085	0.274955	3.35358
653	ST0653	chrIV	+	1063277	1067517	ORF-T	YDR301W	CFT1	1272	54	1104	95	1194.59	1175.54	4241	-1.08328	0.338482	-1.38707	0.249805	0.281677	0.277184	1.01621	1.35499	0.832176	1.1096	0.749976
654	ST0654	chrIV	+	1067669	1068477	ORF-T	YDR302W	GPI11	545	20	551	20	511.834	586.704	809	1.45508	4.28484	0.647945	1.91161	0.632674	0.725222	0.872388	2.24148	0.147654	0.379378	0.389201
656	ST0656	chrIV	+	1075813	1077965	ORF-T	YDR307W	YDR307W	652	137	818	151	612.322	871.006	2153	0.404135	1.49801	0.400171	1.49208	0.284404	0.404554	0.703006	1.00397	0.189855	0.271135	0.700225
658	ST0658	chrIV	+	1085061	1087085	ORF-T	YDR311W	TFB1	1288	32	953	227	1209.62	1014.75	2025	-0.379777	0.684014	0.277039	1.31922	0.597342	0.501113	1.19203	0.5185	0.873289	0.379856	2.299
659	ST0659	chrIV	+	1087541	1089061	ORF-T	YDR312W	SSF2	485	90	183	148	455.485	194.858	1521	-0.17409	0.840221	-0.227338	0.796652	0.299464	0.128112	2.33752	1.05469	0.356411	0.160813	2.21631
662	ST0662	chrIV	+	1093733	1095133	ORF-T	YDR316W	OMS1	494	11	681	430	463.937	725.128	1401	-0.782562	0.457233	-0.178583	0.836455	0.331147	0.517579	0.6398	0.546632	0.724242	0.618777	1.17044
663	ST0663	chrIV	+	1102133	1103461	ORF-T	YDR317W	HIM1	92	176	66	277	86.4013	70.2767	1329	-2.45045	0.0862552	-2.87183	0.056595	0.0650122	0.0528794	1.22944	1.52408	0.75372	0.934348	0.80668
664	ST0664	chrIV	+	1103653	1105077	ORF-T	YDR318W	MCM21	401	152	693	172	376.597	737.906	1425	0.110204	1.11651	0.0998332	1.10499	0.264278	0.517829	0.510359	1.01042	0.236701	0.468629	0.505094
666	ST0666	chrIV	+	1108661	1109957	ORF-T	YDR321W	ASP1	1979	11	363	9	1858.57	386.522	1297	1.22669	3.40994	-0.121353	0.885721	1.43297	0.298012	4.80844	3.8499	0.420234	0.336463	1.24898
667	ST0667	chrIV	+	1110573	1111829	ORF-T	YDR322W	MRPL35	659	106	730	630	618.896	777.303	1257	0.120392	1.12794	0.582814	1.79107	0.49236	0.61838	0.796209	0.629757	0.436512	0.345257	1.26431
668	ST0668	chrIV	+	1117109	1120245	ORF-T	YDR325W	YCG1	913	38	779	33	857.439	829.479	3137	-0.768666	0.463631	-1.10749	0.330386	0.273331	0.264418	1.03371	1.4033	0.589544	0.800329	0.736627
669	ST0669	chrIV	+	1127805	1129469	ORF-T	YDR330W	UBX5	603	29	1142	29	566.304	1216	1665	-0.240838	0.785969	0.823458	2.27837	0.340123	0.730331	0.46571	0.344971	0.432743	0.32055	1.35
670	ST0670	chrIV	+	1129469	1130853	ORF-T	YDR331W	GPI8	1653	18	1142	41	1552.41	1216	1385	0.14218	1.15278	-0.540451	0.582485	1.12087	0.877979	1.27665	1.97908	0.972316	1.5073	0.645072
671	ST0671	chrIV	+	1130965	1133117	ORF-T	YDR332W	IRC3	613	150	657	253	575.695	699.573	2153	-1.51543	0.219713	-0.381722	0.682685	0.267392	0.324929	0.822924	0.321837	1.217	0.475958	2.55696
672	ST0672	chrIV	+	1135725	1140509	ORF-T	YDR334W	SWR1	1690	94	1221	111	1587.15	1300.12	4785	-0.388975	0.677752	-0.559323	0.571596	0.331694	0.271707	1.22078	1.18572	0.489403	0.475349	1.02957
674	ST0674	chrIV	+	1140805	1144933	ORF-T	YDR335W	MSN5	2547	74	2440	68	2392	2598.11	4129	0.23788	1.26856	0.230203	1.25885	0.579317	0.629235	0.920669	1.00771	0.456674	0.499847	0.913628
675	ST0675	chrIV	+	1145077	1146093	ORF-T	YDR336W	YDR336W	486	327	377	232	456.424	401.429	1017	0.359944	1.43325	0.135087	1.14464	0.448795	0.394719	1.137	1.25214	0.313131	0.344842	0.908041
676	ST0676	chrIV	+	1146269	1147245	ORF-T	YDR337W	MRPS28	1068	19	892	31	1003.01	949.801	977	0.295645	1.34399	0.825457	2.28292	1.02662	0.972161	1.05602	0.588716	0.763857	0.42584	1.79376
684	ST0684	chrIV	+	1169069	1170205	ORF-T	YDR347W	MRP1	1246	102	1186	76	1170.17	1262.85	1137	-0.0496765	0.951537	0.576738	1.78022	1.02918	1.11069	0.926612	0.534505	1.08159	0.623904	1.73359
686	ST0686	chrIV	+	1178437	1181397	ORF-T	YDR351W	SBE2	1393	66	918	43	1308.23	977.486	2961	-0.294505	0.7449	-0.291155	0.7474	0.44182	0.33012	1.33836	0.996656	0.593126	0.441692	1.34285
687	ST0687	chrIV	+	1181621	1182949	ORF-T	YDR352W	YDR352W	1390	380	710	1463	1305.41	756.007	1329	0.345158	1.41221	-0.229401	0.79501	0.98225	0.568854	1.72672	1.77635	0.695539	0.715531	0.97206
688	ST0688	chrIV	+	1183229	1184485	ORF-T	YDR353W	TRR1	3581	147	2580	259	3363.08	2747.18	1257	2.24657	9.45524	1.01913	2.77078	2.67548	2.18551	1.22419	3.41249	0.282963	0.788771	0.358739
689	ST0689	chrIV	+	1184629	1185949	ORF-T	YDR354W	TRP4	753	16	1094	27	707.176	1164.89	1321	0.304902	1.35649	-0.115626	0.890808	0.535334	0.881825	0.607075	1.52277	0.394645	0.989915	0.398666
690	ST0690	chrIV	+	1186069	1189213	ORF-T	YDR356W	SPC110	1197	33	1292	193	1124.16	1375.72	3145	-1.22356	0.294182	-0.944278	0.38896	0.357442	0.437431	0.81714	0.756329	1.21504	1.12462	1.0804
692	ST0692	chrIV	+	1190005	1191853	ORF-T	YDR358W	GGA1	389	80	1478	64	365.327	1573.77	1849	-0.229263	0.79512	0.618456	1.85606	0.197581	0.851148	0.232135	0.428391	0.248492	0.458578	0.541875
694	ST0694	chrIV	+	1198981	1201485	ORF-T	YDR363W	ESC2	806	21	670	45	756.95	713.415	2505	-0.517805	0.595827	-0.226144	0.797603	0.302176	0.284797	1.06102	0.747022	0.507154	0.357066	1.42034
695	ST0695	chrIV	+	1202093	1202653	ORF-T	YDR363W-A	SEM1	873	130	981	130	819.873	1044.57	561	1.6363	5.13612	2.09417	8.11872	1.46145	1.86198	0.784892	0.632627	0.284543	0.229343	1.24069
696	ST0696	chrIV	+	1212773	1213629	ORF-T	YDR367W	YDR367W	483	20	382	27	453.607	406.753	857	0.0708126	1.07338	0.14515	1.15621	0.529296	0.474625	1.11519	0.928359	0.493111	0.410499	1.20125
697	ST0697	chrIV	+	1213837	1214997	ORF-T	YDR368W	YPR1	791	111	1108	71	742.863	1179.8	1161	1.4031	4.06778	1.75837	5.80299	0.639848	1.01619	0.629653	0.70098	0.157296	0.175115	0.898246
698	ST0698	chrIV	+	1219341	1221045	ORF-T	YDR371W	CTS2	377	133	660	104	354.057	702.767	1705	-0.252728	0.776679	-0.543722	0.580583	0.207658	0.41218	0.503804	1.33776	0.267367	0.709942	0.376604
699	ST0699	chrIV	+	1222677	1223373	ORF-T	YDR373W	FRQ1	967	4	860	10	908.152	915.727	697	1.65152	5.21489	1.63553	5.1322	1.30294	1.31381	0.991728	1.01611	0.249851	0.255994	0.976003
700	ST0700	chrIV	+	1224733	1225189	ORF-T	YDR374W-A	YDR374W-A	223	60	332	79	209.429	353.513	457	1.06636	2.90478	1.33243	3.79026	0.45827	0.773552	0.592422	0.76638	0.157764	0.20409	0.773013
701	ST0701	chrIV	+	1226741	1228293	ORF-T	YDR376W	ARH1	513	52	750	1142	481.781	798.599	1553	0.457674	1.58039	-0.111796	0.894227	0.310226	0.51423	0.603282	1.76733	0.196297	0.575056	0.341352
702	ST0702	chrIV	+	1228525	1229317	ORF-T	YDR377W	ATP17	1376	585	5931	433	1292.26	6315.32	793	2.34394	10.4222	3.04367	20.9821	1.62959	7.96384	0.204623	0.496718	0.156358	0.379554	0.411951
703	ST0703	chrIV	+	1230053	1233245	ORF-T	YDR379W	RGA2	725	70	928	303	680.88	988.134	3193	-0.287327	0.750266	-0.282793	0.753676	0.213241	0.309469	0.689056	0.995476	0.284221	0.410613	0.692188
704	ST0704	chrIV	+	1234117	1236245	ORF-T	YDR380W	ARO10	346	734	3017	308	324.944	3212.5	2129	-0.242272	0.784843	1.9045	6.71607	0.152627	1.50892	0.10115	0.11686	0.194469	0.224674	0.865562
705	ST0705	chrIV	+	1236445	1238205	ORF-T	YDR381W	YRA1	6494	54	5978	96	6098.8	6365.37	1761	2.18415	8.8831	1.81744	6.1561	3.46326	3.61463	0.958122	1.44298	0.389871	0.587163	0.66399
707	ST0707	chrIV	+	1239397	1239973	ORF-T	YDR382W	RPP2B	9669	117	1976	77	9080.59	2104.04	577	2.51602	12.3792	2.0962	8.13518	15.7376	3.64652	4.31578	1.52169	1.27129	0.448241	2.83617
710	ST0710	chrIV	+	1243149	1245917	ORF-T	YDR385W	EFT2	3044	2	1591	12	2858.76	1694.1	2769	2.67963	14.5797	1.84501	6.32817	1.03241	0.611808	1.68748	2.30394	0.0708117	0.09668	0.732434
711	ST0711	chrIV	+	1246069	1248085	ORF-T	YDR386W	MUS81	391	40	554	64	367.205	589.899	2017	-1.27491	0.279457	-1.04713	0.350942	0.182055	0.292463	0.622489	0.796304	0.651461	0.833366	0.781723
712	ST0712	chrIV	+	1250133	1251749	ORF-T	YDR388W	RVS167	2006	243	3093	77	1883.92	3293.42	1617	1.2772	3.58657	1.56459	4.7807	1.16507	2.03675	0.572026	0.750218	0.324844	0.426036	0.76248
713	ST0713	chrIV	+	1252005	1254693	ORF-T	YDR389W	SAC7	1355	12	1485	50	1272.54	1581.23	2689	-0.129052	0.878928	0.280068	1.32322	0.473239	0.588035	0.80478	0.664235	0.538428	0.444397	1.21159
714	ST0714	chrIV	+	1258629	1259717	ORF-T	YDR392W	SPT3	584	50	658	20	548.46	700.638	1089	0.0658866	1.06811	0.194004	1.2141	0.503637	0.643377	0.782801	0.87975	0.471523	0.52992	0.8898
715	ST0715	chrIV	+	1259845	1261413	ORF-T	YDR393W	SHE9	675	724	747	514	633.922	795.405	1569	-0.413591	0.661271	-0.0640202	0.937986	0.40403	0.50695	0.796981	0.704991	0.610989	0.540467	1.13048
716	ST0716	chrIV	+	1261557	1263045	ORF-T	YDR394W	RPT3	2180	98	1813	27	2047.33	1930.48	1489	1.48991	4.43669	1.52288	4.58542	1.37497	1.29649	1.06053	0.967563	0.30991	0.282743	1.09608
717	ST0717	chrIV	+	1263197	1266269	ORF-T	YDR395W	SXM1	3218	117	982	123	3022.17	1045.63	3073	0.968803	2.63479	0.044002	1.04498	0.983458	0.340264	2.89027	2.52137	0.373259	0.325617	1.14631
719	ST0719	chrIV	+	1267341	1269517	ORF-T	YDR398W	UTP5	2950	337	474	400	2770.48	504.715	2177	0.559408	1.74964	0.0925303	1.09695	1.27261	0.23184	5.48919	1.59501	0.727357	0.21135	3.44148
720	ST0720	chrIV	+	1269997	1270797	ORF-T	YDR399W	HPT1	5536	25	811	85	5199.1	863.552	801	2.5079	12.2791	1.93651	6.9345	6.49076	1.07809	6.0206	1.77073	0.528603	0.155468	3.40008
722	ST0722	chrIV	+	1270997	1272205	ORF-T	YDR400W	URH1	751	38	421	89	705.297	448.28	1209	-0.240386	0.786324	-1.07471	0.341396	0.583372	0.370786	1.57334	2.30326	0.741898	1.08609	0.683093
723	ST0723	chrIV	+	1275381	1276309	ORF-T	YDR403W	DIT1	58	66	139	142	54.4704	148.007	929	-2.27329	0.102973	-1.05375	0.348626	0.0586333	0.159319	0.368025	0.295368	0.569405	0.45699	1.24599
724	ST0724	chrIV	+	1277573	1278517	ORF-T	YDR405W	MRP20	732	48	1622	593	687.454	1727.1	945	0.00442147	1.00443	1.23285	3.43101	0.727464	1.82762	0.398038	0.292751	0.724255	0.532678	1.35965
725	ST0725	chrIV	+	1279101	1283797	ORF-T	YDR406W, YDR406W-A	PDR15, YDR406W-A	533	224	2637	389	500.564	2807.88	4697	-0.913911	0.400953	0.441752	1.55543	0.106571	0.597802	0.178271	0.257776	0.265794	0.384332	0.691574
726	ST0726	chrIV	+	1289373	1292357	ORF-T	YDR409W	SIZ1	1276	206	1146	137	1198.35	1220.26	2985	-0.977582	0.37622	-0.274863	0.759676	0.401457	0.408797	0.982043	0.495237	1.06708	0.53812	1.98298
727	ST0727	chrIV	+	1294621	1295549	ORF-T	YDR412W	RRP17	881	82	263	121	827.386	280.042	929	1.09171	2.97936	0.685388	1.98454	0.89062	0.301445	2.95451	1.50128	0.29893	0.151896	1.96799
729	ST0729	chrIV	+	1298349	1300965	ORF-T	YDR416W	SYF1	1016	1828	627	308	954.171	667.629	2617	-0.769405	0.463288	-0.860859	0.422799	0.364605	0.255112	1.42919	1.09577	0.786993	0.60339	1.30429
730	ST0730	chrIV	+	1301557	1302221	ORF-T	YDR418W	RPL12B	7495	40	1576	15	7038.89	1678.12	665	2.70799	14.9991	2.14415	8.53474	10.5848	2.52349	4.1945	1.75742	0.705693	0.295673	2.38673
732	ST0732	chrIV	+	1303157	1305381	ORF-T	YDR419W	RAD30	522	40	420	37	490.233	447.216	2225	-0.798404	0.450047	-0.580463	0.559639	0.22033	0.200996	1.09619	0.804172	0.489571	0.359152	1.36313
733	ST0733	chrIV	+	1305885	1311749	ORF-T	YDR420W	HKR1	2000	128	1318	247	1878.29	1403.41	5865	-0.882507	0.413744	-0.448693	0.638462	0.320254	0.239285	1.33838	0.648033	0.774038	0.374783	2.0653
734	ST0734	chrIV	+	1311957	1315077	ORF-T	YDR421W	ARO80	2495	127	3730	115	2343.16	3971.7	3121	-0.957773	0.383746	-0.320714	0.725631	0.750774	1.27257	0.589965	0.528845	1.95643	1.75375	1.11557
736	ST0736	chrIV	+	1319973	1321949	ORF-T	YDR425W	SNX41	472	524	738	150	443.276	785.822	1977	-0.351253	0.703805	0.413908	1.51272	0.224217	0.397482	0.564092	0.465259	0.318577	0.26276	1.21243
737	ST0737	chrIV	+	1322165	1323445	ORF-T	YDR427W	RPN9	1783	100	1223	95	1674.49	1302.25	1281	2.20962	9.11224	2.09212	8.10206	1.30718	1.01659	1.28585	1.12468	0.143453	0.125473	1.1433
739	ST0739	chrIV	+	1328757	1330677	ORF-T	YDR432W, YDR433W	NPL3, YDR433W	4269	17	2630	20	4009.21	2800.42	1921	1.90321	6.70737	1.2357	3.44078	2.08704	1.45779	1.43164	1.94938	0.311157	0.423682	0.734411
740	ST0740	chrIV	+	1331125	1332933	ORF-T	YDR434W	GPI17	933	24	733	126	876.222	780.498	1809	1.05301	2.86628	0.570371	1.76892	0.484368	0.431453	1.12264	1.62035	0.168988	0.243907	0.69284
742	ST0742	chrIV	+	1334573	1336981	ORF-T	YDR436W	PPZ2	475	204	1205	60	446.094	1283.08	2409	-0.887774	0.411571	0.676702	1.96738	0.185178	0.532621	0.347673	0.209198	0.44993	0.270726	1.66194
743	ST0743	chrIV	+	1337269	1340813	ORF-T	YDR437W, YDR438W, YDR439W	GPI19, THI74, LRS4	1929	266	1685	274	1811.61	1794.19	3545	-1.23275	0.29149	-0.754714	0.470145	0.511032	0.506118	1.00971	0.619999	1.75317	1.07651	1.62857
744	ST0744	chrIV	+	1342397	1344309	ORF-T	YDR440W	DOT1	555	130	386	105	521.225	411.012	1913	-1.10137	0.332417	-1.53967	0.214452	0.272465	0.214852	1.26815	1.55007	0.819649	1.00187	0.818121
745	ST0745	chrIV	+	1350205	1352341	ORF-T	YDR444W	YDR444W	1030	14	997	22	967.319	1061.6	2137	-0.838131	0.432518	-0.83025	0.43594	0.452653	0.496773	0.911185	0.99215	1.04655	1.13954	0.918395
746	ST0746	chrIV	+	1355965	1357429	ORF-T	YDR448W	ADA2	883	75	809	21	829.264	861.423	1465	-1.34462	0.26064	-1.31652	0.268066	0.566051	0.588002	0.962669	0.972298	2.17177	2.1935	0.990096
748	ST0748	chrIV	+	1359885	1360901	ORF-T	YDR450W	RPS18A	5317	65	1498	107	4993.43	1595.07	1017	-1.13421	0.321677	-1.9743	0.138858	4.90996	1.56841	3.13054	2.31659	15.2636	11.295	1.35136
750	ST0750	chrIV	+	1362733	1365045	ORF-T	YDR452W	PPN1	1215	146	2338	106	1141.06	2489.5	2313	1.08073	2.94683	1.58159	4.86266	0.493325	1.07631	0.458349	0.606011	0.167409	0.221341	0.756338
752	ST0752	chrIV	+	1367429	1369461	ORF-T	YDR456W	NHX1	1156	69	1413	65	1085.65	1504.56	2033	0.0232804	1.02355	0.450296	1.56878	0.534014	0.740069	0.721573	0.652453	0.521726	0.471749	1.10594
753	ST0753	chrIV	+	1369653	1379693	ORF-T	YDR457W	TOM1	4368	48	3311	104	4102.18	3525.55	10041	-0.141241	0.86828	-0.180824	0.834582	0.408543	0.351115	1.16356	1.04038	0.47052	0.420708	1.1184
754	ST0754	chrIV	+	1383669	1384893	ORF-T	YDR460W	TFB3	634	304	700	179	595.417	745.359	1225	-0.402913	0.66837	0.251939	1.28652	0.486055	0.608457	0.798833	0.519519	0.727224	0.472948	1.53764
755	ST0755	chrIV	+	1385109	1385237	ORF-T	YDR461W	MFA1	246	9	98	58	231.029	104.35	129	2.06322	7.87126	1.62188	5.06259	1.79093	0.808917	2.21398	1.55479	0.227527	0.159783	1.42397
756	ST0756	chrIV	+	1386021	1386613	ORF-T	YDR462W	MRPL28	849	72	1139	49	797.333	1212.81	593	0.189614	1.20878	1.6077	4.99131	1.34458	2.0452	0.657429	0.242178	1.11234	0.409753	2.71465
757	ST0757	chrIV	+	1386765	1388533	ORF-T	YDR463W	STP1	1114	14	1314	23	1046.21	1399.15	1769	0.153879	1.16635	0.837427	2.31041	0.591411	0.790925	0.747747	0.504823	0.507062	0.34233	1.4812
758	ST0758	chrIV	+	1388741	1393309	ORF-T	YDR464W	SPP41	1182	130	876	49	1110.07	932.764	4569	-0.874826	0.416934	-0.379347	0.684308	0.242957	0.204151	1.19008	0.609279	0.582721	0.298331	1.95327
759	ST0759	chrIV	+	1395013	1398061	ORF-T	YDR466W	PKH3	1059	503	1408	476	994.554	1499.24	3049	-0.0420538	0.958818	0.546454	1.72712	0.32619	0.491714	0.663373	0.555155	0.3402	0.284702	1.19493
760	ST0760	chrIV	+	1398997	1399797	ORF-T	YDR469W	SDC1	587	74	332	133	551.278	353.513	801	0.608681	1.83801	0.595646	1.8142	0.688237	0.44134	1.55943	1.01312	0.374448	0.243269	1.53923
761	ST0761	chrIV	+	1401693	1402677	ORF-T	YDR471W	RPL27B	6315	213	1690	45	5930.7	1799.51	985	2.86705	17.585	1.97147	7.18125	6.02101	1.82691	3.29573	2.44874	0.342394	0.2544	1.34589
763	ST0763	chrIV	+	1403205	1404277	ORF-T	YDR472W	TRS31	2748	52	1038	43	2580.77	1105.26	1073	0.638637	1.8939	-0.328898	0.719717	2.40519	1.03007	2.33498	2.63145	1.26997	1.43121	0.887338
766	ST0766	chrIV	+	1412077	1414381	ORF-T	YDR477W	SNF1	1667	58	2347	41	1565.55	2499.08	2305	0.530892	1.70045	0.702322	2.01843	0.679199	1.0842	0.626451	0.84246	0.399423	0.53715	0.743597
767	ST0767	chrIV	+	1414541	1416357	ORF-T	YDR478W	SNM1	664	337	206	679	623.592	219.349	1817	-1.52797	0.216977	-1.56593	0.208894	0.343199	0.12072	2.84293	1.03869	1.58173	0.577901	2.73703
768	ST0768	chrIV	+	1417333	1418437	ORF-T	YDR480W	DIG2	292	263	312	191	274.23	332.217	1105	-0.719344	0.487072	-0.265505	0.766819	0.248172	0.300649	0.825454	0.635185	0.509518	0.392073	1.29955
769	ST0769	chrIV	+	1421117	1422589	ORF-T	YDR483W	KRE2	3156	58	1740	42	2963.94	1852.75	1473	2.07954	8.0008	1.6984	5.4652	2.01218	1.25781	1.59975	1.46396	0.251497	0.230149	1.09276
770	ST0770	chrIV	+	1422733	1424709	ORF-T	YDR484W	VPS52	572	55	469	48	537.191	499.391	1977	-0.111562	0.894436	0.0793613	1.0826	0.27172	0.2526	1.07569	0.826196	0.303789	0.233328	1.30198
772	ST0772	chrIV	+	1430997	1432261	ORF-T	YDR489W	SLD5	836	193	560	197	785.125	596.288	1265	-1.79356	0.166366	-1.54855	0.212556	0.620652	0.471374	1.31669	0.782695	3.73064	2.21765	1.68225
773	ST0773	chrIV	+	1434709	1435941	ORF-T	YDR492W	IZH1	1337	27	259	219	1255.64	275.783	1233	0.749206	2.11532	0.912952	2.49167	1.01836	0.223668	4.55299	0.848958	0.48142	0.0897666	5.36303
774	ST0774	chrIV	+	1436109	1436693	ORF-T	YDR493W	FMP36	337	482	340	274	316.492	362.032	585	-0.134339	0.874293	0.509597	1.66462	0.541011	0.618858	0.87421	0.525221	0.618798	0.371771	1.66446
775	ST0775	chrIV	+	1436837	1438101	ORF-T	YDR494W	RSM28	771	30	1141	42	724.08	1214.94	1265	1.30631	3.69253	1.80132	6.05764	0.572395	0.960424	0.595982	0.609566	0.155014	0.158547	0.977715
777	ST0777	chrIV	+	1447805	1450101	ORF-T	YDR499W	LCD1	478	584	580	260	448.911	617.584	2297	-1.07673	0.340706	-0.398144	0.671565	0.195434	0.268865	0.726883	0.507332	0.573613	0.400356	1.43276
778	ST0778	chrIV	+	1451229	1453069	ORF-T	YDR501W	PLM2	150	150	181	104	140.872	192.729	1841	-2.656	0.0702284	-3.0528	0.0472266	0.0765191	0.104687	0.730933	1.48705	1.08958	2.21669	0.491531
783	ST0783	chrIV	+	1469317	1469781	ORF-T	YDR510W	SMT3	1453	59	1542	111	1364.58	1641.92	465	1.88508	6.58687	2.05424	7.80091	2.93457	3.53101	0.831086	0.844371	0.445519	0.452641	0.984266
784	ST0784	chrIV	+	1469989	1470445	ORF-T	YDR511W	ACN9	370	99	840	449	347.483	894.431	457	-0.443392	0.641855	0.610922	1.84213	0.760357	1.95718	0.388496	0.348431	1.18462	1.06246	1.11499
785	ST0785	chrIV	+	1470957	1471533	ORF-T	YDR513W	GRX2	523	89	2804	35	491.172	2985.7	577	1.83447	6.2618	2.36212	10.6134	0.851252	5.17452	0.164508	0.58999	0.135944	0.487545	0.278833
786	ST0786	chrIV	+	1473205	1474733	ORF-T	YDR515W	SLF1	461	23	323	49	432.945	343.93	1529	-0.844746	0.429666	-0.125586	0.88198	0.283156	0.224938	1.25882	0.487161	0.659014	0.255037	2.58399
787	ST0787	chrIV	+	1477117	1478437	ORF-T	YDR517W	GRH1	1249	214	1508	188	1172.99	1605.72	1321	1.07313	2.92453	1.29168	3.63888	0.887957	1.21553	0.730509	0.803689	0.303624	0.33404	0.908945
788	ST0788	chrIV	+	1478573	1480205	ORF-T	YDR518W	EUG1	475	21	415	39	446.094	441.892	1633	0.662951	1.94051	0.11995	1.12744	0.273174	0.270601	1.00951	1.72116	0.140774	0.240014	0.586527
789	ST0789	chrIV	+	1480365	1480997	ORF-T	YDR519W	FPR2	708	69	437	61	664.914	465.317	633	1.77272	5.88682	1.766	5.84742	1.05042	0.735098	1.42895	1.00674	0.178435	0.125713	1.41938
793	ST0793	chrIV	+	1490517	1492517	ORF-T	YDR525W-A, YDR527W	SNA2, RBA50	2648	2018	3780	1929	2486.85	4024.94	2001	0.246609	1.27968	-0.188887	0.82788	1.24281	2.01146	0.617861	1.54573	0.971186	2.42966	0.399721
794	ST0794	chrIV	+	1494277	1495949	ORF-T	YDR528W	HLR1	768	65	599	783	721.263	637.815	1673	-0.946379	0.388144	-1.30019	0.272481	0.431119	0.38124	1.13083	1.42448	1.11072	1.39914	0.793858
796	ST0796	chrIV	+	1498165	1499405	ORF-T	YDR531W	YDR531W	1010	61	1230	128	948.536	1309.7	1241	0.885241	2.42357	0.635489	1.88795	0.764332	1.05536	0.724237	1.28371	0.315375	0.559	0.564177
798	ST0798	chrIV	+	1507941	1509757	ORF-T	YDR536W	STL1	16	310	138	507	15.0263	146.942	1817	-4.93993	0.0071551	-3.47262	0.0310357	0.00826984	0.0808708	0.10226	0.230544	1.1558	2.60573	0.44356
799	ST0799	chrIV	+	1510005	1511773	ORF-T	YDR538W	PAD1	489	322	664	126	459.242	707.027	1769	-1.27151	0.280409	0.165713	1.18023	0.259605	0.399676	0.649539	0.237587	0.92581	0.338641	2.7339
800	ST0800	chrIV	+	1511981	1513933	ORF-T	YDR539W	YDR539W	643	19	747	38	603.87	795.405	1953	-0.175841	0.838752	0.164692	1.17903	0.309201	0.407273	0.759198	0.711392	0.368644	0.345431	1.0672
802	ST0802	chrIV	+	1518269	1518749	other	YDRWdelta31	YDRWdelta31	75	5	28	6	70.4358	29.8144	481	-1.7853	0.167747	-3.00676	0.0494515	0.146436	0.0619842	2.36248	3.39214	0.87296	1.25343	0.696456
4012	ST4012	chrIV	-	21869	22453	CUTs	CUT468	CUT468	743	46	762	51	697.784	811.377	585	-4.43471	0.0118585	-4.40733	0.0121877	1.19279	1.38697	0.86	0.97299	100.586	113.801	0.883873
4015	ST4015	chrIV	-	31717	32045	CUTs	CUT469	CUT469	146	195	53	230	137.115	56.4344	329	-4.85673	0.00777585	-3.97173	0.0188409	0.416763	0.171533	2.42964	0.412712	53.5971	9.10429	5.88701
4024	ST4024	chrIV	-	65045	65949	CUTs	CUT470	CUT470	195	389	130	173	183.133	138.424	905	-4.03922	0.0176112	-4.72153	0.00890151	0.202357	0.152955	1.32299	1.97845	11.4902	17.183	0.668698
4032	ST4032	chrIV	-	89525	89845	CUTs	CUT471	CUT471	3	99	36	79	2.81743	38.3328	321	-4.48654	0.0112596	-3.74177	0.0237121	0.00877705	0.119417	0.0734993	0.474844	0.779519	5.0361	0.154786
4035	ST4035	chrIV	-	98861	99317	CUTs	CUT472	CUT472	322	271	42	228	302.404	44.7216	457	-4.88788	0.00753737	-4.94865	0.00709297	0.661717	0.097859	6.76194	1.06265	87.7914	13.7966	6.36326
4040	ST4040	chrIV	-	115165	116101	CUTs	CUT473	CUT473	576	286	305	267	540.947	324.764	937	-4.40057	0.0122704	-4.69554	0.00913598	0.577318	0.3466	1.66566	1.34308	47.0497	37.9379	1.24018
4046	ST4046	chrIV	-	132317	132645	CUTs	CUT474	CUT474	188	48	133	213	176.559	141.618	329	-4.47791	0.0113571	-3.66612	0.0255756	0.536654	0.430451	1.24673	0.444062	47.2526	16.8305	2.80755
4047	ST4047	chrIV	-	134341	134733	CUTs	CUT475	CUT475	574	201	3630	167	539.069	3865.22	393	-4.13835	0.0159491	-4.005	0.0182243	1.37168	9.83517	0.139466	0.875154	86.0034	539.672	0.159362
4049	ST4049	chrIV	-	138365	139349	CUTs	CUT476	CUT476	755	371	360	306	709.054	383.328	985	-3.8293	0.0217249	-4.5307	0.0107732	0.719852	0.389165	1.84973	2.01657	33.1348	36.1235	0.917265
4062	ST4062	chrIV	-	187685	187853	CUTs	CUT477	CUT477	73	10	13	43	68.5575	13.8424	169	-4.09133	0.0167169	-4.90529	0.00740728	0.405666	0.0819076	4.95272	2.25683	24.2668	11.0577	2.19455
4064	ST4064	chrIV	-	194149	194397	CUTs	CUT478	CUT478	60	20	47	55	56.3487	50.0456	249	-4.44089	0.0117854	-4.23101	0.0145376	0.2263	0.200986	1.12595	0.810681	19.2017	13.8252	1.38889
4070	ST4070	chrIV	-	215381	215797	CUTs	CUT479	CUT479	1231	75	1735	69	1156.09	1847.43	417	-2.50315	0.0818268	-2.94921	0.0523812	2.77239	4.43028	0.625782	1.56214	33.8812	84.5776	0.400593
4071	ST4071	chrIV	-	215797	216588	CUTs	CUT480	CUT480	209	1221	23	3253	196.281	24.4904	792	-3.49358	0.0303918	-4.31889	0.0133147	0.24783	0.0309222	8.01462	2.28258	8.15449	2.32241	3.51121
4080	ST4080	chrIV	-	247781	248021	CUTs	CUT481	CUT481	694	3	689	12	651.766	733.647	241	-4.32458	0.0132391	-3.92133	0.0198148	2.70442	3.04418	0.888392	0.668142	204.276	153.632	1.32965
4093	ST4093	chrIV	-	292261	292573	CUTs	CUT482	CUT482	167	83	128	81	156.837	136.294	313	-3.60074	0.0273035	-3.90005	0.020241	0.501077	0.435445	1.15072	1.34892	18.3521	21.513	0.853068
4100	ST4100	chrIV	-	303837	304845	CUTs	CUT483	CUT483	707	14	776	625	663.975	826.284	1009	-3.71497	0.0243561	-4.56929	0.0103653	0.658053	0.818914	0.803567	2.34977	27.018	79.0054	0.341977
4102	ST4102	chrIV	-	309525	309717	CUTs	CUT484	CUT484	1425	855	378	203	1338.28	402.494	193	-3.03733	0.0479628	-5.06861	0.00629117	6.9341	2.08546	3.32497	7.62383	144.572	331.49	0.436128
4116	ST4116	chrIV	-	340245	340405	CUTs	CUT485	CUT485	400	1	153	4	375.658	162.914	161	-4.72143	0.00890245	-2.73494	0.064898	2.33328	1.01189	2.30586	0.137176	262.094	15.592	16.8095
4119	ST4119	chrIV	-	345077	345445	CUTs	CUT486	CUT486	69	7	22	5	64.801	23.4256	369	-5.01541	0.00663493	-4.97178	0.00693081	0.175612	0.063484	2.76625	0.95731	26.4678	9.15967	2.88961
4120	ST4120	chrIV	-	352269	352621	CUTs	CUT487	CUT487	328	70	184	127	308.039	195.923	353	-4.53821	0.0106925	-4.86033	0.00774796	0.872633	0.555023	1.57225	1.38004	81.6115	71.6347	1.13927
4122	ST4122	chrIV	-	356909	357141	CUTs	CUT488	CUT488	60	3	133	6	56.3487	141.618	233	-4.52263	0.0108604	-4.60367	0.010015	0.24184	0.607804	0.397891	1.08441	22.2681	60.6894	0.366919
4128	ST4128	chrIV	-	368261	368429	CUTs	CUT489	CUT489	185	5	247	3	173.742	263.005	169	-2.71538	0.0661797	-4.43693	0.0118323	1.02806	1.55624	0.660601	5.59316	15.5343	131.526	0.118109
4142	ST4142	chrIV	-	407405	407589	CUTs	CUT490	CUT490	63	0	76	11	59.1661	80.9247	185	-3.92373	0.0197672	-2.61356	0.0732732	0.319817	0.437431	0.731125	0.269773	16.1792	5.96986	2.71014
4145	ST4145	chrIV	-	413837	414797	CUTs	CUT491	CUT491	246	96	348	1716	231.029	370.55	961	-4.37523	0.0125853	-4.54799	0.0105885	0.240405	0.385588	0.623477	1.18858	19.1021	36.4157	0.524557
4150	ST4150	chrIV	-	428461	428725	CUTs	CUT492	CUT492	186	515	99	87	174.681	105.415	265	-2.7835	0.061822	-3.48071	0.0307856	0.659173	0.397793	1.65708	2.00815	10.6624	12.9214	0.825176
4161	ST4161	chrIV	-	470533	470773	CUTs	CUT493	CUT493	25	157	50	180	23.4786	53.24	241	-2.07945	0.124999	-2.86657	0.0568939	0.0974216	0.220913	0.440996	2.19706	0.779376	3.88289	0.200721
4174	ST4174	chrIV	-	505375	506535	CUTs	CUT494	CUT494	286	334	154	129	268.595	163.979	1161	-4.34638	0.0129537	-4.20566	0.0149109	0.231348	0.14124	1.63798	0.86874	17.8597	9.47224	1.88547
4182	ST4182	chrIV	-	547663	547799	CUTs	CUT495	CUT495	41	63	25	28	38.5049	26.62	137	-0.927058	0.395716	-2.70202	0.0670697	0.281058	0.194306	1.44647	5.90007	0.710251	2.89708	0.245161
4185	ST4185	chrIV	-	555407	555647	CUTs	CUT496	CUT496	1854	21	818	19	1741.17	871.006	241	-2.70395	0.0669407	-4.85914	0.00775712	7.22479	3.61413	1.99904	8.62958	107.928	465.911	0.23165
4187	ST4187	chrIV	-	556511	556671	CUTs	CUT497	CUT497	26	3	69	2	24.4178	73.4711	161	-4.4385	0.0118137	-4.18723	0.0151883	0.151663	0.456342	0.332345	0.777814	12.8379	30.0456	0.42728
4191	ST4191	chrIV	-	562511	562855	CUTs	CUT498	CUT498	99	20	197	14	92.9753	209.765	345	-4.59317	0.0101207	-4.71664	0.0089452	0.269494	0.608016	0.443235	1.13141	26.6279	67.9712	0.391753
4196	ST4196	chrIV	-	578423	578983	CUTs	CUT499	CUT499	173	508	122	777	162.472	129.905	561	-4.05388	0.0173549	-4.47794	0.0113567	0.289611	0.231561	1.25069	1.52816	16.6876	20.3897	0.818433
4204	ST4204	chrIV	-	598423	598879	CUTs	CUT500	CUT500	16	225	102	200	15.0263	108.61	457	-3.50711	0.0299836	-2.55077	0.0780213	0.0328803	0.237658	0.138352	0.3843	1.09661	3.04606	0.360009
4207	ST4207	chrIV	-	602935	603239	CUTs	CUT501	CUT501	47	271	165	320	44.1398	175.692	305	-2.89801	0.0551329	-2.26791	0.103528	0.144721	0.576039	0.251234	0.532541	2.62494	5.5641	0.471764
4215	ST4215	chrIV	-	620808	621064	CUTs	CUT502	CUT502	55	6	83	22	51.6529	88.3783	257	-2.64687	0.0708725	-3.73025	0.0239868	0.200984	0.343885	0.584452	2.95464	2.83586	14.3364	0.197808
4219	ST4219	chrIV	-	629440	630688	CUTs	CUT503	CUT503	1104	1087	169	706	1036.82	179.951	1249	-3.83732	0.0215512	-4.80926	0.0081539	0.830116	0.144076	5.76165	2.64305	38.5184	17.6696	2.17992
4232	ST4232	chrIV	-	687248	687856	CUTs	CUT504	CUT504	492	92	154	99	462.059	163.979	609	-3.64856	0.0260286	-4.22057	0.0146902	0.758718	0.26926	2.81779	1.77184	29.1493	18.3292	1.59032
4233	ST4233	chrIV	-	690224	690480	CUTs	CUT505	CUT505	31	166	264	64	29.1135	281.107	257	-1.31799	0.267672	-3.61989	0.0267856	0.113282	1.0938	0.103567	9.99313	0.423213	40.8355	0.0103638
4237	ST4237	chrIV	-	703360	703832	CUTs	CUT506	CUT506	306	263	92	199	287.378	97.9615	473	-3.64414	0.0261438	-4.10626	0.0164693	0.607565	0.207107	2.93358	1.58743	23.2393	12.5754	1.84801
4238	ST4238	chrIV	-	703832	704184	CUTs	CUT507	CUT507	1179	55	522	56	1107.25	555.825	353	-4.41832	0.0120544	-4.82258	0.00804604	3.13669	1.57458	1.99209	1.49818	260.211	195.696	1.32967
4251	ST4251	chrIV	-	750912	751344	CUTs	CUT508	CUT508	103	50	178	29	96.7319	189.534	433	-4.77816	0.00841147	-4.94375	0.00712781	0.223399	0.437723	0.510366	1.18009	26.5589	61.4107	0.43248
4255	ST4255	chrIV	-	768104	768368	CUTs	CUT509	CUT509	677	4	842	5	635.801	896.561	265	-3.33351	0.0356676	-2.92682	0.0535669	2.39925	3.38325	0.709155	0.665851	67.2669	63.1593	1.06504
4257	ST4257	chrIV	-	769696	770200	CUTs	CUT510	CUT510	1068	1936	504	491	1003.01	536.659	505	-4.83697	0.00793107	-4.04155	0.0175703	1.98615	1.06269	1.86898	0.451392	250.427	60.4824	4.14049
4259	ST4259	chrIV	-	781232	781352	CUTs	CUT511	CUT511	10	4	6	0	9.39144	6.38879	121	-2.74095	0.0645089	-2.14559	0.116999	0.0776152	0.0528	1.46999	0.551361	1.20317	0.451284	2.66611
4261	ST4261	chrIV	-	784264	784432	CUTs	CUT512	CUT512	106	2	26	2	99.5493	27.6848	169	-3.48736	0.0305815	-4.40925	0.0121643	0.589049	0.163815	3.59581	2.51403	19.2616	13.4669	1.4303
4262	ST4262	chrIV	-	784432	784640	CUTs	CUT513	CUT513	266	41	75	23	249.812	79.8599	209	-5.00889	0.00667833	-5.0077	0.00668625	1.19527	0.382105	3.12813	0.998816	178.978	57.1479	3.13184
4271	ST4271	chrIV	-	831561	831753	CUTs	CUT514	CUT514	15	1	7	1	14.0872	7.45359	193	-2.19585	0.111264	-5.06451	0.00631701	0.0729905	0.0386197	1.88998	17.6135	0.656009	6.1136	0.107303
4282	ST4282	chrIV	-	892025	892441	CUTs	CUT515	CUT515	1482	101	974	43	1391.81	1037.11	417	-4.71731	0.0089392	-4.82926	0.00799243	3.33768	2.48708	1.342	1.11846	373.375	311.18	1.19987
4314	ST4314	chrIV	-	1004457	1005321	CUTs	CUT516	CUT516	719	221	525	201	675.245	559.02	865	-3.39113	0.0336705	-4.18794	0.0151775	0.78063	0.646265	1.20791	2.21845	23.1844	42.5805	0.544484
4315	ST4315	chrIV	-	1010913	1011425	CUTs	CUT517	CUT517	390	24	333	28	366.266	354.578	513	-4.98602	0.00683282	-4.79525	0.00826889	0.713969	0.691185	1.03296	0.826328	104.491	83.5886	1.25006
4319	ST4319	chrIV	-	1019969	1020385	CUTs	CUT518	CUT518	100	92	32	64	93.9144	34.0736	417	-4.94554	0.00711509	-5.11171	0.00602578	0.225214	0.0817112	2.75622	1.18077	31.6531	13.5603	2.33425
4324	ST4324	chrIV	-	1031729	1032097	CUTs	CUT519	CUT519	60	16	45	25	56.3487	47.916	369	-4.61306	0.00992145	-4.43069	0.0119063	0.152706	0.129854	1.17599	0.833296	15.3915	10.9063	1.41125
4326	ST4326	chrIV	-	1036633	1037001	CUTs	CUT520	CUT520	175	37	108	200	164.35	114.998	369	-4.60852	0.0099666	-4.69477	0.00914299	0.445394	0.311649	1.42915	1.09008	44.6886	34.086	1.31105
4338	ST4338	chrIV	-	1077457	1077889	CUTs	CUT521	CUT521	66	68	69	109	61.9835	73.4711	433	-1.72861	0.177532	-1.1061	0.330847	0.143149	0.169679	0.843644	0.536597	0.806329	0.512863	1.57221
4357	ST4357	chrIV	-	1145721	1146057	CUTs	CUT522	CUT522	293	80	183	79	275.169	194.858	337	-4.19528	0.0150666	-4.93622	0.00718171	0.816526	0.578214	1.41215	2.09791	54.1945	80.5121	0.673123
4362	ST4362	chrIV	-	1166153	1166433	CUTs	CUT523	CUT523	40	39	318	30	37.5658	338.606	281	-4.93877	0.00716338	-4.39378	0.0123539	0.133686	1.205	0.110942	0.579849	18.6624	97.5405	0.19133
4368	ST4368	chrIV	-	1182385	1182945	CUTs	CUT524	CUT524	348	442	1331	295	326.822	1417.25	561	-4.04673	0.0174794	-4.14865	0.0157857	0.582571	2.52629	0.230603	1.1073	33.329	160.037	0.208258
4375	ST4375	chrIV	-	1204225	1204401	CUTs	CUT525	CUT525	122	2	75	5	114.576	79.8599	177	-3.13907	0.0433231	-4.66139	0.00945335	0.64732	0.451186	1.43471	4.58283	14.9417	47.7277	0.313061
4384	ST4384	chrIV	-	1233553	1233673	CUTs	CUT526	CUT526	45	3	133	9	42.2615	141.618	121	-2.23237	0.107274	-0.233358	0.79187	0.349269	1.1704	0.298418	0.135469	3.25586	1.47802	2.20285
4394	ST4394	chrIV	-	1260361	1260569	CUTs	CUT527	CUT527	41	57	25	103	38.5049	26.62	209	-4.40618	0.0122017	-4.9328	0.00720626	0.184234	0.127368	1.44647	1.69321	15.099	17.6747	0.854275
4397	ST4397	chrIV	-	1268921	1269745	CUTs	CUT528	CUT528	343	513	608	109	322.126	647.398	825	-4.91606	0.00732797	-4.85672	0.00777597	0.390456	0.784725	0.497571	0.942387	53.283	100.917	0.52799
4398	ST4398	chrIV	-	1275033	1276505	CUTs	CUT529	CUT529	163	68	294	175	153.081	313.051	1473	-3.689	0.0249969	-3.30846	0.0365723	0.103924	0.212526	0.488996	0.683493	4.15749	5.81112	0.715436
4400	ST4400	chrIV	-	1279065	1279169	CUTs	CUT530	CUT530	7	4	59	49	6.57401	62.8232	105	-3.85944	0.0210798	-1.37632	0.252507	0.0626096	0.598316	0.104643	0.0834822	2.97012	2.3695	1.25348
4409	ST4409	chrIV	-	1299953	1300305	CUTs	CUT531	CUT531	11	36	7	45	10.3306	7.45359	353	-4.80008	0.00822906	-4.77274	0.00845715	0.0292651	0.021115	1.38599	0.97303	3.55632	2.4967	1.4244
4410	ST4410	chrIV	-	1300305	1300969	CUTs	CUT532	CUT532	1809	164	295	91	1698.91	314.116	665	-4.6539	0.00952442	-4.90201	0.00743161	2.55475	0.472355	5.40855	1.28161	268.232	63.5602	4.22013
4430	ST4430	chrIV	-	1383545	1383897	CUTs	CUT533	CUT533	8	197	7	207	7.51315	7.45359	353	-4.81289	0.00812437	-4.98772	0.00682122	0.0212837	0.021115	1.00799	1.19104	2.61974	3.09549	0.846309
4431	ST4431	chrIV	-	1383897	1384761	CUTs	CUT534	CUT534	282	408	151	455	264.839	160.785	865	-4.73987	0.00873979	-4.8356	0.0079419	0.306172	0.185878	1.64716	1.10047	35.032	23.4048	1.49679
4447	ST4447	chrIV	-	1435785	1436409	CUTs	CUT535	CUT535	97	408	155	276	91.097	165.044	625	-4.65808	0.00948463	-4.77306	0.00845451	0.145755	0.26407	0.551956	1.12184	15.3675	31.2343	0.492008
4448	ST4448	chrIV	-	1436409	1436689	CUTs	CUT536	CUT536	402	122	243	122	377.536	258.746	281	-4.58761	0.0101772	-4.79444	0.00827564	1.34354	0.920805	1.4591	1.22978	132.015	111.267	1.18648
4464	ST4464	chrIV	-	1476513	1476633	CUTs	CUT537	CUT537	53	0	86	0	49.7746	91.5727	121	-0.592539	0.552922	-1.46491	0.231099	0.411361	0.756799	0.543553	2.39257	0.743976	3.27478	0.227184
4469	ST4469	chrIV	-	1489081	1489225	CUTs	CUT538	CUT538	618	0	635	1	580.391	676.147	145	-4.03039	0.0177674	-5.19856	0.00552451	4.0027	4.66309	0.85838	3.2161	225.283	844.072	0.266901
4471	ST4471	chrIV	-	1492145	1492377	CUTs	CUT539	CUT539	189	101	43	41	177.498	45.7864	233	-4.58264	0.0102279	-4.9848	0.00684115	0.761795	0.196508	3.87666	1.49505	74.4822	28.7244	2.59299
4480	ST4480	chrIV	-	1507897	1508033	CUTs	CUT540	CUT540	3	2	9	21	2.81743	9.58319	137	-2.54419	0.078537	-1.99104	0.136553	0.0205652	0.0699503	0.293997	0.57514	0.261854	0.512258	0.511175
4179	ST4179	chrIV	-	541615	541695	other	snR47	SNR47	3279	5	2803	12	3079.45	2984.63	81	-0.0140238	0.986074	-0.207513	0.812603	38.018	36.8473	1.03177	1.21348	38.5549	45.3448	0.85026
4109	ST4109	chrIV	-	323045	323653	other	snR63	SNR63	14433	1166	14667	370	13554.7	15617.4	609	1.07395	2.92693	-3.2541	0.0386157	22.2573	25.6444	0.86792	75.7962	7.60431	664.091	0.0114507
4472	ST4472	chrIV	-	1492377	1493113	other	snR84	SNR84	6222	226	4045	57	5843.36	4307.11	737	0.127255	1.13571	-0.127296	0.880473	7.92857	5.84411	1.35668	1.28988	6.98118	6.63747	1.05178
4048	ST4048	chrIV	-	134733	135493	SUTs	SUT460	SUT460	152	362	507	3678	142.75	539.853	761	-1.08215	0.338865	-0.529442	0.588934	0.187582	0.7094	0.264424	0.575387	0.55356	1.20455	0.459558
4075	ST4075	chrIV	-	232253	234341	SUTs	SUT461	SUT461	495	1585	118	2201	464.876	125.646	2089	-3.01497	0.0490474	-3.86173	0.0210316	0.222535	0.0601466	3.69988	2.33208	4.53715	2.85982	1.58651
4129	ST4129	chrIV	-	370933	371981	SUTs	SUT462	SUT462	423	1279	377	3691	397.258	401.429	1049	-2.3957	0.0911092	-1.877	0.153048	0.378702	0.382678	0.989609	0.595297	4.15657	2.50037	1.66238
4144	ST4144	chrIV	-	411397	411565	SUTs	SUT463	SUT463	5	4	19	8	4.69572	20.2312	169	-3.23109	0.0395142	-2.73927	0.0646177	0.0277853	0.119711	0.232103	0.611508	0.703173	1.85261	0.379559
4152	ST4152	chrIV	-	433309	434069	SUTs	SUT464	SUT464	947	1005	23	627	889.37	24.4904	761	-2.58793	0.0751757	-4.71419	0.0089671	1.16869	0.0321818	36.3151	8.3835	15.5461	3.58888	4.33173
4154	ST4154	chrIV	-	443805	444197	SUTs	SUT465	SUT465	360	38	313	251	338.092	333.282	393	-2.28715	0.101555	-3.8129	0.022084	0.860285	0.848046	1.01443	4.59858	8.47111	38.4009	0.220596
4162	ST4162	chrIV	-	470773	471533	SUTs	SUT466	SUT466	717	172	312	266	673.366	332.217	761	-2.59778	0.074439	-3.09721	0.0451749	0.884844	0.436554	2.02689	1.6478	11.8868	9.66363	1.23006
4168	ST4168	chrIV	-	488934	489222	SUTs	SUT467	SUT467	1154	1	481	4	1083.77	512.168	289	-4.18524	0.0152186	-4.34246	0.0130045	3.75008	1.77221	2.11605	1.17026	246.414	136.277	1.80819
4175	ST4175	chrIV	-	506543	507447	SUTs	SUT468	SUT468	437	394	506	282	410.406	538.788	905	-2.24176	0.106271	-3.92459	0.0197503	0.453487	0.595346	0.76172	5.38073	4.26727	30.1436	0.141564
4181	ST4181	chrIV	-	544983	545967	SUTs	SUT469	SUT469	202	27	63	239	189.707	67.0823	985	-1.69806	0.183038	-3.31746	0.0362447	0.192596	0.0681039	2.82797	5.05005	1.05222	1.879	0.559989
4195	ST4195	chrIV	-	575095	575855	SUTs	SUT470	SUT470	387	224	171	273	363.449	182.081	761	-2.32286	0.0979926	-2.92853	0.0534757	0.477594	0.239265	1.99609	1.83247	4.87377	4.47427	1.08929
4203	ST4203	chrIV	-	593223	593495	SUTs	SUT471	SUT471	124	53	113	112	116.454	120.322	273	-1.62801	0.19632	-2.63993	0.0713665	0.426571	0.440741	0.96785	2.75087	2.17284	6.17574	0.351834
4205	ST4205	chrIV	-	598879	600279	SUTs	SUT472	SUT472	434	174	1733	336	407.589	1845.3	1401	-2.78562	0.0616907	-2.12096	0.119916	0.290927	1.31713	0.22088	0.51445	4.7159	10.9838	0.429352
4216	ST4216	chrIV	-	621064	621648	SUTs	SUT473	SUT473	655	7	597	26	615.139	635.685	585	-2.74036	0.0645473	-2.65915	0.0700079	1.05152	1.08664	0.96768	0.921999	16.2907	15.5217	1.04954
4285	ST4285	chrIV	-	908497	909409	SUTs	SUT474	SUT474	418	273	329	246	392.562	350.319	913	-3.22624	0.0397066	-3.89122	0.0204204	0.42997	0.383701	1.12059	1.94446	10.8287	18.7901	0.576297
4286	ST4286	chrIV	-	910089	913769	SUTs	SUT475	SUT475	660	676	886	1097	619.835	943.412	3681	-2.47654	0.0840339	-2.82388	0.0593749	0.168388	0.256292	0.657014	1.41531	2.00381	4.31651	0.464219
4288	ST4288	chrIV	-	916057	916337	SUTs	SUT476	SUT476	242	1802	116	2118	227.273	123.517	281	-3.65547	0.0258494	-3.40524	0.0331988	0.8088	0.439561	1.84002	0.778625	31.2889	13.2403	2.36316
4290	ST4290	chrIV	-	924281	924537	SUTs	SUT477	SUT477	296	44	169	57	277.987	179.951	257	-1.13364	0.32186	0.0458017	1.04687	1.08166	0.700199	1.54479	0.307451	3.36065	0.668852	5.02451
4292	ST4292	chrIV	-	927521	927641	SUTs	SUT478	SUT478	0	181	0	205	0	0	121	-2.37759	0.0927735	-3.46405	0.0313026	0	0	#DIV/0!	2.96376	0	0	#DIV/0!
4309	ST4309	chrIV	-	980065	980921	SUTs	SUT479	SUT479	354	16	169	48	332.457	179.951	857	-1.05936	0.346677	-1.11263	0.328694	0.387931	0.209978	1.84749	1.05471	1.119	0.638825	1.75165
4318	ST4318	chrIV	-	1018121	1019129	SUTs	SUT480	SUT480	327	15	204	14	307.1	217.219	1009	-2.25397	0.104981	-2.92963	0.0534168	0.304361	0.215281	1.41378	1.96532	2.89919	4.03022	0.719363
4345	ST4345	chrIV	-	1102465	1103561	SUTs	SUT481	SUT481	204	62	336	52	191.585	357.773	1097	-1.6355	0.194854	-0.745789	0.47436	0.174645	0.326137	0.535495	0.410773	0.896285	0.687531	1.30363
4355	ST4355	chrIV	-	1130849	1131345	SUTs	SUT482	SUT482	82	325	197	217	77.0098	209.765	497	-1.70566	0.181652	-0.396981	0.672347	0.154949	0.422063	0.367124	0.270176	0.853002	0.627746	1.35883
4366	ST4366	chrIV	-	1174609	1174817	SUTs	SUT483	SUT483	126	114	72	61	118.332	76.6655	209	-1.77478	0.169521	-0.895979	0.408208	0.566183	0.366821	1.54349	0.415282	3.33989	0.898613	3.71672
4369	ST4369	chrIV	-	1183017	1183465	SUTs	SUT484	SUT484	65	1243	87	889	61.0444	92.6375	449	-3.60035	0.0273142	-2.55495	0.0776961	0.135956	0.20632	0.658959	0.351551	4.9775	2.65547	1.87443
4385	ST4385	chrIV	-	1234033	1236185	SUTs	SUT485	SUT485	742	343	312	2962	696.845	332.217	2153	-1.48333	0.226882	-3.70909	0.0244999	0.323662	0.154304	2.09756	9.26052	1.42657	6.29817	0.226505
4390	ST4390	chrIV	-	1251057	1251449	SUTs	SUT486	SUT486	79	209	25	435	74.1924	26.62	393	-4.02374	0.0178859	-4.13524	0.0159988	0.188785	0.0677353	2.78709	1.11795	10.5549	4.23377	2.49303
4393	ST4393	chrIV	-	1259729	1260137	SUTs	SUT487	SUT487	17	329	42	306	15.9655	44.7216	409	-2.26787	0.103533	-1.73454	0.176481	0.0390353	0.109344	0.356997	0.586651	0.377033	0.619576	0.608534
4395	ST4395	chrIV	-	1260569	1261385	SUTs	SUT488	SUT488	653	226	441	264	613.261	469.576	817	-2.83307	0.0588321	-2.61958	0.0728338	0.750626	0.574757	1.30599	0.807758	12.7588	7.89135	1.61681
4401	ST4401	chrIV	-	1279169	1279937	SUTs	SUT489	SUT489	190	66	305	586	178.437	324.764	769	-1.69926	0.18282	-2.18471	0.112511	0.232038	0.42232	0.549438	1.62491	1.26922	3.7536	0.338134
4404	ST4404	chrIV	-	1291081	1292145	SUTs	SUT490	SUT490	77	114	50	172	72.3141	53.24	1065	-2.13299	0.118482	-3.76546	0.023157	0.0679006	0.0499906	1.35827	5.11648	0.573086	2.15877	0.265469
4418	ST4418	chrIV	-	1338257	1339409	SUTs	SUT491	SUT491	113	370	118	437	106.123	125.646	1153	-2.84617	0.0580661	-2.57872	0.0758709	0.092041	0.108973	0.844619	0.765327	1.58511	1.4363	1.10361
4419	ST4419	chrIV	-	1340729	1342209	SUTs	SUT492	SUT492	415	85	339	117	389.745	360.967	1481	-1.88427	0.151939	-1.73556	0.176302	0.263163	0.243732	1.07972	0.861813	1.73203	1.38247	1.25285
4422	ST4422	chrIV	-	1353241	1353553	SUTs	SUT493	SUT493	156	4	63	4	146.507	67.0823	313	-2.10685	0.12162	-2.70393	0.0669422	0.468072	0.214321	2.18398	1.81679	3.84865	3.20158	1.20211
4454	ST4454	chrIV	-	1451113	1452825	SUTs	SUT494	SUT494	82	117	78	143	77.0098	83.0543	1713	-2.99984	0.0497951	-2.99665	0.0499542	0.0449561	0.0484847	0.927222	0.996817	0.902821	0.970585	0.930183
4465	ST4465	chrIV	-	1476649	1476993	SUTs	SUT495	SUT495	188	12	160	22	176.559	170.368	345	-1.65354	0.191371	-2.1448	0.117091	0.511766	0.49382	1.03634	1.63438	2.6742	4.2174	0.634088
4473	ST4473	chrIV	-	1493649	1493945	SUTs	SUT496	SUT496	32	44	70	76	30.0526	74.5359	297	-3.10697	0.0447364	-2.61891	0.072882	0.101187	0.250963	0.403196	0.61382	2.26186	3.44341	0.656864
4479	ST4479	chrIV	-	1507393	1507489	SUTs	SUT497	SUT497	2	2	4	6	1.87829	4.2592	97	-3.79284	0.0225315	-4.48387	0.0112896	0.0193638	0.0439092	0.440996	1.99578	0.859411	3.88936	0.220965
4481	ST4481	chrIV	-	1508033	1509817	SUTs	SUT498	SUT498	340	16	561	125	319.309	597.352	1785	-2.28525	0.101749	-1.49706	0.223788	0.178885	0.334651	0.534541	0.454667	1.7581	1.4954	1.17567
4482	ST4482	chrIV	-	1514041	1516433	SUTs	SUT499	SUT499	270	160	363	321	253.569	386.522	2393	-2.56671	0.076788	-2.58157	0.0756549	0.105963	0.161522	0.656027	1.01498	1.37994	2.13498	0.646346
4155	ST4155	chrIV	-	446709	447685	ORF-T	YDL002C	NHP10	706	22	794	18	663.036	845.451	977	0.961658	2.61603	1.29842	3.66349	0.678645	0.865354	0.78424	0.714081	0.259418	0.23621	1.09825
4153	ST4153	chrIV	-	440813	442357	ORF-T	YDL005C	MED2	721	68	1004	89	677.123	1069.06	1545	0.692657	1.99902	1.32867	3.77602	0.438267	0.691947	0.633383	0.529399	0.219241	0.183248	1.19642
4151	ST4151	chrIV	-	430933	432061	ORF-T	YDL012C	YDL012C	1388	186	904	167	1303.53	962.578	1129	0.14446	1.15542	0.246881	1.28003	1.15459	0.852594	1.35421	0.90265	0.999285	0.666075	1.50026
4149	ST4149	chrIV	-	425757	426981	other	YDL016C, YDL015C	YDL016C, TSC13	2216	70	1684	70	2081.14	1793.12	1225	1.71545	5.55917	1.80455	6.07726	1.69889	1.46377	1.16063	0.914749	0.305602	0.240861	1.26879
4148	ST4148	chrIV	-	422645	423581	ORF-T	YDL018C	ERP3	497	15	869	17	466.755	925.31	937	0.375366	1.45552	0.505653	1.65807	0.498137	0.987525	0.50443	0.877844	0.342239	0.595588	0.574624
4147	ST4147	chrIV	-	417509	421757	ORF-T	YDL019C	OSH2	1004	95	2287	62	942.901	2435.2	4249	-0.316987	0.72834	-0.462059	0.629985	0.221911	0.573122	0.387197	1.15612	0.304681	0.909739	0.33491
4146	ST4146	chrIV	-	414973	416957	ORF-T	YDL020C	RPN4	2395	53	2669	117	2249.25	2841.95	1985	0.9456	2.57436	1.44494	4.2416	1.13312	1.43171	0.791446	0.60693	0.440158	0.33754	1.30402
4143	ST4143	chrIV	-	408205	409837	ORF-T	YDL024C, YDL022C-A	DIA3, YDL022C-A	98	133	361	111	92.0361	384.392	1633	-3.80772	0.0221988	-0.555908	0.573551	0.0563602	0.23539	0.239433	0.038704	2.53889	0.410409	6.18625
4141	ST4141	chrIV	-	405125	407405	ORF-T	YDL025C	YDL025C	696	213	1485	69	653.644	1581.23	2281	0.250516	1.28469	0.864157	2.37301	0.28656	0.693216	0.413378	0.541376	0.223058	0.292126	0.763569
4140	ST4140	chrIV	-	403493	404997	ORF-T	YDL027C	YDL027C	671	15	1366	21	630.166	1454.52	1505	1.07787	2.93843	1.80364	6.07171	0.418715	0.966456	0.433248	0.483953	0.142496	0.159173	0.895226
4139	ST4139	chrIV	-	400845	403421	ORF-T	YDL028C	MPS1	818	61	842	146	768.22	896.561	2577	-0.959129	0.383227	-0.464762	0.628285	0.298106	0.347909	0.856852	0.609957	0.777885	0.553744	1.40478
4138	ST4138	chrIV	-	392493	393957	ORF-T	YDL033C	SLM3	2510	198	1539	180	2357.25	1638.73	1465	-0.96036	0.382755	-0.455243	0.634294	1.60905	1.11858	1.43847	0.603435	4.20385	1.76351	2.3838
4137	ST4137	chrIV	-	389045	392341	ORF-T	YDL035C	GPR1	1244	71	1690	41	1168.3	1799.51	3297	-0.110694	0.895212	0.420318	1.52245	0.354351	0.545802	0.64923	0.58801	0.395829	0.358504	1.10411
4136	ST4136	chrIV	-	387349	388901	ORF-T	YDL036C	PUS9	784	446	263	31	736.289	280.042	1553	-0.391963	0.675729	-1.02603	0.358427	0.474108	0.180323	2.62921	1.88526	0.701624	0.503097	1.39461
4135	ST4135	chrIV	-	381957	385765	other	YDL039C, YDL038C, YDL037C	PRM7, YDL038C, BSC1	3257	65	111	127	3058.79	118.193	3809	1.21367	3.36582	-2.66632	0.0695073	0.803044	0.0310299	25.8797	48.4239	0.238588	0.446426	0.53444
4134	ST4134	chrIV	-	378861	381477	ORF-T	YDL040C	NAT1	2698	56	1446	30	2533.81	1539.7	2617	1.01879	2.76985	0.322883	1.3811	0.968212	0.588345	1.64565	2.00554	0.349553	0.425997	0.820554
4133	ST4133	chrIV	-	376637	378509	ORF-T	YDL042C	SIR2	554	11	288	32	520.286	306.662	1873	-1.37643	0.252478	-0.893423	0.409252	0.277782	0.163728	1.69661	0.616926	1.10022	0.400066	2.7501
4132	ST4132	chrIV	-	375429	376525	ORF-T	YDL043C	PRP11	538	23	272	28	505.26	289.625	1097	0.0689492	1.07138	-0.342892	0.709715	0.460583	0.264016	1.74453	1.50959	0.429896	0.372003	1.15563
4131	ST4131	chrIV	-	373885	375317	ORF-T	YDL044C	MTF2	555	41	514	42	521.225	547.307	1433	-1.19522	0.302639	-0.472882	0.623203	0.36373	0.381931	0.952345	0.485618	1.20186	0.612851	1.9611
4130	ST4130	chrIV	-	372605	373733	ORF-T	YDL045C	FAD1	634	135	854	201	595.417	909.338	1129	-0.00667346	0.993349	0.419734	1.52156	0.527385	0.805437	0.654781	0.65285	0.530916	0.529351	1.00296
4127	ST4127	chrIV	-	366637	368261	ORF-T	YDL048C	STP4	576	472	1919	319	540.947	2043.35	1625	1.62544	5.08063	1.49301	4.45046	0.332891	1.25745	0.264735	1.1416	0.0655215	0.282543	0.231899
4126	ST4126	chrIV	-	364869	365973	ORF-T	YDL049C	KNH1	617	258	1698	148	579.452	1808.03	1105	-1.92373	0.146062	1.22507	3.40441	0.524391	1.63623	0.320488	0.0429037	3.5902	0.48062	7.46994
4125	ST4125	chrIV	-	362605	363629	ORF-T	YDL052C	SLC1	2050	136	1644	104	1925.25	1750.53	1025	0.737617	2.09095	0.284732	1.32941	1.87829	1.70783	1.09981	1.57284	0.898295	1.28466	0.699248
4124	ST4124	chrIV	-	361517	362445	ORF-T	YDL053C	PBP4	964	73	1073	26	905.335	1142.53	929	0.915955	2.49916	1.57124	4.8126	0.974526	1.22985	0.792395	0.519295	0.389942	0.255547	1.52591
4123	ST4123	chrIV	-	359773	361381	ORF-T	YDL054C	MCH1	563	105	533	98	528.738	567.538	1609	-0.0782773	0.924708	0.0370021	1.0377	0.328613	0.352727	0.931635	0.891117	0.355369	0.339914	1.04547
4121	ST4121	chrIV	-	355469	356909	ORF-T	YDL055C	PSA1	11002	52	4664	68	10332.5	4966.22	1441	2.7263	15.2762	2.49061	12.0687	7.17034	3.44637	2.08055	1.26578	0.469379	0.285564	1.64369
4118	ST4118	chrIV	-	343981	345077	ORF-T	YDL059C	RAD59	226	329	221	83	212.247	235.321	1097	-1.07879	0.340008	-0.765079	0.465297	0.193479	0.214513	0.901946	0.730734	0.569042	0.461023	1.2343
4117	ST4117	chrIV	-	340405	341277	ORF-T	YDL061C	RPS29B	7269	92	2163	15	6826.64	2303.16	873	-0.511873	0.599372	-1.41942	0.241854	7.81975	2.63821	2.96403	2.47824	13.0466	10.9083	1.19602
4115	ST4115	chrIV	-	338069	340245	ORF-T	YDL063C	YDL063C	1712	102	164	144	1607.81	174.627	2177	-0.246482	0.781545	-1.32508	0.265782	0.738546	0.0802145	9.20713	2.94055	0.944982	0.301806	3.13109
4114	ST4114	chrIV	-	336197	337317	ORF-T	YDL065C	PEX19	678	99	879	209	636.74	935.958	1121	0.795039	2.21453	1.39801	4.04715	0.568011	0.834932	0.680308	0.547182	0.256493	0.206301	1.24329
4113	ST4113	chrIV	-	333973	334613	ORF-T	YDL067C	COX9	1152	96	4440	77	1081.89	4727.71	641	1.73093	5.64589	2.62299	13.7769	1.68782	7.37552	0.228841	0.409808	0.298947	0.535354	0.558411
4112	ST4112	chrIV	-	333061	333973	ORF-T	YDL069C	CBS1	514	332	1465	243	482.72	1559.93	913	-1.1883	0.304739	-0.691812	0.500668	0.528719	1.70858	0.30945	0.608665	1.73499	3.41259	0.508407
4111	ST4111	chrIV	-	329618	330517	ORF-T	YDL072C	YET3	1826	280	2536	63	1714.88	2700.33	900	2.01507	7.50125	2.2163	9.17329	1.90542	3.00037	0.635062	0.817727	0.254014	0.327076	0.776618
4110	ST4110	chrIV	-	323957	326237	ORF-T	YDL074C	BRE1	2211	179	1260	33	2076.45	1341.65	2281	0.494622	1.63988	0.0323487	1.03288	0.910324	0.588184	1.54769	1.58768	0.555117	0.569461	0.97481
4108	ST4108	chrIV	-	320461	321693	ORF-T	YDL076C	RXT3	627	286	1030	190	588.843	1096.74	1233	0.791897	2.20758	0.956125	2.60159	0.47757	0.889492	0.536902	0.848549	0.216332	0.341902	0.632729
4107	ST4107	chrIV	-	316869	320309	ORF-T	YDL077C	VAM6	625	58	624	117	586.965	664.435	3441	-0.951563	0.386137	-1.0276	0.357865	0.17058	0.193093	0.883405	1.079	0.44176	0.539571	0.818724
4106	ST4106	chrIV	-	315205	316453	ORF-T	YDL078C	MDH3	931	43	4061	2701	874.343	4324.15	1249	1.98276	7.26275	2.20358	9.05742	0.700035	3.46209	0.2022	0.801857	0.096387	0.382238	0.252165
4105	ST4105	chrIV	-	312773	314829	ORF-T	YDL079C	MRK1	60	855	5362	90	56.3487	5709.45	2057	-3.62173	0.0267365	1.77655	5.90945	0.0273936	2.77562	0.00986936	0.00452436	1.02458	0.469692	2.18138
4104	ST4104	chrIV	-	310501	312661	ORF-T	YDL080C	THI3	1056	1079	720	305	991.736	766.655	2161	-1.0695	0.343181	-0.700092	0.496539	0.458925	0.354769	1.29359	0.691146	1.33727	0.714483	1.87166
4103	ST4103	chrIV	-	309717	310213	ORF-T	YDL081C	RPP1A	6780	46	1749	9	6367.4	1862.33	497	3.16919	23.7881	2.4874	12.03	12.8117	3.74715	3.41904	1.9774	0.538574	0.311483	1.72906
4101	ST4101	chrIV	-	306669	307829	ORF-T	YDL083C	RPS16B	7567	218	1350	267	7106.5	1437.48	1161	-1.3223	0.266522	-2.48177	0.0835948	6.12102	1.23814	4.94373	3.18826	22.9663	14.8112	1.5506
4099	ST4099	chrIV	-	302317	302733	ORF-T	YDL085C-A	YDL085C-A	263	85	164	121	246.995	174.627	417	0.637183	1.89115	0.075598	1.07853	0.592314	0.41877	1.41441	1.75345	0.313204	0.388279	0.806647
4098	ST4098	chrIV	-	301517	302149	other	YDL086C-A	YDL086C-A	724	426	507	698	679.94	539.853	633	-3.08996	0.0455039	-4.08699	0.0167897	1.07416	0.852849	1.25949	2.71023	23.6058	50.796	0.464718
4097	ST4097	chrIV	-	300141	301021	ORF-T	YDL087C	LUC7	690	155	346	84	648.01	368.421	881	-1.08451	0.338068	-0.661122	0.516272	0.735539	0.418184	1.75889	0.654825	2.17571	0.810008	2.68604
4096	ST4096	chrIV	-	298269	300109	ORF-T	YDL088C	ASM4	972	40	739	57	912.848	786.887	1841	0.536269	1.70962	0.602689	1.82703	0.495844	0.427423	1.16008	0.935738	0.290032	0.233945	1.23975
4095	ST4095	chrIV	-	294917	296357	ORF-T	YDL090C	RAM1	434	138	572	144	407.589	609.065	1441	0.119817	1.12729	0.279045	1.32187	0.282851	0.422668	0.669204	0.852802	0.250912	0.319751	0.784712
4094	ST4094	chrIV	-	293317	294917	ORF-T	YDL091C	UBX3	413	129	844	146	387.867	898.69	1601	0.115875	1.12286	1.04927	2.85558	0.242265	0.561331	0.431591	0.393215	0.215758	0.196574	1.09759
4092	ST4092	chrIV	-	285317	286749	ORF-T	YDL097C	RPN6	2836	21	2766	14	2663.41	2945.23	1433	1.80411	6.07454	1.90273	6.70416	1.85863	2.05529	0.904313	0.906085	0.30597	0.30657	0.998044
4091	ST4091	chrIV	-	284469	285181	ORF-T	YDL098C	SNU23	329	62	251	55	308.978	267.265	713	-0.379816	0.683987	-0.335017	0.715326	0.43335	0.374845	1.15608	0.956189	0.633564	0.52402	1.20905
4090	ST4090	chrIV	-	281981	283221	ORF-T	YDL100C	GET3	2045	65	1151	111	1920.55	1225.58	1241	1.74191	5.70824	1.50184	4.48993	1.54758	0.987578	1.56705	1.27134	0.271114	0.219954	1.23259
4089	ST4089	chrIV	-	280181	281981	ORF-T	YDL101C	DUN1	465	46	727	54	436.702	774.109	1801	-0.727513	0.483109	-0.944245	0.388973	0.242478	0.429822	0.564135	1.24201	0.501911	1.10502	0.454211
4088	ST4088	chrIV	-	274973	276653	ORF-T	YDL103C	QRI1	680	24	637	50	638.618	678.277	1681	0.862383	2.3688	0.18649	1.20501	0.379904	0.403496	0.94153	1.96579	0.160378	0.334848	0.478958
4087	ST4087	chrIV	-	273621	274885	ORF-T	YDL104C	QRI7	383	135	473	116	359.692	503.65	1265	-0.801807	0.448518	0.189521	1.20867	0.284342	0.398142	0.714171	0.371084	0.633959	0.329405	1.92456
4086	ST4086	chrIV	-	270237	271973	ORF-T	YDL106C	PHO2	456	10	628	30	428.25	668.694	1737	-0.479523	0.619079	0.231588	1.2606	0.246546	0.384971	0.640427	0.491098	0.398246	0.305387	1.30407
4085	ST4085	chrIV	-	265029	267509	ORF-T	YDL109C	YDL109C	532	37	504	260	499.625	536.659	2481	-2.02362	0.132177	-1.20304	0.300281	0.20138	0.216307	0.930991	0.440177	1.52357	0.72035	2.11504
4084	ST4084	chrIV	-	264341	265029	ORF-T	YDL110C	TMA17	230	214	3970	375	216.003	4227.25	689	0.940688	2.56174	2.23977	9.39119	0.313502	6.13534	0.0510978	0.272781	0.122379	0.653309	0.187321
4083	ST4083	chrIV	-	263245	264181	ORF-T	YDL111C	RRP42	1468	126	588	53	1378.66	626.102	937	0.918827	2.50635	0.577238	1.78111	1.47136	0.668198	2.20198	1.40718	0.587053	0.375158	1.56482
4082	ST4082	chrIV	-	256533	258629	ORF-T	YDL113C	ATG20	756	8	1550	14	709.993	1650.44	2097	0.21669	1.24196	0.995576	2.70628	0.338576	0.787048	0.430184	0.458917	0.272614	0.290822	0.937391
4081	ST4081	chrIV	-	253925	255173	ORF-T	YDL115C	IWR1	694	88	891	80	651.766	948.736	1249	0.369983	1.44771	1.35194	3.86491	0.52183	0.759597	0.686984	0.374578	0.360452	0.196537	1.83402
4079	ST4079	chrIV	-	246565	247781	ORF-T	YDL119C	YDL119C	584	91	862	137	548.46	917.857	1217	0.489353	1.63126	-0.548354	0.5779	0.450666	0.754196	0.597544	2.82274	0.276269	1.30506	0.21169
4078	ST4078	chrIV	-	244973	245621	ORF-T	YDL121C	YDL121C	753	119	216	52	707.176	229.997	649	1.86443	6.45224	1.58618	4.88505	1.08964	0.354386	3.07472	1.32081	0.168877	0.072545	2.3279
4077	ST4077	chrIV	-	238909	239813	ORF-T	YDL125C	HNT1	1860	311	4251	867	1746.81	4526.46	905	2.18115	8.85652	2.07232	7.94322	1.93017	5.00161	0.38591	1.11498	0.217938	0.629671	0.346114
4076	ST4076	chrIV	-	236037	238741	ORF-T	YDL126C	CDC48	6735	82	8041	100	6325.14	8562.05	2705	2.171	8.76702	2.0346	7.64918	2.33831	3.16527	0.738741	1.14614	0.266717	0.413805	0.644548
4074	ST4074	chrIV	-	221517	221901	ORF-T	YDL133C-A	RPL41B	6562	36	2897	28	6162.66	3084.72	385	2.98705	19.8271	3.26723	26.2386	16.0069	8.01227	1.9978	0.755649	0.807324	0.305362	2.64382
4073	ST4073	chrIV	-	219573	221301	ORF-T	YDL134C	PPH21	1449	225	1848	82	1360.82	1967.75	1729	1.49873	4.476	1.58973	4.90244	0.787056	1.13808	0.691562	0.913013	0.175839	0.232146	0.75745
4072	ST4072	chrIV	-	218381	219365	ORF-T	YDL135C	RDI1	712	1465	1000	371	668.671	1064.8	985	0.819193	2.26867	1.02685	2.79224	0.678854	1.08101	0.627978	0.81249	0.29923	0.387149	0.772906
4069	ST4069	chrIV	-	211277	212093	ORF-T	YDL139C	SCM3	238	20	253	25	223.516	269.394	817	-1.71592	0.179798	-1.06565	0.344505	0.273582	0.329736	0.8297	0.521902	1.52161	0.957129	1.58976
4068	ST4068	chrIV	-	205237	211165	ORF-T	YDL140C	RPO21	6575	62	5813	117	6174.87	6189.68	5929	0.741226	2.09851	0.264517	1.3028	1.04147	1.04397	0.997608	1.61076	0.496291	0.801324	0.619338
4067	ST4067	chrIV	-	201605	202661	ORF-T	YDL142C	CRD1	405	180	652	112	380.353	694.249	1057	-0.00836598	0.991669	0.489673	1.63178	0.359842	0.656811	0.547863	0.607721	0.362865	0.402511	0.901504
4066	ST4066	chrIV	-	198565	199781	ORF-T	YDL144C	YDL144C	489	565	708	421	459.242	753.878	1217	-0.474455	0.622224	0.158483	1.17173	0.377355	0.619456	0.609172	0.53103	0.606462	0.528667	1.14715
4065	ST4065	chrIV	-	194397	198461	ORF-T	YDL145C	COP1	3787	7760	2647	11543	3556.54	2818.52	4065	1.49012	4.43762	0.645305	1.90657	0.874917	0.693364	1.26184	2.32755	0.197159	0.363671	0.542135
4063	ST4063	chrIV	-	187853	190637	ORF-T	YDL148C	NOP14	1491	15	214	96	1400.26	227.867	2785	0.751209	2.11956	-0.306003	0.736384	0.502788	0.0818194	6.14509	2.87834	0.237213	0.11111	2.13495
4061	ST4061	chrIV	-	181101	183061	ORF-T	YDL153C	SAS10	1963	23	329	45	1843.54	350.319	1961	1.2984	3.66342	0.696412	2.00654	0.940102	0.178643	5.26246	1.82574	0.256619	0.0890304	2.88237
4060	ST4060	chrIV	-	173933	174637	other	YDL158C, YDL157C	YDL158C, YDL157C	800	56	412	75	751.315	438.697	705	1.29617	3.65528	1.36796	3.92731	1.0657	0.622266	1.71261	0.930734	0.291549	0.158446	1.84006
4059	ST4059	chrIV	-	169805	172213	ORF-T	YDL160C	DHH1	2009	24	2492	35	1886.74	2653.48	2409	1.80413	6.07466	1.77812	5.91871	0.783205	1.10149	0.711044	1.02635	0.12893	0.186102	0.692791
4058	ST4058	chrIV	-	169133	169637	ORF-T	YDL160C-A	YDL160C-A	575	114	319	109	540.008	339.671	505	0.926715	2.5262	0.58128	1.78833	1.06932	0.672616	1.5898	1.4126	0.423293	0.376115	1.12544
4057	ST4057	chrIV	-	164805	167301	ORF-T	YDL164C	CDC9	720	197	524	237	676.184	557.955	2497	-0.443854	0.641559	-1.059	0.346801	0.270798	0.22345	1.2119	1.84993	0.422094	0.644318	0.655103
4056	ST4056	chrIV	-	163333	164109	ORF-T	YDL166C	FAP7	733	340	415	15	688.393	441.892	777	0.761852	2.14224	0.449865	1.5681	0.885962	0.568715	1.55783	1.36614	0.413568	0.362678	1.14032
4055	ST4055	chrIV	-	160805	163213	ORF-T	YDL167C	NRP1	2883	57	465	84	2707.55	495.132	2409	0.730717	2.07657	-0.198467	0.819986	1.12393	0.205534	5.46835	2.53244	0.541245	0.250655	2.15932
4054	ST4054	chrIV	-	158109	158749	ORF-T	YDL169C	UGX2	17	33	666	62	15.9655	709.156	641	-2.86967	0.0567176	1.08741	2.96658	0.0249071	1.10633	0.0225133	0.0191188	0.439143	0.37293	1.17755
4053	ST4053	chrIV	-	149101	155933	ORF-T	YDL171C	GLT1	5856	251	3217	197	5499.63	3425.46	6833	0.683355	1.98051	-0.335005	0.715335	0.804863	0.501311	1.60552	2.76865	0.406392	0.700806	0.579891
4052	ST4052	chrIV	-	145749	147629	ORF-T	YDL174C	DLD1	973	258	4743	64	913.787	5050.34	1881	0.24681	1.27994	1.9832	7.26595	0.485799	2.68492	0.180936	0.176155	0.379549	0.369521	1.02714
4051	ST4051	chrIV	-	144277	145549	ORF-T	YDL175C	AIR2	789	43	701	46	740.985	746.424	1273	-1.17014	0.310324	-0.7617	0.466872	0.582078	0.586351	0.992713	0.664687	1.87571	1.25591	1.4935
4050	ST4050	chrIV	-	141093	141797	ORF-T	YDL177C	YDL177C	318	98	297	125	298.648	316.245	705	-0.745782	0.474363	-0.783599	0.456759	0.423614	0.448575	0.944355	1.03854	0.893016	0.982082	0.909309
4045	ST4045	chrIV	-	130765	131901	ORF-T	YDL183C	YDL183C	144	80	601	64	135.237	639.944	1137	-2.28597	0.101675	-0.165159	0.847759	0.118942	0.562836	0.211326	0.119934	1.16982	0.66391	1.76202
4044	ST4044	chrIV	-	130205	130549	ORF-T	YDL184C	RPL41A	7611	82	3614	46	7147.83	3848.18	345	3.26173	26.0947	3.19988	24.5297	20.7183	11.1542	1.85745	1.0638	0.793966	0.454721	1.74605
4043	ST4043	chrIV	-	125653	126477	other	YDL187C	YDL187C	1782	9	549	12	1673.56	584.575	825	-1.94006	0.143695	-2.51599	0.0807833	2.02855	0.708575	2.86286	1.77878	14.117	8.77131	1.60945
4042	ST4042	chrIV	-	123829	125181	ORF-T	YDL188C	PPH22	540	16	830	18	507.138	883.783	1353	0.60287	1.82735	0.774019	2.16846	0.374825	0.653203	0.573826	0.842695	0.205119	0.301228	0.680941
4041	ST4041	chrIV	-	118637	121797	ORF-T	YDL190C	UFD2	1189	674	1183	175	1116.64	1259.66	3161	0.79324	2.21055	0.272391	1.3131	0.353256	0.3985	0.886465	1.68346	0.159805	0.30348	0.526575
4039	ST4039	chrIV	-	104773	106869	ORF-T	YDL197C	ASF2	683	235	1106	101	641.436	1177.67	2097	-0.715659	0.48887	-0.0432593	0.957663	0.305882	0.561597	0.544666	0.510482	0.625693	0.586424	1.06696
4038	ST4038	chrIV	-	103565	104661	ORF-T	YDL198C	GGC1	1812	68	1223	155	1701.73	1302.25	1097	0.729328	2.07369	-0.242061	0.785008	1.55126	1.1871	1.30676	2.64161	0.748068	1.51221	0.494684
4037	ST4037	chrIV	-	101109	103437	ORF-T	YDL199C	YDL199C	227	179	927	289	213.186	987.069	2329	-1.86817	0.154406	-0.279497	0.756164	0.0915353	0.423817	0.215979	0.204196	0.592822	0.560482	1.0577
4036	ST4036	chrIV	-	100413	101109	ORF-T	YDL200C	MGT1	177	133	533	52	166.229	567.538	697	-0.575816	0.562246	1.03577	2.81727	0.238491	0.814258	0.292894	0.199571	0.424176	0.289024	1.46762
4034	ST4034	chrIV	-	96045	98157	ORF-T	YDL203C	ACK1	939	13	545	105	881.856	580.316	2113	-0.601987	0.547722	-0.214719	0.806768	0.417348	0.274641	1.51962	0.678909	0.761971	0.340421	2.23832
4033	ST4033	chrIV	-	92533	93997	ORF-T	YDL205C	HEM3	1376	18	1329	48	1292.26	1415.12	1465	0.907032	2.47696	0.587707	1.79986	0.88209	0.965951	0.913183	1.3762	0.356118	0.536682	0.663555
4031	ST4031	chrIV	-	86037	87261	ORF-T	YDL209C	CWC2	1041	19	539	29	977.649	573.927	1225	-0.839533	0.431912	-0.884473	0.412932	0.798081	0.468512	1.70344	1.04597	1.84778	1.1346	1.62858
4030	ST4030	chrIV	-	79205	80485	ORF-T	YDL211C	YDL211C	405	131	216	130	380.353	229.997	1281	-1.20791	0.29882	-2.0505	0.12867	0.296919	0.179545	1.65373	2.32238	0.993639	1.39539	0.712087
4029	ST4029	chrIV	-	77229	78245	ORF-T	YDL213C	NOP6	970	11	289	40	910.97	307.727	1017	1.29028	3.63382	0.880741	2.41269	0.895742	0.302583	2.96032	1.50613	0.246502	0.125413	1.96551
4028	ST4028	chrIV	-	74437	76613	ORF-T	YDL214C	PRR2	30	403	681	577	28.1743	725.128	2177	-4.13867	0.015944	-0.171745	0.842194	0.0129418	0.333086	0.0388543	0.0189316	0.811702	0.395498	2.05235
4027	ST4027	chrIV	-	70573	74109	ORF-T	YDL215C	GDH2	1611	441	5473	131	1512.96	5827.65	3537	0.231006	1.25987	1.9301	6.89018	0.427753	1.64762	0.259618	0.18285	0.339522	0.239126	1.41984
4026	ST4026	chrIV	-	68965	70333	ORF-T	YDL216C	RRI1	402	121	669	53	377.536	712.351	1369	-1.27113	0.280515	-0.520616	0.594154	0.275775	0.520344	0.529986	0.472125	0.983103	0.875772	1.12256
4025	ST4025	chrIV	-	67573	68773	ORF-T	YDL217C	TIM22	1460	25	799	22	1371.15	850.775	1201	-0.19323	0.824292	-0.178355	0.836645	1.14167	0.708388	1.61165	0.985235	1.38504	0.846701	1.6358
4023	ST4023	chrIV	-	61957	65045	ORF-T	YDL220C	CDC13	574	122	763	834	539.069	812.442	3089	-1.75451	0.172993	-1.74187	0.175192	0.174512	0.263011	0.663517	0.987448	1.00878	1.50128	0.671951
4022	ST4022	chrIV	-	60541	61893	ORF-T	YDL222C	FMP45	106	85	4925	635	99.5493	5244.14	1353	-2.39348	0.0913113	2.08721	8.06238	0.0735767	3.87593	0.018983	0.0113256	0.805779	0.480743	1.67611
4021	ST4021	chrIV	-	57149	60469	ORF-T	YDL223C	HBT1	314	427	1924	174	294.891	2048.67	3321	-1.92257	0.146231	2.01142	7.47393	0.0887959	0.616885	0.143943	0.0195654	0.607232	0.0825382	7.35698
4020	ST4020	chrIV	-	54181	56725	ORF-T	YDL224C	WHI4	1501	46	1370	70	1409.66	1458.77	2545	-0.32051	0.725779	0.172758	1.18858	0.553892	0.573192	0.966328	0.610627	0.76317	0.48225	1.58252
4019	ST4019	chrIV	-	50925	52197	ORF-T	YDL226C	GCS1	1992	71	1033	40	1870.78	1099.94	1273	1.53242	4.62934	1.098	2.99816	1.46958	0.864051	1.7008	1.54406	0.317449	0.288194	1.10151
4018	ST4018	chrIV	-	38797	42365	ORF-T	YDL231C	BRE4	1595	285	1022	358	1497.94	1088.22	3569	-0.327732	0.720556	-0.0219986	0.978242	0.419707	0.30491	1.37649	0.736583	0.582477	0.311692	1.86876
4017	ST4017	chrIV	-	34141	36597	ORF-T	YDL234C	GYP7	747	228	1272	31	701.541	1354.42	2457	1.39588	4.03854	1.44547	4.24385	0.285527	0.551251	0.517962	0.951621	0.0707007	0.129894	0.544294
4016	ST4016	chrIV	-	33301	34037	ORF-T	YDL235C	YPD1	989	328	576	159	928.814	613.324	737	1.15414	3.17129	0.883773	2.42001	1.26026	0.83219	1.51439	1.31044	0.397397	0.343878	1.15563
4014	ST4014	chrIV	-	28957	30485	ORF-T	YDL238C	GUD1	489	10	1172	24	459.242	1247.94	1529	-1.08762	0.337019	-0.419614	0.6573	0.300354	0.816184	0.367998	0.512732	0.891209	1.24172	0.717721
4013	ST4013	chrIV	-	26277	28957	ORF-T	YDL239C	ADY3	164	34	366	33	154.02	389.716	2681	-1.38315	0.250787	-0.881944	0.413977	0.0574486	0.145362	0.395209	0.605799	0.229073	0.351136	0.652377
4156	ST4156	chrIV	-	450149	452725	ORF-T	YDR001C	NTH1	718	113	2668	70	674.306	2840.88	2577	0.802562	2.23125	1.4224	4.14707	0.261663	1.1024	0.237358	0.538031	0.117272	0.265826	0.44116
4157	ST4157	chrIV	-	456677	458237	ORF-T	YDR005C	MAF1	906	88	932	69	850.865	992.393	1561	1.18751	3.27891	1.37052	3.93738	0.545077	0.635742	0.857387	0.832763	0.166237	0.161463	1.02957
4158	ST4158	chrIV	-	458525	461389	ORF-T	YDR006C	SOK1	1757	16	1700	34	1650.08	1810.16	2865	0.261764	1.29922	1.20167	3.32567	0.575943	0.631818	0.911565	0.390665	0.443299	0.189982	2.33337
4159	ST4159	chrIV	-	461445	462357	other	YDR008C	YDR008C	284	647	684	1205	266.717	728.323	913	-2.62243	0.0726259	-1.59927	0.202043	0.292132	0.797725	0.366207	0.359457	4.02243	3.94829	1.01878
4160	ST4160	chrIV	-	462533	463149	other	YDR008C	YDR008C	23	94	713	202	21.6003	759.202	617	-3.98124	0.0186625	-1.2253	0.293671	0.0350086	1.23047	0.0284514	0.0635489	1.87588	4.18997	0.447708
4163	ST4163	chrIV	-	478358	478790	ORF-T	YDR016C	DAD1	590	6	877	54	554.095	933.829	433	1.75723	5.79637	1.52454	4.59303	1.27967	2.15665	0.593358	1.26199	0.22077	0.469548	0.470176
4164	ST4164	chrIV	-	478966	482382	ORF-T	YDR017C	KCS1	1848	61	1321	87	1735.54	1406.6	3417	0.330663	1.39189	0.455739	1.57734	0.507913	0.411648	1.23385	0.88243	0.364909	0.260976	1.39825
4165	ST4165	chrIV	-	482494	483870	ORF-T	YDR018C	YDR018C	86	468	801	205	80.7664	852.904	1377	-3.75963	0.0232923	-0.100435	0.904444	0.0586539	0.619393	0.0946958	0.0257532	2.51817	0.684833	3.67705
4166	ST4166	chrIV	-	484182	486566	other	YDR019C, YDR020C	GCV1, YDR020C	2374	322	1533	260	2229.53	1632.34	2385	0.26192	1.29942	0.473718	1.60595	0.934813	0.684418	1.36585	0.809128	0.719406	0.426175	1.68805
4167	ST4167	chrIV	-	488046	488758	ORF-T	YDR022C	CIS1	362	67	438	10	339.97	466.382	713	-1.20098	0.300899	0.155046	1.16771	0.476817	0.654112	0.728952	0.257683	1.58464	0.560166	2.82888
4169	ST4169	chrIV	-	492470	494414	ORF-T	YDR026C	YDR026C	992	496	538	143	931.631	572.862	1945	-0.626568	0.534423	-0.612724	0.541873	0.478988	0.294531	1.62628	0.986251	0.896271	0.543542	1.64895
4170	ST4170	chrIV	-	494654	497438	ORF-T	YDR027C	VPS54	1156	96	1207	17	1085.65	1285.21	2785	-0.00894254	0.991097	-0.0335439	0.967012	0.389821	0.461477	0.844725	1.02491	0.393322	0.477219	0.824197
4171	ST4171	chrIV	-	497550	501390	ORF-T	YDR028C	REG1	1893	33	2503	42	1777.8	2665.19	3841	0.836539	2.30836	1.05122	2.86113	0.462848	0.69388	0.667044	0.8068	0.200509	0.242519	0.826777
4172	ST4172	chrIV	-	501662	503302	ORF-T	YDR030C	RAD28	328	376	388	497	308.039	413.142	1641	-1.81791	0.162364	-0.693323	0.499912	0.187714	0.251762	0.745601	0.324785	1.15613	0.503613	2.29568
4173	ST4173	chrIV	-	503943	504823	ORF-T	YDR032C	PST2	687	100	4549	263	645.192	4843.77	881	1.7844	5.95602	2.7919	16.3119	0.732341	5.49804	0.1332	0.365133	0.122958	0.337057	0.364799
4176	ST4176	chrIV	-	509671	512255	ORF-T	YDR034C	LYS14	1261	230	1074	133	1184.26	1143.59	2585	-0.09551	0.908909	0.36742	1.444	0.458128	0.442396	1.03556	0.629437	0.504042	0.306368	1.64522
4177	ST4177	chrIV	-	523135	524783	ORF-T	YDR036C	EHD3	512	154	627	141	480.842	667.629	1649	-0.508054	0.601665	0.234335	1.26407	0.291596	0.404869	0.720223	0.475975	0.484648	0.320291	1.51315
4178	ST4178	chrIV	-	540599	541615	other	YDR042C, snR47	YDR042C, SNR47	10650	73	20569	150	10001.9	21901.9	1017	-2.24877	0.105529	-3.66757	0.0255385	9.8347	21.5357	0.456668	4.13214	93.1945	843.265	0.110516
4180	ST4180	chrIV	-	542631	543567	ORF-T	YDR043C	NRG1	329	724	710	162	308.978	756.007	937	-0.565293	0.568194	0.35453	1.42551	0.329753	0.806838	0.408698	0.39859	0.580353	0.566	1.02536
4183	ST4183	chrIV	-	547799	548455	ORF-T	YDR045C	RPC11	988	36	399	25	927.875	424.855	657	1.46541	4.32933	0.779931	2.18132	1.41229	0.646659	2.18398	1.98473	0.326214	0.296453	1.10039
4184	ST4184	chrIV	-	548687	550687	ORF-T	YDR046C	BAP3	3584	210	2931	394	3365.89	3120.93	2001	1.74804	5.74334	0.954379	2.59706	1.68211	1.55968	1.07849	2.21148	0.292879	0.600558	0.487679
4186	ST4186	chrIV	-	555647	556511	ORF-T	YDR050C	TPI1	20890	115	9607	45	19618.7	10229.5	865	2.87154	17.6641	2.66461	14.3623	22.6806	11.826	1.91785	1.22989	1.28399	0.823407	1.55937
4188	ST4188	chrIV	-	557047	558103	ORF-T	YDR051C	YDR051C	885	230	713	122	831.143	759.202	1057	1.1158	3.05202	1.41393	4.11208	0.786322	0.718261	1.09476	0.742209	0.25764	0.174671	1.475
4189	ST4189	chrIV	-	558351	560775	ORF-T	YDR052C	DBF4	1329	24	824	23	1248.12	877.395	2425	-0.302185	0.739201	-0.248455	0.780005	0.51469	0.361812	1.42253	0.947688	0.696278	0.463859	1.50106
4190	ST4190	chrIV	-	561087	562511	ORF-T	YDR054C	CDC34	1855	38	2125	26	1742.11	2262.7	1425	1.42275	4.14853	1.77064	5.87464	1.22254	1.58786	0.769927	0.706176	0.294691	0.27029	1.09028
4192	ST4192	chrIV	-	565039	565719	ORF-T	YDR056C	YDR056C	1211	46	901	61	1137.3	959.384	681	1.2964	3.65611	1.49429	4.45618	1.67005	1.40879	1.18545	0.820459	0.456783	0.316142	1.44486
4193	ST4193	chrIV	-	567599	568735	ORF-T	YDR058C	TGL2	124	75	440	75	116.454	468.512	1137	-0.398649	0.671226	0.407224	1.50264	0.102422	0.412059	0.248561	0.446698	0.152589	0.274224	0.556442
4194	ST4194	chrIV	-	569151	569831	ORF-T	YDR059C	UBC5	220	137	681	325	206.612	725.128	681	-0.48249	0.617245	1.6813	5.37252	0.303395	1.0648	0.284931	0.114889	0.491531	0.198194	2.48005
4197	ST4197	chrIV	-	581799	582663	ORF-T	YDR066C	YDR066C	362	191	424	144	339.97	451.475	865	-1.57534	0.206937	-0.182187	0.833445	0.393029	0.521936	0.753021	0.248291	1.89927	0.626239	3.03281
4198	ST4198	chrIV	-	582663	583527	ORF-T	YDR067C	OCA6	685	104	629	43	643.314	669.759	865	0.663582	1.94173	0.592689	1.80885	0.743715	0.774287	0.960516	1.07347	0.383016	0.428056	0.89478
4199	ST4199	chrIV	-	584711	587775	ORF-T	YDR069C	DOA4	759	114	1135	113	712.81	1208.55	3065	-0.766392	0.464687	-0.723285	0.485156	0.232565	0.394306	0.589808	0.95781	0.500476	0.812741	0.615788
4200	ST4200	chrIV	-	588039	588447	ORF-T	YDR070C	FMP16	46	371	2953	246	43.2006	3144.35	409	-1.34085	0.261624	2.65938	14.2875	0.105625	7.6879	0.0137391	0.0183114	0.403728	0.538087	0.750303
4201	ST4201	chrIV	-	588815	589535	ORF-T	YDR071C	PAA1	1383	2	1268	50	1298.84	1350.17	721	2.27351	9.71347	2.11613	8.29895	1.80144	1.87263	0.961983	1.17045	0.185458	0.225646	0.821895
4202	ST4202	chrIV	-	589759	591535	ORF-T	YDR072C	IPT1	2986	286	2787	195	2804.28	2967.6	1777	1.11885	3.06132	0.946909	2.57773	1.5781	1.67	0.944969	1.1876	0.515496	0.647858	0.795694
4206	ST4206	chrIV	-	602055	602935	ORF-T	YDR078C	SHU2	727	545	747	2201	682.758	795.405	881	-0.219801	0.802678	-0.917234	0.399623	0.774981	0.902843	0.858378	2.00859	0.965493	2.25924	0.427353
4208	ST4208	chrIV	-	603423	603863	ORF-T	YDR079C-A	TFB5	418	201	432	469	392.562	459.993	441	0.591602	1.80688	1.03329	2.81029	0.890164	1.04307	0.853409	0.642951	0.492652	0.37116	1.32733
4209	ST4209	chrIV	-	607119	610167	ORF-T	YDR081C	PDC2	1160	45	735	71	1089.41	782.627	3049	-0.193512	0.82406	-0.268881	0.764234	0.3573	0.256683	1.39199	1.07828	0.433585	0.33587	1.29093
4210	ST4210	chrIV	-	613175	614072	ORF-T	YDR084C	TVP23	527	255	691	53	494.929	735.776	898	1.06021	2.88697	0.835122	2.3051	0.551146	0.81935	0.672662	1.25243	0.190908	0.355452	0.537087
4211	ST4211	chrIV	-	614232	616336	ORF-T	YDR085C	AFR1	286	478	2055	135	268.595	2188.16	2105	-1.00609	0.365647	0.350956	1.42043	0.127599	1.03951	0.122749	0.257421	0.348967	0.731828	0.476843
4212	ST4212	chrIV	-	616736	617272	ORF-T	YDR086C	SSS1	2024	119	1321	832	1900.83	1406.6	537	2.3554	10.5423	1.62784	5.09286	3.53972	2.61937	1.35136	2.07002	0.335763	0.514322	0.652828
4213	ST4213	chrIV	-	617432	618336	ORF-T	YDR087C	RRP1	1341	121	163	103	1259.39	173.562	905	1.38895	4.01063	0.046777	1.04789	1.39159	0.191782	7.25614	3.82735	0.346976	0.183017	1.89587
4214	ST4214	chrIV	-	618336	619984	other	YDR088C, tR(ACG)D	SLU7, tR(ACG)D	920	55	636	24	864.013	677.212	1649	0.0223657	1.02262	0.304752	1.35629	0.523962	0.410681	1.27584	0.753982	0.512373	0.302797	1.69213
4217	ST4217	chrIV	-	624736	626112	ORF-T	YDR090C	YDR090C	754	80	906	46	708.115	964.708	1377	0.418241	1.51929	0.521035	1.68377	0.514245	0.700587	0.73402	0.902313	0.338478	0.416082	0.813487
4218	ST4218	chrIV	-	626368	628600	ORF-T	YDR091C	RLI1	2866	24	835	140	2691.59	889.107	2233	1.75556	5.78666	0.294432	1.34236	1.20537	0.398167	3.02729	4.3108	0.208301	0.296616	0.702258
4220	ST4220	chrIV	-	640168	643912	ORF-T	YDR097C	MSH6	766	34	479	55	719.384	510.039	3745	-0.686753	0.503207	-0.920739	0.398224	0.192092	0.136192	1.41045	1.26363	0.381735	0.341998	1.11619
4221	ST4221	chrIV	-	644144	644984	ORF-T	YDR098C	GRX3	813	84	440	103	763.524	468.512	841	1.66941	5.30903	0.958453	2.60766	0.907877	0.557089	1.62968	2.03594	0.171006	0.213635	0.800458
4223	ST4223	chrIV	-	655600	657512	ORF-T	YDR101C	ARX1	2611	48	226	211	2452.11	240.645	1913	0.813288	2.25531	-0.235942	0.789826	1.28181	0.125794	10.1897	2.85545	0.568352	0.159268	3.56852
4224	ST4224	chrIV	-	661080	664968	ORF-T	YDR104C	SPO71	441	74	476	93	414.163	506.844	3889	-1.48181	0.227225	-0.305843	0.736502	0.106496	0.130328	0.81714	0.308519	0.468681	0.176955	2.64859
4225	ST4225	chrIV	-	665264	666832	ORF-T	YDR105C	TMS1	930	16	1311	19	873.404	1395.95	1569	0.333729	1.39616	0.268773	1.30836	0.556663	0.889708	0.625669	1.06711	0.398709	0.680019	0.58632
4226	ST4226	chrIV	-	668816	671040	ORF-T	YDR107C	TMN2	542	162	690	60	509.016	734.711	2225	-0.802254	0.448317	-0.742531	0.475908	0.228771	0.330207	0.692811	0.942026	0.510289	0.693847	0.735448
4227	ST4227	chrIV	-	673520	675856	ORF-T	YDR109C	YDR109C	702	28	662	36	659.279	704.897	2337	-1.0564	0.347705	-0.499016	0.607128	0.282105	0.301625	0.935284	0.572705	0.811334	0.496806	1.6331
4228	ST4228	chrIV	-	677984	680000	ORF-T	YDR111C	ALT2	607	214	2113	62	570.061	2249.92	2017	0.368333	1.44532	1.40773	4.08668	0.282628	1.11548	0.253369	0.353667	0.195546	0.272955	0.716405
4229	ST4229	chrIV	-	680472	681728	ORF-T	YDR113C	PDS1	513	236	546	1075	481.781	581.38	1257	-0.900269	0.40646	-0.77811	0.459273	0.383278	0.462514	0.828685	0.885008	0.942966	1.00706	0.936359
4230	ST4230	chrIV	-	682624	683624	ORF-T	YDR116C	MRPL1	1044	97	1066	130	980.467	1135.08	1001	0.60469	1.83069	0.684813	1.9834	0.979487	1.13394	0.863789	0.923003	0.535039	0.571716	0.935847
4231	ST4231	chrIV	-	683896	685688	ORF-T	YDR117C	TMA64	622	73	481	43	584.148	512.168	1793	-0.082148	0.921136	-0.503554	0.604379	0.325793	0.285649	1.14054	1.5241	0.353687	0.472632	0.748334
4234	ST4234	chrIV	-	691360	693240	ORF-T	YDR120C	TRM1	1640	10	337	1320	1540.2	358.837	1881	0.311913	1.36604	-0.10978	0.896032	0.818818	0.190769	4.29219	1.52454	0.599412	0.212905	2.8154
4235	ST4235	chrIV	-	698016	699552	ORF-T	YDR123C	INO2	521	72	206	180	489.294	219.349	1537	-0.918427	0.399146	-0.70828	0.492491	0.318344	0.142712	2.23067	0.810465	0.797561	0.289776	2.75233
4236	ST4236	chrIV	-	700256	702736	ORF-T	YDR125C	ECM18	295	287	657	196	277.048	699.573	2481	-1.59493	0.202923	-0.510555	0.600162	0.111668	0.281972	0.396024	0.338113	0.550297	0.469827	1.17128
4239	ST4239	chrIV	-	713200	715400	ORF-T	YDR129C	SAC6	2580	39	3594	55	2422.99	3826.89	2201	1.89987	6.68504	1.84084	6.30185	1.10086	1.7387	0.633149	1.06081	0.164675	0.275904	0.596857
4240	ST4240	chrIV	-	715456	716640	ORF-T	YDR130C	FIN1	722	103	924	85	678.062	983.874	1185	-0.432684	0.648766	-0.48533	0.615494	0.572204	0.830274	0.689175	1.05406	0.881989	1.34895	0.653832
4241	ST4241	chrIV	-	716768	718552	ORF-T	YDR131C	YDR131C	431	69	451	16	404.771	480.224	1785	-0.984113	0.373771	-0.267397	0.765369	0.226763	0.269033	0.842879	0.488353	0.606689	0.351508	1.72596
4242	ST4242	chrIV	-	718832	720416	ORF-T	YDR132C	YDR132C	426	156	512	142	400.075	545.177	1585	-0.900579	0.406334	-0.46265	0.629613	0.252414	0.34396	0.733845	0.645372	0.621197	0.546305	1.13709
4243	ST4243	chrIV	-	720768	721568	other	YDR133C, YDR134C	YDR133C, YDR134C	1972	54	5155	47	1851.99	5489.04	801	2.03729	7.66983	2.15293	8.61008	2.3121	6.85273	0.337398	0.890797	0.301454	0.795897	0.37876
4244	ST4244	chrIV	-	722912	727616	ORF-T	YDR135C	YCF1	2917	65	1752	985	2739.48	1865.53	4705	0.506262	1.65908	0.19825	1.21927	0.582249	0.396499	1.46848	1.36072	0.350948	0.325195	1.07919
4245	ST4245	chrIV	-	733448	733968	ORF-T	YDR139C	RUB1	551	96	510	118	517.468	543.048	521	1.91408	6.78069	1.90452	6.71618	0.993222	1.04232	0.952897	1.0096	0.146478	0.155195	0.943832
4246	ST4246	chrIV	-	734720	740040	ORF-T	YDR141C	DOP1	1651	182	1486	136	1550.53	1582.29	5321	-0.599749	0.54895	-0.788481	0.454535	0.291398	0.297367	0.979925	1.20772	0.530828	0.654223	0.811386
4247	ST4247	chrIV	-	740464	741776	ORF-T	YDR142C	PEX7	733	8	910	16	688.393	968.967	1313	-0.328453	0.720037	0.431383	1.53939	0.52429	0.73798	0.71044	0.467743	0.728143	0.479399	1.51887
4248	ST4248	chrIV	-	742040	744032	ORF-T	YDR143C	SAN1	1613	106	1015	321	1514.84	1080.77	1993	-0.127067	0.880675	-0.200718	0.818143	0.76008	0.542284	1.40163	1.07643	0.863066	0.662822	1.30211
4249	ST4249	chrIV	-	744224	746240	ORF-T	YDR144C	MKC7	1305	216	390	301	1225.58	415.272	2017	0.955127	2.599	-1.85928	0.155785	0.607627	0.205886	2.95128	16.6832	0.233792	1.3216	0.176901
4250	ST4250	chrIV	-	748584	750912	ORF-T	YDR146C	SWI5	906	39	1193	47	850.865	1270.31	2329	-0.126645	0.881046	0.25408	1.28928	0.365335	0.54543	0.669811	0.683366	0.41466	0.423051	0.980165
4252	ST4252	chrIV	-	753512	755320	ORF-T	YDR148C	KGD2	921	40	5299	37	864.952	5642.37	1809	0.660978	1.93669	2.13716	8.47536	0.478138	3.11906	0.153296	0.228508	0.246885	0.368015	0.670856
4253	ST4253	chrIV	-	763960	765328	ORF-T	YDR151C	CTH1	1687	185	1317	286	1584.34	1402.34	1369	0.624332	1.867	0.433242	1.54225	1.15729	1.02435	1.12978	1.21057	0.619869	0.664195	0.933264
4254	ST4254	chrIV	-	766696	768104	ORF-T	YDR153C	ENT5	1122	53	764	38	1053.72	813.507	1409	0.264767	1.30313	0.574231	1.77576	0.747849	0.577364	1.29528	0.73384	0.573888	0.325136	1.76507
4256	ST4256	chrIV	-	768400	769064	ORF-T	YDR154C, YDR155C	YDR154C, CPR1	7417	34	5783	28	6965.63	6157.73	665	2.64813	14.1276	2.65494	14.2242	10.4746	9.25975	1.1312	0.99321	0.741431	0.650986	1.13893
4258	ST4258	chrIV	-	780304	781232	ORF-T	YDR162C	NBP2	441	146	452	41	414.163	481.289	929	0.726134	2.06707	1.06674	2.90591	0.445816	0.518072	0.860527	0.711336	0.215675	0.178283	1.20973
4260	ST4260	chrIV	-	781880	784264	ORF-T	YDR164C	SEC1	863	89	721	110	810.481	767.72	2385	-0.226827	0.797058	-0.0702502	0.932161	0.339825	0.321895	1.0557	0.855065	0.426348	0.345322	1.23464
4263	ST4263	chrIV	-	786288	789280	ORF-T	YDR166C	SEC5	932	125	855	75	875.282	910.403	2993	-0.353486	0.702236	-0.103173	0.901971	0.292443	0.304178	0.961423	0.778557	0.416446	0.337236	1.23488
4264	ST4264	chrIV	-	792040	794256	ORF-T	YDR169C	STB3	788	31	1075	59	740.046	1144.66	2217	0.196776	1.21747	0.957934	2.60631	0.333805	0.51631	0.646521	0.467125	0.274179	0.1981	1.38404
4265	ST4265	chrIV	-	796072	802432	ORF-T	YDR170C	SEC7	3219	22	2273	65	3023.11	2420.29	6361	0.632506	1.88232	0.101654	1.107	0.475256	0.380489	1.24907	1.70038	0.252484	0.343711	0.734581
4266	ST4266	chrIV	-	810504	811672	ORF-T	YDR173C	ARG82	1133	227	1864	131	1064.05	1984.79	1169	-0.452749	0.635878	-0.0522723	0.94907	0.910223	1.69785	0.536103	0.670001	1.43144	1.78896	0.800154
4267	ST4267	chrIV	-	813016	814200	ORF-T	YDR175C	RSM24	1020	351	972	254	957.927	1034.98	1185	0.148312	1.15988	0.560639	1.75179	0.808377	0.873405	0.925547	0.662108	0.696952	0.498578	1.39788
4268	ST4268	chrIV	-	818592	819224	ORF-T	YDR179C	CSN9	178	53	136	666	167.168	144.813	633	-0.709251	0.492012	0.507213	1.66066	0.264088	0.228772	1.15437	0.296276	0.536751	0.13776	3.89627
4269	ST4269	chrIV	-	825953	827401	ORF-T	YDR181C	SAS4	537	8	474	19	504.32	504.715	1449	-0.443831	0.641574	0.294197	1.34205	0.348047	0.348319	0.999219	0.478056	0.54249	0.259543	2.09017
4270	ST4270	chrIV	-	830417	831561	ORF-T	YDR183C-A, YDR184C	YDR183C-A, ATC1	1464	25	145	46	1374.91	154.396	1145	0.533068	1.70415	-0.399819	0.670442	1.20079	0.134844	8.90508	2.54184	0.704627	0.201126	3.5034
4272	ST4272	chrIV	-	831921	832577	ORF-T	YDR185C	YDR185C	473	363	704	49	444.215	749.619	657	-0.190281	0.826726	-1.72702	0.177813	0.676127	1.14097	0.592588	4.64941	0.817836	6.41668	0.127455
4273	ST4273	chrIV	-	832745	835585	ORF-T	YDR186C	YDR186C	1806	125	1531	183	1696.09	1630.21	2841	-0.252383	0.776947	1.11369	3.04558	0.597006	0.573815	1.04042	0.255106	0.7684	0.188409	4.07836
4274	ST4274	chrIV	-	840473	842057	ORF-T	YDR190C	RVB1	2719	60	1698	57	2553.53	1808.03	1585	1.55617	4.74065	0.96585	2.62702	1.61106	1.14071	1.41233	1.80457	0.33984	0.434223	0.782639
4275	ST4275	chrIV	-	843593	844929	ORF-T	YDR192C	NUP42	647	49	420	93	607.626	447.216	1337	-0.478325	0.619821	-0.186826	0.829588	0.45447	0.334492	1.35869	0.747143	0.733228	0.403202	1.81851
4276	ST4276	chrIV	-	845873	847977	ORF-T	YDR194C	MSS116	2566	7	1580	20	2409.84	1682.38	2105	1.30626	3.69234	0.759477	2.13716	1.14482	0.799232	1.4324	1.72769	0.310053	0.373969	0.829086
4277	ST4277	chrIV	-	850273	851041	ORF-T	YDR196C	YDR196C	480	41	1044	78	450.789	1111.65	769	1.11052	3.03594	1.61003	5.00296	0.586202	1.44558	0.405514	0.606828	0.193088	0.288945	0.668251
4278	ST4278	chrIV	-	852441	854009	ORF-T	YDR198C	RKM2	667	51	274	100	626.409	291.755	1569	-0.455976	0.633829	-0.372085	0.689296	0.399241	0.18595	2.14704	0.919531	0.629888	0.269768	2.33493
4279	ST4279	chrIV	-	854193	856169	ORF-T	YDR200C	VPS64	535	638	704	685	502.442	749.619	1977	-0.140717	0.868735	0.042126	1.04303	0.254144	0.37917	0.670264	0.832899	0.292545	0.363529	0.804736
4280	ST4280	chrIV	-	856897	857985	ORF-T	YDR202C	RAV2	403	55	1025	76	378.475	1091.42	1089	0.302541	1.35329	1.15684	3.17987	0.347544	1.00222	0.346773	0.425582	0.256813	0.315177	0.814822
4281	ST4281	chrIV	-	864921	867721	ORF-T	YDR207C	UME6	565	126	289	69	530.616	307.727	2801	-0.0913393	0.912708	-0.631717	0.531678	0.189438	0.109863	1.72431	1.71666	0.207556	0.206635	1.00446
4283	ST4283	chrIV	-	899505	903537	ORF-T	YDR217C	RAD9	990	22	543	99	929.753	578.186	4033	-1.19877	0.301565	-1.37742	0.252229	0.230536	0.143364	1.60805	1.1956	0.764465	0.568387	1.34497
4284	ST4284	chrIV	-	905329	907081	other	YDR219C, YDR220C	MFB1, YDR220C	768	5	987	11	721.263	1050.96	1753	0.0233647	1.02364	0.260697	1.29783	0.411445	0.599519	0.686292	0.788729	0.401943	0.461938	0.870123
4287	ST4287	chrIV	-	914201	914833	ORF-T	YDR224C	HTB1	4960	23	3809	32	4658.16	4055.82	633	2.34529	10.4363	2.57809	13.1719	7.35886	6.4073	1.14851	0.792318	0.705118	0.486437	1.44956
4289	ST4289	chrIV	-	921921	923897	ORF-T	YDR228C	PCF11	1323	18	1086	25	1242.49	1156.37	1977	0.24597	1.27886	-0.268762	0.764325	0.628471	0.584912	1.07447	1.67319	0.49143	0.765266	0.642169
4291	ST4291	chrIV	-	926233	926945	ORF-T	YDR231C	COX20	299	111	2567	161	280.804	2733.34	713	0.0479565	1.04913	1.69636	5.45405	0.393835	3.83358	0.102733	0.192357	0.375393	0.702886	0.534074
4293	ST4293	chrIV	-	929345	930417	ORF-T	YDR233C	RTN1	5103	148	2517	226	4792.45	2680.1	1073	2.20712	9.0895	2.17638	8.8143	4.46641	2.49776	1.78816	1.03122	0.491381	0.283376	1.73402
4294	ST4294	chrIV	-	935201	935921	ORF-T	YDR236C	FMN1	427	118	602	73	401.015	641.009	721	0.270638	1.3108	0.0825552	1.08606	0.556192	0.889056	0.625599	1.20693	0.424315	0.818607	0.518338
4295	ST4295	chrIV	-	937641	940857	ORF-T	YDR238C	SEC26	3623	81	2544	78	3402.52	2708.85	3217	1.34953	3.8556	0.99501	2.70475	1.05767	0.842042	1.25608	1.42549	0.27432	0.31132	0.881154
4296	ST4296	chrIV	-	940977	943465	ORF-T	YDR239C	YDR239C	859	45	483	48	806.725	514.298	2489	-1.39883	0.246886	-0.622706	0.536491	0.324116	0.206628	1.56859	0.460188	1.31281	0.385148	3.4086
4297	ST4297	chrIV	-	943657	945185	ORF-T	YDR240C	SNU56	608	119	344	72	571	366.291	1529	-0.852315	0.426427	-0.959109	0.383234	0.373446	0.239562	1.55887	1.11271	0.875758	0.625107	1.40097
4298	ST4298	chrIV	-	946849	950329	ORF-T	YDR243C	PRP28	834	363	581	426	783.246	618.648	3481	-1.26834	0.281299	-1.59955	0.201987	0.225006	0.177721	1.26606	1.39266	0.799881	0.879865	0.909095
4299	ST4299	chrIV	-	957521	958433	ORF-T	YDR248C	YDR248C	225	79	452	517	211.307	481.289	913	0.475592	1.60897	0.893387	2.44339	0.231443	0.527151	0.439045	0.658497	0.143846	0.215746	0.666737
4300	ST4300	chrIV	-	958561	960121	other	YDR249C, YDR250C	YDR249C, YDR250C	1213	13	432	155	1139.18	459.993	1561	-0.44203	0.64273	-1.49551	0.224135	0.729777	0.294679	2.47652	2.86761	1.13543	1.31474	0.863618
4301	ST4301	chrIV	-	964017	964801	ORF-T	YDR253C	MET32	111	104	123	129	104.245	130.97	785	-2.79357	0.0612023	-3.177	0.0417106	0.132796	0.166841	0.795944	1.46731	2.16979	3.99997	0.542452
4302	ST4302	chrIV	-	966337	967865	ORF-T	YDR255C	RMD5	424	104	1207	149	398.197	1285.21	1529	-1.28865	0.275644	0.409494	1.50606	0.26043	0.840558	0.30983	0.183024	0.944806	0.558118	1.69284
4303	ST4303	chrIV	-	967985	969673	ORF-T	YDR256C	CTA1	120	1056	1797	411	112.697	1913.44	1689	-2.85009	0.0578389	2.031	7.62167	0.0667243	1.13289	0.0588976	0.00758874	1.15362	0.14864	7.76119
4304	ST4304	chrIV	-	969745	971489	ORF-T	YDR257C	SET7	1101	62	455	26	1034	484.484	1745	0.521955	1.68532	-0.618782	0.5386	0.592549	0.277641	2.13423	3.12907	0.351595	0.515487	0.682064
4305	ST4305	chrIV	-	971769	974305	ORF-T	YDR258C	HSP78	741	41	3434	22	695.906	3656.52	2537	1.17708	3.24488	1.50908	4.52255	0.274303	1.44128	0.190319	0.717489	0.0845341	0.318687	0.265257
4306	ST4306	chrIV	-	974625	975993	ORF-T	YDR259C	YAP6	60	242	444	57	56.3487	472.771	1369	-1.56947	0.208155	-0.590626	0.55398	0.0411604	0.34534	0.119188	0.375744	0.19774	0.62338	0.317206
4307	ST4307	chrIV	-	976313	977273	ORF-T	YDR260C	SWM1	935	252	570	513	878.1	606.936	961	0.120306	1.12784	0.320746	1.37816	0.913736	0.631567	1.44678	0.81837	0.810163	0.458269	1.76787
4308	ST4308	chrIV	-	977417	979281	ORF-T	YDR261C	EXG2	1042	219	593	384	978.588	631.426	1865	0.670973	1.95614	-0.951675	0.386094	0.524712	0.338566	1.54981	5.06649	0.268239	0.876901	0.305894
4310	ST4310	chrIV	-	994057	995769	ORF-T	YDR263C	DIN7	155	181	266	403	145.567	283.237	1713	-2.21849	0.108774	-2.16749	0.114465	0.084978	0.165345	0.513943	0.950281	0.781237	1.44451	0.540832
4311	ST4311	chrIV	-	995769	998441	ORF-T	YDR264C	AKR1	2261	23	2480	41	2123.41	2640.7	2673	0.691134	1.99598	0.988145	2.68625	0.79439	0.987917	0.804106	0.743036	0.397996	0.367769	1.08219
4312	ST4312	chrIV	-	999993	1002233	ORF-T	YDR266C	YDR266C	1178	57	622	126	1106.31	662.305	2241	0.6256	1.86937	-0.332769	0.716936	0.493669	0.29554	1.6704	2.60744	0.264084	0.412227	0.640627
4313	ST4313	chrIV	-	1002345	1003553	ORF-T	YDR267C	CIA1	730	10	371	25	685.575	395.04	1209	0.692121	1.99795	0.233398	1.26288	0.56706	0.32675	1.73546	1.58205	0.283821	0.258733	1.09696
4316	ST4316	chrIV	-	1013049	1013745	ORF-T	YDR276C	PMP3	3644	249	6916	248	3422.24	7364.15	697	2.92989	18.7255	2.94002	18.9163	4.90996	10.5655	0.464716	0.989915	0.262207	0.558539	0.469451
4317	ST4317	chrIV	-	1014193	1015881	ORF-T	YDR277C	MTH1	119	247	3351	89	111.758	3568.14	1689	-1.34586	0.260315	1.93037	6.89208	0.0661682	2.11258	0.0313211	0.0377702	0.254185	0.306522	0.829254
4320	ST4320	chrIV	-	1021737	1022425	ORF-T	YDR281C	PHM6	899	371	91	133	844.291	96.8967	689	0.677962	1.96986	-0.0273094	0.97306	1.22539	0.140634	8.7133	2.0244	0.622068	0.144527	4.30415
4321	ST4321	chrIV	-	1023481	1024761	ORF-T	YDR282C	YDR282C	321	8	519	12	301.465	552.631	1281	-0.0105829	0.989473	0.82528	2.28252	0.235336	0.431406	0.545509	0.4335	0.23784	0.189004	1.25838
4322	ST4322	chrIV	-	1024945	1030281	ORF-T	YDR283C	GCN2	1328	68	1247	107	1247.18	1327.8	5337	-0.775527	0.460461	-0.813446	0.443328	0.233686	0.248792	0.939282	1.03865	0.507505	0.561193	0.904332
4323	ST4323	chrIV	-	1030481	1031729	ORF-T	YDR284C	DPP1	739	410	855	317	694.028	910.403	1249	1.25995	3.52523	1.31254	3.7156	0.555667	0.728906	0.76233	0.948766	0.157626	0.196175	0.803496
4325	ST4325	chrIV	-	1035153	1035585	ORF-T	YDR286C	YDR286C	189	28	312	37	177.498	332.217	433	-0.224628	0.798813	0.467523	1.59604	0.409927	0.767246	0.534284	0.500498	0.51317	0.48072	1.0675
4327	ST4327	chrIV	-	1038121	1039609	ORF-T	YDR289C	RTT103	669	83	529	109	628.287	563.279	1489	0.524698	1.68995	0.829073	2.29119	0.421953	0.378293	1.11541	0.737584	0.249684	0.165107	1.51225
4328	ST4328	chrIV	-	1043001	1045161	ORF-T	YDR292C	SRP101	1397	42	722	45	1311.98	768.785	2161	1.28987	3.6323	0.685973	1.9857	0.607119	0.355754	1.70657	1.82923	0.167144	0.179158	0.932946
4329	ST4329	chrIV	-	1045401	1050241	ORF-T	YDR293C	SSD1	3459	273	3779	97	3248.5	4023.88	4841	1.03307	2.80967	1.1061	3.02256	0.671039	0.831208	0.807306	0.929567	0.238832	0.275001	0.868476
4330	ST4330	chrIV	-	1050425	1052289	ORF-T	YDR294C	DPL1	1522	47	2072	35	1429.38	2206.26	1865	0.652869	1.92104	1.06048	2.88777	0.766422	1.18298	0.647872	0.665234	0.398961	0.409653	0.973901
4331	ST4331	chrIV	-	1052553	1054905	ORF-T	YDR295C	HDA2	983	44	551	47	923.179	586.704	2353	-0.903817	0.405021	-0.97268	0.378068	0.392341	0.249343	1.5735	1.07129	0.968694	0.659518	1.46879
4332	ST4332	chrIV	-	1058001	1058993	ORF-T	YDR298C	ATP5	1435	26	6304	37	1347.67	6712.49	993	1.59362	4.92152	2.34623	10.4461	1.35717	6.75981	0.200771	0.471134	0.275763	0.647114	0.426143
4333	ST4333	chrIV	-	1061425	1062865	ORF-T	YDR300C	PRO1	1517	63	370	14	1424.68	393.976	1441	0.232173	1.26134	-0.696263	0.498445	0.988676	0.273404	3.61617	2.53055	0.783831	0.548515	1.42901
4334	ST4334	chrIV	-	1068705	1071689	ORF-T	YDR303C	RSC3	1060	56	834	74	995.493	888.043	2985	0.262087	1.29964	-0.326334	0.721564	0.333498	0.297502	1.121	1.80114	0.256608	0.412301	0.622381
4335	ST4335	chrIV	-	1071849	1072601	ORF-T	YDR304C	CPR5	1154	43	1164	46	1083.77	1239.43	753	2.36268	10.6194	2.24391	9.4301	1.43927	1.64598	0.874415	1.12611	0.135533	0.174546	0.77649
4336	ST4336	chrIV	-	1072689	1073481	ORF-T	YDR305C	HNT2	478	342	543	435	448.911	578.186	793	0.893235	2.44302	0.786445	2.19558	0.566092	0.729112	0.776413	1.1127	0.231718	0.332082	0.697774
4337	ST4337	chrIV	-	1073665	1075217	ORF-T	YDR306C	YDR306C	495	24	1187	17	464.876	1263.92	1553	-0.289802	0.748412	0.97225	2.64389	0.299341	0.813855	0.367806	0.283072	0.399968	0.307825	1.29934
4339	ST4339	chrIV	-	1077889	1078497	ORF-T	YDR308C	SRB7	676	37	494	50	634.862	526.011	609	0.520306	1.68254	0.826588	2.28551	1.04247	0.863729	1.20694	0.736179	0.619578	0.377916	1.63946
4340	ST4340	chrIV	-	1078793	1080265	ORF-T	YDR309C	GIC2	1477	30	424	84	1387.12	451.475	1473	1.02974	2.80034	0.00625312	1.00627	0.941695	0.3065	3.07241	2.78288	0.336279	0.30459	1.10404
4341	ST4341	chrIV	-	1080937	1084601	ORF-T	YDR310C	SUM1	1321	471	1031	360	1240.61	1097.81	3665	-0.295517	0.744146	-0.0836457	0.919757	0.338502	0.299538	1.13008	0.809068	0.454886	0.325671	1.39677
4342	ST4342	chrIV	-	1089161	1090137	ORF-T	YDR313C	PIB1	549	57	805	32	515.59	857.163	977	0.042266	1.04317	1.1555	3.17562	0.527728	0.877342	0.601508	0.328494	0.505888	0.276274	1.83111
4343	ST4343	chrIV	-	1090137	1092553	ORF-T	YDR314C	RAD34	894	77	1387	72	839.595	1476.88	2417	-1.64449	0.193111	-0.496316	0.608769	0.347371	0.611037	0.568494	0.317215	1.79882	1.00373	1.79214
4344	ST4344	chrIV	-	1092681	1093593	ORF-T	YDR315C	IPK1	190	337	282	198	178.437	300.273	913	-0.00260272	0.997401	0.362126	1.43638	0.195441	0.328886	0.59425	0.694385	0.19595	0.228969	0.855793
4346	ST4346	chrIV	-	1104937	1105929	ORF-T	YDR319C	YDR319C	779	88	791	190	731.593	842.256	993	0.936458	2.55093	1.12941	3.09384	0.736751	0.848193	0.868611	0.824518	0.288817	0.274155	1.05348
4347	ST4347	chrIV	-	1106009	1108177	ORF-T	YDR320C	SWA2	764	428	761	156	717.506	810.312	2169	-0.809801	0.444947	-0.211313	0.80952	0.3308	0.373588	0.885469	0.549643	0.743461	0.461493	1.61099
4348	ST4348	chrIV	-	1108177	1108529	ORF-T	YDR320C-A	DAD4	667	61	645	48	626.409	686.795	353	1.33842	3.813	2.01	7.46331	1.77453	1.9456	0.912075	0.5109	0.465389	0.260688	1.78523
4349	ST4349	chrIV	-	1111801	1112329	ORF-T	YDR322C-A	TIM11	855	38	4342	44	802.968	4623.36	529	1.65047	5.20945	2.5985	13.4436	1.5179	8.73981	0.173676	0.387504	0.291374	0.650108	0.448193
4350	ST4350	chrIV	-	1112329	1114057	ORF-T	YDR323C	PEP7	374	59	443	851	351.24	471.706	1729	-1.02379	0.359232	-0.476934	0.620683	0.203146	0.27282	0.744616	0.578768	0.565502	0.439548	1.28655
4351	ST4351	chrIV	-	1114249	1116729	ORF-T	YDR324C	UTP4	2651	13	402	39	2489.67	428.049	2481	0.996849	2.70973	-0.012347	0.987729	1.0035	0.172531	5.81632	2.74339	0.37033	0.174674	2.12012
4352	ST4352	chrIV	-	1120481	1125113	ORF-T	YDR326C	YSP2	2289	33	1245	54	2149.7	1325.67	4633	0.0196477	1.01984	-0.683127	0.505036	0.463998	0.286137	1.62159	2.01935	0.45497	0.566569	0.803027
4353	ST4353	chrIV	-	1125177	1126081	ORF-T	YDR328C	SKP1	1133	52	1885	9	1064.05	2007.15	905	1.9882	7.30238	2.04353	7.7178	1.17575	2.21784	0.530131	0.946173	0.161009	0.287367	0.56029
4354	ST4354	chrIV	-	1126241	1127625	ORF-T	YDR329C	PEX3	481	12	1071	13	451.728	1140.4	1385	0.872487	2.39285	1.46915	4.34555	0.326158	0.823393	0.396114	0.550645	0.136305	0.18948	0.719364
4356	ST4356	chrIV	-	1132977	1135457	ORF-T	YDR333C	YDR333C	1331	35	833	45	1250	886.978	2481	0.660834	1.93641	0.163332	1.17743	0.503829	0.357508	1.40928	1.64461	0.260188	0.303635	0.856911
4358	ST4358	chrIV	-	1147249	1149521	ORF-T	YDR338C	YDR338C	930	87	777	83	873.404	827.349	2273	-1.16985	0.310413	-0.929375	0.3948	0.384252	0.36399	1.05567	0.786253	1.23787	0.921959	1.34265
4359	ST4359	chrIV	-	1149817	1150553	ORF-T	YDR339C	FCF1	1031	90	397	89	968.258	422.725	737	0.940907	2.5623	0.734316	2.08406	1.31378	0.573576	2.29051	1.22948	0.512735	0.275221	1.863
4360	ST4360	chrIV	-	1151617	1153673	ORF-T	YDR341C	YDR341C	3895	29	1093	118	3657.97	1163.83	2057	1.85492	6.39118	1.14358	3.13799	1.7783	0.565788	3.14305	2.03671	0.278243	0.180303	1.5432
4361	ST4361	chrIV	-	1162785	1164689	ORF-T	YDR345C	HXT3	4766	131	193	1084	4475.96	205.506	1905	2.0785	7.99247	-3.24893	0.0388155	2.34959	0.107877	21.7802	205.909	0.293975	2.77923	0.105776
4363	ST4363	chrIV	-	1166945	1168857	ORF-T	YDR346C	SVF1	3450	50	2023	406	3240.05	2154.09	1913	1.72591	5.61761	1.27628	3.5833	1.6937	1.12603	1.50414	1.56772	0.301498	0.314243	0.959443
4364	ST4364	chrIV	-	1170177	1172057	ORF-T	YDR348C	YDR348C	1257	100	695	150	1180.5	740.035	1881	0.874438	2.39753	0.407117	1.50248	0.627594	0.393427	1.5952	1.59571	0.261767	0.261851	0.999678
4365	ST4365	chrIV	-	1172297	1174273	ORF-T	YDR349C	YPS7	1686	226	1035	97	1583.4	1102.07	1977	0.561698	1.75365	0.387636	1.47349	0.800909	0.557444	1.43675	1.19013	0.45671	0.378315	1.20722
4367	ST4367	chrIV	-	1176009	1178209	ORF-T	YDR350C	ATP22	898	25	1190	31	843.352	1267.11	2201	-0.318158	0.727488	-0.108622	0.89707	0.383167	0.575698	0.66557	0.81096	0.526699	0.641754	0.820719
4370	ST4370	chrIV	-	1189105	1189729	ORF-T	YDR357C	YDR357C	324	151	1222	357	304.283	1301.18	625	1.10624	3.02298	2.25978	9.58095	0.486852	2.0819	0.233851	0.31552	0.16105	0.217295	0.741159
4371	ST4371	chrIV	-	1191905	1195153	ORF-T	YDR359C	EAF1	1288	49	1574	117	1209.62	1675.99	3249	-0.626382	0.534522	0.115359	1.12228	0.372305	0.515849	0.721732	0.476284	0.696519	0.459645	1.51534
4372	ST4372	chrIV	-	1195153	1196297	ORF-T	YDR361C	BCP1	1308	278	304	258	1228.4	323.699	1145	1.30891	3.70213	0.516757	1.67658	1.07284	0.282707	3.79489	2.20814	0.28979	0.168621	1.71859
4373	ST4373	chrIV	-	1196521	1198793	ORF-T	YDR362C	TFC6	723	93	757	175	679.001	806.053	2273	-0.66692	0.513287	-0.626963	0.534212	0.298725	0.354621	0.842378	0.960831	0.581984	0.663821	0.876719
4374	ST4374	chrIV	-	1202425	1204225	ORF-T	YDR364C	CDC40	1035	308	604	452	972.014	643.139	1801	0.131408	1.14043	0.105537	1.11131	0.539708	0.357101	1.51136	1.02621	0.473248	0.321334	1.47276
4376	ST4376	chrIV	-	1204489	1206441	ORF-T	YDR365C	ESF1	2452	26	1244	75	2302.78	1324.61	1953	1.52026	4.57343	1.72563	5.61604	1.1791	0.678244	1.73846	0.814353	0.257815	0.120769	2.13478
4377	ST4377	chrIV	-	1215017	1217601	ORF-T	YDR369C	XRS2	395	68	471	96	370.962	501.52	2585	-1.09376	0.334956	-0.541615	0.581808	0.143506	0.194012	0.739675	0.575715	0.428431	0.333464	1.28479
4378	ST4378	chrIV	-	1217769	1219105	ORF-T	YDR370C	YDR370C	787	17	492	21	739.107	523.881	1337	-0.184128	0.831829	-0.470328	0.624797	0.55281	0.391833	1.41083	1.33136	0.664571	0.627137	1.05969
4379	ST4379	chrIV	-	1220961	1222449	ORF-T	YDR372C	VPS74	1470	29	1198	79	1380.54	1275.63	1489	1.85425	6.38692	1.19508	3.30384	0.927161	0.856702	1.08224	1.93318	0.145166	0.259305	0.559825
4380	ST4380	chrIV	-	1225065	1226521	ORF-T	YDR375C	BCS1	1008	132	874	207	946.657	930.634	1457	-0.206644	0.813309	-0.11914	0.887683	0.649731	0.638733	1.01722	0.916216	0.798873	0.719551	1.11024
4381	ST4381	chrIV	-	1226521	1228217	ORF-T	YDR375C	BCS1	83	513	1130	746	77.949	1203.22	1697	-4.65793	0.00948605	-1.00987	0.364266	0.0459334	0.709029	0.0647835	0.0260415	4.84221	1.94646	2.4877
4382	ST4382	chrIV	-	1229089	1229633	ORF-T	YDR378C	LSM6	1388	286	1068	1580	1303.53	1137.21	545	2.37766	10.7796	1.93189	6.90253	2.3918	2.08662	1.14626	1.56169	0.221882	0.302297	0.733986
4383	ST4383	chrIV	-	1233129	1233553	ORF-T	YDR379C-A	YDR379C-A	97	65	843	113	91.097	897.626	425	0.537238	1.71127	1.65969	5.2577	0.214346	2.11206	0.101487	0.32548	0.125255	0.401708	0.311806
4386	ST4386	chrIV	-	1238137	1239121	ORF-T	YDR381C-A	YDR381C-A	402	503	971	671	377.536	1033.92	985	0.344647	1.41149	1.39641	4.04066	0.383285	1.04966	0.36515	0.349322	0.271546	0.259775	1.04531
4387	ST4387	chrIV	-	1239897	1240681	ORF-T	YDR383C	NKP1	356	1847	517	610	334.335	550.501	785	-0.544976	0.579856	0.255955	1.29169	0.425905	0.701275	0.607329	0.448911	0.734502	0.542911	1.35289
4388	ST4388	chrIV	-	1241041	1242129	ORF-T	YDR384C	ATO3	1109	40	2471	24	1041.51	2631.12	1089	0.37016	1.44797	2.14289	8.524	0.956392	2.41609	0.395843	0.169869	0.660507	0.283445	2.33028
4389	ST4389	chrIV	-	1248073	1249953	ORF-T	YDR387C	YDR387C	731	36	1017	66	686.514	1082.9	1881	0.0160258	1.01615	0.0769469	1.07998	0.364973	0.575705	0.633959	0.940898	0.359171	0.533068	0.673781
4391	ST4391	chrIV	-	1254881	1256881	ORF-T	YDR390C	UBA2	1048	24	688	47	984.223	732.582	2001	0.833541	2.30145	0.860774	2.36499	0.491866	0.366108	1.3435	0.973134	0.21372	0.154803	1.38059
4392	ST4392	chrIV	-	1257273	1258465	ORF-T	YDR391C	YDR391C	736	40	994	69	691.21	1058.41	1193	0.457443	1.58003	0.460768	1.58529	0.579388	0.887184	0.653064	0.996681	0.366695	0.559635	0.655239
4396	ST4396	chrIV	-	1266273	1266969	ORF-T	YDR397C	NCB2	1481	150	861	40	1390.87	916.792	697	0.880851	2.41295	1.59467	4.92669	1.99551	1.31534	1.51711	0.489772	0.827001	0.266983	3.09758
4399	ST4399	chrIV	-	1276577	1277361	ORF-T	YDR404C	RPB7	1071	34	1071	56	1005.82	1140.4	785	1.42974	4.1776	0.911634	2.48838	1.2813	1.45274	0.881992	1.67884	0.306708	0.583808	0.525357
4402	ST4402	chrIV	-	1284009	1288009	ORF-T	YDR407C	TRS120	1224	24	987	70	1149.51	1050.96	4001	-0.443159	0.642005	-0.957605	0.383811	0.287306	0.262674	1.09378	1.67271	0.447514	0.684383	0.653894
4403	ST4403	chrIV	-	1288073	1288929	ORF-T	YDR408C	ADE8	2143	589	1012	260	2012.59	1077.58	857	1.04952	2.85629	0.830897	2.29538	2.34841	1.25738	1.8677	1.24436	0.82219	0.547789	1.50092
4405	ST4405	chrIV	-	1292321	1293145	ORF-T	YDR410C	STE14	817	269	399	219	767.281	424.855	825	1.0538	2.86853	-0.297435	0.742721	0.930037	0.514976	1.80598	3.86219	0.324221	0.693364	0.467606
4406	ST4406	chrIV	-	1293321	1294457	ORF-T	YDR411C	DFM1	1353	21	1387	39	1270.66	1476.88	1137	0.758652	2.1354	1.05812	2.88096	1.11756	1.29892	0.860371	0.74121	0.523349	0.450865	1.16077
4407	ST4407	chrIV	-	1295393	1296865	other	YDR413C, YDR414C	YDR413C, ERD1	589	257	314	256	553.156	334.347	1473	-0.0469301	0.954154	-2.29861	0.100398	0.37553	0.226984	1.65444	9.50372	0.393574	2.26084	0.174083
4408	ST4408	chrIV	-	1296985	1298201	ORF-T	YDR415C	YDR415C	803	631	623	185	754.133	663.37	1217	0.503333	1.65423	-0.410665	0.663209	0.619665	0.545086	1.13682	2.49428	0.374595	0.821892	0.455772
4411	ST4411	chrIV	-	1315033	1317833	ORF-T	YDR422C	SIP1	1152	29	981	51	1081.89	1044.57	2801	-0.830276	0.435929	-0.00632077	0.993699	0.386253	0.372927	1.03573	0.438693	0.886045	0.375291	2.36095
4412	ST4412	chrIV	-	1317985	1319233	ORF-T	YDR423C	CAD1	868	191	1289	74	815.177	1372.53	1249	-0.450716	0.637172	0.647799	1.91133	0.652664	1.0989	0.593925	0.333366	1.02431	0.57494	1.7816
4413	ST4413	chrIV	-	1319401	1319889	ORF-T	YDR424C	DYN2	399	502	543	440	374.719	578.186	489	1.12437	3.07829	1.54921	4.70773	0.766296	1.18238	0.648093	0.653878	0.248936	0.251158	0.991153
4414	ST4414	chrIV	-	1323401	1324345	ORF-T	YDR428C	YDR428C	623	204	353	170	585.087	375.874	945	-0.516073	0.59686	0.225998	1.25357	0.61914	0.39775	1.5566	0.476127	1.03733	0.317293	3.2693
4415	ST4415	chrIV	-	1324345	1325329	ORF-T	YDR429C	TIF35	3073	33	1200	23	2885.99	1277.76	985	2.23918	9.38565	1.67679	5.34837	2.92994	1.29722	2.25863	1.75486	0.312172	0.242544	1.28707
4416	ST4416	chrIV	-	1325505	1328537	ORF-T	YDR430C	CYM1	1004	90	1375	39	942.901	1464.1	3033	-0.630432	0.532362	-0.430457	0.650212	0.310881	0.482723	0.644014	0.818751	0.583965	0.742409	0.786581
4417	ST4417	chrIV	-	1332809	1333985	ORF-T	YDR435C	PPM1	441	113	1217	88	414.163	1295.86	1177	0.272016	1.31261	0.716565	2.04739	0.35188	1.10099	0.319604	0.641113	0.268077	0.537751	0.498515
4420	ST4420	chrIV	-	1344225	1345209	ORF-T	YDR441C	APT2	1765	92	694	93	1657.59	738.971	985	0.0116579	1.01173	0.0799511	1.08323	1.68283	0.750224	2.24311	0.933987	1.66333	0.692578	2.40165
4421	ST4421	chrIV	-	1345369	1350017	ORF-T	YDR443C	SSN2	625	10	992	57	586.965	1056.28	4649	-0.6282	0.533551	-0.319541	0.726483	0.126256	0.227206	0.55569	0.734431	0.236634	0.312748	0.756627
4423	ST4423	chrIV	-	1354769	1355601	ORF-T	YDR447C	RPS17B	5541	12	1248	7	5203.8	1328.87	833	-0.0327639	0.967767	-0.858277	0.423892	6.24706	1.59528	3.91596	2.28305	6.45512	3.76341	1.71523
4424	ST4424	chrIV	-	1357441	1358945	ORF-T	YDR449C	UTP6	1476	73	205	93	1386.18	218.284	1505	0.182308	1.19998	-0.931593	0.393926	0.921048	0.145039	6.35034	3.04622	0.76755	0.368189	2.08466
4425	ST4425	chrIV	-	1360913	1362225	ORF-T	YDR451C	YHP1	1234	518	1861	288	1158.9	1981.59	1313	0.00346327	1.00347	0.475762	1.60924	0.882638	1.50921	0.584835	0.623567	0.879587	0.937839	0.937886
4426	ST4426	chrIV	-	1365025	1365713	ORF-T	YDR453C	TSA2	202	214	511	223	189.707	544.112	689	-1.05295	0.348907	1.61525	5.02914	0.275337	0.789713	0.348654	0.0693771	0.789141	0.157028	5.02549
4427	ST4427	chrIV	-	1366153	1366857	ORF-T	YDR454C	GUK1	1482	60	682	410	1391.81	726.193	705	1.72588	5.61749	1.1969	3.30986	1.9742	1.03006	1.91659	1.6972	0.351438	0.31121	1.12926
4428	ST4428	chrIV	-	1379873	1382089	ORF-T	YDR458C	HEH2	748	26	927	46	702.48	987.069	2217	-0.289056	0.74897	0.258684	1.29522	0.316861	0.445227	0.711683	0.578255	0.423062	0.343745	1.23074
4429	ST4429	chrIV	-	1382121	1383545	ORF-T	YDR459C	PFA5	741	66	592	173	695.906	630.361	1425	-0.0744231	0.928279	0.138013	1.14799	0.488355	0.442359	1.10398	0.808612	0.526087	0.385333	1.36528
4432	ST4432	chrIV	-	1385361	1385817	ORF-T	YDR461C-A	YDR461C-A	139	965	901	306	130.541	959.384	457	-0.53905	0.583302	2.00564	7.43084	0.285648	2.09931	0.136068	0.0784974	0.489708	0.282513	1.7334
4433	ST4433	chrIV	-	1393185	1394625	ORF-T	YDR465C	RMT2	1163	90	77	85	1092.22	81.9895	1441	1.25585	3.51081	0.0912738	1.09557	0.757963	0.0568977	13.3215	3.20455	0.215894	0.0519344	4.15706
4434	ST4434	chrIV	-	1397913	1398849	ORF-T	YDR468C	TLG1	695	88	459	119	652.705	488.743	937	1.13387	3.10767	0.772229	2.16459	0.69659	0.521604	1.33548	1.43569	0.224152	0.240972	0.930202
4435	ST4435	chrIV	-	1399609	1401297	ORF-T	YDR470C	UGO1	603	144	853	111	566.304	908.274	1689	-0.877517	0.415814	-0.200387	0.818414	0.33529	0.537758	0.623495	0.508073	0.806345	0.657074	1.22718
4436	ST4436	chrIV	-	1404361	1405905	ORF-T	YDR473C	PRP3	480	60	451	46	450.789	480.224	1545	-0.463591	0.629021	0.271656	1.31214	0.291773	0.310825	0.938705	0.479387	0.463853	0.236885	1.95814
4437	ST4437	chrIV	-	1407361	1410185	ORF-T	YDR475C	JIP4	780	159	1155	71	732.533	1229.84	2825	0.212077	1.23624	0.00492239	1.00493	0.259304	0.435343	0.595631	1.23017	0.209751	0.433205	0.484185
4438	ST4438	chrIV	-	1410273	1411177	ORF-T	YDR476C	YDR476C	767	555	1246	740	720.324	1326.74	905	-0.471138	0.624291	-0.0105193	0.989536	0.795938	1.46601	0.542928	0.630893	1.27495	1.48151	0.86057
4439	ST4439	chrIV	-	1415137	1416913	ORF-T	YDR479C	PEX29	645	244	1492	104	605.748	1588.68	1777	0.0726612	1.07537	0.814973	2.25911	0.340882	0.894024	0.38129	0.476012	0.316992	0.395741	0.801009
4440	ST4440	chrIV	-	1418441	1420289	ORF-T	YDR481C	PHO8	2656	70	1718	77	2494.37	1829.32	1849	1.85316	6.37998	1.44049	4.22278	1.34904	0.989359	1.36355	1.51085	0.211448	0.234291	0.902503
4441	ST4441	chrIV	-	1420353	1420937	ORF-T	YDR482C	CWC21	522	67	257	61	490.233	273.653	585	-0.31026	0.733256	0.02663	1.02699	0.838006	0.467784	1.79144	0.713987	1.14286	0.455491	2.50906
4442	ST4442	chrIV	-	1424689	1427217	ORF-T	YDR485C	VPS72	1005	41	960	43	943.84	1022.21	2529	-0.893565	0.409194	0.165401	1.17987	0.373207	0.404194	0.923335	0.346814	0.912052	0.342576	2.66233
4443	ST4443	chrIV	-	1427345	1428153	ORF-T	YDR486C	VPS60	496	408	602	383	465.816	641.009	809	0.96951	2.63665	1.51362	4.54314	0.575792	0.792347	0.726691	0.580359	0.21838	0.174405	1.25214
4444	ST4444	chrIV	-	1428305	1429041	ORF-T	YDR487C	RIB3	1667	73	1359	64	1565.55	1447.06	737	1.70023	5.47522	1.5399	4.66412	2.12422	1.96345	1.08188	1.1739	0.387971	0.420969	0.921615
4445	ST4445	chrIV	-	1429073	1430801	ORF-T	YDR488C	PAC11	498	31	584	40	467.694	621.843	1729	-1.60528	0.200834	-1.54603	0.213093	0.2705	0.359655	0.75211	0.942473	1.34688	1.68778	0.798017
4446	ST4446	chrIV	-	1431889	1434361	ORF-T	YDR490C	PKH1	591	160	1453	134	555.034	1547.15	2473	-1.32755	0.265127	-0.416299	0.659483	0.224438	0.625618	0.358746	0.402022	0.846529	0.948649	0.892352
4449	ST4449	chrIV	-	1438081	1441201	ORF-T	YDR495C	VPS3	475	62	479	87	446.094	510.039	3121	-1.64729	0.192571	-0.988209	0.372243	0.142933	0.163422	0.874627	0.517325	0.742237	0.439019	1.69067
4450	ST4450	chrIV	-	1441345	1443433	ORF-T	YDR496C	PUF6	2424	9	293	26	2276.49	311.986	2089	1.07401	2.9271	0.585159	1.79528	1.08975	0.149347	7.29675	1.63044	0.372297	0.083189	4.47531
4451	ST4451	chrIV	-	1443625	1445545	ORF-T	YDR497C	ITR1	2616	19	7025	21	2456.8	7480.21	1921	1.51084	4.53054	1.79042	5.99195	1.27892	3.89392	0.32844	0.756104	0.282288	0.649858	0.434385
4452	ST4452	chrIV	-	1445761	1447033	ORF-T	YDR498C	SEC20	625	47	1028	840	586.965	1094.61	1273	-0.324386	0.722971	-0.0959658	0.908495	0.461088	0.859869	0.53623	0.79579	0.637768	0.946476	0.673834
4453	ST4453	chrIV	-	1450097	1450881	ORF-T	YDR500C	RPL37B	6128	32	1973	56	5755.08	2100.85	785	-0.535033	0.58565	-0.151557	0.859369	7.33131	2.67624	2.73941	0.681488	12.5182	3.11419	4.01974
4455	ST4455	chrIV	-	1453097	1454497	ORF-T	YDR502C	SAM2	854	55	428	59	802.029	455.734	1401	1.40474	4.07447	-0.912923	0.401349	0.572469	0.325292	1.75986	10.1519	0.140501	0.810496	0.173352
4456	ST4456	chrIV	-	1454897	1455905	ORF-T	YDR503C	LPP1	347	80	455	30	325.883	484.484	1009	-0.857264	0.424321	-1.42172	0.241298	0.322976	0.480162	0.67264	1.75849	0.761159	1.98991	0.38251
4457	ST4457	chrIV	-	1456065	1459457	ORF-T	YDR504C, YDR505C	SPG3, PSP1	937	224	2858	82	879.978	3043.2	3393	0.725745	2.06627	1.02948	2.79961	0.259351	0.896904	0.289162	0.738057	0.125517	0.320368	0.391789
4458	ST4458	chrIV	-	1459633	1461577	ORF-T	YDR506C	YDR506C	280	806	370	752	262.96	393.976	1945	-1.58435	0.205081	-1.1925	0.303461	0.135198	0.202558	0.667453	0.675807	0.659244	0.667494	0.98764
4459	ST4459	chrIV	-	1462137	1465897	ORF-T	YDR507C	GIN4	1207	62	909	102	1133.55	967.902	3761	-0.616596	0.539779	-0.863234	0.421796	0.301395	0.257352	1.17114	1.27972	0.558368	0.610135	0.915154
4460	ST4460	chrIV	-	1466241	1468489	ORF-T	YDR508C	GNP1	2812	112	3541	105	2640.87	3770.45	2249	0.74223	2.10062	0.515933	1.6752	1.17424	1.6765	0.700413	1.25395	0.559	1.00078	0.558566
4461	ST4461	chrIV	-	1470417	1470825	ORF-T	YDR512C	EMI1	243	84	922	268	228.212	981.745	409	1.31003	3.70628	2.00702	7.44114	0.557976	2.40035	0.232456	0.49808	0.150549	0.322579	0.466703
4462	ST4462	chrIV	-	1471457	1473041	ORF-T	YDR514C	YDR514C	845	180	371	1042	793.577	395.04	1585	-0.112469	0.893625	-1.26578	0.282018	0.500679	0.249237	2.00885	3.16868	0.560279	0.883761	0.633971
4463	ST4463	chrIV	-	1474865	1476513	ORF-T	YDR516C	EMI2	701	196	6222	56	658.34	6625.18	1649	1.26024	3.52626	1.59017	4.90459	0.399236	4.0177	0.0993694	0.718972	0.113218	0.81917	0.13821
4466	ST4466	chrIV	-	1480961	1483489	ORF-T	YDR520C	YDR520C	631	154	485	118	592.6	516.428	2529	-1.19648	0.302257	-0.883136	0.413484	0.234322	0.204202	1.1475	0.731	0.775241	0.493858	1.56977
4467	ST4467	chrIV	-	1485681	1487025	ORF-T	YDR523C	SPS1	38	5	63	25	35.6875	67.0823	1345	-2.85154	0.0577554	-3.03807	0.0479271	0.0265334	0.0498754	0.531995	1.20507	0.459411	1.04065	0.441465
4468	ST4468	chrIV	-	1487257	1489081	ORF-T	YDR524C	AGE1	1607	69	1178	116	1509.2	1254.33	1825	0.242038	1.27384	-0.0869036	0.916765	0.826962	0.687306	1.20319	1.3895	0.649186	0.749708	0.86592
4470	ST4470	chrIV	-	1489321	1489889	other	YDR524C-B, YDR524C-A	YDR524C-B, YDR524C-A	16570	99	10268	41	15561.6	10933.4	569	3.10826	22.3821	2.79505	16.3634	27.3491	19.215	1.42332	1.36781	1.22192	1.17427	1.04058
4474	ST4474	chrIV	-	1495953	1496585	ORF-T	YDR529C	QCR7	810	72	6170	43	760.707	6569.81	633	2.16165	8.68549	2.5016	12.202	1.20175	10.3788	0.115788	0.71181	0.138363	0.850588	0.162667
4475	ST4475	chrIV	-	1496649	1497961	ORF-T	YDR530C	APA2	558	138	2250	774	524.042	2395.8	1313	-0.036305	0.964346	0.964024	2.62223	0.399118	1.82467	0.218734	0.367759	0.413875	0.69585	0.594776
4476	ST4476	chrIV	-	1499361	1500561	ORF-T	YDR532C	YDR532C	439	86	841	107	412.284	895.496	1201	-0.562055	0.570037	0.142096	1.15269	0.343284	0.745625	0.460398	0.494529	0.602214	0.646859	0.930983
4477	ST4477	chrIV	-	1501257	1502385	ORF-T	YDR533C	HSP31	306	94	547	160	287.378	582.445	1129	0.0551643	1.05671	1.8036	6.07145	0.254542	0.515895	0.493399	0.174047	0.240881	0.0849706	2.83487
4478	ST4478	chrIV	-	1503321	1507073	other	YDR534C, YDR535C	FIT1, YDR535C	139	9	450	52	130.541	479.16	3753	-3.09879	0.0451038	-1.64356	0.193291	0.0347831	0.127674	0.272437	0.233347	0.771179	0.660528	1.16752
4483	ST4483	chrIV	-	1516865	1517793	ORF-T	YDR540C	IRC4	63	73	32	38	59.1661	34.0736	929	-1.45288	0.233896	-3.08725	0.0456275	0.0636879	0.0366777	1.73642	5.1262	0.272292	0.803851	0.338735
4484	ST4484	chrIV	-	1519401	1520905	ORF-T	YDR541C	YDR541C	357	15	291	31	335.274	309.857	1505	-0.158774	0.853189	-0.580549	0.559591	0.222774	0.205885	1.08203	1.52467	0.261107	0.36792	0.709684
4222	ST4222	chrIV	-	651936	653120	other	YDRCdelta9	YDRCdelta9	200	720	139	1261	187.829	148.007	1185	-2.01714	0.133035	-2.27421	0.102879	0.158505	0.1249	1.26905	1.29313	1.19146	1.21406	0.981384
1570	ST1570	chrIX	+	32601	32721	CUTs	CUT185	CUT185	5	6	16	0	4.69572	17.0368	121	-4.55803	0.0104827	-4.03837	0.0176261	0.0388076	0.1408	0.275622	0.594726	3.70207	7.98815	0.463445
1589	ST1589	chrIX	+	100001	100385	CUTs	CUT186	CUT186	114	75	90	60	107.062	95.8319	385	-4.18452	0.0152295	-4.10506	0.0164891	0.278084	0.248914	1.11719	0.923611	18.2596	15.0957	1.20959
1590	ST1590	chrIX	+	100385	100897	CUTs	CUT187	CUT187	51	138	61	125	47.8964	64.9527	513	-4.71245	0.00898274	-4.76909	0.00848814	0.0933652	0.126614	0.737403	1.05827	10.3938	14.9165	0.696801
1616	ST1616	chrIX	+	187953	188457	CUTs	CUT188	CUT188	601	264	373	322	564.426	397.17	505	-4.3925	0.0123698	-4.99409	0.00677789	1.11767	0.786475	1.42112	1.82502	90.3551	116.035	0.778685
1621	ST1621	chrIX	+	202849	204145	CUTs	CUT189	CUT189	323	1102	168	886	303.344	178.886	1297	-4.97466	0.00691088	-4.87901	0.00760455	0.233881	0.137923	1.69573	0.908782	33.8425	18.1369	1.86594
1622	ST1622	chrIX	+	212193	212449	CUTs	CUT190	CUT190	149	2	32	3	139.932	34.0736	257	-5.39079	0.00455837	-4.65696	0.00949532	0.544484	0.132582	4.10677	0.480065	119.447	13.9629	8.55462
1625	ST1625	chrIX	+	220969	221361	CUTs	CUT191	CUT191	332	215	231	96	311.796	245.969	393	-4.46516	0.0115028	-4.84209	0.00789051	0.793374	0.625874	1.26762	1.45781	68.972	79.3199	0.869542
1629	ST1629	chrIX	+	249473	249697	CUTs	CUT192	CUT192	83	3	50	7	77.949	53.24	225	-4.29367	0.0136547	-4.63834	0.00967373	0.34644	0.236622	1.46411	1.41152	25.3716	24.4603	1.03726
1635	ST1635	chrIX	+	264937	265057	CUTs	CUT193	CUT193	19	49	30	31	17.8437	31.944	121	-4.58264	0.0102279	-1.98638	0.137191	0.147469	0.264	0.558595	0.074552	14.4183	1.92432	7.49269
1639	ST1639	chrIX	+	274089	274537	CUTs	CUT194	CUT194	179	839	208	538	168.107	221.478	449	-2.48686	0.0831711	-4.58608	0.0101928	0.374403	0.49327	0.759022	8.15982	4.5016	48.3942	0.0930194
1668	ST1668	chrIX	+	355553	356321	CUTs	CUT195	CUT195	73	75	31	105	68.5575	33.0088	769	-5.03872	0.00648203	-5.18107	0.00562197	0.0891515	0.0429243	2.07695	1.15298	13.7536	7.63509	1.80137
1587	ST1587	chrIX	+	96857	97217	other	snR68	SNR68	6872	177	3186	44	6453.8	3392.45	361	-0.425828	0.653228	-0.724836	0.484404	17.8776	9.39737	1.9024	1.34852	27.368	19.3999	1.41073
1569	ST1569	chrIX	+	30993	32601	SUTs	SUT175	SUT175	320	141	272	105	300.526	289.625	1609	-1.7271	0.1778	-1.16801	0.310984	0.186778	0.180003	1.03764	0.571733	1.0505	0.578818	1.8149
1571	ST1571	chrIX	+	35105	37217	SUTs	SUT176	SUT176	446	253	342	399	418.858	364.161	2113	-2.06432	0.126904	-2.94379	0.0526657	0.198229	0.172343	1.1502	2.40961	1.56204	3.2724	0.477338
1574	ST1574	chrIX	+	40209	41633	SUTs	SUT177	SUT177	172	5	213	1398	161.533	226.802	1425	-2.63362	0.0718178	-3.88141	0.0206218	0.113356	0.159159	0.712219	3.48262	1.57839	7.71803	0.204507
1582	ST1582	chrIX	+	76329	76937	SUTs	SUT178	SUT178	132	929	555	285	123.967	590.964	609	-3.20042	0.0407449	-0.462411	0.629763	0.203558	0.970383	0.209771	0.0646988	4.99592	1.54087	3.24227
1600	ST1600	chrIX	+	136417	137105	SUTs	SUT179	SUT179	308	237	88	146	289.256	93.7023	689	-2.99362	0.0501056	-4.07276	0.0170303	0.419821	0.135998	3.08697	2.94215	8.37871	7.98563	1.04922
1603	ST1603	chrIX	+	150225	150529	SUTs	SUT180	SUT180	24	6	20	4	22.5395	21.296	305	-3.8595	0.0210786	-4.1744	0.0153844	0.0738999	0.0698229	1.05839	1.37013	3.50592	4.53854	0.772477
1611	ST1611	chrIX	+	173849	174713	SUTs	SUT181	SUT181	312	4	550	6	293.013	585.64	865	-2.34136	0.0961971	-1.86288	0.155224	0.338743	0.67704	0.50033	0.61973	3.52135	4.36169	0.807335
1620	ST1620	chrIX	+	202249	202849	SUTs	SUT182	SUT182	698	292	217	282	655.523	231.061	601	-3.21469	0.0401677	-3.96267	0.0190124	1.09072	0.384462	2.83701	2.11272	27.1541	20.2217	1.34282
1626	ST1626	chrIX	+	222865	224409	SUTs	SUT183	SUT183	437	53	312	113	410.406	332.217	1545	-1.42425	0.240689	-1.66296	0.189577	0.265635	0.215027	1.23535	1.26961	1.10364	1.13425	0.973018
1627	ST1627	chrIX	+	224409	226489	SUTs	SUT184	SUT184	90	73	86	85	84.523	91.5727	2081	-3.12607	0.04389	-2.23065	0.107459	0.0406165	0.0440042	0.923015	0.408437	0.925416	0.409499	2.25987
1643	ST1643	chrIX	+	281153	281257	SUTs	SUT185	SUT185	1	39	0	15	0.939144	0	105	-3.38222	0.0339721	-2.89885	0.0550863	0.00894423	0	#DIV/0!	0.616707	0.263282	0	#DIV/0!
1644	ST1644	chrIX	+	283089	284777	SUTs	SUT186	SUT186	201	11	212	46	188.768	225.737	1689	-2.2763	0.102663	-2.00174	0.1351	0.111763	0.133652	0.836228	0.759907	1.08864	0.989279	1.10043
1646	ST1646	chrIX	+	289257	290385	SUTs	SUT187	SUT187	524	821	137	1444	492.112	145.877	1129	-2.10745	0.121548	-3.28804	0.0373269	0.435883	0.129209	3.37346	3.2563	3.58611	3.46156	1.03598
1647	ST1647	chrIX	+	290425	292265	SUTs	SUT188	SUT188	305	962	77	2162	286.439	81.9895	1841	-3.8865	0.020517	-4.59219	0.0101307	0.155589	0.0445353	3.4936	2.02524	7.58339	4.39609	1.72503
1657	ST1657	chrIX	+	328057	331585	SUTs	SUT189	SUT189	395	429	472	556	370.962	502.585	3529	-2.26106	0.10424	-1.85447	0.156535	0.105118	0.142416	0.738108	0.665919	1.00842	0.909799	1.1084
1660	ST1660	chrIX	+	337185	339337	SUTs	SUT190	SUT190	595	410	361	531	558.791	384.392	2153	-2.93031	0.0533803	-2.80483	0.0605174	0.259541	0.178538	1.4537	0.882067	4.8621	2.9502	1.64806
1669	ST1669	chrIX	+	357097	357465	SUTs	SUT191	SUT191	54	50	56	53	50.7138	59.6288	369	-1.45436	0.23355	-1.07373	0.34173	0.137436	0.161596	0.850492	0.683435	0.588463	0.472875	1.24444
1679	ST1679	chrIX	+	384177	384601	SUTs	SUT192	SUT192	14	6	129	16	13.148	137.359	425	-4.63841	0.00967305	-2.15254	0.116189	0.0309365	0.323198	0.0957201	0.0832529	3.19822	2.78166	1.14975
1681	ST1681	chrIX	+	387001	388449	SUTs	SUT193	SUT193	189	18	200	50	177.498	212.96	1449	-2.52481	0.0800737	-2.93093	0.0533472	0.122497	0.14697	0.833482	1.50099	1.5298	2.75497	0.555288
1682	ST1682	chrIX	+	389241	393065	SUTs	SUT194	SUT194	269	53	128	82	252.63	136.294	3825	-4.65346	0.00952861	-4.5174	0.0109174	0.066047	0.0356325	1.85356	0.872792	6.93144	3.26383	2.12371
1687	ST1687	chrIX	+	406593	407841	SUTs	SUT195	SUT195	45	25	182	26	42.2615	193.793	1249	-3.31758	0.0362405	-0.521515	0.593621	0.0338363	0.155159	0.218075	0.0610499	0.933659	0.261377	3.57208
1690	ST1690	chrIX	+	412081	412721	SUTs	SUT196	SUT196	24	69	34	138	22.5395	36.2032	641	-4.43272	0.0118821	-3.26055	0.0383671	0.035163	0.0564792	0.622583	0.309695	2.95932	1.47207	2.01031
1692	ST1692	chrIX	+	421041	421793	SUTs	SUT197	SUT197	33	824	44	509	30.9918	46.8512	753	-4.21415	0.0147848	-4.07787	0.0169435	0.0411577	0.0622193	0.661494	0.872598	2.78378	3.67217	0.758074
1667	ST1667	chrIX	+	353817	355553	ORF-T	YIL001W	YIL001W	902	33	672	25	847.108	715.545	1737	-0.861844	0.422383	-0.618965	0.538501	0.487685	0.411943	1.18386	0.784367	1.1546	0.76498	1.50932
1666	ST1666	chrIX	+	350257	350721	ORF-T	YIL002W-A	YIL002W-A	843	101	565	116	791.699	601.612	465	0.913505	2.49305	1.54611	4.69319	1.70258	1.29379	1.31596	0.531205	0.682931	0.275674	2.47732
1665	ST1665	chrIX	+	349065	350081	ORF-T	YIL003W	CFD1	421	301	245	550	395.38	260.876	1017	-0.134833	0.873862	-0.0482945	0.952853	0.388771	0.256515	1.51559	0.9171	0.444888	0.269207	1.65259
1664	ST1664	chrIX	+	345545	347985	ORF-T	YIL005W	EPS1	842	191	1036	211	790.759	1103.13	2441	-0.223611	0.799626	-0.0334988	0.967056	0.323949	0.451918	0.716831	0.826866	0.405126	0.467313	0.866925
1663	ST1663	chrIX	+	343785	345369	ORF-T	YIL006W	YIA6	696	69	853	61	653.644	908.274	1585	-1.76292	0.171543	-1.07504	0.341285	0.412394	0.573043	0.719656	0.50264	2.40402	1.67908	1.43175
1662	ST1662	chrIX	+	342433	343017	ORF-T	YIL008W	URM1	521	65	165	164	489.294	175.692	585	1.24721	3.48061	0.903494	2.46821	0.8364	0.300328	2.78496	1.41017	0.240303	0.121678	1.9749
1661	ST1661	chrIX	+	339337	341681	ORF-T	YIL009W	FAA3	1475	13	1505	32	1385.24	1602.52	2345	0.00935501	1.0094	-0.304285	0.73765	0.59072	0.683379	0.864411	1.3684	0.585219	0.926426	0.631696
1659	ST1659	chrIX	+	334849	335705	ORF-T	YIL010W	DOT5	389	135	676	93	365.327	719.804	857	0.421959	1.52495	0.667236	1.94884	0.426286	0.839912	0.507537	0.782488	0.279542	0.43098	0.648619
1658	ST1658	chrIX	+	333657	334849	ORF-T	YIL011W	TIR3	81	64	61	124	76.0707	64.9527	1193	-0.375218	0.687139	-2.68839	0.0679905	0.0637642	0.0544449	1.17117	10.1064	0.0927966	0.800772	0.115884
1656	ST1656	chrIX	+	325937	328041	ORF-T	YIL014W	MNT3	1017	28	677	47	955.11	720.869	2105	0.364422	1.43968	0.262171	1.29975	0.453734	0.342456	1.32494	1.10766	0.315163	0.263478	1.19616
1655	ST1655	chrIX	+	323321	324209	ORF-T	YIL015W	BAR1	1225	81	274	22	1150.45	291.755	889	0.920461	2.51045	-1.48017	0.227598	1.2941	0.328183	3.94321	11.0302	0.515484	1.44194	0.357493
1654	ST1654	chrIX	+	321225	321985	ORF-T	YIL016W	SNL1	809	1085	623	524	759.768	663.37	761	0.0996107	1.10474	0.0112267	1.01129	0.998381	0.871708	1.14532	1.09241	0.903724	0.861976	1.04843
1653	ST1653	chrIX	+	316705	318161	ORF-T	YIL018W	RPL2B	11610	42	2362	80	10903.5	2515.06	1457	-1.10797	0.330228	-1.84614	0.157845	7.4835	1.72619	4.33528	2.09211	22.6616	10.936	2.0722
1652	ST1652	chrIX	+	315073	316225	ORF-T	YIL019W	FAF1	594	19	67	25	557.852	71.3415	1153	-0.255706	0.774369	-0.658739	0.517503	0.483826	0.0618747	7.81945	1.49636	0.6248	0.119564	5.22566
1651	ST1651	chrIX	+	312817	314049	ORF-T	YIL021W	RPB3	2013	106	1577	39	1890.5	1679.19	1233	1.14012	3.12714	0.877597	2.40511	1.53325	1.36187	1.12584	1.30021	0.490304	0.56624	0.865893
1650	ST1650	chrIX	+	311057	312769	ORF-T	YIL022W	TIM44	2778	56	2224	75	2608.94	2368.11	1713	0.383684	1.46768	0.759804	2.13786	1.52303	1.38244	1.1017	0.68652	1.03771	0.646646	1.60475
1649	ST1649	chrIX	+	301545	303425	other	YIL028W	YIL028W	448	56	650	39	420.737	692.119	1881	-1.08073	0.339347	-0.849995	0.427417	0.223677	0.367953	0.607896	0.793948	0.65914	0.860875	0.765662
1648	ST1648	chrIX	+	292465	295977	ORF-T	YIL031W, YIL030W-A	ULP2, YIL030W-A	1203	47	980	59	1129.79	1043.5	3513	-0.640074	0.527253	-0.577164	0.561489	0.321603	0.29704	1.08269	0.939028	0.609959	0.529023	1.15299
1645	ST1645	chrIX	+	285505	287553	ORF-T	YIL036W	CST6	1030	84	2171	64	967.319	2311.68	2049	0.13988	1.15014	1.0632	2.89562	0.472093	1.1282	0.418448	0.397198	0.410467	0.389622	1.0535
1642	ST1642	chrIX	+	278377	280009	ORF-T	YIL039W	TED1	1109	82	599	88	1041.51	637.815	1633	0.961869	2.61658	0.352793	1.42304	0.63779	0.390579	1.63294	1.83873	0.243749	0.274468	0.888077
1641	ST1641	chrIX	+	277705	278169	ORF-T	YIL040W	APQ12	732	108	414	86	687.454	440.827	465	1.11219	3.041	0.630288	1.87815	1.47839	0.948015	1.55946	1.61915	0.486153	0.504759	0.963139
1640	ST1640	chrIX	+	276505	277633	ORF-T	YIL041W	GVP36	1917	242	1738	70	1800.34	1850.62	1129	1.15182	3.16395	1.71598	5.56214	1.59463	1.63917	0.97283	0.568838	0.504	0.294701	1.71021
1638	ST1638	chrIX	+	270777	272921	ORF-T	YIL045W	PIG2	375	163	1335	147	352.179	1421.51	2145	-0.968724	0.379567	0.905563	2.47332	0.164186	0.662707	0.247751	0.153464	0.432562	0.267942	1.61439
1637	ST1637	chrIX	+	268585	270721	ORF-T	YIL046W	MET30	1089	19	1268	575	1022.73	1350.17	2137	-0.81718	0.441676	0.0875502	1.0915	0.478581	0.631804	0.757484	0.404651	1.08356	0.578842	1.87194
1636	ST1636	chrIX	+	268017	268585	ORF-T	YIL046W-A	YIL046W-A	41	23	65	24	38.5049	69.2119	569	-3.86016	0.0210647	-2.05223	0.128448	0.0676712	0.121638	0.556333	0.163994	3.21254	0.946983	3.3924
1634	ST1634	chrIX	+	261113	264937	ORF-T	YIL048W	NEO1	1005	140	1290	202	943.84	1373.59	3825	-0.356933	0.699819	-0.273207	0.760936	0.246756	0.359109	0.687133	0.919683	0.352599	0.471931	0.747142
1633	ST1633	chrIX	+	260121	260953	ORF-T	YIL049W	DFG10	665	207	536	243	624.531	570.732	833	-0.670621	0.511391	-0.536904	0.584555	0.749737	0.685153	1.09426	0.874838	1.46607	1.17209	1.25082
1632	ST1632	chrIX	+	258537	259889	ORF-T	YIL050W	PCL7	1271	271	1904	191	1193.65	2027.38	1353	0.469177	1.59868	1.55306	4.72591	0.882226	1.49843	0.588767	0.33828	0.551847	0.317067	1.74047
1631	ST1631	chrIX	+	254977	256137	ORF-T	YIL053W	RHR2	14107	480	1869	173	13248.5	1990.11	1161	2.79448	16.3541	2.27909	9.76782	11.4113	1.71413	6.65717	1.67428	0.697765	0.175488	3.97615
1630	ST1630	chrIX	+	249697	252041	ORF-T	YIL056W	VHR1	1379	89	1595	320	1295.08	1698.35	2345	0.235625	1.2657	0.397789	1.48853	0.552273	0.724245	0.76255	0.850302	0.436338	0.486551	0.896799
1628	ST1628	chrIX	+	242001	242777	ORF-T	YIL064W	YIL064W	1052	98	288	128	987.98	306.662	777	0.647433	1.91063	0.462766	1.58846	1.27153	0.394675	3.22172	1.20282	0.665504	0.248463	2.67848
1624	ST1624	chrIX	+	216625	217713	ORF-T	YIL076W	SEC28	1462	86	1143	83	1373.03	1217.07	1089	1.82529	6.20459	1.02302	2.78157	1.26082	1.1176	1.12815	2.23061	0.203207	0.401787	0.505758
1623	ST1623	chrIX	+	212449	214769	ORF-T	YIL078W	THS1	6500	33	1745	83	6104.44	1858.07	2321	2.3099	10.0734	1.35605	3.88084	2.63009	0.800549	3.28536	2.59567	0.261093	0.206282	1.26571
1619	ST1619	chrIX	+	195569	196664	ORF-T	YIL089W	YIL089W	302	186	354	210	283.622	376.939	1096	-2.23822	0.106648	-1.78655	0.167538	0.258779	0.343922	0.752434	0.636562	2.42647	2.0528	1.18203
1618	ST1618	chrIX	+	193425	195369	ORF-T	YIL090W	ICE2	1384	42	895	86	1299.78	952.995	1945	0.278891	1.32166	0.567321	1.76354	0.668265	0.489972	1.36388	0.74944	0.505624	0.277835	1.81987
1617	ST1617	chrIX	+	189001	191097	ORF-T	YIL092W	YIL092W	646	189	324	39	606.687	344.995	2097	-1.66097	0.189954	-1.35553	0.257809	0.289312	0.164518	1.75854	0.7368	1.52306	0.638139	2.38672
1615	ST1615	chrIX	+	183697	186457	ORF-T	YIL095W	PRK1	629	213	782	146	590.722	832.673	2761	-0.473418	0.622869	-0.675843	0.508727	0.213952	0.301584	0.709428	1.22437	0.343494	0.59282	0.579424
1614	ST1614	chrIX	+	180337	182097	ORF-T	YIL097W	FYV10	233	54	781	27	218.821	831.608	1761	-0.740507	0.476872	0.559367	1.74957	0.124259	0.472236	0.263129	0.272566	0.260571	0.269916	0.965379
1612	ST1612	chrIX	+	175257	177441	other	YIL100W	YIL100W	360	79	75	2657	338.092	79.8599	2185	-2.73605	0.0648256	-4.80944	0.00815246	0.154733	0.0365492	4.23356	7.95166	2.38691	4.48321	0.532412
1613	ST1613	chrIX	+	177561	179681	other	YIL100W, YIL099W	YIL100W, SGA1	31	204	317	218	29.1135	337.541	2121	-3.27294	0.037895	-1.31583	0.268251	0.0137263	0.159143	0.0862516	0.141267	0.362219	0.59326	0.610557
1610	ST1610	chrIX	+	171649	173097	ORF-T	YIL103W	DPH1	945	236	150	239	887.491	159.72	1449	0.0720866	1.07475	-0.518922	0.595162	0.612485	0.110228	5.55655	1.80581	0.569887	0.185206	3.07704
1609	ST1609	chrIX	+	166313	167561	ORF-T	YIL106W	MOB1	945	71	940	220	887.491	1000.91	1249	-0.21597	0.80576	0.586701	1.79805	0.710561	0.80137	0.886683	0.448131	0.881853	0.445689	1.97863
1608	ST1608	chrIX	+	160657	163025	ORF-T	YIL108W	YIL108W	1420	34	1415	115	1333.58	1506.69	2369	-0.193079	0.824417	0.0945075	1.09912	0.562932	0.636003	0.885108	0.750072	0.682824	0.578649	1.18003
1607	ST1607	chrIX	+	156001	157337	ORF-T	YIL110W	MNI1	1025	171	372	140	962.623	396.105	1337	1.2303	3.42224	-0.301035	0.740052	0.719987	0.296264	2.43022	4.62433	0.210384	0.400329	0.525529
1606	ST1606	chrIX	+	155145	155849	ORF-T	YIL111W	COX5B	154	601	1436	185	144.628	1529.05	705	1.61373	5.02148	1.48458	4.41309	0.205146	2.16887	0.0945869	1.13786	0.0408537	0.491462	0.0831269
1605	ST1605	chrIX	+	151561	154825	ORF-T	YIL112W	HOS4	1159	109	1198	576	1088.47	1275.63	3265	-0.877839	0.41568	-0.04354	0.957394	0.333375	0.390698	0.853279	0.434179	0.801997	0.408085	1.96527
1604	ST1604	chrIX	+	150529	151249	ORF-T	YIL113W	SDP1	62	134	640	209	58.2269	681.471	721	-0.638391	0.528142	0.0395157	1.04031	0.0807586	0.945175	0.085443	0.507679	0.152911	0.908554	0.168301
1602	ST1602	chrIX	+	142857	144161	ORF-T	YIL116W	HIS5	2153	26	1013	35	2021.98	1078.64	1305	1.61072	5.00641	1.33927	3.81625	1.54941	0.826545	1.87456	1.31187	0.309485	0.216586	1.42892
1601	ST1601	chrIX	+	139617	140569	ORF-T	YIL118W	RHO3	1652	136	949	98	1551.47	1010.49	953	1.75856	5.80406	0.773712	2.1678	1.62798	1.06033	1.53535	2.6774	0.28049	0.489127	0.57345
1599	ST1599	chrIX	+	135249	136185	ORF-T	YIL120W	QDR1	271	975	386	417	254.508	411.012	937	-0.820062	0.440405	0.397866	1.48864	0.27162	0.438647	0.619222	0.295843	0.616752	0.294662	2.09308
1598	ST1598	chrIX	+	132193	133993	ORF-T	YIL121W	QDR2	1581	132	785	334	1484.79	835.867	1801	0.708659	2.03127	-1.56179	0.20976	0.824424	0.464113	1.77634	9.68377	0.405867	2.21259	0.183435
1597	ST1597	chrIX	+	130337	131745	ORF-T	YIL122W	POG1	408	13	809	43	383.171	861.423	1409	-0.54487	0.579917	0.502504	1.65285	0.271945	0.611372	0.444812	0.350858	0.468938	0.369888	1.26778
1596	ST1596	chrIX	+	127457	129889	ORF-T	YIL123W	SIM1	4416	192	3830	619	4147.26	4078.18	2433	1.7137	5.54943	1.43365	4.19397	1.70459	1.67619	1.01694	1.32319	0.307164	0.399667	0.76855
1595	ST1595	chrIX	+	126153	127169	ORF-T	YIL124W	AYR1	1198	564	4019	107	1125.09	4279.43	1017	1.44323	4.23436	1.90729	6.73483	1.10629	4.20789	0.262908	0.628725	0.261265	0.624796	0.41816
1594	ST1594	chrIX	+	122417	125929	ORF-T	YIL125W	KGD1	1344	51	6769	676	1262.21	7207.63	3513	0.79601	2.21668	1.84235	6.31134	0.359297	2.0517	0.175121	0.351222	0.162088	0.325082	0.498607
1593	ST1593	chrIX	+	117809	122201	ORF-T	YIL126W	STH1	2862	26	2144	328	2687.83	2282.93	4393	-0.164687	0.848159	-0.566075	0.56775	0.611844	0.519674	1.17736	1.4939	0.721379	0.915323	0.788114
1592	ST1592	chrIX	+	113729	116993	ORF-T	YIL128W	MET18	1097	166	707	57	1030.24	752.813	3265	-0.503478	0.604425	-0.733799	0.480082	0.315541	0.230571	1.36852	1.259	0.522051	0.480273	1.08699
1591	ST1591	chrIX	+	102657	105753	ORF-T	YIL130W	ASG1	2297	14	1138	32	2157.21	1211.74	3097	-0.24635	0.781648	-0.0433392	0.957586	0.69655	0.391263	1.78026	0.816269	0.891129	0.408593	2.18097
1588	ST1588	chrIX	+	97361	98433	ORF-T	YIL134W	FLX1	1684	595	966	171	1581.52	1028.6	1073	-0.462102	0.629958	-1.59875	0.20215	1.47392	0.958617	1.53755	3.11629	2.33972	4.74211	0.493391
1586	ST1586	chrIX	+	93577	94961	ORF-T	YIL136W	OM45	442	229	8968	104	415.102	9549.12	1385	0.437547	1.5489	2.65991	14.295	0.299712	6.89467	0.0434702	0.108352	0.1935	0.482312	0.401192
1585	ST1585	chrIX	+	85121	87945	ORF-T	YIL141W, YIL140W	YIL141W, AXL2	791	134	669	117	742.863	712.351	2825	-0.213657	0.807626	-0.764348	0.465637	0.26296	0.25216	1.04283	1.73445	0.325597	0.541536	0.601247
1584	ST1584	chrIX	+	83265	84921	ORF-T	YIL142W	CCT2	4404	151	1748	179	4135.99	1861.27	1657	1.51475	4.54829	0.994545	2.70349	2.49607	1.12328	2.22214	1.68237	0.548794	0.415491	1.32083
1583	ST1583	chrIX	+	77985	80249	ORF-T	YIL144W	TID3	929	88	1074	98	872.465	1143.59	2265	-0.493335	0.610587	0.225448	1.25288	0.385194	0.504898	0.762915	0.487345	0.630859	0.402989	1.56545
1581	ST1581	chrIX	+	68433	69601	ORF-T	YIL148W	RPL40A	7689	81	1789	64	7221.08	1904.93	1169	-0.0270209	0.973341	-2.86276	0.0571109	6.17714	1.62953	3.79074	17.043	6.34633	28.5328	0.222422
1580	ST1580	chrIX	+	56481	57377	ORF-T	YIL152W	YIL152W	372	158	548	138	349.362	583.51	897	-0.115393	0.891016	0.814948	2.25906	0.389478	0.650513	0.598724	0.394419	0.437117	0.287957	1.51799
1579	ST1579	chrIX	+	55177	56401	ORF-T	YIL153W	RRD1	876	135	845	161	822.69	899.755	1225	-0.982624	0.374328	-0.273999	0.760333	0.671584	0.734494	0.914349	0.492321	1.79411	0.966017	1.85722
1578	ST1578	chrIX	+	48105	51601	ORF-T	YIL156W	UBP7	630	89	1113	731	591.661	1185.12	3497	-0.770976	0.462561	-0.291582	0.747081	0.169191	0.338897	0.499241	0.619159	0.36577	0.453628	0.806321
1577	ST1577	chrIX	+	47673	48057	other	YIL156W-A, YIL156W-B	YIL156W-A, YIL156W-B	375	101	716	199	352.179	762.396	385	1.00566	2.73372	1.88949	6.61598	0.914751	1.98025	0.461937	0.413199	0.334618	0.299313	1.11795
1576	ST1576	chrIX	+	46193	46889	ORF-T	YIL158W	YIL158W	952	196	1241	447	894.065	1321.42	697	0.102052	1.10744	0.475584	1.60895	1.28273	1.89586	0.676597	0.688299	1.15829	1.17832	0.982997
1575	ST1575	chrIX	+	41793	46025	ORF-T	YIL159W	BNR1	752	241	358	463	706.236	381.198	4233	-2.42762	0.0882464	-2.03937	0.130111	0.166841	0.0900539	1.85268	0.678242	1.89062	0.692134	2.73159
1573	ST1573	chrIX	+	39425	40129	ORF-T	YIL161W	YIL161W	468	4	366	109	439.52	389.716	705	-0.284258	0.752573	0.358126	1.43065	0.623432	0.552789	1.12779	0.526037	0.828401	0.386391	2.14394
1572	ST1572	chrIX	+	37345	39137	ORF-T	YIL162W	SUC2	610	23	5947	38	572.878	6332.36	1793	-0.114788	0.891555	2.18232	8.86688	0.319508	3.53171	0.0904683	0.100549	0.358372	0.398304	0.899745
1568	ST1568	chrIX	+	28889	30361	other	YIL168W, YIL167W	YIL168W, SDL1	241	30	252	32	226.334	268.329	1473	-0.925936	0.396161	-0.680015	0.506609	0.153655	0.182165	0.843492	0.781985	0.38786	0.359577	1.07866
1670	ST1670	chrIX	+	360745	363025	ORF-T	YIR003W	YIR003W	703	225	1140	74	660.218	1213.87	2281	-0.507201	0.602179	0.303561	1.35467	0.289443	0.532166	0.543895	0.444519	0.480659	0.392837	1.22356
1671	ST1671	chrIX	+	363129	364609	ORF-T	YIR004W	DJP1	1086	28	1022	20	1019.91	1088.22	1481	0.785528	2.19356	0.880076	2.41108	0.688664	0.734791	0.937224	0.909784	0.313947	0.304755	1.03016
1672	ST1672	chrIX	+	364849	365497	ORF-T	YIR005W	IST3	321	102	252	168	301.465	268.329	649	0.0217081	1.02195	0.120457	1.12801	0.464507	0.413451	1.12349	0.90597	0.454532	0.36653	1.2401
1673	ST1673	chrIX	+	370689	373089	ORF-T	YIR007W	YIR007W	343	119	562	117	322.126	598.417	2401	-1.72785	0.177665	-1.32066	0.266958	0.134163	0.249237	0.538298	0.665517	0.755148	0.933617	0.808841
1674	ST1674	chrIX	+	374409	375329	ORF-T	YIR009W	MSL1	561	118	400	42	526.86	425.92	921	-0.153298	0.857874	-0.210001	0.810584	0.572052	0.462453	1.23699	1.05834	0.666825	0.570519	1.1688
1675	ST1675	chrIX	+	375345	377417	ORF-T	YIR010W	DSN1	1053	201	929	185	988.919	989.198	2073	-0.680499	0.506364	-0.245511	0.782304	0.477047	0.477182	0.999717	0.647272	0.942103	0.60997	1.54451
1676	ST1676	chrIX	+	378449	379881	ORF-T	YIR012W	SQT1	2746	241	463	96	2578.89	493.002	1433	1.44419	4.2384	-0.0695667	0.932798	1.79964	0.344035	5.23099	4.54375	0.424604	0.36882	1.15125
1677	ST1677	chrIX	+	381057	381921	ORF-T	YIR014W	YIR014W	375	706	986	503	352.179	1049.89	865	-1.53372	0.215732	-0.42052	0.656705	0.407143	1.21375	0.335443	0.328507	1.88726	1.84824	1.02111
1678	ST1678	chrIX	+	381921	383569	other	YIR015W, YIR016W, YIR017W-A	RPR2, YIR016W, YIR017W-A	1140	530	9110	959	1070.62	9700.32	1649	-0.0775587	0.925373	0.945142	2.57318	0.649257	5.88255	0.11037	0.359622	0.701617	2.2861	0.306905
1680	ST1680	chrIX	+	384601	385881	ORF-T	YIR018W	YAP5	599	138	886	174	562.547	943.412	1281	-0.555433	0.573824	0.156517	1.16943	0.439147	0.736465	0.59629	0.490687	0.7653	0.629764	1.21522
1683	ST1683	chrIX	+	397145	398465	ORF-T	YIR021W	MRS1	931	102	500	79	874.343	532.4	1321	-1.23416	0.291078	-1.69779	0.183088	0.66188	0.403028	1.64227	1.58983	2.27389	2.20128	1.03298
1684	ST1684	chrIX	+	398689	399337	other	YIR021W-A, YIR022W	YIR021W-A, SEC11	864	95	1055	80	811.421	1123.36	649	0.938847	2.55703	1.27231	3.56907	1.25026	1.73091	0.722314	0.716442	0.488951	0.484976	1.0082
1685	ST1685	chrIX	+	399729	402753	ORF-T	YIR023W	DAL81	888	46	718	67	833.96	764.526	3025	-0.174066	0.840241	-0.133637	0.874907	0.275689	0.252736	1.09082	0.960377	0.328107	0.288871	1.13582
1686	ST1686	chrIX	+	403585	404993	ORF-T	YIR025W	MND2	459	192	430	28	431.067	457.864	1409	-1.00533	0.365923	-0.227181	0.796777	0.305938	0.324956	0.941475	0.459255	0.836072	0.407839	2.05001
1688	ST1688	chrIX	+	410009	410497	ORF-T	YIR028W	DAL4	36	49	72	97	33.8092	76.6655	489	-3.4758	0.0309371	-2.65673	0.0701773	0.0691395	0.15678	0.440996	0.440842	2.23484	2.23406	1.00035
1689	ST1689	chrIX	+	410673	411841	ORF-T	YIR029W	DAL2	260	25	542	39	244.178	577.121	1169	-2.05443	0.128166	0.179806	1.19699	0.208877	0.493688	0.423096	0.107074	1.62974	0.412443	3.95144
1691	ST1691	chrIX	+	415977	419569	ORF-T	YIR033W	MGA2	1799	51	721	73	1689.52	767.72	3593	0.265188	1.30368	0.538876	1.71408	0.470226	0.213671	2.2007	0.760569	0.360692	0.124656	2.89349
1693	ST1693	chrIX	+	423001	423801	other	YIR036W-A, YIR037W	YIR036W-A, HYR1	722	48	1705	426	678.062	1815.48	801	1.33915	3.81578	2.08138	8.01556	0.84652	2.26652	0.373489	0.476047	0.221847	0.282765	0.784563
5251	ST5251	chrIX	-	44909	45285	CUTs	CUT658	CUT658	2	47	4	21	1.87829	4.2592	377	-5.29247	0.0050293	-5.43169	0.00437571	0.0049822	0.0112976	0.440996	1.14937	0.990633	2.58189	0.383685
5252	ST5252	chrIX	-	45285	45925	CUTs	CUT659	CUT659	217	88	423	47	203.794	450.41	641	-5.13552	0.00588401	-4.93392	0.00719825	0.317932	0.702668	0.452464	0.817422	54.0332	97.6165	0.553525
5254	ST5254	chrIX	-	47573	47949	CUTs	CUT660	CUT660	106	299	213	605	99.5493	226.802	377	-5.1124	0.00602159	-4.90969	0.00737478	0.264056	0.601597	0.438926	0.816512	43.8516	81.575	0.537562
5275	ST5275	chrIX	-	135381	136325	CUTs	CUT661	CUT661	993	271	427	378	932.57	454.669	945	-4.76328	0.00853759	-4.72138	0.0089029	0.986847	0.481131	2.0511	0.958968	115.588	54.0421	2.13886
5291	ST5291	chrIX	-	185941	186173	CUTs	CUT662	CUT662	9	26	10	43	8.4523	10.648	233	-3.05594	0.0470786	-4.61517	0.0099005	0.036276	0.0456995	0.793793	4.75517	0.770541	4.61588	0.166932
5306	ST5306	chrIX	-	226061	226277	CUTs	CUT663	CUT663	21	8	28	9	19.722	29.8144	217	-4.79203	0.00829562	-4.57386	0.0103181	0.0908849	0.137393	0.661494	0.803988	10.9558	13.3158	0.822765
5322	ST5322	chrIX	-	259613	259909	CUTs	CUT664	CUT664	187	124	138	253	175.62	146.942	297	-4.45598	0.0116089	-3.9852	0.0185887	0.591313	0.494755	1.19516	0.624517	50.9361	26.616	1.91374
5323	ST5323	chrIX	-	263533	265053	CUTs	CUT665	CUT665	145	291	124	432	136.176	132.035	1521	-4.47247	0.011419	-5.02263	0.00658716	0.0895305	0.0868081	1.03136	1.73353	7.84045	13.1784	0.594948
5346	ST5346	chrIX	-	342013	342293	CUTs	CUT666	CUT666	4	7	8	5	3.75658	8.51839	281	-3.50607	0.0300147	-3.95242	0.0192082	0.0133686	0.0303146	0.440996	1.5626	0.445402	1.57821	0.282219
5349	ST5349	chrIX	-	349757	350093	CUTs	CUT667	CUT667	247	94	457	78	231.969	486.613	337	-3.53853	0.0290559	-5.12612	0.00593954	0.688334	1.44396	0.4767	4.89194	23.69	243.109	0.097446
5353	ST5353	chrIX	-	362637	362981	CUTs	CUT668	CUT668	154	62	27	119	144.628	28.7496	345	-4.18954	0.0151533	-4.39998	0.0122776	0.419212	0.0833321	5.03062	1.23423	27.6647	6.78735	4.07593
5357	ST5357	chrIX	-	381181	382173	CUTs	CUT669	CUT669	1078	708	829	1070	1012.4	882.719	993	-4.81897	0.00807512	-4.80536	0.00818574	1.01953	0.888941	1.14691	0.986486	126.256	108.596	1.16262
5244	ST5244	chrIX	-	28493	28789	SUTs	SUT601	SUT601	34	61	20	104	31.9309	21.296	297	-2.32093	0.098182	-1.56802	0.208458	0.107511	0.0717036	1.49939	0.470991	1.09502	0.343971	3.18347
5248	ST5248	chrIX	-	35197	36013	SUTs	SUT602	SUT602	151	194	206	93	141.811	219.349	817	-1.44128	0.236625	-0.516958	0.596332	0.173575	0.268481	0.646509	0.396801	0.733544	0.45022	1.6293
5250	ST5250	chrIX	-	44021	44445	SUTs	SUT603	SUT603	10	31	13	9	9.39144	13.8424	425	-4.74199	0.00872128	-4.6127	0.00992495	0.0220975	0.0325703	0.678455	0.878723	2.53375	3.28166	0.772092
5255	ST5255	chrIX	-	49501	49845	SUTs	SUT604	SUT604	1	22	3	49	0.939144	3.1944	345	-4.49567	0.0111572	-4.61436	0.00990855	0.00272216	0.00925912	0.293997	1.12602	0.243982	0.934458	0.261095
5256	ST5256	chrIX	-	51429	51613	SUTs	SUT605	SUT605	19	18	518	20	17.8437	551.566	185	-0.119646	0.887235	3.06125	21.3541	0.0964527	2.98144	0.0323511	0.0415486	0.108712	0.139619	0.778632
5274	ST5274	chrIX	-	132565	135301	SUTs	SUT606	SUT606	313	1005	767	574	293.952	816.701	2737	-2.74945	0.0639633	-1.41107	0.243882	0.107399	0.298393	0.359926	0.262272	1.67908	1.22351	1.37234
5280	ST5280	chrIX	-	150029	151349	SUTs	SUT607	SUT607	174	91	273	683	163.411	290.69	1321	-3.73988	0.023757	-4.0284	0.0178029	0.123703	0.220053	0.562149	1.33445	5.207	12.3606	0.42126
5281	ST5281	chrIX	-	154189	154901	SUTs	SUT608	SUT608	81	132	509	144	76.0707	541.983	713	-1.02862	0.357499	-1.60944	0.199999	0.106691	0.760144	0.140356	1.78751	0.298437	3.80075	0.0785207
5282	ST5282	chrIX	-	154901	155861	SUTs	SUT609	SUT609	629	200	205	1485	590.722	218.284	961	-3.07489	0.0461947	-3.21357	0.0402128	0.614695	0.227142	2.70621	1.14876	13.3066	5.64851	2.35577
5295	ST5295	chrIX	-	195381	196301	SUTs	SUT610	SUT610	206	302	232	268	193.464	247.033	921	-1.77932	0.168753	-0.936088	0.392159	0.210058	0.268223	0.783148	0.430318	1.24477	0.683965	1.81993
5307	ST5307	chrIX	-	226701	228421	SUTs	SUT611	SUT611	67	57	134	200	62.9227	142.683	1721	-2.81796	0.0597279	-3.31596	0.036299	0.0365617	0.0829071	0.440996	1.64544	0.612137	2.284	0.268011
5340	ST5340	chrIX	-	321909	323477	SUTs	SUT612	SUT612	46	3187	81	808	43.2006	86.2487	1569	-4.7635	0.00853568	-4.82045	0.00806319	0.0275339	0.0549705	0.500884	1.0586	3.22574	6.81746	0.473158
5343	ST5343	chrIX	-	333613	334677	SUTs	SUT613	SUT613	62	83	112	63	58.2269	119.258	1065	-4.01455	0.0180511	-2.95897	0.0518723	0.0546732	0.111979	0.488246	0.347991	3.0288	2.15874	1.40304
5365	ST5365	chrIX	-	408333	410213	SUTs	SUT614	SUT614	135	31	329	42	126.784	350.319	1881	-2.9387	0.0529346	-1.34851	0.259626	0.0674027	0.186241	0.361912	0.203888	1.27332	0.717343	1.77505
5373	ST5373	chrIX	-	424549	425365	SUTs	SUT615	SUT615	20	27	49	185	18.7829	52.1752	817	-4.1616	0.0155825	-2.33334	0.0969712	0.0229901	0.0638619	0.359997	0.160692	1.47537	0.658565	2.24028
5374	ST5374	chrIX	-	427341	429437	SUTs	SUT616	SUT616	93	18	191	40	87.3404	203.377	2097	-3.0866	0.0456568	-2.7385	0.0646674	0.0416502	0.0969846	0.429452	0.706025	0.912245	1.49975	0.608267
5350	ST5350	chrIX	-	350445	353621	ORF-T	YIL002C	INP51	594	471	753	369	557.852	801.794	3177	-0.379987	0.683871	-0.623053	0.536305	0.175591	0.252374	0.695755	1.27515	0.25676	0.47058	0.545624
5348	ST5348	chrIX	-	347765	348565	ORF-T	YIL004C	BET1	667	102	685	116	626.409	729.387	801	0.602823	1.82727	0.774679	2.1699	0.782034	0.910596	0.858815	0.842101	0.427979	0.41965	1.01985
5347	ST5347	chrIX	-	342837	343917	ORF-T	YIL007C	NAS2	363	189	667	117	340.909	710.221	1081	-0.282994	0.753524	0.73655	2.08872	0.315365	0.657004	0.480005	0.360759	0.41852	0.314549	1.33054
5344	ST5344	chrIX	-	335517	336245	ORF-T	YIL009C-A	EST3	552	87	283	191	518.408	301.338	729	0.224866	1.25216	-0.479239	0.619254	0.711122	0.413358	1.72035	2.02204	0.567918	0.66751	0.850801
5342	ST5342	chrIX	-	328013	330397	ORF-T	YIL013C	PDR11	413	263	537	300	387.867	571.797	2385	-2.71603	0.066137	-1.38645	0.249961	0.162627	0.239747	0.678329	0.264589	2.45895	0.959138	2.56371
5341	ST5341	chrIX	-	325221	325605	ORF-T	YIL014C-A	YIL014C-A	66	6	140	9	61.9835	149.072	385	-1.50528	0.221956	0.386766	1.47221	0.160996	0.3872	0.415796	0.150763	0.725352	0.263005	2.75794
5339	ST5339	chrIX	-	317901	321109	ORF-T	YIL017C	VID28	635	2771	1626	492	596.357	1731.36	3209	-0.591299	0.553608	0.311599	1.36561	0.185839	0.539534	0.344443	0.405393	0.335687	0.395087	0.849653
5338	ST5338	chrIX	-	313885	314901	ORF-T	YIL020C-A, YIL020C	YIL020C-A, HIS6	431	1074	96	682	404.771	102.221	1017	0.446202	1.56237	-0.798838	0.449851	0.398005	0.100512	3.95978	3.47307	0.254745	0.223434	1.14014
5337	ST5337	chrIX	-	309205	310597	ORF-T	YIL023C	YKE4	1268	13	999	70	1190.83	1063.73	1393	0.720338	2.05513	0.62627	1.87062	0.854871	0.763628	1.11949	1.09863	0.41597	0.408222	1.01898
5336	ST5336	chrIX	-	308485	309205	other	YIL025C, YIL024C	YIL025C, YIL024C	102	2	351	7	95.7927	373.745	721	-1.41252	0.243529	0.584345	1.79382	0.132861	0.51837	0.256305	0.13576	0.545566	0.288976	1.88793
5335	ST5335	chrIX	-	304349	307989	ORF-T	YIL026C	IRR1	718	197	759	165	674.306	808.183	3641	-1.36372	0.255708	-1.16761	0.311108	0.185198	0.221967	0.834348	0.821926	0.724256	0.713473	1.01511
5334	ST5334	chrIX	-	303501	304157	ORF-T	YIL027C	KRE27	935	21	442	31	878.1	470.641	657	1.62462	5.0765	1.2013	3.32444	1.33653	0.716349	1.86575	1.52702	0.263278	0.21548	1.22182
5333	ST5333	chrIX	-	295893	300069	ORF-T	YIL030C	SSM4	3013	52	1127	92	2829.64	1200.03	4177	0.386268	1.47148	-0.0542	0.947243	0.677434	0.287294	2.35798	1.55343	0.460376	0.303295	1.51791
5332	ST5332	chrIX	-	290237	291941	ORF-T	YIL033C	BCY1	1025	446	2335	118	962.623	2486.31	1705	0.974231	2.64913	1.67518	5.33977	0.564588	1.45824	0.38717	0.496112	0.213122	0.273091	0.780408
5331	ST5331	chrIX	-	289165	290117	ORF-T	YIL034C	CAP2	817	393	1343	89	767.281	1430.03	953	1.07008	2.91561	1.43433	4.19682	0.805122	1.50055	0.536551	0.694718	0.276142	0.357545	0.772329
5330	ST5330	chrIX	-	287405	289045	ORF-T	YIL035C	CKA1	1491	89	1045	233	1400.26	1112.72	1641	1.40758	4.08606	0.922138	2.51466	0.853299	0.678071	1.25842	1.6249	0.208832	0.269647	0.774463
5329	ST5329	chrIX	-	283085	284573	ORF-T	YIL037C	PRM2	10	186	41	195	9.39144	43.6568	1489	-4.28545	0.0137675	-3.4508	0.0317202	0.00630721	0.0293195	0.21512	0.434028	0.458125	0.924317	0.495636
5328	ST5328	chrIX	-	280085	282893	ORF-T	YIL038C	NOT3	1961	12	1170	19	1841.66	1245.82	2809	0.499283	1.64754	0.183264	1.20113	0.655629	0.443508	1.47828	1.37166	0.397944	0.369242	1.07773
5327	ST5327	chrIX	-	274949	276341	ORF-T	YIL042C	PKP1	924	135	1622	39	867.769	1727.1	1393	-0.515767	0.597042	0.636299	1.88948	0.62295	1.23985	0.502442	0.315983	1.04339	0.656185	1.59009
5326	ST5326	chrIX	-	273957	274949	ORF-T	YIL043C	CBR1	2328	190	1529	218	2186.33	1628.08	993	2.13741	8.47743	1.94489	6.99286	2.20174	1.63955	1.34289	1.2123	0.259718	0.234461	1.10772
5325	ST5325	chrIX	-	272765	273877	ORF-T	YIL044C	AGE2	928	79	692	120	871.526	736.841	1113	0.440205	1.55303	0.3931	1.48157	0.783042	0.662031	1.18279	1.04823	0.504204	0.446846	1.12836
5324	ST5324	chrIX	-	265053	267853	ORF-T	YIL047C-A, YIL047C	YIL047C-A, SYG1	4712	42	2116	84	4425.25	2253.12	2801	0.741183	2.09842	0.273468	1.31452	1.57988	0.804397	1.96406	1.59634	0.752892	0.611934	1.23035
5321	ST5321	chrIX	-	257605	258349	ORF-T	YIL051C	MMF1	3513	258	3392	597	3299.21	3611.8	745	2.22306	9.23557	2.34276	10.41	4.42847	4.84805	0.913454	0.887184	0.479502	0.465712	1.02961
5320	ST5320	chrIX	-	256037	257149	ORF-T	YIL052C	RPL34B	5671	1063	1354	189	5325.89	1441.74	1113	-1.72885	0.177488	-2.28858	0.101411	4.78516	1.29536	3.69407	1.75019	26.9605	12.7734	2.11067
5319	ST5319	chrIX	-	251941	254421	ORF-T	YIL055C	YIL055C	306	98	1475	558	287.378	1570.58	2481	-1.81886	0.16221	1.02437	2.78534	0.115832	0.633043	0.182976	0.0582372	0.714082	0.227276	3.14191
5318	ST5318	chrIX	-	248389	249077	ORF-T	YIL057C	YIL057C	227	297	2667	339	213.186	2839.82	689	-3.81448	0.0220492	-3.23541	0.0393439	0.309413	4.12165	0.0750702	0.560423	14.0328	104.76	0.133953
5317	ST5317	chrIX	-	247725	248389	ORF-T	YIL057C	YIL057C	18	36	7095	93	16.9046	7554.75	665	-4.12846	0.0161076	2.75804	15.7688	0.0254204	11.3605	0.00223761	0.00102149	1.57816	0.720441	2.19055
5316	ST5316	chrIX	-	244493	245597	ORF-T	YIL061C	SNP1	438	26	256	108	411.345	272.589	1105	-1.23711	0.290222	-0.49666	0.60856	0.372258	0.246687	1.50903	0.4769	1.28266	0.405361	3.16425
5315	ST5315	chrIX	-	243861	244493	ORF-T	YIL062C	ARC15	1885	65	2631	91	1770.29	2801.49	633	1.55485	4.73437	1.91638	6.79629	2.79666	4.42573	0.63191	0.696611	0.590715	0.651198	0.90712
5314	ST5314	chrIX	-	242693	243781	ORF-T	YIL063C	YRB2	817	137	913	46	767.281	972.162	1089	0.810432	2.24888	0.822633	2.27649	0.704574	0.89271	0.789252	0.987873	0.3133	0.392144	0.798941
5313	ST5313	chrIX	-	241189	241821	ORF-T	YIL065C	FIS1	353	20	992	40	331.518	1056.28	633	1.07167	2.92025	1.78596	5.9653	0.523725	1.66869	0.313854	0.489539	0.179343	0.279733	0.641121
5312	ST5312	chrIX	-	235661	237813	ORF-T	YIL067C	YIL067C	664	91	607	55	623.592	646.333	2153	-0.532201	0.587311	-1.13707	0.320756	0.289639	0.300201	0.964815	1.83102	0.49316	0.935917	0.526927
5311	ST5311	chrIX	-	232941	235533	ORF-T	YIL068C	SEC6	925	70	873	30	868.708	929.57	2593	-0.490631	0.61224	-0.29745	0.74271	0.335021	0.358492	0.934528	0.824333	0.547204	0.482681	1.13368
5310	ST5310	chrIX	-	231341	232461	ORF-T	YIL069C	RPS24B	5922	95	1457	44	5561.61	1551.41	1121	-1.22081	0.294991	-1.96989	0.139472	4.9613	1.38395	3.58487	2.11505	16.8185	9.92282	1.69493
5309	ST5309	chrIX	-	230149	231149	ORF-T	YIL070C	MAM33	888	34	1356	108	833.96	1443.87	1001	0.683145	1.9801	1.21518	3.37091	0.833127	1.44243	0.577588	0.587406	0.420751	0.427903	0.983285
5308	ST5308	chrIX	-	228565	230013	ORF-T	YIL071C	PCI8	379	59	658	31	355.936	700.638	1449	-0.299726	0.741021	0.0812281	1.08462	0.245642	0.483532	0.508017	0.683209	0.331492	0.445808	0.743574
5305	ST5305	chrIX	-	222813	224573	ORF-T	YIL073C	SPO22	57	462	121	331	53.5312	128.841	1761	-4.32359	0.0132522	-2.07913	0.125039	0.0303982	0.0731634	0.415484	0.105985	2.29381	0.585122	3.92023
5304	ST5304	chrIX	-	220981	222621	ORF-T	YIL074C	SER33	1382	383	544	261	1297.9	579.251	1641	0.647609	1.91097	-0.108243	0.897409	0.790919	0.352986	2.24065	2.12943	0.413884	0.393339	1.05223
5303	ST5303	chrIX	-	217741	220757	ORF-T	YIL075C	RPN2	5137	64	3564	54	4824.38	3794.94	3017	1.55689	4.74407	1.14992	3.15794	1.59907	1.25785	1.27127	1.50227	0.337067	0.398315	0.846232
5302	ST5302	chrIX	-	214773	216533	ORF-T	YIL077C	YIL077C	1225	353	2688	141	1150.45	2862.18	1761	-0.24626	0.781719	0.762467	2.14356	0.653295	1.62532	0.401949	0.364683	0.835715	0.758232	1.10219
5301	ST5301	chrIX	-	210805	212045	ORF-T	YIL079C	AIR1	1751	84	292	57	1644.44	310.921	1241	-0.678162	0.507549	-1.70732	0.181351	1.32509	0.250541	5.28893	2.79872	2.61077	1.38153	1.88977
5300	ST5300	chrIX	-	203509	204989	ORF-T	YIL083C	YIL083C	900	302	815	181	845.23	867.811	1481	-0.0983745	0.906309	0.830225	2.29383	0.570716	0.585963	0.973979	0.395107	0.629714	0.255451	2.4651
5299	ST5299	chrIX	-	202093	203301	ORF-T	YIL084C	SDS3	1150	737	934	232	1080.02	994.522	1209	-0.805899	0.446686	-0.391316	0.676166	0.893313	0.822599	1.08596	0.660616	1.99987	1.21656	1.64387
5298	ST5298	chrIX	-	200397	202053	other	YIL086C, YIL085C	YIL086C, KTR7	1227	22	684	291	1152.33	728.323	1657	0.227221	1.25511	0.0928793	1.09733	0.695431	0.439543	1.58217	1.14378	0.554082	0.400557	1.38328
5297	ST5297	chrIX	-	199581	200189	other	YIL087C, YIL086C	YIL087C, YIL086C	161	140	997	219	151.202	1061.6	609	-0.584082	0.557617	1.53604	4.64616	0.24828	1.74319	0.142428	0.120017	0.445251	0.37519	1.18673
5296	ST5296	chrIX	-	197861	199477	ORF-T	YIL088C	AVT7	941	34	2039	30	883.735	2171.13	1617	1.32157	3.7493	1.61814	5.04368	0.546527	1.34269	0.40704	0.743366	0.145768	0.266212	0.547563
5294	ST5294	chrIX	-	190933	193237	ORF-T	YIL091C	YIL091C	1984	63	361	42	1863.26	384.392	2305	-0.149465	0.861168	-0.729324	0.482235	0.808357	0.166765	4.84729	1.78579	0.938674	0.345816	2.71437
5293	ST5293	chrIX	-	187885	188869	ORF-T	YIL093C	RSM25	717	617	689	386	673.366	733.647	985	0.301968	1.35252	0.668564	1.95143	0.683621	0.744819	0.917835	0.693089	0.505443	0.381678	1.32427
5292	ST5292	chrIX	-	186173	187709	ORF-T	YIL094C	LYS12	2184	56	1301	96	2051.09	1385.3	1537	1.50896	4.52203	1.20703	3.34353	1.33448	0.901304	1.48061	1.35247	0.295106	0.269566	1.09474
5290	ST5290	chrIX	-	181981	183237	ORF-T	YIL096C	YIL096C	504	35	53	72	473.329	56.4344	1257	-0.350119	0.704604	-0.93597	0.392205	0.376554	0.0448961	8.38724	1.79652	0.53442	0.114471	4.66861
5289	ST5289	chrIX	-	179701	180277	ORF-T	YIL098C	FMC1	323	18	523	47	303.344	556.89	577	-0.296746	0.743232	0.541511	1.7186	0.525725	0.965147	0.54471	0.432463	0.70735	0.561589	1.25955
5288	ST5288	chrIX	-	175213	177437	other	YIL101C, YIL100C-A	XBP1, YIL100C-A	79	370	2697	76	74.1924	2871.76	2225	-1.7385	0.175784	1.08477	2.95877	0.0333449	1.29068	0.0258351	0.059411	0.189693	0.436221	0.434855
5287	ST5287	chrIX	-	172213	173645	ORF-T	YIL102C-A	YIL102C-A	636	605	561	125	597.296	597.352	1433	-0.997054	0.368965	-0.410813	0.663111	0.416815	0.416854	0.999905	0.556415	1.12969	0.628634	1.79705
5286	ST5286	chrIX	-	169877	171533	ORF-T	YIL104C	SHQ1	884	13	253	88	830.204	269.394	1657	-0.971087	0.378671	-1.40084	0.24639	0.501028	0.162579	3.08174	1.53688	1.32312	0.659847	2.00519
5285	ST5285	chrIX	-	167421	169805	ORF-T	YIL105C	SLM1	933	190	1830	161	876.222	1948.58	2385	0.3309	1.39222	1.20912	3.35054	0.367389	0.817016	0.449671	0.415521	0.263887	0.243846	1.08219
5284	ST5284	chrIX	-	163165	165957	ORF-T	YIL107C	PFK26	508	105	3154	51	477.085	3358.38	2793	-0.549852	0.577035	1.16278	3.19883	0.170815	1.20243	0.142058	0.180389	0.296021	0.375896	0.787509
5283	ST5283	chrIX	-	157229	160277	ORF-T	YIL109C	SEC24	2609	84	2179	59	2450.23	2320.2	3049	1.33304	3.79257	0.926128	2.52471	0.803617	0.76097	1.05604	1.50218	0.211892	0.301408	0.703007
5279	ST5279	chrIX	-	149013	150029	ORF-T	YIL114C	POR2	765	209	946	147	718.445	1007.3	1017	0.643848	1.90379	-0.691767	0.500691	0.706436	0.990462	0.713239	3.80233	0.371068	1.97819	0.187579
5278	ST5278	chrIX	-	144197	148885	ORF-T	YIL115C	NUP159	1717	110	1545	109	1612.51	1645.11	4689	-0.41828	0.658178	-0.218817	0.803469	0.343892	0.350846	0.980181	0.81917	0.522491	0.436663	1.19655
5277	ST5277	chrIX	-	140533	141693	ORF-T	YIL117C	PRM5	1598	161	721	158	1500.75	767.72	1161	1.09314	2.98362	0.10869	1.11482	1.29264	0.661258	1.95482	2.67633	0.433245	0.593154	0.730409
5276	ST5276	chrIX	-	136325	138061	ORF-T	YIL119C	RPI1	1410	362	550	122	1324.19	585.64	1737	0.678575	1.97107	-0.421863	0.655824	0.762345	0.337156	2.26111	3.00548	0.386768	0.514095	0.752328
5273	ST5273	chrIX	-	116941	117677	ORF-T	YIL127C	YIL127C	699	103	130	89	656.462	138.424	737	0.484204	1.62288	-0.0671192	0.935084	0.890722	0.187821	4.7424	1.73555	0.548851	0.20086	2.73251
5272	ST5272	chrIX	-	106013	113341	ORF-T	YIL129C	TAO3	2046	36	2173	78	1921.49	2313.81	7329	-0.766659	0.464562	-0.61976	0.538073	0.262176	0.315706	0.830444	0.863381	0.564351	0.586734	0.961851
5271	ST5271	chrIX	-	100653	102341	ORF-T	YIL131C	FKH1	759	68	596	110	712.81	634.62	1689	-0.390123	0.676974	-0.330371	0.718657	0.422031	0.375737	1.12321	0.941998	0.623409	0.522832	1.19237
5270	ST5270	chrIX	-	99453	100517	ORF-T	YIL132C	CSM2	177	144	159	117	166.229	169.303	1065	-2.25669	0.104697	-2.20693	0.110038	0.156083	0.15897	0.98184	0.951456	1.49081	1.44468	1.03193
5269	ST5269	chrIX	-	98413	99453	ORF-T	YIL133C	RPL16A	8918	54	1972	49	8375.29	2099.78	1041	2.3944	10.9616	1.81943	6.16836	8.04543	2.01708	3.98864	1.77707	0.733963	0.327005	2.2445
5268	ST5268	chrIX	-	94893	96453	ORF-T	YIL135C	VHS2	861	40	1042	547	808.603	1109.52	1561	0.467885	1.59661	0.899611	2.45865	0.518003	0.710776	0.728786	0.649387	0.324439	0.289092	1.12227
5267	ST5267	chrIX	-	89885	92829	ORF-T	YIL137C	TMA108	1210	27	1116	51	1136.36	1188.32	2945	-0.114046	0.892217	0.117903	1.12514	0.385862	0.403503	0.956282	0.792987	0.432476	0.358626	1.20592
5266	ST5266	chrIX	-	88885	89741	ORF-T	YIL138C	TPM2	911	124	941	66	855.56	1001.98	857	1.63526	5.13077	1.58502	4.87938	0.99832	1.16917	0.853873	1.05152	0.194575	0.239614	0.812037
5265	ST5265	chrIX	-	87869	88733	ORF-T	YIL139C	REV7	282	122	191	83	264.839	203.377	865	-0.135472	0.873303	-0.452814	0.635836	0.306172	0.235118	1.30221	1.37347	0.350591	0.369777	0.948114
5264	ST5264	chrIX	-	80165	83077	ORF-T	YIL143C	SSL2	2232	97	1488	145	2096.17	1584.42	2913	-0.0749841	0.927758	0.288897	1.33495	0.719591	0.543914	1.32299	0.694973	0.775624	0.40744	1.90365
5263	ST5263	chrIX	-	76037	77349	ORF-T	YIL145C	PAN6	2516	159	657	666	2362.89	699.573	1313	0.704857	2.02356	-0.375526	0.686928	1.79961	0.532805	3.37761	2.94581	0.889329	0.775635	1.14658
5262	ST5262	chrIX	-	73973	76037	ORF-T	YIL146C	ECM37	263	66	488	63	246.995	519.622	2065	-1.47345	0.229134	0.0685855	1.07099	0.11961	0.251633	0.475336	0.213945	0.52201	0.234953	2.22176
5261	ST5261	chrIX	-	69525	73677	ORF-T	YIL147C	SLN1	1453	1913	1034	418	1364.58	1101	4153	-0.29174	0.746963	-0.448508	0.63858	0.328576	0.26511	1.23939	1.16972	0.439883	0.415155	1.05956
5260	ST5260	chrIX	-	62909	68205	ORF-T	YIL149C	MLP2	1600	53	1254	56	1502.63	1335.26	5297	-0.804283	0.447409	-0.348266	0.705911	0.283676	0.252078	1.12535	0.633803	0.634042	0.357096	1.77555
5259	ST5259	chrIX	-	57349	62757	other	YIL151C, YIL150C	YIL151C, MCM10	1565	91	1234	191	1469.76	1313.96	5409	-0.686286	0.503442	-0.564332	0.56874	0.271725	0.242921	1.11857	0.885189	0.539734	0.427122	1.26365
5258	ST5258	chrIX	-	53917	55069	ORF-T	YIL154C	IMP2'	722	287	1333	2187	678.062	1419.38	1153	1.05998	2.88631	1.18218	3.26146	0.588085	1.23103	0.477718	0.884976	0.20375	0.377447	0.539809
5257	ST5257	chrIX	-	51725	53741	ORF-T	YIL155C	GUT2	441	43	9549	44	414.163	10167.8	2017	-1.14327	0.318774	2.10936	8.24293	0.205336	5.04103	0.0407329	0.0386724	0.644143	0.611559	1.05328
5253	ST5253	chrIX	-	46749	47573	ORF-T	YIL157C	COA1	665	290	1561	354	624.531	1662.15	825	0.945489	2.57407	1.613	5.01784	0.757007	2.01473	0.375736	0.512984	0.294089	0.401513	0.732452
5249	ST5249	chrIX	-	40205	41981	ORF-T	YIL160C	POT1	5	338	1402	273	4.69572	1492.85	1777	-4.7857	0.00834828	1.99398	7.34473	0.0026425	0.840095	0.00314548	0.00113663	0.316532	0.114381	2.76736
5247	ST5247	chrIX	-	33549	35005	other	YIL165C, YIL164C	YIL165C, NIT1	664	16	675	36	623.592	718.739	1457	-0.220955	0.801753	-0.0706469	0.931791	0.427997	0.493301	0.867619	0.860443	0.533827	0.529412	1.00834
5245	ST5245	chrIX	-	30389	31333	ORF-T	YIL166C	YIL166C	275	136	177	51	258.265	188.469	945	-1.08956	0.336366	-0.730294	0.481767	0.273296	0.199439	1.37033	0.698191	0.812496	0.413973	1.96268
5246	ST5246	chrIX	-	31333	32965	ORF-T	YIL166C	YIL166C	46	212	35	258	43.2006	37.268	1633	-3.83729	0.021552	-3.5324	0.0292347	0.0264548	0.0228218	1.15919	0.737206	1.22748	0.780639	1.57241
5345	ST5345	chrIX	-	336677	338613	other	YILCdelta5	YILCdelta5	571	290	719	279	536.251	765.591	1937	-3.35002	0.0350837	-2.33315	0.0969893	0.276846	0.395246	0.700441	0.361727	7.89103	4.07515	1.93638
5351	ST5351	chrIX	-	355805	357173	ORF-T	YIR001C	SGN1	380	84	523	59	356.875	556.89	1369	-0.185841	0.830406	0.739978	2.09589	0.260683	0.406786	0.640835	0.396207	0.313922	0.194087	1.61743
5352	ST5352	chrIX	-	357317	360701	ORF-T	YIR002C	MPH1	862	134	882	187	809.542	939.153	3385	-0.513937	0.598136	-0.196672	0.82146	0.239156	0.277445	0.861992	0.728138	0.399835	0.337747	1.18383
5354	ST5354	chrIX	-	365381	370077	ORF-T	YIR006C	PAN1	2641	92	2901	125	2480.28	3088.98	4697	0.690131	1.99398	0.79776	2.22056	0.528056	0.65765	0.802944	0.897961	0.264826	0.296164	0.894186
5355	ST5355	chrIX	-	372909	374389	ORF-T	YIR008C	PRI1	842	30	594	78	790.759	632.491	1481	0.0334329	1.034	-0.0150125	0.9851	0.533936	0.42707	1.25023	1.04964	0.51638	0.43353	1.19111
5356	ST5356	chrIX	-	377149	378381	ORF-T	YIR011C	STS1	1530	113	1173	118	1436.89	1249.01	1233	1.13145	3.10014	1.42677	4.16521	1.16536	1.01298	1.15042	0.744294	0.375906	0.243201	1.54566
5358	ST5358	chrIX	-	383277	384421	ORF-T	YIR017C	MET28	218	240	757	1939	204.733	806.053	1145	-1.93558	0.144341	0.329616	1.39043	0.178807	0.703976	0.253995	0.10381	1.23878	0.5063	2.44674
5359	ST5359	chrIX	-	385605	386517	ORF-T	YIR018C-A	YIR018C-A	620	98	412	134	582.269	438.697	913	-1.38008	0.251559	-1.55266	0.211684	0.637754	0.480501	1.32727	1.18837	2.5352	2.2699	1.11688
5360	ST5360	chrIX	-	389349	392925	ORF-T	YIR019C	MUC1	52	269	81	126	48.8355	86.2487	3577	-3.36876	0.0344323	-2.4207	0.0888593	0.0136526	0.024112	0.566217	0.387492	0.396507	0.271351	1.46124
5361	ST5361	chrIX	-	393637	397101	other	YIR019C, YIR020C	MUC1, YIR020C	575	23	751	46	540.008	799.664	3465	-1.59475	0.20296	-1.75219	0.173395	0.155846	0.230783	0.675293	1.17051	0.767868	1.33097	0.576923
5362	ST5362	chrIX	-	402653	403541	other	YIR023C-A, YIR024C	YIR023C-A, YIR024C	414	119	405	103	388.806	431.244	889	-0.466205	0.627378	0.044094	1.04508	0.437352	0.485088	0.901592	0.600316	0.69711	0.464164	1.50186
5363	ST5363	chrIX	-	404701	406053	ORF-T	YIR026C	YVH1	858	112	105	132	805.786	111.804	1353	0.52439	1.68943	-0.419088	0.657647	0.595555	0.0826341	7.20713	2.5689	0.352519	0.125651	2.80553
5364	ST5364	chrIX	-	406181	406837	ORF-T	YIR027C	DAL1	19	39	35	47	17.8437	37.268	657	-4.13718	0.0159679	-2.80772	0.0603423	0.0271594	0.0567245	0.478796	0.264622	1.70088	0.940044	1.80936
5366	ST5366	chrIX	-	411885	412813	ORF-T	YIR030C	DCG1	88	42	179	65	82.6447	190.599	929	-2.30275	0.0999839	-2.17005	0.114172	0.0889609	0.205166	0.433605	0.875729	0.889752	1.79699	0.495136
5367	ST5367	chrIX	-	412925	414813	ORF-T	YIR031C	DAL7	886	12	791	35	832.082	842.256	1889	-0.651022	0.521513	-0.729845	0.481983	0.440488	0.445874	0.98792	1.08201	0.844635	0.925082	0.913039
5368	ST5368	chrIX	-	414893	415765	ORF-T	YIR032C	DAL3	60	175	447	277	56.3487	475.965	873	-2.08022	0.124902	-0.88385	0.413189	0.064546	0.545206	0.118388	0.302288	0.516773	1.31951	0.39164
5369	ST5369	chrIX	-	419437	420805	ORF-T	YIR034C	LYS1	532	163	543	101	499.625	578.186	1369	0.0398722	1.04068	-0.0208323	0.979383	0.364956	0.422342	0.864125	1.06258	0.350691	0.431232	0.813229
5370	ST5370	chrIX	-	420909	421845	ORF-T	YIR035C	YIR035C	917	34	584	51	861.195	621.843	937	1.69081	5.42389	0.564863	1.75921	0.919098	0.663653	1.38491	3.08314	0.169454	0.377245	0.449187
5371	ST5371	chrIX	-	421869	422957	ORF-T	YIR036C	IRC24	672	22	1776	32	631.105	1891.08	1089	-0.333897	0.716128	1.34415	3.83493	0.579527	1.73653	0.333727	0.186738	0.809251	0.45282	1.78714
5372	ST5372	chrIX	-	423629	424549	ORF-T	YIR038C	GTT1	241	184	1657	552	226.334	1764.37	921	0.523291	1.68757	2.53095	12.5655	0.245748	1.91571	0.12828	0.134302	0.145622	0.152459	0.955159
5375	ST5375	chrIX	-	430341	432349	ORF-T	YIR039C	YPS6	42	14	398	19	39.4441	423.79	2009	-1.06789	0.343732	0.441793	1.55549	0.0196337	0.210946	0.0930745	0.220979	0.0571191	0.135613	0.421191
5376	ST5376	chrIX	-	434717	436061	ORF-T	YIR042C	YIR042C	280	33	517	20	262.96	550.501	1345	-0.692464	0.500341	-0.390394	0.67679	0.19551	0.409295	0.477675	0.739286	0.390752	0.604758	0.64613
5377	ST5377	chrIX	-	436717	437949	other	YIR043C	YIR043C	34	16	13	12	31.9309	13.8424	1233	-2.31692	0.0985763	-4.07012	0.0170754	0.0258969	0.0112266	2.30675	5.77301	0.262709	0.657473	0.399574
805	ST0805	chrV	+	8089	8297	CUTs	CUT102	CUT102	13	3	163	9	12.2089	173.562	209	-4.1865	0.0151994	-2.63169	0.0719565	0.0584157	0.830441	0.0703429	0.211231	3.84328	11.5409	0.333014
806	ST0806	chrV	+	9969	10497	CUTs	CUT103	CUT103	187	15	295	29	175.62	314.116	529	-4.53301	0.0107483	-4.70705	0.00903134	0.331985	0.593792	0.559093	1.19011	30.8872	65.7479	0.469782
812	ST0812	chrV	+	34145	34321	CUTs	CUT104	CUT104	39	18	54	47	36.6266	57.4992	177	-4.60555	0.00999616	-4.42843	0.0119332	0.20693	0.324854	0.636994	0.837677	20.701	27.2227	0.76043
815	ST0815	chrV	+	45065	45809	CUTs	CUT105	CUT105	341	25	144	910	320.248	153.331	745	-4.22425	0.0146363	-4.69193	0.00916895	0.429863	0.205814	2.08861	1.59629	29.3697	22.4468	1.30841
850	ST0850	chrV	+	150289	151761	CUTs	CUT106	CUT106	224	1573	299	937	210.368	318.375	1473	-3.43356	0.0322718	-2.6244	0.0724833	0.142816	0.21614	0.660756	0.44523	4.42542	2.98193	1.48408
873	ST0873	chrV	+	208761	209065	CUTs	CUT107	CUT107	33	99	133	137	30.9918	141.618	305	-4.94613	0.00711086	-4.01675	0.0180114	0.101612	0.464322	0.21884	0.394798	14.2897	25.7794	0.554308
874	ST0874	chrV	+	210489	210833	CUTs	CUT108	CUT108	233	67	221	56	218.821	235.321	345	-3.5262	0.0294165	-4.1102	0.0164044	0.634263	0.682089	0.929883	1.79321	21.5614	41.5795	0.518559
883	ST0883	chrV	+	238649	239161	CUTs	CUT109	CUT109	497	40	218	28	466.755	232.126	513	-5.06842	0.00629236	-5.16778	0.00569721	0.909853	0.452488	2.01078	1.10446	144.597	79.4227	1.8206
888	ST0888	chrV	+	261953	262801	CUTs	CUT110	CUT110	291	27	218	923	273.291	232.126	849	-3.99858	0.0183417	-4.78537	0.00835104	0.321897	0.273411	1.17734	2.19634	17.55	32.7398	0.536046
906	ST0906	chrV	+	316769	317145	CUTs	CUT111	CUT111	334	53	65	68	313.674	69.2119	377	-4.877	0.00761984	-4.88264	0.00757697	0.832027	0.183586	4.53208	1.00566	109.192	24.2295	4.50659
910	ST0910	chrV	+	326169	326545	CUTs	CUT112	CUT112	453	304	70	277	425.432	74.5359	377	-4.94423	0.0071244	-5.06392	0.00632076	1.12847	0.197708	5.70775	1.12714	158.395	31.2792	5.06391
916	ST0916	chrV	+	343481	343889	CUTs	CUT113	CUT113	317	55	239	43	297.709	254.487	409	-3.51958	0.029612	-4.47258	0.0114178	0.727894	0.622218	1.16984	2.5935	24.5811	54.4955	0.451066
917	ST0917	chrV	+	347777	348481	CUTs	CUT114	CUT114	576	299	354	439	540.947	376.939	705	-4.69381	0.00915176	-4.56431	0.0104171	0.767301	0.534665	1.43511	0.878533	83.8419	51.3258	1.63353
927	ST0927	chrV	+	395281	395513	CUTs	CUT115	CUT115	167	74	21	86	156.837	22.3608	233	-5.22891	0.00535938	-5.02661	0.00656099	0.673121	0.095969	7.01394	0.816855	125.597	14.6272	8.58651
936	ST0936	chrV	+	422185	422609	CUTs	CUT116	CUT116	230	784	205	316	216.003	218.284	425	-4.95945	0.00701681	-4.89935	0.00745141	0.508243	0.513609	0.989552	0.941676	72.4322	68.9278	1.05084
939	ST0939	chrV	+	425233	425529	CUTs	CUT117	CUT117	164	40	70	39	154.02	74.5359	297	-5.00015	0.00673691	-4.9413	0.0071453	0.518585	0.250963	2.06638	0.942844	76.9767	35.1228	2.19165
950	ST0950	chrV	+	483313	484513	CUTs	CUT118	CUT118	783	2293	299	473	735.35	318.375	1201	-4.58775	0.0101757	-4.75675	0.00859351	0.612281	0.265092	2.3097	1.18412	60.1709	30.8479	1.95057
953	ST0953	chrV	+	500633	501329	CUTs	CUT119	CUT119	292	71	59	185	274.23	62.8232	697	-4.36845	0.0126708	-4.60134	0.0100384	0.393443	0.0901336	4.36511	1.26224	31.0511	8.97893	3.45822
942	ST0942	chrV	+	441993	442497	other	SCR1	SCR1	33405	8	57776	20	31372.1	61519.8	505	1.72119	5.59118	1.67248	5.32535	62.123	121.821	0.509951	1.04992	11.1109	22.8758	0.485706
938	ST0938	chrV	+	424705	424849	other	snR4	SNR4	4892	20	3542	20	4594.29	3771.52	145	1.73147	5.64895	1.25532	3.50895	31.6848	26.0105	1.21815	1.60987	5.60897	7.41261	0.756679
819	ST0819	chrV	+	61329	61401	other	snR67	SNR67	2056	14	1112	5	1930.88	1184.06	73	-0.0621407	0.939751	-1.66568	0.189062	26.4504	16.22	1.63073	4.97061	28.1462	85.7919	0.328075
909	ST0909	chrV	+	322217	324201	ORF-T	SRG1, YER081W	SRG1, SER3	8553	90	5158	43	8032.5	5492.23	1985	0.628464	1.87473	1.37244	3.94495	4.0466	2.76687	1.46252	0.475222	2.1585	0.70137	3.07755
804	ST0804	chrV	+	7713	8089	SUTs	SUT086	SUT086	6	4	219	15	5.63487	233.191	377	-2.78747	0.061577	-2.83957	0.058451	0.0149466	0.618544	0.0241642	1.05348	0.24273	10.5823	0.0229374
807	ST0807	chrV	+	11545	11929	SUTs	SUT087	SUT087	15	9	40	40	14.0872	42.592	385	-3.76782	0.0231025	-3.4676	0.0311919	0.03659	0.110628	0.330747	0.740657	1.58381	3.54671	0.446559
838	ST0838	chrV	+	118097	118673	SUTs	SUT088	SUT088	23	62	258	99	21.6003	274.718	577	-2.67563	0.0688635	-0.0799433	0.923169	0.0374356	0.476115	0.0786272	0.0745947	0.543619	0.51574	1.05406
858	ST0858	chrV	+	173473	173769	SUTs	SUT089	SUT089	26	5	34	5	24.4178	36.2032	297	-1.48921	0.225551	-1.31519	0.268424	0.0822146	0.121896	0.674464	0.84028	0.364506	0.454118	0.802666
865	ST0865	chrV	+	191977	192681	SUTs	SUT090	SUT090	251	1107	172	894	235.725	183.145	705	-4.27873	0.0138603	-3.98696	0.0185561	0.334362	0.259781	1.28709	0.74694	24.1237	13.9998	1.72315
889	ST0889	chrV	+	268857	269425	SUTs	SUT091	SUT091	1300	1782	1164	355	1220.89	1239.43	569	0.458671	1.58197	0.690995	1.9957	2.14567	2.17825	0.985043	0.792689	1.35633	1.09147	1.24266
890	ST0890	chrV	+	270689	271569	SUTs	SUT092	SUT092	515	706	134	971	483.659	142.683	881	-2.1305	0.118778	-4.22321	0.0146515	0.548989	0.161956	3.38974	8.10687	4.62199	11.0539	0.418132
895	ST0895	chrV	+	284417	287441	SUTs	SUT093	SUT093	1425	656	1761	1244	1338.28	1875.11	3025	-2.88824	0.0556741	-2.34498	0.0958492	0.442407	0.619872	0.713707	0.580851	7.94636	6.46715	1.22873
905	ST0905	chrV	+	309001	309041	SUTs	SUT094	SUT094	0	9	0	9	0	0	41	-5.04829	0.00642032	-3.7574	0.0233445	0	0	#DIV/0!	0.275025	0	0	#DIV/0!
913	ST0913	chrV	+	335585	335729	SUTs	SUT095	SUT095	21	107	21	164	19.722	22.3608	145	-2.90406	0.0548004	-3.67091	0.0254533	0.136014	0.154212	0.881992	2.15298	2.48199	6.05864	0.409661
925	ST0925	chrV	+	377945	378705	SUTs	SUT096	SUT096	214	358	125	88	200.977	133.1	761	-2.97287	0.051156	-3.75562	0.0233859	0.264096	0.174901	1.50997	2.18748	5.16255	7.47894	0.690279
952	ST0952	chrV	+	489921	491257	SUTs	SUT097	SUT097	153	546	507	559	143.689	539.853	1337	-3.48733	0.0305823	-0.514328	0.597902	0.107471	0.403779	0.266163	0.0511494	3.51416	0.675327	5.20364
954	ST0954	chrV	+	504001	504945	SUTs	SUT098	SUT098	3735	39	2845	22	3507.7	3029.35	945	-1.05521	0.348119	-1.31273	0.269085	3.71186	3.20567	1.15791	1.29372	10.6626	11.9132	0.895023
968	ST0968	chrV	+	554129	556025	SUTs	SUT099	SUT099	630	65	490	66	591.661	521.752	1897	-1.4973	0.223734	-1.05272	0.348988	0.311893	0.27504	1.13399	0.641094	1.39403	0.788108	1.76884
970	ST0970	chrV	+	562945	564457	SUTs	SUT100	SUT100	194	13	638	45	182.194	679.342	1513	-5.11659	0.00599646	-3.27433	0.0378423	0.120419	0.449003	0.268192	0.158459	20.0817	11.8651	1.6925
849	ST0849	chrV	+	148121	148705	ORF-T	YEL003W	GIM4	779	119	281	110	731.593	299.209	585	1.1272	3.08701	0.539513	1.71517	1.25059	0.511468	2.44509	1.79983	0.405112	0.298202	1.35852
848	ST0848	chrV	+	146905	148121	ORF-T	YEL004W	YEA4	455	178	534	110	427.311	568.603	1217	-0.749056	0.472813	-0.59368	0.552291	0.351118	0.467217	0.75151	0.856093	0.742615	0.845961	0.877837
847	ST0847	chrV	+	144281	145681	ORF-T	YEL006W	YEA6	1149	27	894	31	1079.08	951.93	1401	0.396158	1.4861	0.528427	1.69626	0.770219	0.679465	1.13357	0.876106	0.51828	0.400566	1.29387
846	ST0846	chrV	+	141497	144033	ORF-T	YEL007W	YEL007W	2081	49	1511	74	1954.36	1608.91	2537	0.882748	2.41753	0.343131	1.40935	0.770343	0.634179	1.21471	1.71535	0.318648	0.449979	0.708141
844	ST0844	chrV	+	133089	135313	ORF-T	YEL011W	GLC3	253	740	10353	54	237.603	11023.9	2225	-0.387062	0.679049	1.8316	6.24388	0.106788	4.95455	0.0215536	0.108754	0.157261	0.793504	0.198186
843	ST0843	chrV	+	131641	132657	ORF-T	YEL012W	UBC8	257	23	1815	577	241.36	1932.61	1017	0.245672	1.27848	1.80356	6.07123	0.237326	1.90031	0.124888	0.21058	0.185631	0.313002	0.593067
842	ST0842	chrV	+	128585	130945	ORF-T	YEL013W	VAC8	2338	15	2676	86	2195.72	2849.4	2361	0.876409	2.40226	0.572046	1.77189	0.929995	1.20686	0.770589	1.35576	0.387134	0.681116	0.568381
841	ST0841	chrV	+	126593	128417	ORF-T	YEL015W	EDC3	1691	34	1191	31	1588.09	1268.18	1825	0.799557	2.22456	0.651832	1.91905	0.870188	0.694891	1.25227	1.15919	0.391174	0.362101	1.08029
840	ST0840	chrV	+	123193	124721	ORF-T	YEL017W	GTT3	1125	117	1220	102	1056.54	1299.05	1529	0.376218	1.45676	-0.0460768	0.954969	0.690999	0.849611	0.813312	1.52546	0.474338	0.889674	0.533159
839	ST0839	chrV	+	121449	122385	ORF-T	YEL018W	EAF5	667	1019	461	458	626.409	490.872	937	-0.179119	0.836006	0.183964	1.20197	0.668526	0.523877	1.27611	0.695529	0.799667	0.435848	1.83474
837	ST0837	chrV	+	117145	117577	ORF-T	YEL020W-A	TIM9	750	448	719	493	704.358	765.591	433	1.26933	3.55848	1.81215	6.12359	1.62669	1.76811	0.920019	0.58111	0.457132	0.288737	1.58321
836	ST0836	chrV	+	116121	117049	ORF-T	YEL021W	URA3	2	6	4	3	1.87829	4.2592	929	-5.20271	0.00550162	-4.9788	0.00688234	0.00202184	0.00458471	0.440996	0.799383	0.367499	0.666156	0.55167
835	ST0835	chrV	+	111337	115873	ORF-T	YEL022W	GEA2	1751	56	997	63	1644.44	1061.6	4537	-0.0108096	0.989249	-1.03974	0.353548	0.362451	0.233988	1.54901	2.79806	0.366391	0.661829	0.553603
834	ST0834	chrV	+	107161	108425	ORF-T	YEL024W	RIP1	579	16	5527	38	543.765	5885.14	1265	0.704876	2.0236	2.25675	9.552	0.429853	4.65229	0.0923961	0.21185	0.212421	0.487049	0.436138
833	ST0833	chrV	+	101785	102393	ORF-T	YEL026W	SNU13	3752	81	386	178	3523.67	411.012	609	1.58186	4.864	0.682647	1.97911	5.78599	0.674897	8.57314	2.45767	1.18955	0.34101	3.48832
832	ST0832	chrV	+	100697	101513	ORF-T	YEL027W	CUP5	8334	170	5056	9	7826.83	5383.62	817	2.23971	9.39059	2.35949	10.5856	9.57996	6.5895	1.45382	0.88711	1.02017	0.622497	1.63883
831	ST0831	chrV	+	98073	99481	other	YEL028W	YEL028W	545	1802	433	1337	511.834	461.058	1409	-1.55075	0.212089	-0.395218	0.673533	0.36326	0.327224	1.11013	0.31489	1.71277	0.485832	3.52545
830	ST0830	chrV	+	94209	96577	ORF-T	YEL030W	ECM10	424	127	528	114	398.197	562.214	2369	-2.16264	0.115021	-0.823257	0.438999	0.168087	0.237321	0.708266	0.262006	1.46136	0.540596	2.70324
829	ST0829	chrV	+	90233	94017	ORF-T	YEL031W	SPF1	5934	9	2932	42	5572.88	3121.99	3785	1.17567	3.24031	0.0487731	1.04998	1.47236	0.824833	1.78504	3.08606	0.454388	0.785568	0.57842
828	ST0828	chrV	+	86897	90049	ORF-T	YEL032W	MCM3	2001	225	1395	220	1879.23	1485.39	3153	-0.410601	0.663252	-0.194112	0.823566	0.596013	0.471105	1.26514	0.805342	0.898622	0.572031	1.57093
827	ST0827	chrV	+	86441	86553	other	YEL033W	YEL033W	730	0	1068	3	685.575	1137.21	113	-2.87315	0.0565209	-3.17096	0.0419632	6.06704	10.0638	0.60286	1.34691	107.342	239.823	0.447586
826	ST0826	chrV	+	85593	86361	other	YEL034W, YEL033W	HYP2, YEL033W	6503	72	6677	908	6107.25	7109.66	769	2.53938	12.6719	2.38575	10.8672	7.94181	9.24534	0.859008	1.16607	0.626728	0.850756	0.736672
825	ST0825	chrV	+	80377	81185	ORF-T	YEL038W	UTR4	552	74	538	47	518.408	572.862	809	0.939114	2.55771	0.595451	1.81385	0.640801	0.708111	0.904943	1.4101	0.250537	0.390392	0.641757
824	ST0824	chrV	+	78033	79585	ORF-T	YEL040W	UTR2	7044	14	1372	238	6615.33	1460.9	1553	2.30176	9.99174	-1.03653	0.354685	4.25971	0.940698	4.52824	28.1708	0.426323	2.65221	0.160743
823	ST0823	chrV	+	75665	77585	ORF-T	YEL041W	YEF1	135	87	1368	59	126.784	1456.65	1921	-2.83721	0.0585892	0.916066	2.49944	0.0659992	0.758274	0.0870387	0.0234409	1.12647	0.303378	3.71311
822	ST0822	chrV	+	73585	75473	ORF-T	YEL042W	GDA1	2092	17	915	464	1964.69	974.291	1889	0.597151	1.81694	-0.00668807	0.993334	1.04007	0.515771	2.01653	1.82913	0.57243	0.519232	1.10246
821	ST0821	chrV	+	70433	73449	ORF-T	YEL043W	YEL043W	1364	30	1110	42	1280.99	1181.93	3017	-0.208531	0.811776	0.177672	1.19443	0.424592	0.391756	1.08382	0.679633	0.52304	0.327985	1.59471
820	ST0820	chrV	+	69049	70385	ORF-T	YEL044W	IES6	1844	280	712	95	1731.78	758.137	1337	0.766064	2.15128	0.621497	1.86171	1.29527	0.567043	2.28426	1.15554	0.602094	0.304582	1.97679
818	ST0818	chrV	+	58321	59297	ORF-T	YEL051W	VMA8	2451	945	1987	209	2301.84	2115.76	977	1.93728	6.93988	1.77359	5.89197	2.35603	2.16556	1.08795	1.17785	0.339492	0.367545	0.923674
817	ST0817	chrV	+	56537	58105	ORF-T	YEL052W	AFG1	1065	68	1531	15	1000.19	1630.21	1569	0.0869937	1.09089	0.501167	1.65065	0.637469	1.03901	0.613535	0.660886	0.584357	0.629456	0.928351
816	ST0816	chrV	+	47105	48457	ORF-T	YEL056W	HAT2	800	175	789	40	751.315	840.127	1353	0.0572716	1.05894	0.259421	1.29618	0.555296	0.620936	0.894288	0.816972	0.524387	0.479051	1.09464
814	ST0814	chrV	+	43217	44993	ORF-T	YEL058W	PCM1	2280	288	1224	235	2141.25	1303.31	1777	1.0649	2.90055	0.17555	1.1919	1.20498	0.733435	1.64293	2.43354	0.415432	0.615348	0.675117
813	ST0813	chrV	+	34321	36401	ORF-T	YEL062W	NPR2	489	104	583	132	459.242	620.778	2081	-1.01826	0.361223	-0.338533	0.712815	0.220683	0.298308	0.739784	0.506755	0.610933	0.418492	1.45984
811	ST0811	chrV	+	27625	29601	ORF-T	YEL065W	SIT1	715	31	2734	65	671.488	2911.16	1977	0.15363	1.16606	1.14017	3.12731	0.33965	1.47251	0.23066	0.372863	0.29128	0.470856	0.618619
810	ST0810	chrV	+	26137	27625	ORF-T	YEL066W	HPA3	374	97	842	326	351.24	896.561	1489	-2.37583	0.0929373	-1.82825	0.160695	0.23589	0.602123	0.391764	0.578347	2.53816	3.747	0.677385
809	ST0809	chrV	+	16177	17881	ORF-T	YEL071W	DLD3	2889	152	1921	235	2713.19	2045.48	1705	1.73417	5.66423	0.309132	1.36224	1.59131	1.19969	1.32643	4.15802	0.28094	0.880676	0.319005
808	ST0808	chrV	+	13569	14745	ORF-T	YEL072W	RMD6	462	4	570	103	433.885	606.936	1177	-0.869726	0.419066	-1.06302	0.345409	0.368636	0.515663	0.714878	1.21324	0.879661	1.4929	0.589228
845	ST0845	chrV	+	137129	138049	other	YELWdelta5	YELWdelta5	100	7	133	24	93.9144	141.618	921	-2.50198	0.0819229	-1.10352	0.331702	0.10197	0.153766	0.663152	0.246977	1.24471	0.463566	2.68507
851	ST0851	chrV	+	153473	156033	ORF-T	YER001W	MNN1	1945	78	726	56	1826.64	773.044	2561	0.965275	2.62551	-0.199418	0.819207	0.713251	0.301852	2.36291	3.20494	0.271662	0.368469	0.737272
852	ST0852	chrV	+	156769	157593	ORF-T	YER002W	NOP16	1184	40	307	40	1111.95	326.893	825	1.06106	2.88945	0.883265	2.41878	1.34781	0.396234	3.40156	1.19459	0.466461	0.163816	2.84748
853	ST0853	chrV	+	159337	160489	ORF-T	YER004W	FMP52	1509	248	1617	77	1417.17	1721.78	1153	0.937622	2.5539	1.69101	5.42493	1.22911	1.4933	0.823083	0.470771	0.481269	0.275267	1.74837
854	ST0854	chrV	+	160489	162505	ORF-T	YER005W	YND1	1473	200	903	88	1383.36	961.514	2017	-0.302617	0.738882	-0.529012	0.589187	0.68585	0.476705	1.43873	1.25407	0.928227	0.809089	1.14725
855	ST0855	chrV	+	162681	164385	ORF-T	YER006W	NUG1	2793	8	311	29	2623.03	331.153	1705	1.16825	3.21635	0.49716	1.64405	1.53843	0.194224	7.92091	1.95636	0.478316	0.118138	4.04879
856	ST0856	chrV	+	164449	166161	ORF-T	YER007W	PAC2	488	214	376	106	458.302	400.364	1713	-1.6059	0.200708	-0.739024	0.47758	0.267544	0.233721	1.14471	0.420261	1.333	0.489387	2.72382
857	ST0857	chrV	+	172065	172665	ORF-T	YER009W	NTF2	2060	68	914	117	1934.64	973.226	601	2.766	15.8949	2.30902	10.0646	3.21903	1.61935	1.98786	1.57929	0.20252	0.160895	1.25871
859	ST0859	chrV	+	175209	176113	ORF-T	YER011W	TIR1	179	29	17	41	168.107	18.1016	905	0.729178	2.07338	-3.31961	0.0361671	0.185753	0.0200018	9.28686	57.3277	0.0895898	0.553038	0.161996
860	ST0860	chrV	+	177761	178577	ORF-T	YER012W	PRE1	1346	945	1278	121	1264.09	1360.81	817	1.3732	3.94797	1.45006	4.26339	1.54723	1.66562	0.928921	0.926015	0.391906	0.39068	1.00314
861	ST0861	chrV	+	178817	182273	ORF-T	YER013W	PRP22	792	15	640	39	743.802	681.471	3457	-1.35189	0.258752	-0.816179	0.442118	0.215158	0.197128	1.09146	0.585255	0.831524	0.445872	1.86494
[truncated: 5,273 more rows]

## Sheet:  Key for Supplementary File 1A
Table S1: Genome-wide NET-seq (NET) and Poly A+ RNA hybridised to microarray (mi).
id	tx_ID	chr	strand	start	end	type	name	alias	glusco	gluasco	galsco	galasco	glunorm	galnorm	glength	502_glu1	antilog_glu	503_gal1	antilog_gal	glunocpb	galnocpb	netglu/netgal	miglu/migal	netglu/miglu	netgal/migal	net/micro
		chromosome		of gene	of gene				Unique processed (3'OH) reads for NET-seq in glucose on the sense or plus strand	Unique processed (3'OH) reads for NET-seq in glucose on the antisense or minus strand	Unique processed (3'OH) reads for NET-seq in galactose on the sense or plus strand	Unique processed (3'OH) reads for NET-seq in galacose on the antisense or minus strand	Normalised NET-seq reads for glucose sense strand	Normalised NET-seq reads for galactose sense strand	gene length	Microarray counts for polyA+ RNA in GLUCOSE		Microarray counts for polyA+ RNA in GALATOSE		Unique reads at 3'OH of nascent RNA in Glucose	Unique reads at 3'OH of nascent RNA in Galactose	Ratios	Ratios	Ratios	Ratios	Gives an indication of stability effects
			plus or minus

## Sheet:  Supplementary File 1B
Supplementary File 1B
DATA for Figure 1.
		All ORF-Ts UP NET seq/glu cf gal		Down
	OX	467	0.38595	18	0.014876	OX	1210
	RB	8	0.00825593	84	0.0866873	RB	969
	RC	14	0.00945307	392	0.264686	RC	1481
	Not YMC	38	0.0235878	57	0.0353818	NOT YMC	1611
	Total	527	0.099981	551	0.104534	Total	5271
Total in each class -Yeast mine
	OX	1210
	RB	969
	RC	1481
		3660
	Total	5271
	NOT YMC	1611

## Sheet: Supplementary File 1C
Supplementary File 1C: YMC genes (Coloured in columns A, C and E) that overlap with genes whose transcription changes >3-fold on the GLU to GAL shift (Column G - complete list colour coded)
OX genes		RB genes		RC genes		NET-seq genes both increased and decreased 3X GLU to GAL											Key						YMC genes that are not in original YMC lists annotated by hand				Sorted list from X				NET-seq genes both increased and decreased 3X GLU to GAL duplicates removed.
YAL012W		YAL060W		YAL008W		YAL012W												OX genes that also shift GLU/GAL 3X					YAL025C				YAL025C				YAL012W
YAL036C		YBL015W		YAL017W		YAL036C												RB genes that also shift GLU/GAL 3X					YAL059W				YAL059W				YAL036C
YAL038W		YBL043W		YAL028W		YAL038W												RC genes that also shift GLU/GAL 3X					YBL001C				YBL004W				YAL038W
YAR015W		YBL045C		YAL030W		YAR015W		How many YMC cycling genes are also regulated by >3-fold GLU/GAL shift?															YBL004W				YBL028C				YAR015W
YBL027W		YBL090W		YAL034C		YBL027W																	YBL018C				YBL039C, YBL039C-A				YBL027W
YBL029W		YBR039W		YAL054C		YBL029W			YMC genes (Colums A, C and E) that are also on >3-fold change in GLU to GAL list (column G)														YBL028C				YBL042C				YBL029W
YBL076C		YBR297W		YAL061W		YBL076C			All YMC classes			Just OX and RC											YBL030C				YBL055C				YBL076C
YBL087C		YDL004W		YAR035W		YBL087C			OX	483	0.392045	881											YBL039C, YBL039C-A				YBL081W				YBL087C
YBL092W		YDL069C		YBL064C		YBL092W			RB	78	0.0797546												YBL042C				YBR084W				YBL092W
YBR004C		YDL079C		YBL078C		YBR004C			RC	398	0.265688		0.322711										YBL055C				YBR142W				YBR004C
YBR031W		YDR031W		YBR001C		YBR031W			NC	93	0.088403												YBL081W				YBR238C				YBR031W
YBR048W		YDR148C		YBR005W		YBR048W			Total	1052	0.283711		32% of all OX and RC genes also show a >3-fold change on GLU-GAL										YBL091C-A				YBR247C				YBR048W
YBR085W		YDR178W		YBR018C		YBR085W							39% of all OX genes also shift in GLU to GAL										YBR020W				YBR267W				YBR085W
YBR092C		YDR201W		YBR046C		YBR092C			Total NET-seq in YMC	959	0.25863		26% of all RC genes also shift in GLU to GAL										YBR050C				YBR271W				YBR092C
YBR104W		YDR298C		YBR052C		YBR104W							8% of all RB genes also shift in GLU to GAL										YBR067C				YCL054W				YBR104W
YBR106W		YDR322C-A		YBR053C		YBR106W			YMC totals														YBR072W				YCL059C				YBR106W
YBR141C		YDR375C		YBR054W		YBR141C						OX plus RC total											YBR084W				YCR016W				YBR141C
YBR155W		YDR377W		YBR085c-a		YBR155W			OX	1232		2730											YBR142W				YCR047C				YBR155W
YBR189W		YDR516C		YBR116C		YBR189W			RB	978													YBR162W-A				YCR057C				YBR189W
YCL030C		YDR529C		YBR117C		YCL030C			RC	1498													YBR181C				YCR072C				YCL030C
YCL036W		YDR530C		YBR126C		YCL036W			Total	3708													YBR230W-A				YCR087C-A				YCL036W
YDL014W		YEL024W		YBR128C		YDL014W																	YBR238C				YDL031W				YDL014W
YDL048C		YEL065W		YBR132C		YDL048C																	YBR244W				YDL060W				YDL048C
YDL051W		YER026C		YBR137W		YDL051W																	YBR247C				YDL063C				YDL051W
YDL075W		YER058W		YBR139W		YDL075W																	YBR267W				YDL112W				YDL075W
YDL081C		YER060w-A		YBR149W		YDL081C																	YBR271W				YDL148C				YDL081C
YDL082W		YER098W		YBR169C		YDL082W																	YCL033C				YDL150W				YDL082W
YDL083C		YFL030W		YBR183W		YDL083C																	YCL035C				YDL153C				YDL083C
YDL130W		YFL052W		YBR203W		YDL130W																	YCL048W-A				YDL167C				YDL130W
YDL191W		YFR033C		YBR212W		YDL191W																	YCL054W				YDL201W				YDL191W
YDL208W		YFR049W		YBR214W		YDL208W																	YCL058W-A				YDR021W				YDL208W
YDR014W		YGL062W		YBR230C		YDR014W-A																	YCL059C				YDR037W				YDR014W-A
YDR064W		YGL191W		YBR241C		YDR064W																	YCL064C				YDR060W				YDR064W
YDR091C		YGR174C		YBR269C		YDR091C																	YCR016W				YDR083W				YDR091C
YDR156W		YHL021C		YBR280C		YDR156W, YDR157W																	YCR031C				YDR087C				YDR156W, YDR157W
YDR184C		YHR033W		YBR285W		YDR183C-A, YDR184C																	YCR047C				YDR101C				YDR183C-A, YDR184C
YDR222W		YHR043C		YBR298C		YDR222W																	YCR057C				YDR120C				YDR222W
YDR232W		YHR198C		YCL035C		YDR223W																	YCR072C				YDR161W				YDR223W
YDR300C		YIL015W		YCL040W		YDR300C																	YCR073W-A				YDR165W				YDR300C
YDR321W		YIL125W		YCL042W		YDR321W																	YCR087C-A				YDR281C				YDR321W
YDR341C		YJL102W		YCR004C		YDR341C																	YDL021W				YDR299W				YDR341C
YDR345C		YJR077C		YCR010C		YDR345C																	YDL024C, YDL022C-A				YDR324C				YDR345C
YDR399W		YKL085W		YCR061W		YDR399W																	YDL031W				YDR361C				YDR399W
YDR418W		YKL109W		YCR083W		YDR418W																	YDL060W				YDR398W				YDR418W
YDR465C		YKL148C		YDL022W		YDR465C																	YDL063C				YDR449C				YDR465C
YEL026W		YKR097W		YDL046W		YEL026W																	YDL067C				YDR471W				YEL026W
YEL040W		YLR023C		YDL049C		YEL040W																	YDL112W				YDR496C				YEL040W
YEL054C		YLR053C		YDL078C		YEL054C																	YDL121C				YEL048C				YEL054C
YEL055C		YLR089C		YDL085W		YEL055C																	YDL136W				YER006W				YEL055C
YER002W		YLR168C		YDL110C		YER002W																	YDL148C				YER049W				YER002W
YER052C		YLR177W		YDL124W		YER052C																	YDL150W				YER126C				YER052C
YER056C		YLR218C		YDL129W		YER056C																	YDL153C				YER127W				YER056C
YER056C-A		YLR294C		YDL130W-A		YER056C-A																	YDL167C				YER137C				YER056C-A
YER064C		YLR295C		YDL149W		YER062C																	YDL169C				YFR055W				YER062C
YER066W		YLR304C		YDL174C		YER066W																	YDL200C				YGL029W				YER066W
YER074W		YML081C-A		YDL181W		YER074W																	YDL201W				YGL078C				YER074W
YER082C		YML091C		YDL183C		YER082C																	YDL229W				YGL099W				YER082C
YER110C		YML120C		YDL194W		YER110C																	YDL241W				YGL111W				YER110C
YER131W		YMR056C		YDL199C		YER131W																	YDR009W				YGL120C				YER131W
YER156C		YMR145C		YDL204W		YER156C																	YDR021W				YGL147C				YER156C
YFL034C-A		YMR304C-A		YDL214C		YFL034C-A																	YDR037W				YGL171W				YFL034C-A
YFR023W		YMR305C		YDL215C		YFR023W																	YDR058C				YGR081C				YFR023W
YFR031C-A		YNL052W		YDL222C		YFR031C-A																	YDR060W				YGR103W				YFR031C-A
YFR032C-A		YNL100W		YDL223C		YFR032C-A, YFR032C-B																	YDR083W				YGR128C				YFR032C-A, YFR032C-B
YGL031C		YNL117W		YDR001C		YGL031C																	YDR087C				YGR138C				YGL031C
YGL076C		YNR001C		YDR018C		YGL076C																	YDR101C				YGR162W				YGL076C
YGL123W		YOL053W		YDR032C		YGL123W																	YDR119W-A				YGR187C				YGL123W
YGL148W		YOL152W		YDR034W-B		YGL148W																	YDR120C				YGR200C				YGL148W
YGL234W		YOR065W		YDR059C		YGL234W																	YDR161W				YGR245C				YGL234W
YGR061C		YOR382W		YDR070C		YGR061C																	YDR165W				YGR264C				YGR061C
YGR079W		YPL134C		YDR074W		YGR079W																	YDR259C				YGR271C-A, YGR272C				YGR079W
YGR085C		YPL262W		YDR077W		YGR085C																	YDR277C				YGR283C				YGR085C
YGR087C		YPR191W		YDR085C		YGR087C																	YDR281C				YHL011C				YGR087C
YGR090W		YDR309C		YDR096W		YGR090W																	YDR287W				YHR010W				YGR090W
YGR123C		YKL146W		YDR100W		YGR123C																	YDR299W				YHR021C				YGR123C
YGR124W		YLL041C		YDR111C		YGR124W																	YDR309C				YHR048W				YGR124W
YGR145W		YLR299W		YDR171W		YGR145W																	YDR324C				YHR052W				YGR145W
YGR159C		YMR280C		YDR204W		YGR159C																	YDR361C				YHR062C				YGR159C
YGR214W		YOR114W		YDR216W		YGR214W																	YDR379C-A				YHR064C				YGR214W
YGR251W		YPR020W		YDR231C		YGR251W																	YDR382W				YHR081W				YGR251W
YGR280C		YAL007C		YDR247W		YGR280C																	YDR398W				YHR085W				YGR280C
YGR285C		YAL023C		YDR255C		YGR285C																	YDR447C				YHR148W				YGR285C
YHL033C		YAL024C		YDR256C		YHL033C																	YDR449C				YHR169W				YHL033C
YHR019C		YAL034W-A		YDR258C		YHR019C																	YDR450W				YHR170W				YHR019C
YHR020W		YAL046C		YDR357C		YHR020W																	YDR461C-A				YHR197W				YHR020W
YHR046C		YAR002C-A		YDR358W		YHR046C																	YDR471W				YIL019W				YHR046C
YHR049W		YAR003W		YDR380W		YHR049W																	YDR496C				YIL020C-A, YIL020C				YHR049W
YHR066W		YAR008W		YDR406W		YHR066W																	YDR497C				YIL064W				YHR066W
YHR069C				YDR435C		YHR069C																	YDR504C, YDR505C				YIL091C				YHR069C
YHR070W		YBL002W		YDR492W		YHR070W																	YDR512C				YIL096C				YHR070W
YHR088W		YBL003C		YEL011W		YHR088W																	YDR513W				YIL103W				YHR088W
YHR089C		YBL009W		YEL012W		YHR089C																	YDR536W				YIL104C				YHR089C
YHR144C		YBL010C		YEL039C		YHR144C																	YEL048C				YIL127C				YHR144C
YHR179W		YBL011W		YEL041W		YHR179W																	YER006W				YIL133C				YHR179W
YIL053W		YBL021C		YEL057C		YIL053W																	YER049W				YIL145C				YIL053W
YIL064W		YBL022C		YEL059C-A		YIL079C																	YER102W				YIR012W				YIL079C
YIL079C		YBL030C		YER011W		YIR017C																	YER117W				YIR026C				YIR017C
YIR017C		YBL031W		YER015W		YIR032C																	YER126C				YJL010C				YIR032C
YIR032C		YBL032W		YER028C		YJL038C																	YER127W				YJL033W				YJL038C
YJL038C		YBL034C		YER037W		YJL069C																	YER137C				YJL050W				YJL069C
YJL069C		YBL035C		YER053C		YJL080C																	YFL018C				YJL109C				YJL080C
YJL080C		YBL037W		YER054C		YJL098W																	YFR014C				YJR041C				YJL098W
YJL098W		YBL038W		YER067W		YJL116C																	YFR052C-A, YFR053C				YJR063W				YJL116C
YJL116C		YBL052C		YER079W		YJL122W																	YFR055W				YJR097W				YJL122W
YJL122W		YBL059W		YER121W		YJL125C																	YGL029W				YKL009W				YJL125C
YJL125C		YBL063W		YER142C		YJL136C																	YGL030W				YKL014C				YJL136C
YJL136C		YBL066C		YER150W		YJL148W																	YGL078C				YKL078W				YJL148W
YJL148W		YBL080C		YER175C		YJL177W																	YGL099W				YKL143W				YJL177W
YJL177W		YBL100C		YER179W		YJL189W																	YGL103W				YKL172W				YJL189W
YJL189W		YBL107C		YFL014W		YJL190C																	YGL111W				YKL205W				YJL190C
YJL190C		YBL112C		YFL026W		YJL191W																	YGL120C				YKL216W				YJL191W
YJL191W		YBR003W		YFL054C		YJL200C																	YGL135W				YKR024C				YJL200C
YJL200C		YBR010W		YFR015C		YJL212C																	YGL146C				YKR060W				YJL212C
YJL212C		YBR013C		YFR017C		YJR002W																	YGL147C				YKR081C				YJR002W
YJR002W		YBR028C		YGL010W		YJR016C																	YGL157W				YKR092C				YJR016C
YJR016C		YBR029C		YGL035C		YJR047C																	YGL169W, YGL168W				YLL008W				YJR047C
YJR047C		YBR033W		YGL037C		YJR055W																	YGL171W				YLL011W				YJR055W
YJR055W		YBR036C		YGL081W		YJR070C																	YGL189C, YGL188C-A				YLL034C				YJR070C
YJR070C		YBR037C		YGL104C		YJR123W																	YGL249W				YLR002C				YJR123W
YJR123W		YBR041W		YGL121C		YJR124C																	YGR023W				YLR003C				YJR124C
YJR124C		YBR044C		YGL156W		YJR145C																	YGR027C				YLR009W				YJR145C
YJR145C		YBR070C		YGL205W		YKL006W																	YGR034W				YLR058C				YKL006W
YKL006W		YBR073W		YGL209W		YKL029C																	YGR081C				YLR068W				YKL029C
YKL029C		YBR078W		YGL227W		YKL056C																	YGR103W				YLR129W				YKL056C
YKL056C		YBR088C		YGL250W		YKL180W																	YGR111W				YLR180W				YKL180W
YKL180W		YBR089W		YGR008C		YKL191W																	YGR128C				YLR186W				YKL191W
YKL191W		YBR091C		YGR019W		YKR025W																	YGR138C				YLR196W				YKR025W
YKL205W		YBR096W		YGR043C		YKR034W																	YGR148C				YLR221C				YKR034W
YKR025W		YBR100W		YGR052W		YKR039W																	YGR162W				YLR222C				YKR039W
YKR034W		YBR120C		YGR053C		YKR056W																	YGR174W-A				YLR276C				YKR056W
YKR039W		YBR122C		YGR060W		YKR057W																	YGR183C				YLR384C				YKR057W
YKR056W		YBR123C		YGR067C		YKR094C																	YGR187C				YLR397C				YKR094C
YKR057W		YBR125C		YGR070W		YKR099W																	YGR200C				YLR409C				YKR099W
YKR094C		YBR130C		YGR086C		YLL035W																	YGR211W				YLR413W				YLL035W
YKR099W		YBR133C		YGR088W		YLL045C																	YGR234W				YLR435W				YLL045C
YLL035W		YBR146W		YGR110W		YLR017W																	YGR245C				YML080W				YLR017W
YLL045C		YBR156C		YGR127W		YLR029C																	YGR264C				YML093W				YLR029C
YLR017W		YBR159W		YGR130C		YLR044C																	YGR271C-A, YGR272C				YML108W				YLR044C
YLR029C		YBR162C		YGR161C		YLR048W																	YGR283C				YMR014W				YLR048W
YLR044C		YBR162W-A		YGR194C		YLR051C																	YHL011C				YMR128W				YLR051C
YLR048W		YBR185C		YGR201C		YLR061W																	YHL012W				YMR217W				YLR061W
YLR051C		YBR192W		YGR205W		YLR063W																	YHL015W				YMR229C				YLR063W
YLR061W		YBR205W		YGR225W		YLR073C																	YHL044W				YMR239C				YLR073C
YLR063W		YBR206W		YGR230W		YLR074C																	YHR010W				YMR259C				YLR074C
YLR073C		YBR243C		YGR236C		YLR106C																	YHR021C				YMR290C				YLR106C
YLR074C		YBR251W		YGR243W		YLR142W																	YHR048W				YMR319C				YLR142W
YLR106C		YBR262C		YGR244C		YLR150W																	YHR052W				YNL002C				YLR150W
YLR142W		YBR268W		YGR248W		YLR175W																	YHR062C				YNL022C				YLR175W
YLR150W		YBR275C		YGR289C		YLR185W																	YHR064C				YNL061W				YLR185W
YLR175W		YBR282W		YHL024W		YLR197W																	YHR072W-A	First batch			YNL113W				YLR197W
YLR185W		YBR294W		YHL032C		YLR243W																	YHR081W				YNL119W				YLR243W
YLR197W		YCL005W		YHR001W		YLR249W																	YHR085W				YNL132W				YLR249W
YLR243W		YCL012W		YHR002W		YLR264W																	YHR087W				YNL151C				YLR264W
YLR249W		YCL014W		YHR016C		YLR287C																	YHR136C				YNL182C				YLR287C
YLR264W		YCL017C		YHR075C		YLR293C																	YHR141C				YNL248C				YLR293C
YLR287C		YCL024W		YHR080C		YLR325C																	YHR148W				YNL302C				YLR325C
YLR293C		YCL049C		YHR094C		YLR333C																	YHR169W				YNL308C				YLR333C
YLR325C		YCL057c-a		YHR096C		YLR336C																	YHR170W				YNL313C				YLR336C
YLR333C		YCL061C		YHR097C		YLR344W																	YHR174W				YNR024W				YLR344W
YLR336C		YCL063W		YHR137W		YLR359W																	YHR197W				YNR054C				YLR359W
YLR344W		YCL064C		YHR138C		YLR372W																	YHR203C				YOL014W				YLR372W
YLR359W		YCR002C		YHR140W		YLR388W																	YIL018W				YOL022C				YLR388W
YLR372W		YCR003W		YHR143W		YLR401C																	YIL019W				YOL039W				YLR401C
YLR388W		YCR005C		YHR160C		YLR406C																	YIL020C-A, YIL020C				YOL041C				YLR406C
YLR401C		YCR020C		YHR202W		YLR420W																	YIL037C				YOL080C				YLR420W
YLR406C		YCR024C		YIL045W		YLR432W																	YIL052C				YOL092W				YLR432W
YLR420W		YCR028C-A		YIL055C		YLR441C																	YIL064W				YOR047C				YLR441C
YLR432W		YCR044C		YIL057C		YLR448W																	YIL065C				YOR056C				YLR448W
YLR441C		YCR046C		YIL097W		YLR449W																	YIL069C				YOR095C				YLR449W
YLR448W		YCR065W		YIL107C		YML014W																	YIL078W				YOR108W				YML014W
YLR449W		YCR067C		YIL113W		YML018C																	YIL091C				YOR206W				YML018C
YML014W		YCR071C		YIL136W		YML022W																	YIL096C				YOR207C				YML022W
YML018C		YCR086W		YIL155C		YML026C																	YIL103W				YOR243C				YML026C
YML022W		YCR089W		YIL160C		YML043C																	YIL104C				YOR252W				YML043C
YML026C		YCR090C		YIR038C		YML060W																	YIL111W				YOR272W				YML060W
YML043C		YCR092C		YIR039C		YML063W																	YIL124W				YOR287C				YML063W
YML060W		YCR098C		YJL037W		YML073C																	YIL127C				YOR294W				YML073C
YML063W		YCR102C		YJL045W		YML096W																	YIL133C				YOR309C, YOR310C				YML096W
YML073C		YDL003W		YJL048C		YML113W																	YIL145C				YOR359W				YML113W
YML096W		YDL009C		YJL052W		YML125C																	YIL148W				YOR361C				YML125C
YML100W-A		YDL010W		YJL066C		YMR049C																	YIL162W				YPL012W				YMR049C
YML113W		YDL012C		YJL068C		YMR069W																	YIR012W				YPL043W				YMR069W
YML125C		YDL017W		YJL137C		YMR093W																	YIR026C				YPL086C				YMR093W
YMR049C		YDL018C		YJL141C		YMR095C																	YJL010C				YPL093W				YMR095C
YMR069W		YDL033C		YJL142C		YMR120C																	YJL033W				YPL126W				YMR120C
YMR093W		YDL040C		YJL144W		YMR131C																	YJL050W				YPL160W				YMR131C
YMR095C		YDL044C		YJL155C		YMR142C																	YJL103C				YPL183C				YMR142C
YMR120C		YDL045W-A		YJL163C		YMR194W																	YJL105W				YPL217C				YMR194W
YMR131C		YDL052C		YJL164C		YMR266W																	YJL109C				YPL226W				YMR266W
YMR142C		YDL066W		YJL185C		YMR269W																	YJL130C				YPL266W				YMR269W
YMR194W		YDL077C		YJL217W		YMR300C																	YJL133C-A				YPL273W				YMR300C
YMR266W		YDL085c-a		YJR008W		YMR309C																	YJL161W				YPR010C				YMR309C
YMR269W		YDL089W		YJR009C		YNL023C																	YJL166W				YPR110C				YNL023C
YMR309C		YDL093W		YJR036C		YNL065W																	YJR005C-A				YPR112C				YNL065W
YNL023C		YDL095W		YJR073C		YNL069C																	YJR041C				YPR143W				YNL069C
YNL065W		YDL101C		YJR095W		YNL075W																	YJR048W				YPR163C				YNL075W
YNL069C		YDL102W		YJR096W		YNL095C																	YJR063W				YCR031C				YNL095C
YNL075W		YDL103C		YJR148W		YNL110C																	YJR074W				YDR382W				YNL110C
YNL095C		YDL107W		YJR149W		YNL112W																	YJR085C				YGL030W				YNL112W
YNL110C		YDL119C		YKL026C		YNL141W																	YJR097W				YGL103W				YNL141W
YNL112W		YDL120W		YKL055C		YNL162W																	YJR120W, YJR121W				YGL189C, YGL188C-A				YNL162W
YNL141W		YDL127W		YKL091C		YNL162W-A																	YJR151C				YGR027C				YNL162W-A
YNL162W		YDL135C		YKL093W		YNL175C																	YKL009W				YGR148C				YNL175C
YNL175C		YDL145C		YKL100C		YNL209W																	YKL014C				YHL015W				YNL209W
YNL209W		YDL146W		YKL103C		YNL220W																	YKL016C	3rd batch			YIL052C				YNL220W
YNL220W		YDL157C		YKL107W		YNL234W																	YKL025C				YIL148W				YNL234W
YNL234W		YDL158C		YKL133C		YNL255C																	YKL062W				YLR167W				YNL255C
YNL255C		YDL164C		YKL142W		YNL277W-A																	YKL078W				YLR340W				YNL277W-A
YNL277W		YDL178W		YKL151C		YNL282W																	YKL141W				YML024W				YNL282W
YNL282W		YDL192W		YKL162C		YNL292W																	YKL143W				YMR242C				YNL292W
YNL292W		YDL198C		YKL162C-A		YNR012W																	YKL146W				YNL178W				YNR012W
YNR012W		YDL202W		YKL163W		YNR014W																	YKL172W				YOR369C				YNR014W
YNR014W		YDL205C		YKL171W		YNR015W																	YKL205W				YPL220W				YNR015W
YNR015W		YDL211C		YKL187C		YNR038W																	YKL216W				YPR102C				YNR038W
YNR038W		YDL219W		YKL188C		YNR046W																	YKR015C				YPR132W				YNR046W
YNR046W		YDL225W		YKL193C		YOL010W																	YKR024C				YDR309C				YOL010W
YOL010W		YDL232W		YKL217W		YOL040C																	YKR060W				YKL146W				YOL040C
YOL040C		YDL240W		YKR009C		YOL052C-A																	YKR081C				YLL041C				YOL052C-A
YOL052C		YDL243C		YKR067W		YOL077C																	YKR092C				YLR299W				YOL077C
YOL077C		YDL247W		YKR075C		YOL093W																	YKR098C				YMR280C				YOL093W
YOL093W		YDR009W		YKR076W		YOL097C																	YLL008W				YOR114W				YOL097C
YOL097C		YDR028C		YLL026W		YOL120C																	YLL011W				YPR020W				YOL120C
YOL120C		YDR036C		YLL039C		YOL124C																	YLL024C				YBL091C-A				YOL124C
YOL124C		YDR041W		YLR038C		YOL125W																	YLL034C				YBR067C				YOL125W
YOL125W		YDR044W		YLR070C		YOL127W																	YLL041C				YBR072W				YOL127W
YOL127W		YDR052C		YLR080W		YOL128C																	YLR002C				YDL021W				YOL128C
YOL128C		YDR061W		YLR081W		YOL136C																	YLR003C				YDL169C				YOL136C
YOL136C		YDR068W		YLR149C		YOL144W																	YLR009W				YDR504C, YDR505C				YOL144W
YOL144W		YDR079W		YLR151C		YOR004W																	YLR058C				YDR513W				YOR004W
YOR004W		YDR084C		YLR152C		YOR032C																	YLR068W				YDR536W				YOR032C
YOR032C		YDR093W		YLR164W		YOR051C																	YLR129W				YFR052C-A, YFR053C				YOR051C
YOR051C		YDR094W		YLR174W		YOR063W																	YLR167W				YGR023W				YOR063W
YOR063W		YDR097C		YLR178C		YOR078W																	YLR180W				YGR211W				YOR078W
YOR078W		YDR113C		YLR251W		YOR096W																	YLR186W				YHR087W				YOR096W
YOR096W		YDR115W		YLR252W		YOR133W																	YLR196W				YIL065C				YOR133W
YOR133W		YDR116C		YLR258W		YOR145C																	YLR221C				YIL124W				YOR145C
YOR145C		YDR130C		YLR267W		YOR153W																	YLR222C				YIL162W				YOR153W
YOR153W		YDR144C		YLR270W		YOR167C																	YLR276C				YJL161W				YOR167C
YOR167C		YDR147W		YLR271W		YOR168W																	YLR299W				YJR048W				YOR168W
YOR168W		YDR170C		YLR273C		YOR202W, YOR203W																	YLR340W				YJR120W, YJR121W				YOR202W, YOR203W
YOR202W		YDR175C		YLR281C		YOR209C																	YLR363W-A				YJR151C				YOR209C
YOR203W		YDR183W		YLR284C		YOR234C																	YLR384C				YKL016C				YOR234C
YOR209C		YDR194C		YLR312C		YOR293W																	YLR397C				YKL062W				YOR293W
YOR234C		YDR210W		YLR327C		YOR306C																	YLR409C				YKL141W				YOR306C
YOR293W		YDR224C		YLR345W		YOR335C																	YLR413W				YKR098C				YOR335C
YOR306C		YDR226W		YLR346C		YOR337W																	YLR435W				YMR250W				YOR337W
YOR335C		YDR237W		YLR356W		YOR340C																	YML024W				YOL117W				YOR340C
YOR337W		YDR251W		YLR377C		YOR341W																	YML080W				YOR328W				YOR341W
YOR340C		YDR254W		YLR395C		YPL026C																	YML093W				YOR384W				YPL026C
YOR341W		YDR261C		YLR437C		YPL079W																	YML108W				YOR386W				YPL079W
YPL026C		YDR263C		YLR438W		YPL081W																	YML118W				YPL087W				YPL081W
YPL079W		YDR268W		YLR452C		YPL090C																	YMR014W				YPL248C				YPL090C
YPL081W		YDR279W		YML042W		YPL106C																	YMR128W				YBL001C				YPL106C
YPL090C		YDR282C		YML054C		YPL131W																	YMR217W				YBL018C				YPL131W
YPL106C		YDR286C		YML100W		YPL143W																	YMR229C				YBL030C				YPL143W
YPL131W		YDR292C		YML128C		YPL146C																	YMR239C				YBR020W				YPL146C
YPL143W		YDR296W		YML131W		YPL211W																	YMR242C				YBR050C				YPL211W
YPL146C		YDR316W		YMR031C		YPL212C																	YMR250W				YBR162W-A				YPL212C
YPL211W		YDR322W		YMR041C		YPL239W																	YMR259C				YBR181C				YPL239W
YPL212C		YDR337W		YMR052C-A		YPL245W																	YMR280C				YBR230W-A				YPL245W
YPL239W		YDR347W		YMR053C		YPL249C-A																	YMR290C				YBR244W				YPL249C-A
YPL245W		YDR348C		YMR081C		YPL265W																	YMR316W				YCL033C				YPL265W
YPL249C-A		YDR353W		YMR084W		YPR036W-A																	YMR319C				YCL035C				YPR036W-A
YPL265W		YDR356W		YMR085W		YPR041W																	YNL002C				YCL048W-A				YPR041W
YPR036W		YDR362C		YMR105C		YPR043W																	YNL022C				YCL058W-A				YPR043W
YPR041W		YDR376W		YMR107W		YPR074C																	YNL061W				YCL064C				YPR074C
YPR043W		YDR381W		YMR110C		YPR137W																	YNL113W				YCR073W-A				YPR137W
YPR074C		YDR389W		YMR114C		YPR144C																	YNL119W				YDL024C, YDL022C-A				YPR144C
YPR137W		YDR393W		YMR118C		YAL025C																	YNL132W				YDL067C				YAL025C
YPR144C		YDR400W		YMR135C		YAL059W																	YNL144C				YDL121C				YAL059W
YAL025C		YDR405W		YMR136W		YBL004W																	YNL151C				YDL136W				YBL004W
YAL059W		YDR414C		YMR148W		YBL028C																	YNL178W				YDL200C				YBL028C
YBL004W		YDR430C		YMR169C		YBL039C, YBL039C-A																	YNL182C				YDL229W				YBL039C, YBL039C-A
YBL028C		YDR438W		YMR170C		YBL042C																	YNL241C				YDL241W				YBL042C
YBL039C, YBL039C-A		YDR440W		YMR174C		YBL055C																	YNL248C				YDR009W				YBL055C
YBL042C		YDR444W		YMR175W		YBL081W																	YNL302C				YDR058C				YBL081W
YBL055C		YDR451C		YMR181C		YBR084W																	YNL308C				YDR119W-A				YBR084W
YBL081W		YDR462W		YMR191W		YBR142W																	YNL313C				YDR259C				YBR142W
YBR084W		YDR480W		YMR196W		YBR238C																	YNR024W				YDR277C				YBR238C
YBR142W		YDR484W		YMR206W		YBR247C																	YNR054C				YDR287W				YBR247C
[truncated: 1,218 more rows]

## Sheet:  Supplementary File 1D
Supplementary File 1D: Gene Ontology (GO) associated with genes that change >3-fold on the GLU to GAL shift
[truncated: 60 more rows]

[truncated: 13 more sheets:  Supplementary File 1E,  Supplementary File 1F,  Supplementary File 1G,  Supplementary File 1H, Key to  Supplementary File 1H ,  Supplementary File 1I,  Supplementary File 1J,  Supplementary File 1K,  Supplementary File 1L,  Supplementary File 1M,  Supplementary File 1N,  Supplementary File 1O,  Supplementary File 1P]
