# Supplementary material for: Transcription mediated insulation and interference direct gene cluster expression switches
Source: eLife journal article supplement (doi:10.7554/elife.03635), 2014-11-19
Supplement: supp [file elife_poa_e03635_Supplementary_File_3.xlsx]

## Sheet: Supplementary File 3A
Supplementary File 3A for Figure 2B
			Only S	Only AS
FSH 1	140814	D	1	0.473118
		1hG	0.483235	0.700197
Tania 2	91112	D	1	0.4375
		1hG	0.48694	0.649254
n=2
average of highlighted expts			Only S	Only AS	error
			HMS2 S (A)	HMS2 AS (B)	Only S	Only AS
		GLU	1	0.455309	0	0.0178091
		GAL	0.485088	0.674725	0.00185279	0.0254718					n=2
									used hms2 mean (MAX) as threshold

## Sheet: Supplementary File 3C
Supplementary File 3C. For figure 3C - source file 1 HMS2:ADH1t
HMS2:ADH1
Glu/gal
											Fold increase in BAT2 sense with ADHt
#1	BAT2 S	1	11328.3		rRNA	1	33381.8	HMS2 Glu	0.339355		2.01455	Glu
		2	34800.3			2	33268.6	HMS2 Gal	1.04604		1.83011	Gal		3.08243	fold increase in wt glu to gal
		3	21746.6			3	31809.6	HMS2:ADH Glu	0.683648					2.80022	fold increase in adh glu to gal
		4	38834.3			4	20285.8	HMS2:ADH Gal	1.91437
									bat2							sense
			as
#2	HMS2 S	rRNA			HMS2 AS	rRNA				rRNA			HMS2 sense		HMS2 antisense		BAT2 sense				HMS2 sense		HMS2 antisense		BAT2 sense
HMS2 Glu	7903.42	27719.1	0.285126	HMS2 Glu	13698.8	29684.1	0.461486	HMS2 Glu	11729.8	34605.1	0.338963	HMS2 Glu	0.271115	0.0140109	0.445603	0.0158827	0.339159	0.000196326		HMS2 Glu	0.271115	0.0140109	0.445603	0.0158827	0.339159	0.000196326
HMS2 Gal	3126.28	28185.4	0.110918	HMS2 Gal	34390.3	27496.9	1.2507	HMS2 Gal	36994.9	29414.1	1.25773	HMS2 Gal	0.107229	0.00368924	1.16729	0.0834129	1.15188	0.105844		HMS2:ADH Glu	1.32063	0.154899	0.16434	0.00263442	0.800354	0.116706
HMS2:ADH Glu	32962.3	22339.3	1.47553	HMS2:ADH Glu	4210.7	25217.7	0.166974	HMS2:ADH Glu	22303.7	24320.9	0.917059	HMS2:ADH Glu	1.32063	0.154899	0.16434	0.00263442	0.800354	0.116706		HMS2 Gal	0.107229	0.00368924	1.16729	0.0834129	1.15188	0.105844
HMS2:ADH Gal	9414.64	14344	0.656347	HMS2:ADH Gal	3203.18	16018.2	0.199971	HMS2:ADH Gal	41151.3	18729.7	2.19711	HMS2:ADH Gal	0.575875	0.0804718	0.195719	0.00425236	2.05574	0.141373		HMS2:ADH Gal	0.575875	0.0804718	0.195719	0.00425236	2.05574	0.141373
																				HMS2 Glu	0.271115	0.0140109	0.445603	0.0158827	0.339159	0.000196326
																				HMS2 Gal	0.107229	0.00368924	1.16729	0.0834129	1.15188	0.105844
																				HMS2:ADH Glu	1.32063	0.154899	0.16434	0.00263442	0.800354	0.116706
																				HMS2:ADH Gal	0.575875	0.0804718	0.195719	0.00425236	2.05574	0.141373
#1
HMS2AS									#1	HMS2 S
		as			rRNA 18S	as/rrna					s		rRNA	s/rrna
HMS2 Glu	1	15615.5		1	36338.8	0.429721	HMS2 Glu	2.52227		1	8789.32	1	34185.9	0.257104	HMS2 Glu		2.48314
HMS2 Gal	2	39419.9		2	36369.5	1.08387	HMS2 Gal			2	3484.48	2	33653.5	0.10354	HMS2 Gal				4.53409	Glucose adh/wt
HMS2:ADH Glu	3	5478.43		3	33879.1	0.161705	HMS2:ADH Glu	1.18404		3	34543.4	3	29632.4	1.16573	HMS2:ADH Glu		2.3531		4.78466	Galactose adh/wt
HMS2:ADH Gal	4	3946.62		4	20612.6	0.191466	HMS2:ADH Gal			4	9931.42	4	20047.1	0.495403	HMS2:ADH Gal

## Sheet: Supplementary File 3D
Supplementary File 3D. Source data for Fig. 3F - number of cells with sense transcript.
relative to WT
		BY4741	HMS2.ADH
FSH	300513	1	2.03651			N.B. original data for these expts found in their own subfolders in FISH analysis folder
	130613	1	1.68456			N.B. original data for these expts found in their own subfolders in FISH analysis folder
Tania	50213	1	0.892222
	111012	1	1.04079
	201112	1	1.50257
				error								error
average		WT	HMS2.ADH1t	BY4741	HMS2.ADH					WT	HMS2.ADH1t	BY4741	HMS2.ADH
	Induction	1	1.43133	0	0.209596				Induction	1	1.56611	0	0.207226
									with Tania's expt 050213 removed
		used threshold of hms2 mean (MAX)

## Sheet: Supplementary File 3E
Supplementary File 3E. Source data for Fig. 3F mean signal per cell
relative to WT
		BY4741	HMS2.ADH
FSH	300513	1	1.13616		N.B. original data for these expts found in their own subfolders in FISH analysis folder
	130613	1	1.04737
Tania	50213	1	1.00055
	111012	1	1.01491
	201112	1	1.04626
				error
average		WT	HMS2.ADH1t	BY4741	HMS2.ADH
	Mean signal	1	1.04905	0	0.0235756
	I've set these scales the same as the induction graph in case you're putting them side by side

## Sheet: Supplementary File 3H
Supplementary File 3H. Figure 5D
GAL:HMS2																GAL:HMS2											3000	rRNA		s/rRNA
HMS2 sense				rRNA	s/rRNA						3000	rRNA		s/rRNA		HMS2 sense				rRNA	s/rRNA		Glu	6335.66	6335.66	0	0	34751.3	34751.3	0.182315
Glucose	9702.37	9702.37	0	32160.1	0.30169		Glu	6335.66	6335.66	0	0	34751.3	34751.3	0.182315		Glucose	9702.37	9702.37	0	32160.1	0.30169		60	7720.97	7720.97	0	0	41663.4	41663.4	0.185318
5	9451.97	9451.97	0	32343.7	0.292236		60	7720.97	7720.97	0	0	41663.4	41663.4	0.185318		60	8330.37	8330.37	0	28585.4	0.29142		180	37662.1	37662.1	0	0	44738.5	44738.5	0.841827
30	7815.78	7815.78	0	32326.4	0.241777		120	14225.9	14225.9	0	0	47384.7	47384.7	0.300222		180	31993	31993	0	23184.4	1.37993
60	8330.37	8330.37	0	28585.4	0.29142		180	37662.1	37662.1	0	0	44738.5	44738.5	0.841827
180	31993	31993	0	23184.4	1.37993
									av	error	av	error	av	error
									GAL:HMS2 sense		GAL:HMS2 as		BAT2 sense			Glucose
								Glucose	0.242002	0.0596876	0.438849	0.036573	0.438716	0.0856469		60
								60	0.238369	0.0530512	0.819424	0.0498138	1.05725	0.121711		180
								180	1.11088	0.269053	0.346281	0.141275	0.502473	0.081926
as #1	as	rRNA	as/rRNA										as #1	as	rRNA	as/rRNA
Glucose	15523	32651	0.475421		#2		as	rrna			as/rRNA		Glucose	15523	32651	0.475421		#2		as	rrna			as/rRNA
5	15503.4	33484.3	0.463004		as 2	Glu	17980.6	44697.2	0	44697.2	0.402276		60	23763.3	30877.1	0.769611		as 2	Glu	17980.6	44697.2	0	44697.2	0.402276
30	23575.8	30362.3	0.776481			60	37574.4	43226.9	0	43226.9	0.869238		180	9171.85	44739.4	0.205006			60	37574.4	43226.9	0	43226.9	0.869238
60	23763.3	30877.1	0.769611			120	35513.7	37681	0	37681	0.942485								180	22526.2	46202.4	0	46202.4	0.487555
180	9171.85	44739.4	0.205006			180	22526.2	46202.4	0	46202.4	0.487555
bat2 #1			bat2/rRNA				#2 bat2	Glu	15637.7	44290.7	0	44290.7	0.353069		bat2 #1			bat2/rRNA		#2 bat2	Glu	15637.7	44290.7	0	44290.7	0.353069
Glucose	16675.3	31801.1	0.524363					60	40626.5	43425.6	0	43425.6	0.935543		Glucose	16675.3	31801.1	0.524363			60	40626.5	43425.6	0	43425.6	0.935543
5	15657	31812.7	0.49216					120	36924.5	39326.5	0	39326.5	0.93892		60	34582.7	29333.1	1.17896			180	26053.1	44581.1	0	44581.1	0.584399
30	26525.2	33381.1	0.794616					180	26053.1	37581.1	0	37581.1	0.693251		180	14143.1	33630.1	0.420547
60	34582.7	29333.1	1.17896
180	14143.1	29630.1	0.47732

## Sheet: Supplementary File 3F
Supplementary File 3F. Figure 4C
HMS2
s		main band		top band		rRNA			s	main/rRNA		top/rRNA	main/top	top/main		HMS2:URA3 #3	sense								s	s
HMS2	1	9868.75		1	21016.1	1	31681		HMS2	0.311504		0.663366	0.469581	2.12956			main			top		rRNA			main/rRNA	top/rRNA	main/top	top/ main
HMS2:URA3	2	33264		2	34085.7	2	30619.9		HMS2:URA3	1.08635		1.11319	0.975895	1.0247		HMS2	1	20460.5		1	42264.1	1	62673.9	HMS2	0.32646	0.67435	0.484111	2.06564
																HMS2:URA3	2	70009.8		2	71542.6	2	60901.7	HMS2:URA3	1.14956	1.17472	0.978576	1.02189
as									as	as/rRNA												AS/rRNA				1.74201
HMS2	1	35573.4				1	31596.1		HMS2	1.12588						AS	1	73799.5	rRNA	1	65217.8	1.13158
HMS2:URA3	2	3925.57				2	25594.5		HMS2:URA3	0.153375							2	10579.4		2	50897.6	0.207856
																		main		top		rRNA		main/rRNA	top/rRNA	main/top	top/main
																BAT2	1	79023.1		1	59129.1	1	69080.7	1.14392	0.855943	1.33645	0.748251
bat2s		main		top band		rRNA			bat2s	main/rRNA		top/rRNA	main/top	top/main			2	34327.9		2	77068.9	2	66470.5	0.516438	1.15944	0.445418	2.24508
HMS2	1	39572.2		1	30663.4		1	34056.2	HMS2	1.16197		0.900377	1.29053	0.774873
HMS2:URA3	2	18185.4		2	38574.1		2	33351.7	HMS2:URA3	0.545261		1.15659	0.47144	2.12116
	#1S	#2		average	AVEDEV					s	as	bat2
	main/rRNA									top/rRNA	as/rRNA	main/rRNA	top/rRNA
AS	1.12588	1.13159	WT HMS2 AS	1.12873	0.002853
AS	0.153375	0.207856	HMS2:URA3 AS	0.180616	0.0272405
S	0.311504	0.32646	WT HMS2 S	0.318982	0.007478
S	1.08635	1.14956	HMS2:URA3 S	1.11795	0.031601
BAT2	1.16197	1.14393	WT BAT2 S	1.15295	0.0090215
BAT2	0.545261	0.516438	HMS2:URA3 BAT2 S	0.530849	0.0144115
			WT HMS2 S	0.318982	0.007478
			HMS2:URA3 S	1.11795	0.031601
			WT HMS2 AS	1.12873	0.002853											Relative Fold Increase in Readthrough Transcript URA3/WT
			HMS2:URA3 AS	0.180616	0.0272405											S #1	1.74201
			WT BAT2 S	1.15295	0.0090215											S#2	1.67809
			HMS2:URA3 BAT2 S	0.530849	0.0144115											B2 #1
			rt	0.251881	0.0485404											B2 #2
			rt	1.31213	0.0238429
																S #1
	c1 nos 2		c1	bat2	rrna	b2/rRNA	c1/rrna	c1/rRNA	Ave c1	sdev						S#2
	8492.81		12547.5	45358.1	41766.5	1.08599	0.300421	0.20334	0.251881	0.0485404						B2 #1
	40731		42238.7	18222	31616.5	0.576347	1.33597	1.28829	1.31213	0.0238429						B2 #2
bat2 for ura3T		rrna				readthrough	read/rrna									hms2 ura and t		rrna	readthrough	hms2/r		hms2/r		read/r
1	20876.7	10974.7	1.90226	1.93904	0.0367817	16943.1	1.54383	2.06872	0.524888	BAT2 ura3 and t		readthrough					11086.8	1	12615.1	8546.35	0.87885	0.864303	0.0145476	0.67747	0.585775	0.0916946
2	15406.2	7797.37	1.97582			20223.3	2.59361			1.93904	0.0367817	2.06872	0.524888				10163.2	2	11960.1	5909.28	0.849755			0.494081
3	35434.9	9214.97	3.84537	3.36622	0.47915	5772.05	0.626378	0.541802	0.0845758	3.36622	0.47915	0.541802	0.0845758				19697.2	3	9016.76	1172.23	2.18451	2.0292	0.155311	0.130006	0.119885	0.0101213
4	28491.7	6036.32	2.88707			2759.96	0.457226										17895.5	4	9549.93	1048.23	1.87389			0.109763
												bat2 then c1				HMS2 a and c1
												1.93904	0.0367817			0.864303	0.0145476
												3.36622	0.47915			2.0292	0.155311
												2.06872	0.524888			0.585775	0.0916946
												0.541802	0.0845758			0.119885	0.0101213

## Sheet: Supplementary File 3G
Supplementary File 3G; Figure 4F
													c1 nos 2		c1	bat2	rrna	b2/rRNA	c1/rrna	c1/rRNA	Ave c1	sdev
													8492.81		12547.5	45358.1	41766.5	1.08599	0.300421	0.20334	0.251881	0.0485404
													40731		42238.7	18222	31616.5	0.576347	1.33597	1.28829	1.31213	0.0238429

## Sheet: Supplementary File 3B
Supplementary File 3B. Source Data for Figure 2 Supplement 1B
WT HMS2
	sense	rRNA	HMS2 (A)	as	rRNA	SUT650 (B)	BAT2	rRNA	BAT2 (D)
Glu	12929.4	16837	0.767917	13284.7	26505.5	0.501205	6628.12	13374.8	0.495567
Gal 5	8426	22044.4	0.382229	13537.1	27563.5	0.491124	4212.98	13476.7	0.312612
Gal 30	7356	25900.4	0.284012	22483	28217	0.796789	15642.1	21002.2	0.744781
Gal 60	7328.3	27537.5	0.26612	24209.3	26143	0.926034	26400.6	22830.8	1.15636
Glu 60	15015.6	27799.9	0.540131	13385.8	24424.4	0.548049	9043.71	25037.5	0.361206
Glu 120	21308	28271.1	0.7537	13212.8	22507.5	0.587042	6207.83	26063.6	0.23818
n=1

## Sheet: Supplementary File 3IA
Supplementary File 3IA: Figure 5F GAL 4 anchor away																										Supplementary File 2I. Figure 5F																						AA #2 GAL:HMS2
																	Censored																Average	Avedev	Average	Avedev
GAL:HMS2 AA G4 S		rRNA															GAL:HMS2 AA G4 S		rRNA														GAL:HMS2 sense		GAL:HMS2 antisense		BAT2	Readthrough								GAL:HMS2 S			readthrough 1
#1	Main		Main/rRNA	AS	rRNA	as/rRNA			#2								#1	Main		Main/rRNA	AS	rRNA	as/rRNA		#2							Glu	0.0472372	0.0196296	0.685765	0.148575	0.541353	0.0453308								Glu	525.092		1
Glu	1300.94	19455.7	0.0668668	15237	28364.3	0.53719			GAL:HMS2 S		rRNA	AS	rRNA	s/rRNA	AS/rRNA		Glu	1300.94	19455.7	0.0668668	15237	28364.3	0.53719		GAL:HMS2 S		rRNA	AS	rRNA	s/rRNA	AS/rRNA	Gal 30	0.0415071	0.0175381	0.872733	0.016593	1.26657	0.0038331					Gal 30	548.849		2	742.355	0.0324197	0.943201
Gal 5	1868.23	24110.5	0.0774862	17854.2	26963.7	0.662159			Glu	525.092	19019.8	20642.1	24740.6	0.0276076	0.83434		Gal 30	1486.77	25180.2	0.0590451	23511.4	26437.3	0.889326		Glu	525.092	19019.8	20642.1	24740.6	0.0276076	0.83434	Gal 60	0.0404305	0.00879463	0.782153	0.112205	1.7414	0.00840877		Gal 60	804.263		3	781.113	0.0307253	0.893905	1344.98	0.0529052	0.427338
Gal 30	1486.77	25180.2	0.0590451	23511.4	26437.3	0.889326			Gal 30	548.849	22898.3	21464.4	25071.1	0.023969	0.85614		Gal 60	1368.65	27803.8	0.0492252	21677.1	24237.6	0.894358		Gal 30	548.849	22898.3	21464.4	25071.1	0.023969	0.85614	Gal 240 + DMSO	0.968335	0.010846	0.262993	0.0885978	0.233029	0.423046		Gal180	12585.6		4	11283.8	0.445393	12.958	11921.4	0.470563	3.80094
Gal 60	1368.65	27803.8	0.0492252	21677.1	24237.6	0.894358			Gal 60	804.263	25422.5	17251.2	25750	0.0316359	0.669949		Gal 240 +DMSO	26262.6	27428.6	0.957489	7672.18	21821.3	0.35159		Gal 60	804.263	25422.5	17251.2	25750	0.0316359	0.669949	Gal 240 + RAP	0.0336029	0.00350987	1.09417	0.00661977	1.29503	0.0277068		Gal 240 + DMSO	24829.6		5	24693.7	0.973822	28.3319	22985.5	0.906456	7.32183
Gal 240 +DMSO	26262.6	27428.6	0.957489	7672.18	21821.3	0.35159			Gal180	12585.6	25334.4	4650.13	23176.1	0.49678	0.200643		Gal 240 + Rap	948.234	25550.1	0.0371128	17479.1	16072.1	1.08755		Gal 240 + DMSO	24829.6	25357.5	3721.36	21338.7	0.979181	0.174395									Gal 240 + AP	702.627		6	1208.01	0.0517384	1.50525	1621.22	0.069436	0.560864
Gal 240 + Rap	948.234	25550.1	0.0371128	17479.1	16072.1	1.08755			Gal 240 + DMSO	24829.6	25357.5	3721.36	21338.7	0.979181	0.174395										Gal 240 + AP	702.627	23348.5	20466.3	18592.4	0.0300931	1.10079
									Gal 240 + AP	702.627	23348.5	20466.3	18592.4	0.0300931	1.10079
AS					rRNA				AS		AS/rRNA
Glu	1	15237	1	15176.6		1	27069.6		Glu		0.560651
Gal	2	17854.2	2	17731.2		2	28391.2		Gal		0.624534
Gal	3	23511.4	3	23503.1		3	27749.9		Gal		0.846961
Gal	4	21677.1	4	21466.8		4	27413.5		Gal		0.783072
Gal	5	7672.18	5	6982.35		5	24886.5		Gal		0.280568																						#2
Gal	6	17479.1	6	17161		6	19895.3		Gal		0.862561
																Ratio of readthrough at BAT2
BAT2	main band			top band			rRNA		BAT2		Main/rRNA		top/rRNA			top/main				BAT2	main band	top band	rRNA	BAT2 sense	HMS2:BAT2 Read-through		GAL:HMS2:BAT2 read-through
	1	6332.47	1	1	11697.5		1	17987	Glu		0.352058	1	0.650331	1	Glu	1.84722				Glu	6332.47	11697.5	17987	0.541353	0.650331	0.605	0.0453308
	2	5863.1	0.92588	2	7017.59		2	22583.3	Gal		0.259621	0.737438	0.310742	0.477822	Gal	1.19691				Gal 30	14008.9	11060.5	25172.9	1.26657	0.439383	0.43555	0.0038331
	3	14008.9	2.21223	3	11060.5		3	25172.9	Gal		0.556508	1.58073	0.439383	0.67563	Gal	0.789536				Gal 60	24428.2	14027.9	27835.4	1.7414	0.503959	0.49555	0.00840877
	4	24428.2	3.85762	4	14027.9		4	27835.4	Gal		0.877596	2.49276	0.503959	0.774927	Gal	0.574249				Gal 240 +DMSO	5837.64	25051.1	29176.9	0.233029	0.858596	0.43555	0.423046
	5	5837.64	0.921859	5	25051.1		5	29176.9	Gal		0.200078	0.568308	0.858596	1.32024	Gal +DMSO	4.29131				Gal 240 + Rap	18959	14639.8	25991.4	1.29503	0.563257	0.53555	0.0277068
	6	18959	2.99393	6	14639.8		6	25991.4	Gal		0.729432	2.07191	0.563257	0.866108	Gal +RAP	0.772186
#1
[truncated: 18 more columns]

## Sheet: Supplementary File 3IB
Supplementary File 3IB. Figure 5F AA #2 GAL:HMS2
GAL:HMS2 S			readthrough 1		1/rRNA		readthrough 2			vertical 5	% total	vertical 4		% total	vetical 3		% total	rRNA			AS
1	525.092		1	653.749	0.034372	1	2354.69	0.123802	1	799.335	0.0149533	1	923.749	0.0171478	1	8785.57	0.10575	1	19019.8		1	20642.1
2	548.849		2	742.355	0.0324197	0.943201	1267.89	0.0553705	0.447251	4499.84	0.0841794	2	4319.96	0.0801924	2	9807.27	0.118047	2	22898.3		2	21464.4
3	804.263		3	781.113	0.0307253	0.893905	1344.98	0.0529052	0.427338	11694.9	0.218779	3	11655.2	0.216359	3	19806.9	0.23841	3	25422.5		3	17251.2
4	12585.6		4	11283.8	0.445393	12.958	11921.4	0.470563	3.80094	29689.6	0.555409	4	27685.9	0.51394	4	30421.5	0.366175	4	25334.4		4	4650.13
5	24829.6		5	24693.7	0.973822	28.3319	22985.5	0.906456	7.32183	6771.71	0.12668	5	9285.08	0.172361	5	14257.8	0.171618	5	25357.5		5	3721.36
6	702.627		6	1208.01	0.0517384	1.50525	1621.22	0.069436	0.560864	53455.3			53869.9			83079		6	23348.5		6	20466.3
										This shows that the relative proportion of readthrough 1 and 2 relative to sense remain similar during induction
		main/rRNA	AS/rRNA	main relative	AS relative
Glu	1	0.0276076	1.08529	1	1
Gal 1	2	0.023969	0.937378	0.868202	0.863712
GAL 2	3	0.0316359	0.67858	1.14591	0.625252
Gal 3	4	0.49678	0.18355	17.9943	0.169126
DMSO	5	0.979181	0.146755	35.4678	0.135222
AA DMSO +Rap	6	0.0300931	0.876558	1.09003	0.807671
