# Supplementary material for: Transcription mediated insulation and interference direct gene cluster expression switches
Source: eLife journal article supplement (doi:10.7554/elife.03635), 2014-11-19
Supplement: supp [file elife_poa_e03635_Supplementary_File_4.xlsx]

## Sheet: Run 1
Excel Analysed Data Export
(C)Copyright 2003 Corbett Research, Pty Ltd. (R) All Rights Reserved.				TEMPLATE
Quantitative analysis of Cycling A.FAM/Sybr (Page 1)
									RESULT	IP/H3					ERROR	Error/H3
No.	Name	Type	Ct	Calc Conc (Copies)		Av	IP-N	30T	IP-N/30T		SEM		SEM (IP-N)		SEM(IP-N/30T)
	A6	BY4741 T	Unknown	25.13		1359		40310			52.5241
	A7	BY4741 T	Unknown	25.04		1426
	A8	BY4741 T	Unknown	25.29		1246
	B1	By4741 N	Unknown	32.29		28					10.3494
	B2	By4741 N	Unknown	30.95		58
	B3	By4741 N	Unknown	32.4		26
	B4	BY4741 H3	Unknown	29.5		127	89.6667		0.222443		5.19615		11.5806		0.030016
	B5	BY4741 H3	Unknown	29.64		118
	B6	BY4741 H3	Unknown	29.38		136
	B7	BY4741 K4me3	Unknown	24.47		1948	1862.67		4.62086	20.7732	57.761		58.6809		0.231989	2.99083
	B8	BY4741 K4me3	Unknown	24.63		1785
	C1	BY4741 K4me3	Unknown	24.45		1967
	C2	BY4741 K36me3	Unknown	27.35		407	420		1.04193	4.68401	26.181		28.1524		0.0808482	0.729102
	C3	BY4741 K36me3	Unknown	26.99		495
	C4	BY4741 K36me3	Unknown	27.09		470
	C5	BY4741 K56ac	Unknown	24.46		1961	1859		4.61176	20.7323	33.627		35.1836		0.200292	2.93892
	C6	BY4741 K56ac	Unknown	24.53		1880
	C7	BY4741 K56ac	Unknown	24.57		1848
	C8	BY4741 K79me3	Unknown	28.59		208	180		0.446539	2.00743	11.392		15.3912		0.0419828	0.330147
	D1	BY4741 K79me3	Unknown	28.33		240
	D2	BY4741 K79me3	Unknown	28.62		204
	D3	Ura3 T	Unknown	24.34		2085		63130			21.881
	D4	Ura3 T	Unknown	24.35		2080
	D5	Ura3 T	Unknown	24.29		2148
	D6	Ura3 N	Unknown	29.69		114					8.88819
	D7	Ura3 N	Unknown	30.08		93
	D8	Ura3 N	Unknown	30.27		84
	E1	Ura3 H3	Unknown	28.18		259	142		0.224933		12.5033		15.3406		0.0244123
	E2	Ura3 H3	Unknown	28.31		242
	E3	Ura3 H3	Unknown	28.52		216
	E4	Ura3 K4me3	Unknown	24.77		1657	1391		2.20339	9.79577	85.773		86.2322		0.138503	1.22859
	E5	Ura3 K4me3	Unknown	25.11		1378
	E6	Ura3 K4me3	Unknown	25.04		1429
	E7	Ura3 K36me3	Unknown	38.2		1	-96		-0.152067	-0.676056	#DIV/0!		#DIV/0!		#DIV/0!	#DIV/0!
	E8	Ura3 K36me3	Unknown	42.86
	F1	Ura3 K36me3	Unknown	45.52
	F2	Ura3 K56ac	Unknown	24.16		2307	2238		3.54507	15.7606	21.8251		23.5655		0.0524615	1.72635
	F3	Ura3 K56ac	Unknown	24.15		2320
	F4	Ura3 K56ac	Unknown	24.1		2378
	F5	Ura3 K79me3	Unknown	25.65		1023	887.667		1.40609	6.25117	33.4581		34.6186		0.0567526	0.723846
	F6	Ura3 K79me3	Unknown	25.86		918
	F7	Ura3 K79me3	Unknown	25.67		1013
	RESULT				ERROR
	BY4741	Ura3			BY4741	Ura3
H3	0.222443	0.224933			0.030016	0.0244123
K4me3	4.62086	2.20339			0.231989	0.138503
K36me3	1.04193	-0.152067			0.0808482	#DIV/0!
K56ac	4.61176	3.54507			0.200292	0.0524615
K79me3	0.446539	1.40609			0.0419828	0.0567526
K4me3/H3	20.7732	9.79577			2.99083	1.22859
K36me3/H3	4.68401	-0.676056			0.729102	#DIV/0!
K56ac/H3	20.7323	15.7606			2.93892	1.72635
K79me3/H3	2.00743	6.25117			0.330147	0.723846
	CORRECT FOR TUB2
	BY4741	Ura3			Error					TUB2
(K4me3/H3) /TUB2	0.672154	0.160271			0.098652	0.0220558					BY4741	Ura3				BY4741	Ura3
(K36me3/H3) /TUB2	0.212103	1.08541			0.0333254	#DIV/0!				H3	0.32351	0.17507				0.0108273	0.0185596
(K56ac/H3) /TUB2	2.41074	1.14777			0.348833	0.140454				K4me3	9.99824	10.7003				0.409164	0.330835
(K79me3/H3) /TUB2	0.203107	0.391958			0.0337965	0.05119				K36me3	7.14429	-0.109044				0.131945	-0.00103564
										K56ac	2.78219	2.40396				0.118837	0.0960428
										K79me3	3.19746	2.79212				0.0913133	0.166788
										K4me3/H3	30.9055	61.12				1.63386	6.74944
										K36me3/H3	22.0836	-0.622857				0.844165	-0.0662952
										K56ac/H3	8.6	13.7314				0.466668	1.55565
										K79me3/H3	9.88364	15.9486				0.434845	1.94069

## Sheet: Supplementary File 3
					Supplementary File 3: Figure 3G
		CORRECT FOR TUB2
		BY4741	Ura3			Error					n=3					n=2 (run 1 and 2)
	(K4me3/H3) /TUB2	0.672154	0.160271			0.098652	0.0220558
	(K36me3/H3) /TUB2	0.212103	1.08541			0.0333254	#DIV/0!					HMS2	HMS2:URA3			HMS2		HMS2:URA3
	(K56ac/H3) /TUB2	2.41074	1.14777			0.348833	0.140454			(K4me3/H3) /TUB2	0.777402	1.14631	0.137464	0.00609469	(K4me3/H3) /TUB2	0.563259	0.108895	0.154176	0.00609469
	(K79me3/H3) /TUB2	0.203107	0.391958			0.0337965	0.05119			(K36me3/H3) /TUB2	0.105275	0.235521	0.639984	0.296952	(K36me3/H3) /TUB2	0.156565	0.0555382	0.790105	0.295307
										(K56ac/H3) /TUB2	1.17205	2.96635	1.08379	0.115222	(K56ac/H3) /TUB2	2.08731	0.323423	1.17021	0.0224382
										(K79me3/H3) /TUB2	0.169285	0.326367	0.460119	0.145491	(K79me3/H3) /TUB2	0.199403	0.00370353	0.535157	0.143199
		Normalised for Tub2
	K4	0.454364	0.148082			0.102482	0.0926573
	K36	0.101027	0.494798			0.0229748	0.308943
	K56	1.76389	1.19265			0.429599	0.744652
	K79	0.1957	0.678355			0.0463848
		Normalised for Tub2
	K4	2.31241	0.10404			0.681597	0.0989636
	K36	0.393434	0.339743			0.115919	0.323521
	K56	4.72442	0.910961			1.39413	0.86545
	K79	0.580294	0.310043			0.18857	0.296175

## Sheet: Run 2
Excel Analysed Data Export
(C)Copyright 2003 Corbett Research, Pty Ltd. (R) All Rights Reserved.				TEMPLATE
Quantitative analysis of Cycling A.FAM/Sybr (Page 1)
									RESULT	IP/H3					ERROR	Error/H3
No.	Name	Type	Ct	Calc Conc (Copies)		Av	IP-N	30T	IP-N/30T		SEM		SEM (IP-N)		SEM(IP-N/30T)
	6	BY4741 T	Unknown	21.22		1270		39640			25.9829
	7	BY4741 T	Unknown	21.12		1340
	8	BY4741 T	Unknown	21.1		1354
	9	By4741 N	Unknown	29.95		11					6.245
	10	By4741 N	Unknown	29.13		17
	11	By4741 N	Unknown	27.98		32
	12	BY4741 H3	Unknown	26.97		56	58		0.146317		11.1355		12.7671		0.032336
	13	BY4741 H3	Unknown	26.17		86
	14	BY4741 H3	Unknown	26.04		92
	15	BY4741 K4me3	Unknown	21.01		1427	1349.67		3.40481	23.2701	33.7951		34.3673		0.109541	5.1969
	16	BY4741 K4me3	Unknown	21.08		1372
	17	BY4741 K4me3	Unknown	21.16		1310
	18	BY4741 K36me3	Unknown	24.16		257	225		0.567608	3.87931	7.57188		9.81495		0.0271597	0.877191
	19	BY4741 K36me3	Unknown	24.24		247
	20	BY4741 K36me3	Unknown	24.35		231
	21	BY4741 K56ac	Unknown	20.68		1707	1415.33		3.57047	24.4023	136.209		136.352		0.351067	5.90257
	22	BY4741 K56ac	Unknown	21.2		1282
	23	BY4741 K56ac	Unknown	21.15		1317
	24	BY4741 K79me3	Unknown	24.46		218	192.333		0.4852	3.31609	13.2958		14.6894		0.0382655	0.778121
	25	BY4741 K79me3	Unknown	24.75		187
	26	BY4741 K79me3	Unknown	24.35		232
	27	Ura3 T	Unknown	21.26		1246		36350			25.4318
	28	Ura3 T	Unknown	21.38		1162
	29	Ura3 T	Unknown	21.28		1227
	30	Ura3 N	Unknown	25.97		96					9.26163
	31	Ura3 N	Unknown	25.66		114
	32	Ura3 N	Unknown	26.26		82
	33	Ura3 H3	Unknown	25.89		100	33		0.090784		17.9103		20.1632		0.0555024
	34	Ura3 H3	Unknown	25.43		129
	35	Ura3 H3	Unknown	25		162
	36	Ura3 K4me3	Unknown	22.93		502	434		1.19395	13.1515	42.4513		43.4498		0.122131	8.15217
	37	Ura3 K4me3	Unknown	22.56		615
	38	Ura3 K4me3	Unknown	23.02		477
	39	Ura3 K36me3	Unknown	21.97		843	925		2.5447	28.0303	93.04		93.4999		0.262708	17.3794
	40	Ura3 K36me3	Unknown	21.54		1069
	41	Ura3 K36me3	Unknown	21.4		1155
	42	Ura3 K56ac	Unknown	22.04		812	816.667		2.24668	24.7475	83.2827		83.796		0.235299	15.3502
	43	Ura3 K56ac	Unknown	21.63		1016
	44	Ura3 K56ac	Unknown
	45	Ura3 K79me3	Unknown	15.23		32906	60761		167.155	1841.24	45035		45035		123.942	1769.47
	46	Ura3 K79me3	Unknown	12.45		148986
	47	Ura3 K79me3	Unknown	22.36		683	Just using 47:		1.61119	17.7475
	RESULT					ERROR
	BY4741	Ura3				BY4741	Ura3
H3	0.146317	0.090784				0.032336	0.0555024
K4me3	3.40481	1.19395				0.109541	0.122131
K36me3	0.567608	2.5447				0.0271597	0.262708
K56ac	3.57047	2.24668				0.351067	0.235299
K79me3	0.4852	167.155	1.61119			0.0382655	123.942
K4me3/H3	23.2701	13.1515				5.1969	8.15217
K36me3/H3	3.87931	28.0303				0.877191	17.3794
K56ac/H3	24.4023	24.7475				5.90257	15.3502
K79me3/H3	3.31609	1841.24	17.7475			0.778121	1769.47
	Normalised for Tub2									Tub2
K4	0.454364	0.148082				0.102482	0.0926573				BY4741	Ura3				BY4741	Ura3
K36	0.101027	0.494798				0.0229748	0.308943			H3	0.177734	0.0923361				0.00625878	0.0140119
K56	1.76389	1.19265				0.429599	0.744652			K4me3	9.10261	8.2006				0.285244	0.389603
K79	0.1957	0.678355				0.0463848				K36me3	6.82477	5.23084				0.0493206	0.15771
										K56ac	2.45884	1.91597				0.0507378	0.0832563
										K79me3	3.01167	2.41574				0.101247	0.103077
										K4me3/H3	51.2147	88.8125				2.41418	14.1222
										K36me3/H3	38.3988	56.65				1.38036	8.76458
										K56ac/H3	13.8344	20.75				0.564646	3.27533
										K79me3/H3	16.9448	26.1625				0.824958	4.12408

## Sheet: Run 3
Excel Analysed Data Export
(C)Copyright 2003 Corbett Research, Pty Ltd. (R) All Rights Reserved.				TEMPLATE
Quantitative analysis of Cycling A.FAM/Sybr (Page 1)
									RESULT	IP/H3					ERROR	Error/H3
No.	Name	Type	Ct	Calc Conc (Copies)		Av	IP-N	30T	IP-N/30T		SEM		SEM (IP-N)		SEM(IP-N/30T)
	6	BY4741 T	Unknown	25.14		1166		33030			34.7898
	7	BY4741 T	Unknown	25.31		1047
	8	BY4741 T	Unknown	25.24		1090
	9	By4741 N	Unknown	33.3		7				error for 2:	0.5
	10	By4741 N	Unknown	33.05		8
	11	By4741 N	Unknown	37.52
	12	BY4741 H3	Unknown	31.29		24	11.8333		0.035826		3.28295		3.32081		0.0101175
	13	BY4741 H3	Unknown	31.48		21
	14	BY4741 H3	Unknown	32.25		13
	15	BY4741 K4me3	Unknown	25.39		997	967.167		2.92815	81.7324	34.4787		34.4823		0.139497	23.4078
	16	BY4741 K4me3	Unknown	25.54		907
	17	BY4741 K4me3	Unknown	25.35		1020
	18	BY4741 K36me3	Unknown	28.54		137	125.833		0.380967	10.6338	4.70225		4.72875		0.018705	3.04809
	19	BY4741 K36me3	Unknown	28.51		139
	20	BY4741 K36me3	Unknown	28.69		124
	21	BY4741 K56ac	Unknown	26.22		591	577.167		1.7474	48.7746	20.1687		20.1749		0.082338	13.9646
	22	BY4741 K56ac	Unknown	26.15		616
	23	BY4741 K56ac	Unknown	26.34		547
	24	BY4741 K79me3	Unknown	29.11		96	88.8333		0.268947	7.50704	12.4141		12.4242		0.038563	2.37763
	25	BY4741 K79me3	Unknown	29.5		75
	26	BY4741 K79me3	Unknown	28.77		118
	27	Ura3 T	Unknown	25.29		1056		30480			73.7767
	28	Ura3 T	Unknown	25.2		1119
	29	Ura3 T	Unknown	25.6		873
	30	Ura3 N	Unknown	31.81		17					13.4825
	31	Ura3 N	Unknown	30.78		33
	32	Ura3 N	Unknown	29.77		63
	33	Ura3 H3	Unknown	29.63		69	23.6667		0.0776465		10.2686		16.9476		0.0558876
	34	Ura3 H3	Unknown	30.46		41
	35	Ura3 H3	Unknown	29.51		74
	36	Ura3 K4me3	Unknown	27.28		303	277.333		0.909886	11.7183	11.5036		17.7232		0.0880141	8.51031
	37	Ura3 K4me3	Unknown	27.27		304
	38	Ura3 K4me3	Unknown	27.1		338
	39	Ura3 K36me3	Unknown	25.99		681	648.333		2.12708	27.3944	44.8144		46.7986		0.217787	19.9161
	40	Ura3 K36me3	Unknown	25.8		766
	41	Ura3 K36me3	Unknown	26.16		611
	42	Ura3 K56ac	Unknown	26.27		573	493.667		1.61964	20.8592	20.8353		24.8171		0.143044	15.1264
	43	Ura3 K56ac	Unknown	26.45		511
	44	Ura3 K56ac	Unknown	26.45		510
	45	Ura3 K79me3	Unknown	27.37		285	218.333		0.716317	9.22535	17.673		22.2286		0.0895776	6.7396
	46	Ura3 K79me3	Unknown	27.76		224
	47	Ura3 K79me3	Unknown	27.52		259
	RESULT					ERROR
	BY4741	Ura3				BY4741	Ura3
H3	0.035826	0.0776465				0.0101175	0.0558876
K4me3	2.92815	0.909886				0.139497	0.0880141
K36me3	0.380967	2.12708				0.018705	0.217787
K56ac	1.7474	1.61964				0.082338	0.143044
K79me3	0.268947	0.716317				0.038563	0.0895776
K4me3/H3	81.7324	11.7183				23.4078	8.51031
K36me3/H3	10.6338	27.3944				3.04809	19.9161
K56ac/H3	48.7746	20.8592				13.9646	15.1264
K79me3/H3	7.50704	9.22535				2.37763	6.7396
	Normalised for Tub2									Tub2
K4	2.31241	0.10404				0.681597	0.0989636				BY4741	Ura3				BY4741	Ura3
K36	0.393434	0.339743				0.115919	0.323521			H3	0.15514	0.0548282				0.0137806	0.0259426
K56	4.72442	0.910961				1.39413	0.86545			K4me3	5.48345	6.17545				0.118916	0.203417
K79	0.580294	0.310043				0.18857	0.296175			K36me3	4.19316	4.42095				0.0421484	0.162769
										K56ac	1.60166	1.25545				0.0478109	0.0395178
										K79me3	2.00699	1.63142				0.0373194	0.0471978
										K4me3/H3	35.3451	112.633				3.23181	53.4224
										K36me3/H3	27.0282	80.6327				2.41615	38.2676
										K56ac/H3	10.3239	22.898				0.967441	10.8584
										K79me3/H3	12.9366	29.7551				1.17403	14.1053
