# Supplementary figures and images for: Transcription mediated insulation and interference direct gene cluster expression switches
Source: eLife journal article supplement (doi:10.7554/elife.03635), 2014-11-19

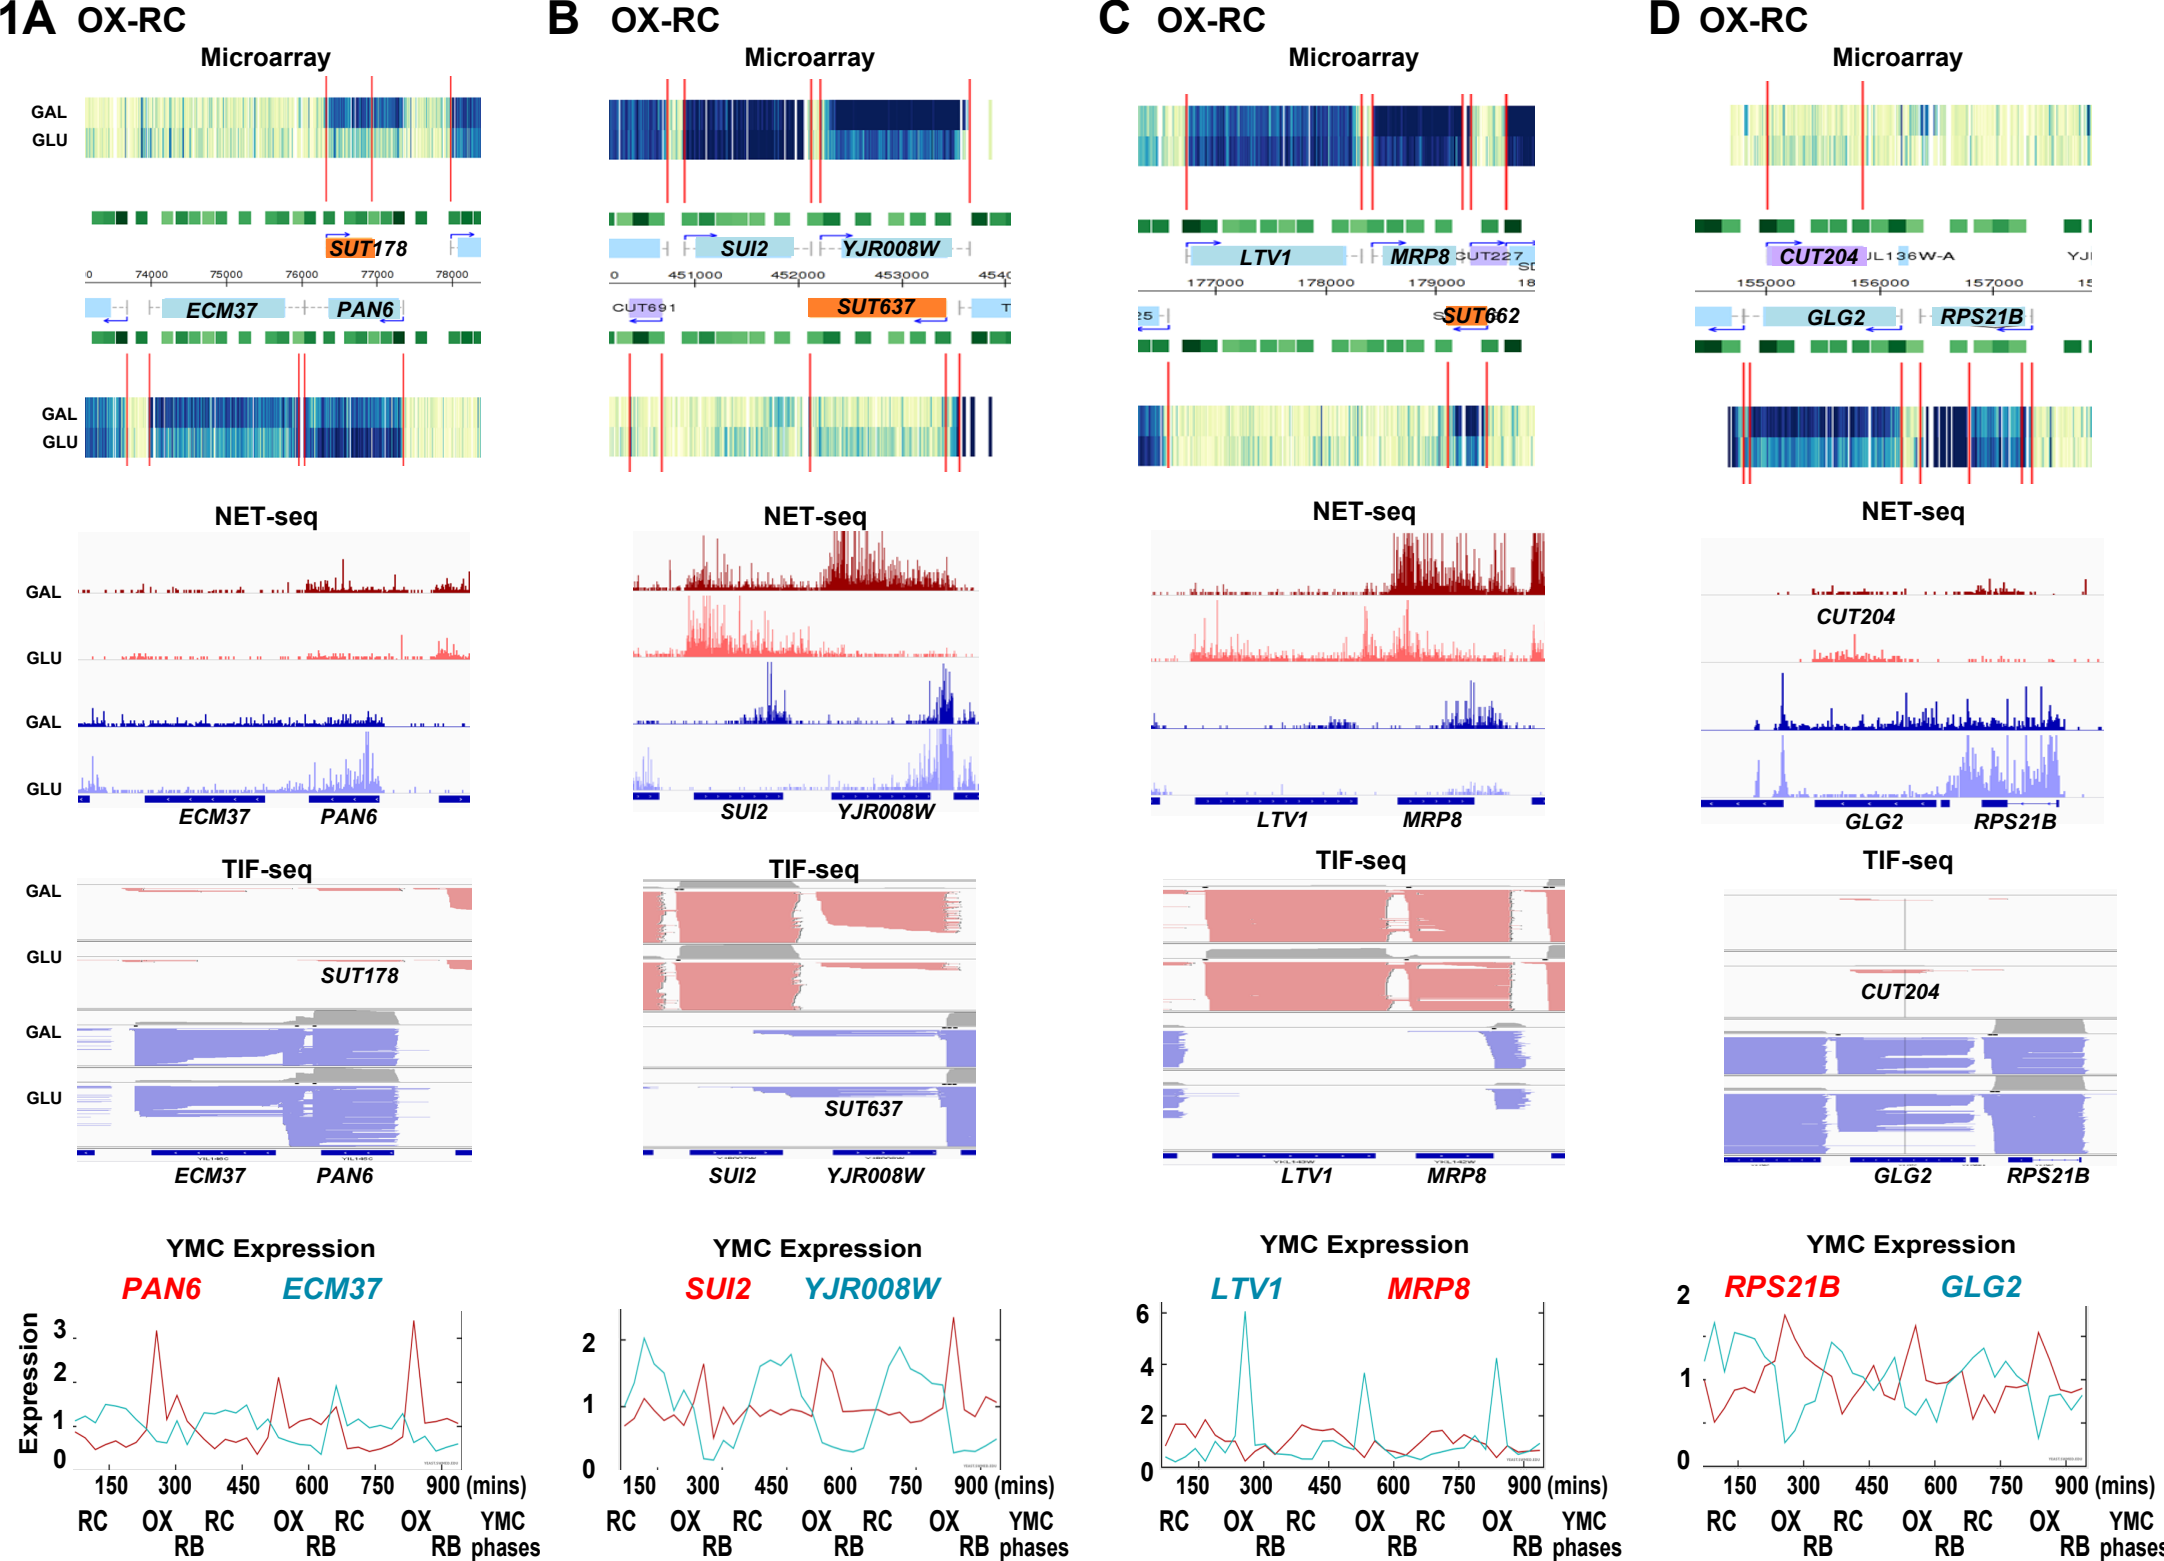

Supplement: supp [file elife_poa_e03635_Figure_1_figure_supplement_1.pdf › elife_poa_e03635_Figure_1_figure_supplement_1.pdf]

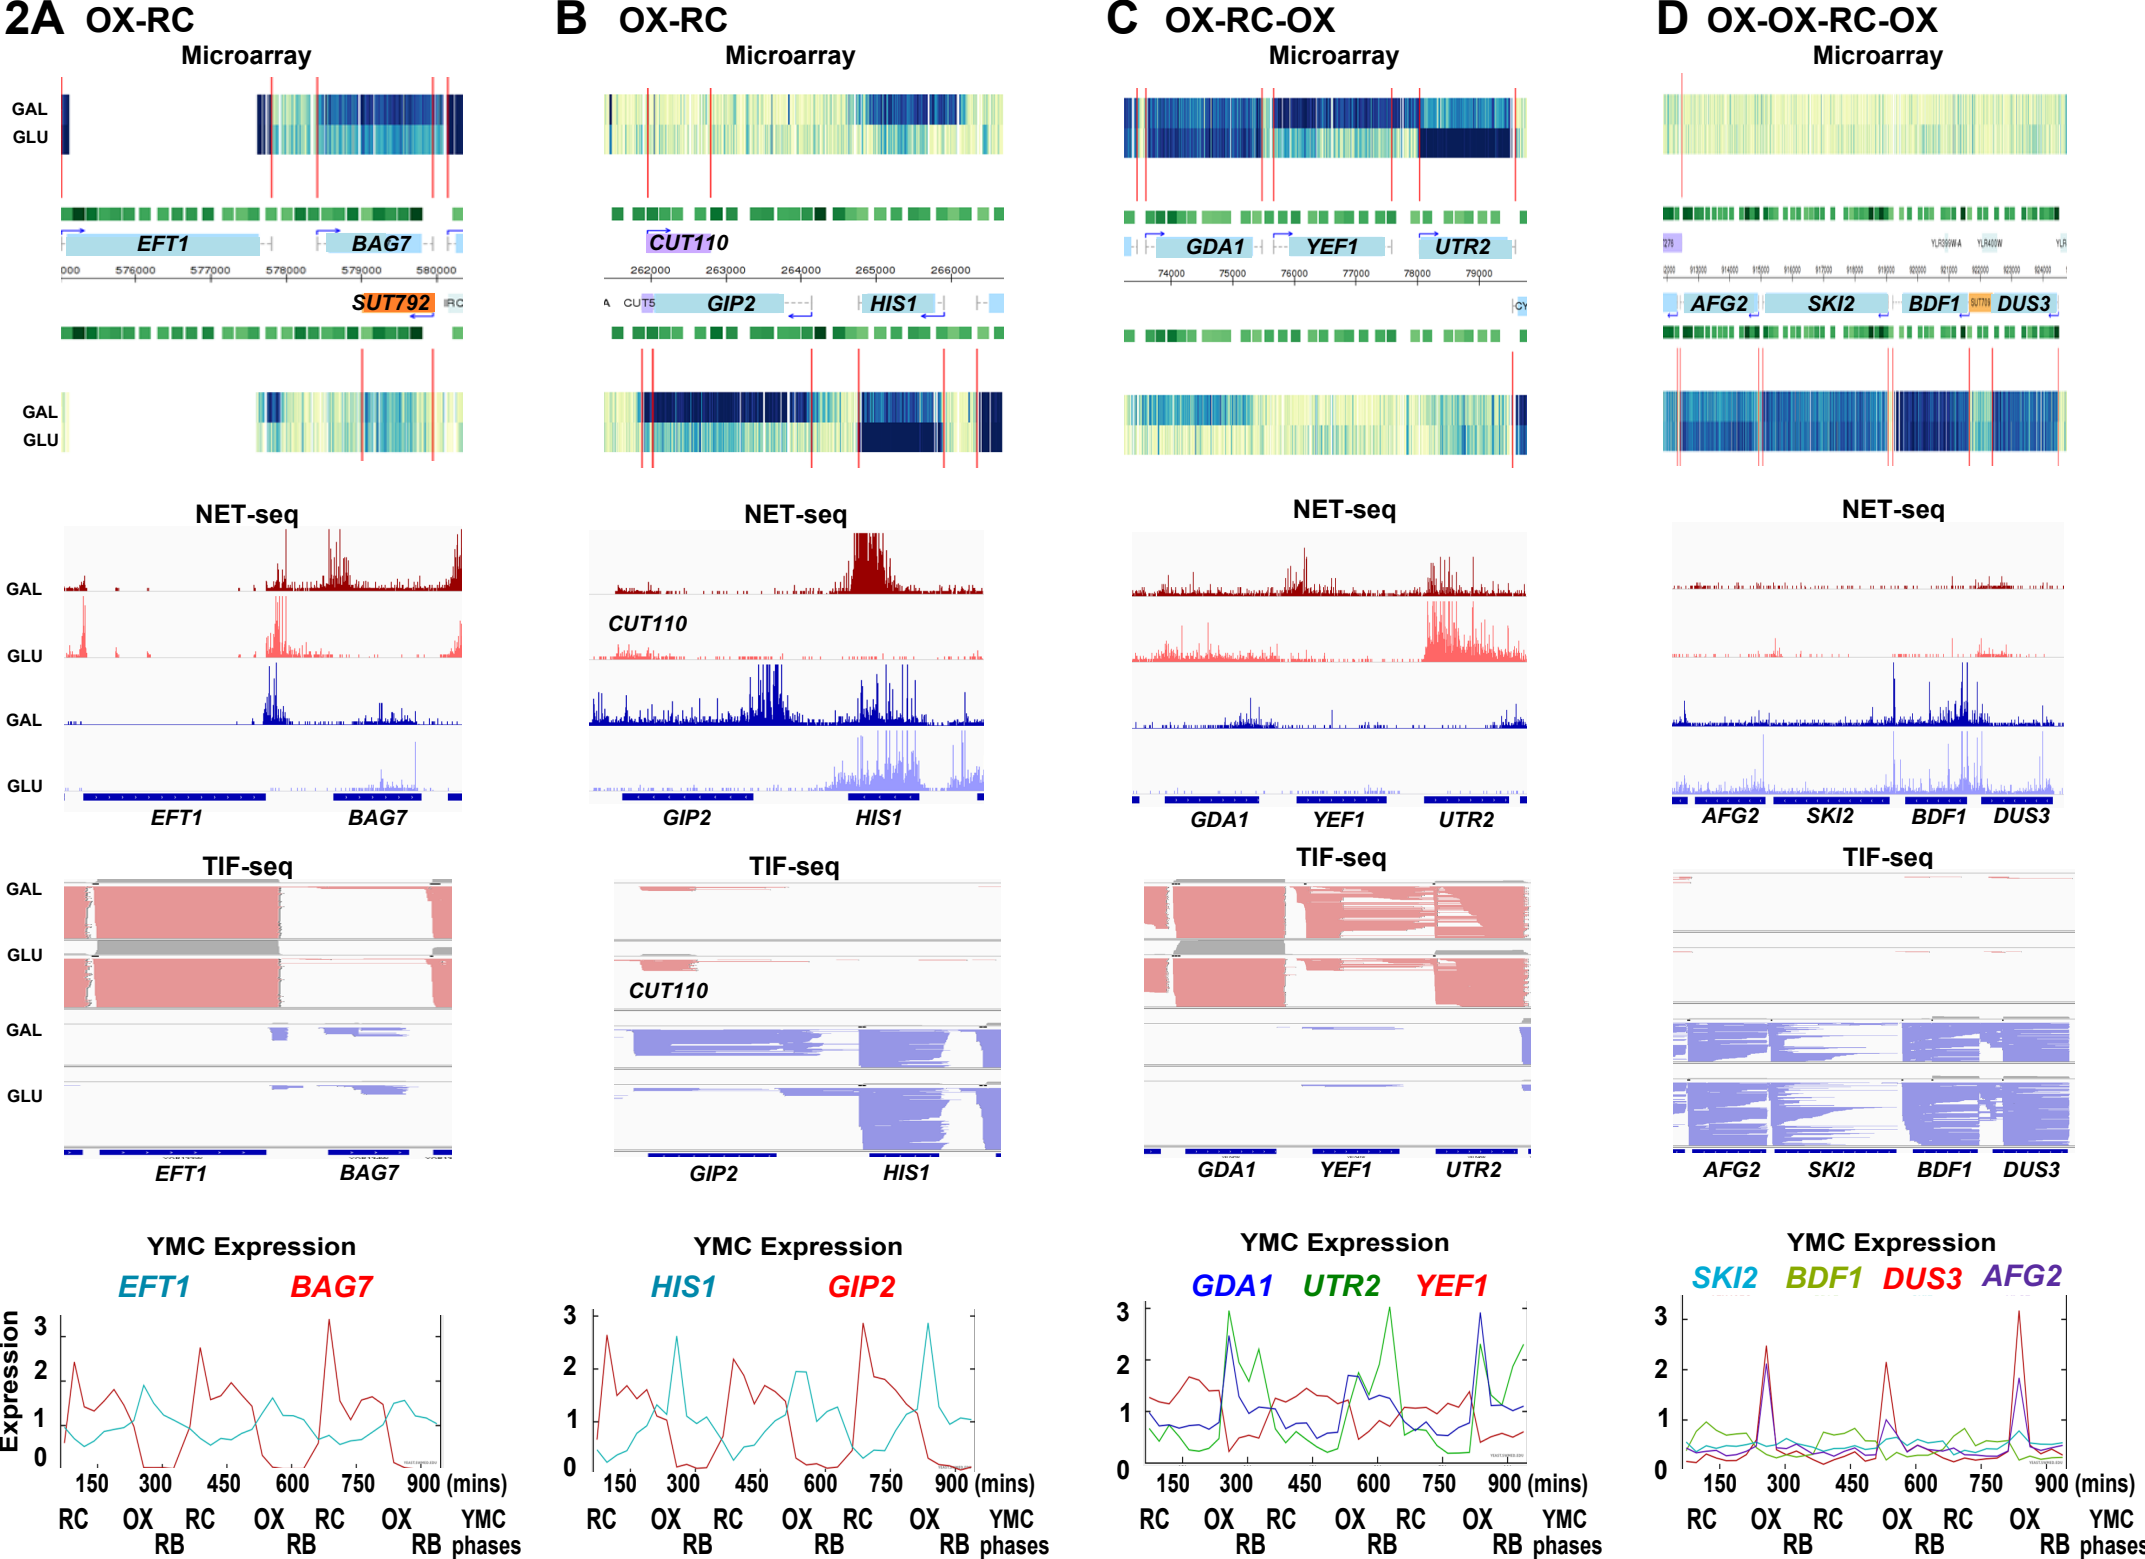

Supplement: supp [file elife_poa_e03635_Figure_1_figure_supplement_2.pdf › elife_poa_e03635_Figure_1_figure_supplement_2.pdf]

**3A RC-OX**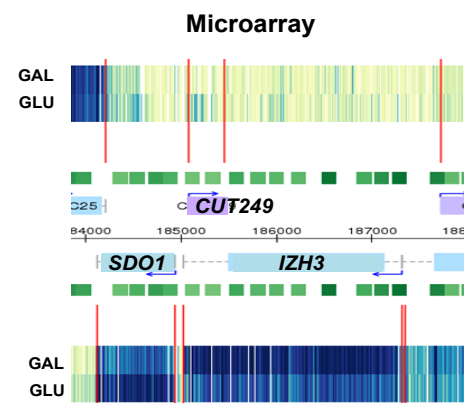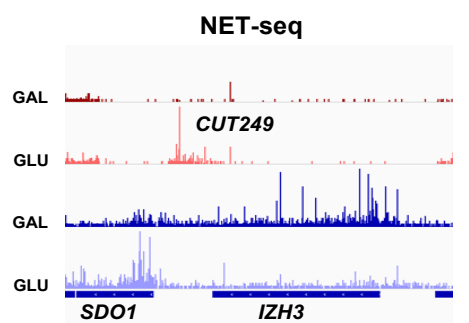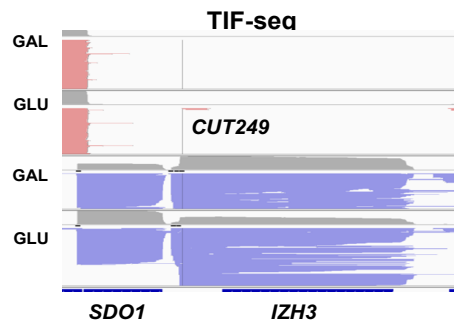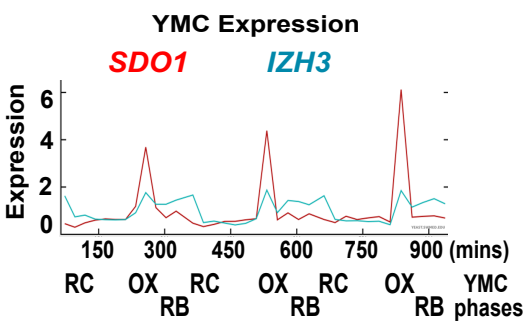**B RC-OX\_OX-RC**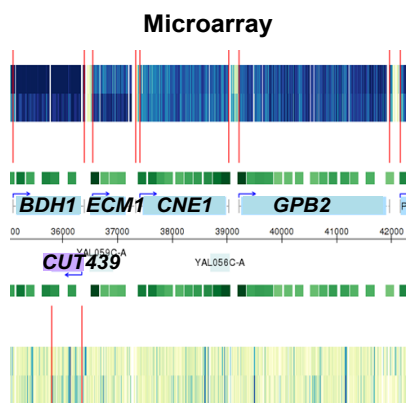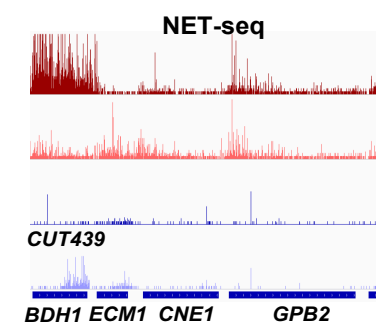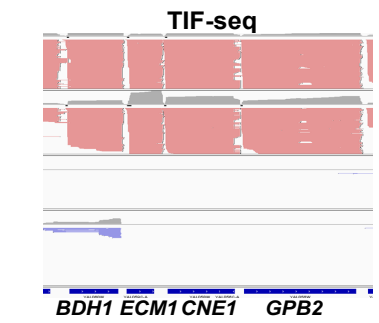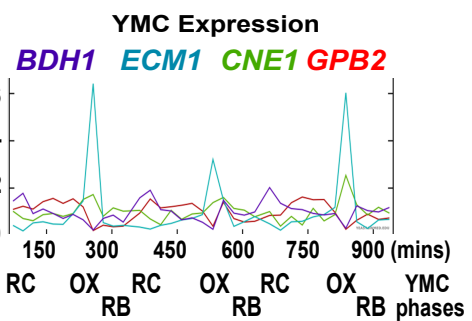**C OX-RC**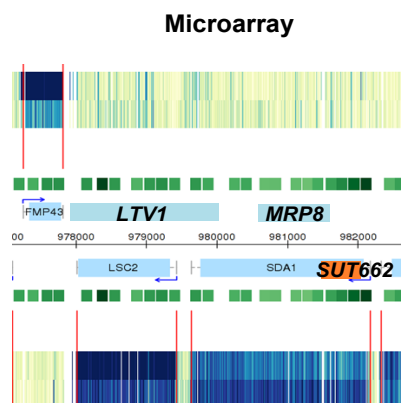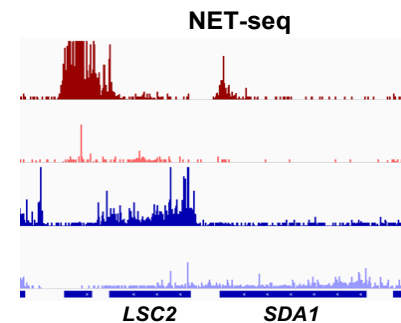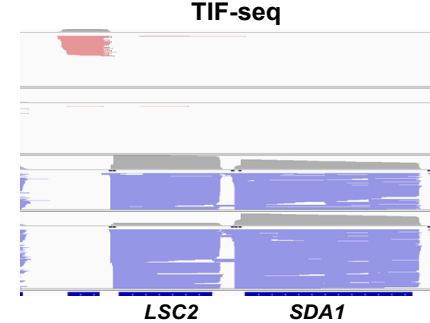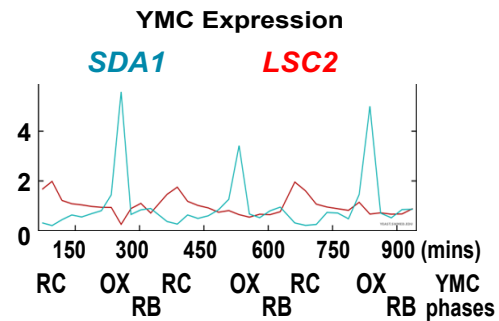**D NC-NC**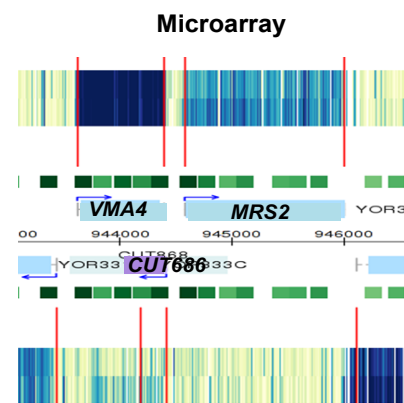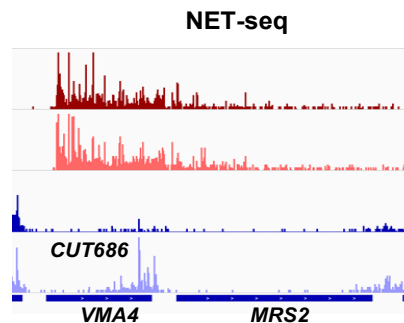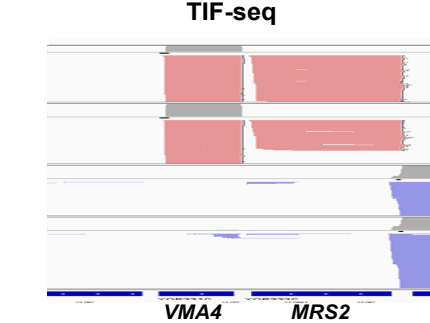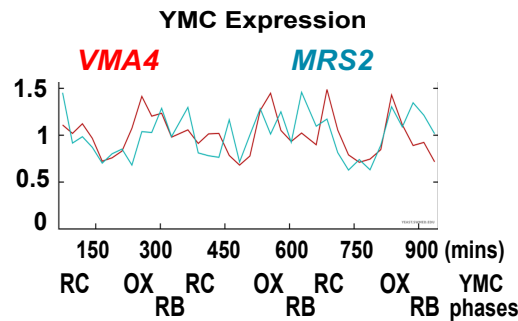

Supplement: supp [file elife_poa_e03635_Figure_1_figure_supplement_3.pdf › elife_poa_e03635_Figure_1_figure_supplement_3.pdf]

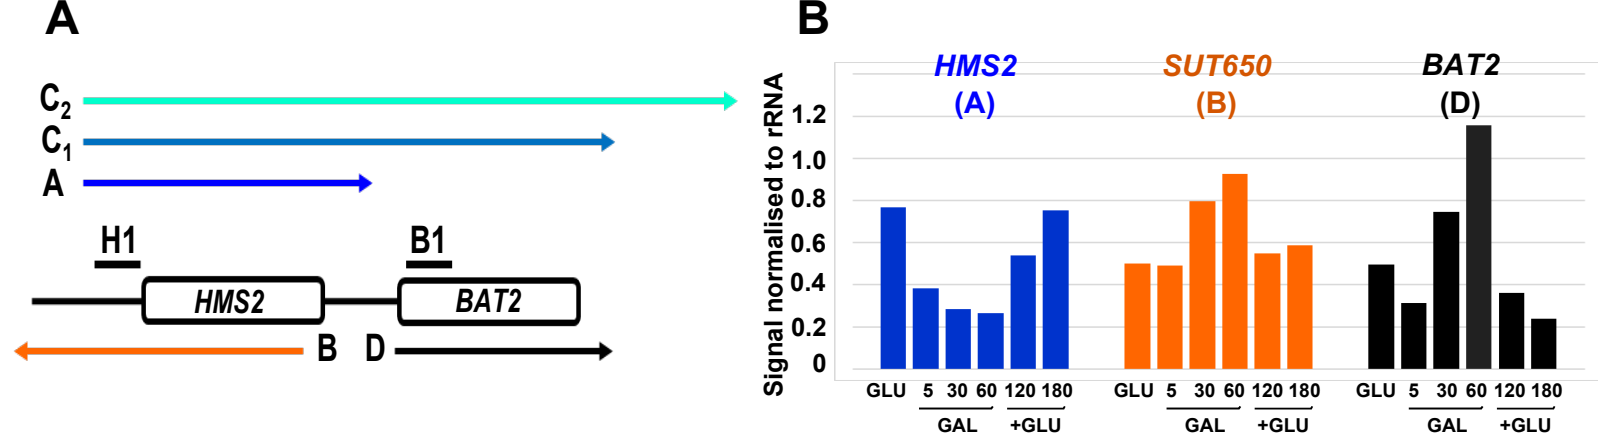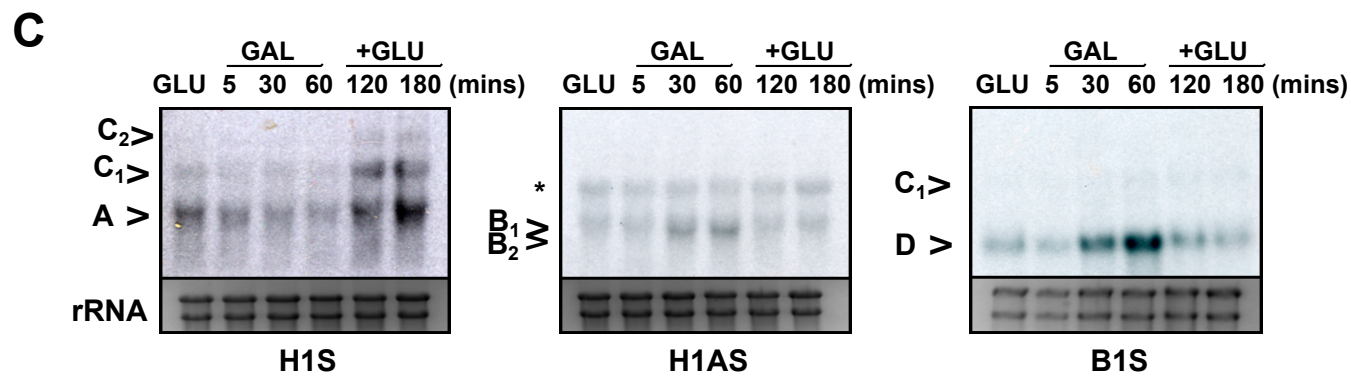

Supplement: supp [file elife_poa_e03635_Figure_2_figure_supplement_1.pdf › elife_poa_e03635_Figure_2_figure_supplement_1.pdf]

**A**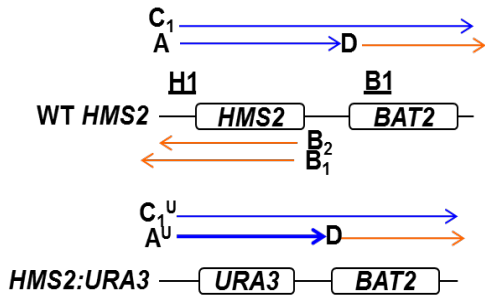**B**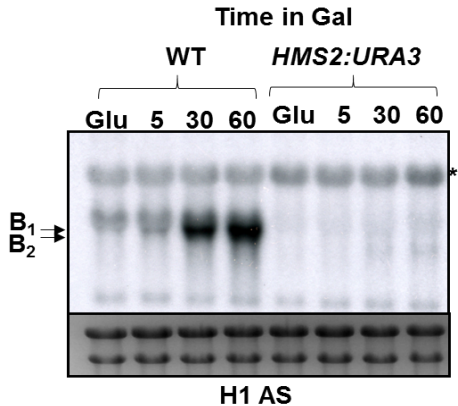

Supplement: supp [file elife_poa_e03635_Figure_4_figure_supplement_1.pdf › elife_poa_e03635_Figure_4_figure_supplement_1.pdf]

**A**

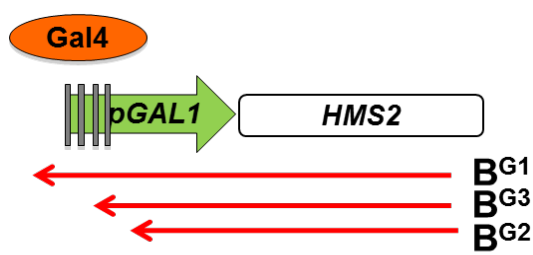

**B**

*pGAL1.HMS2*, glucose

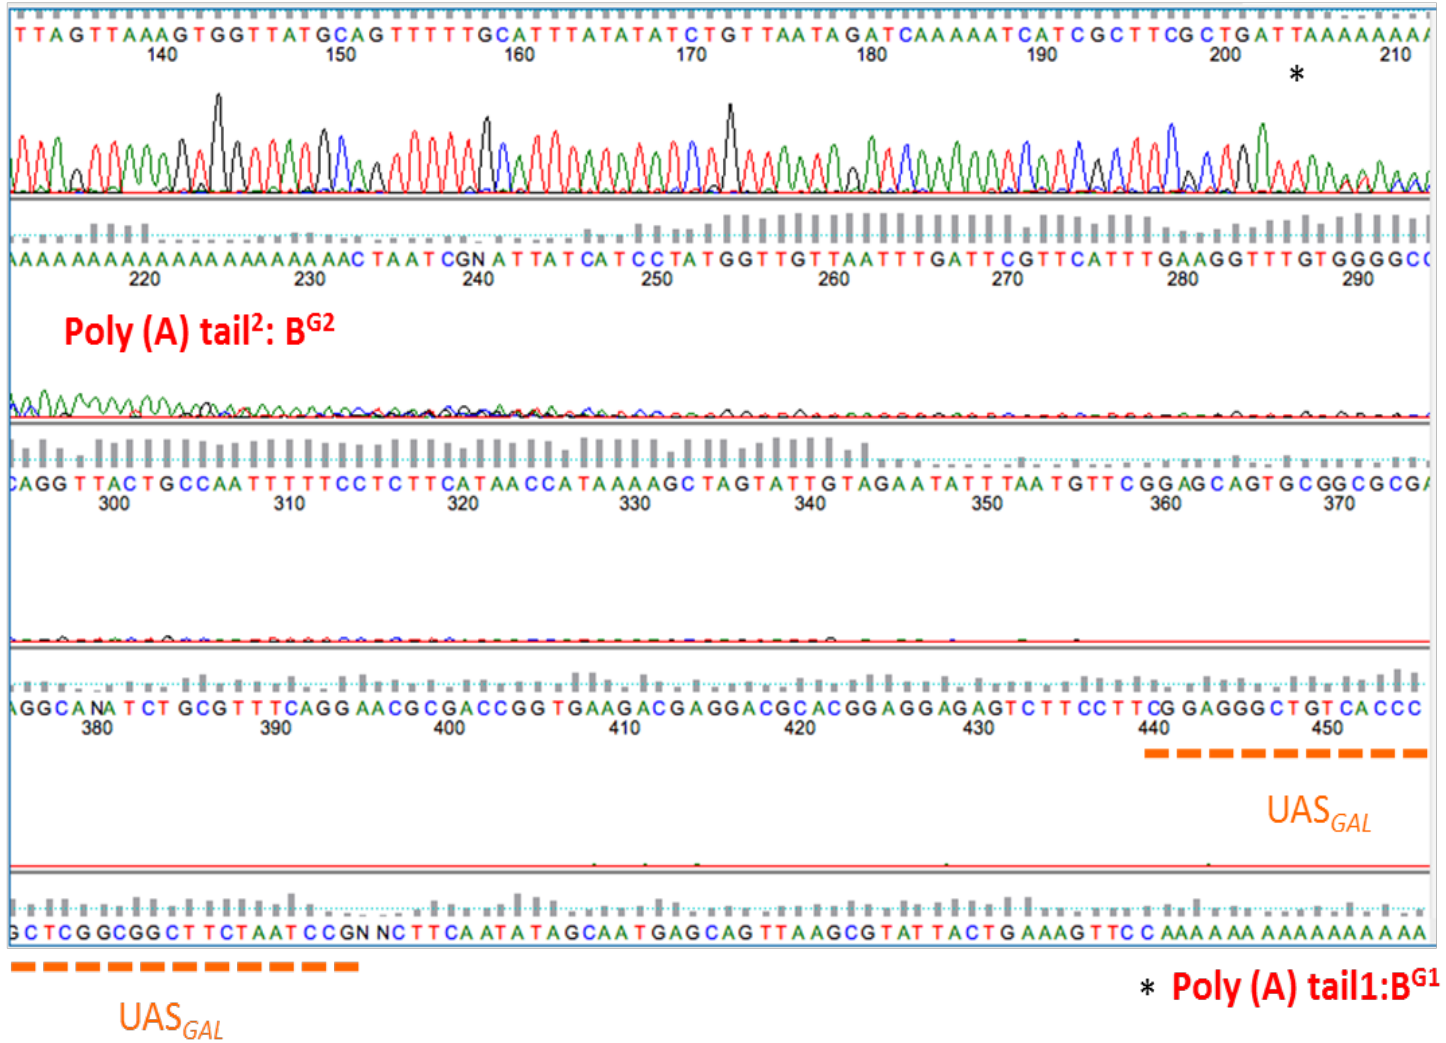

**C**

*pGAL1.HMS2*, 3h galactose

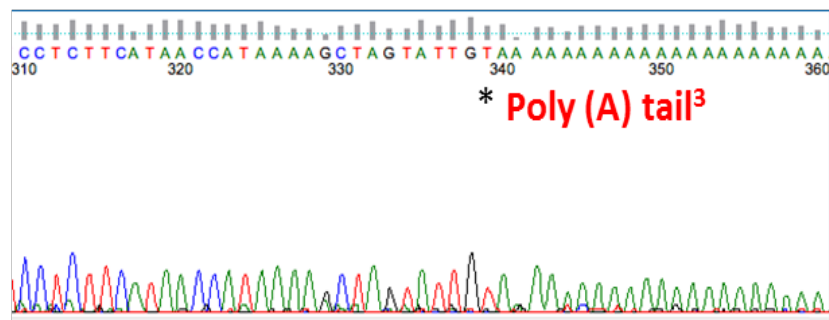

Supplement: supp [file elife_poa_e03635_Figure_5_figure_supplement_1.pdf › elife_poa_e03635_Figure_5_figure_supplement_1.pdf]

**A**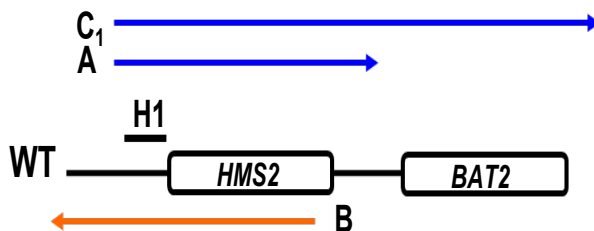**B**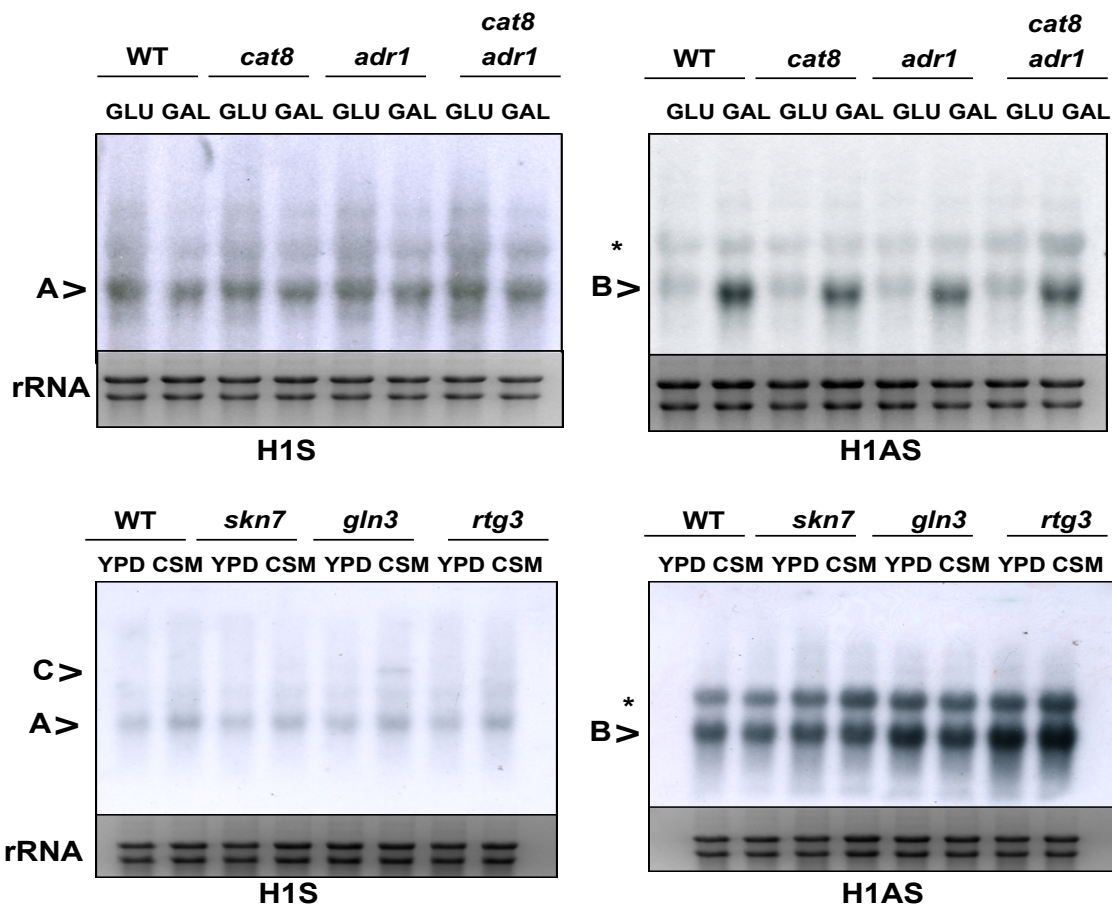**C**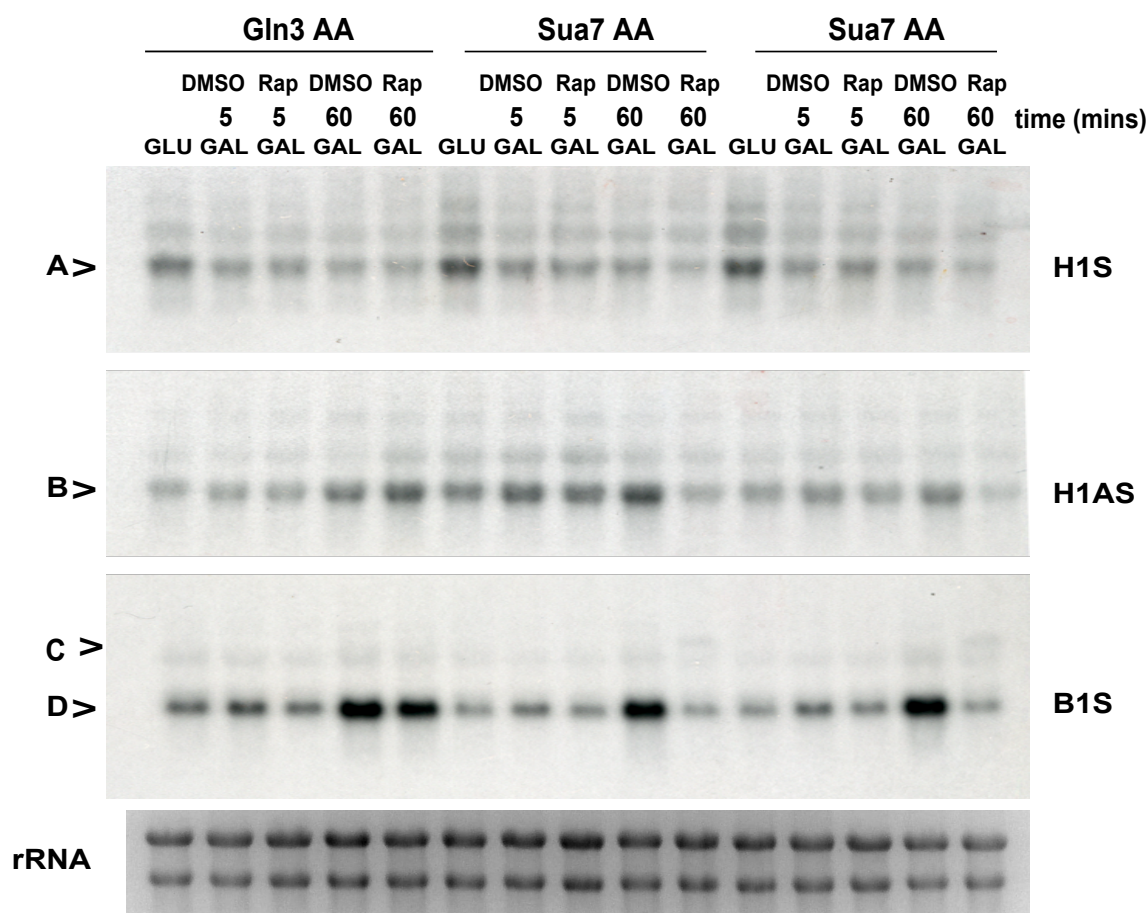

Supplement: supp [file elife_poa_e03635_Figure_6_figure_supplement_1.pdf › elife_poa_e03635_Figure_6_figure_supplement_1.pdf]
